# Supplementary material for: High-confidence coding and noncoding transcriptome maps
Source: PubMed Central journal article supplement — Genome Res. 2017 Jun;27(6):1050–62. doi: 10.1101/gr.214288.116 (PMC5453319; doi:10.1101/gr.214288.116), 2017-06
Supplement: supp_gr.214288.116_Supplemental_Fig_S2.pdf [file supp_gr.214288.116_Supplemental_Fig_S2.pdf]

Figure S2

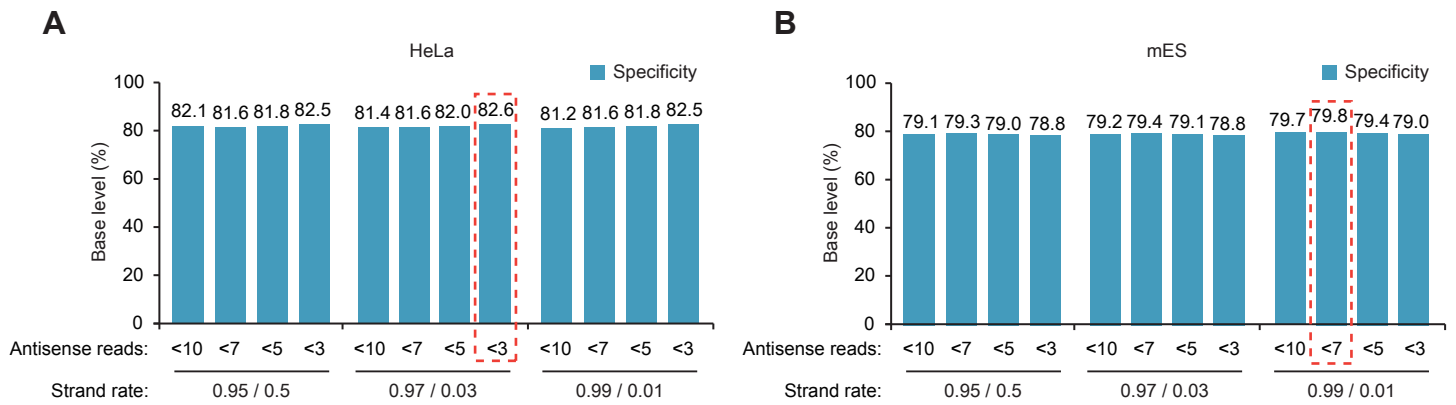

**Figure S2. Criteria for transfrag classification**

(A-B) Shown are the specificities of correct transfrags across strand rates and antisense read numbers. The strand rate and the antisense read number that display the maximum specificity were used as criteria (dotted box) for the classification of transfrags in HeLa (A) and in mES cells (B).
