# Supplementary material for: High-confidence coding and noncoding transcriptome maps
Source: PubMed Central journal article supplement — Genome Res. 2017 Jun;27(6):1050–62. doi: 10.1101/gr.214288.116 (PMC5453319; doi:10.1101/gr.214288.116), 2017-06
Supplement: supp_gr.214288.116_Supplemental_Fig_S3.pdf [file supp_gr.214288.116_Supplemental_Fig_S3.pdf]

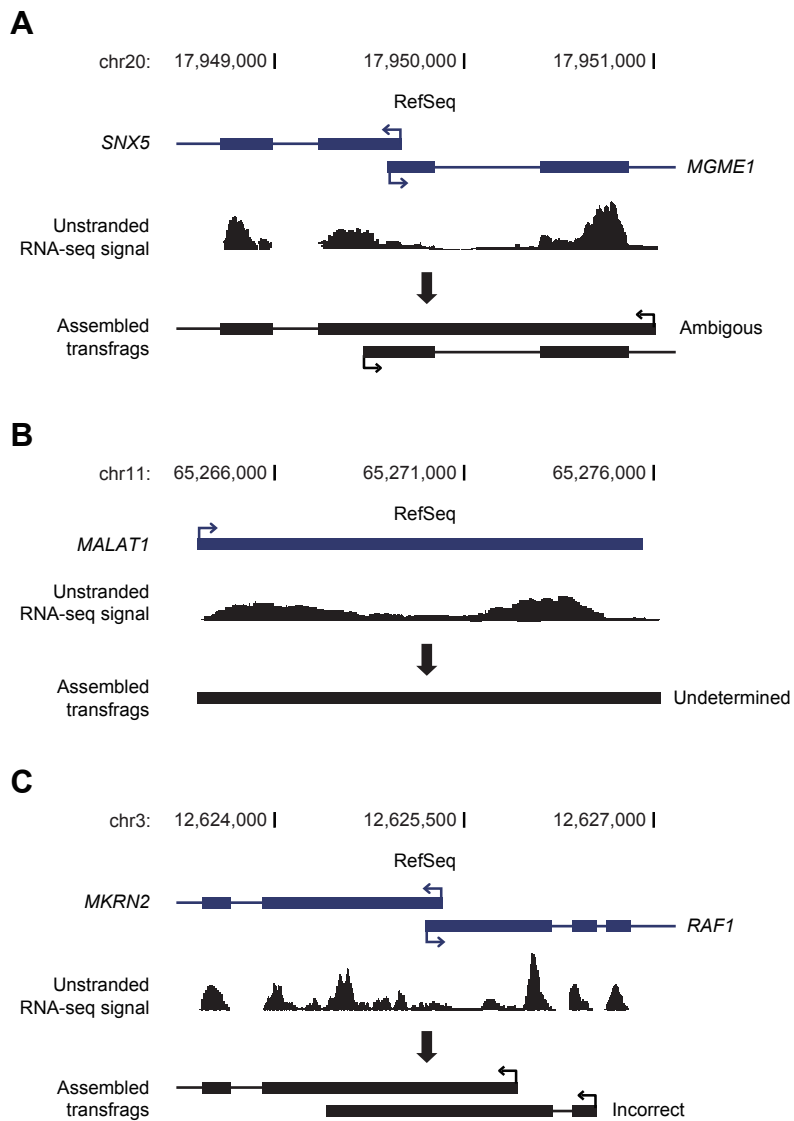

**Figure S3. Problematic transfrags assembled from unstranded RNA-seq**

(A-C) Examples of problematic transfrags belong to three groups – ambiguous (A), undetermined (B), and incorrect (C). Graphs are signals from unstranded RNA-seq data.
