# Supplementary material for: High-confidence coding and noncoding transcriptome maps
Source: PubMed Central journal article supplement — Genome Res. 2017 Jun;27(6):1050–62. doi: 10.1101/gr.214288.116 (PMC5453319; doi:10.1101/gr.214288.116), 2017-06
Supplement: supp_gr.214288.116_Supplemental_Fig_S4.pdf [file supp_gr.214288.116_Supplemental_Fig_S4.pdf]

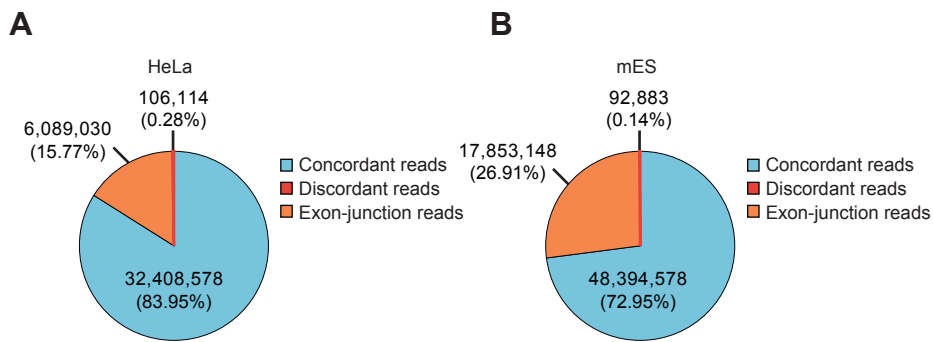

**Figure S4. Concordant and discordant predictions of paired-end reads**

(A-B) Percentage of concordant (blue), discordant (red), and exon-junction-support (orange) predictions of strand information for paired-end reads in HeLa cells (A) and mES cells (B).
