# Supplementary material for: High-confidence coding and noncoding transcriptome maps
Source: PubMed Central journal article supplement — Genome Res. 2017 Jun;27(6):1050–62. doi: 10.1101/gr.214288.116 (PMC5453319; doi:10.1101/gr.214288.116), 2017-06
Supplement: supp_gr.214288.116_Supplemental_Fig_S5.pdf [file supp_gr.214288.116_Supplemental_Fig_S5.pdf]

Figure S5

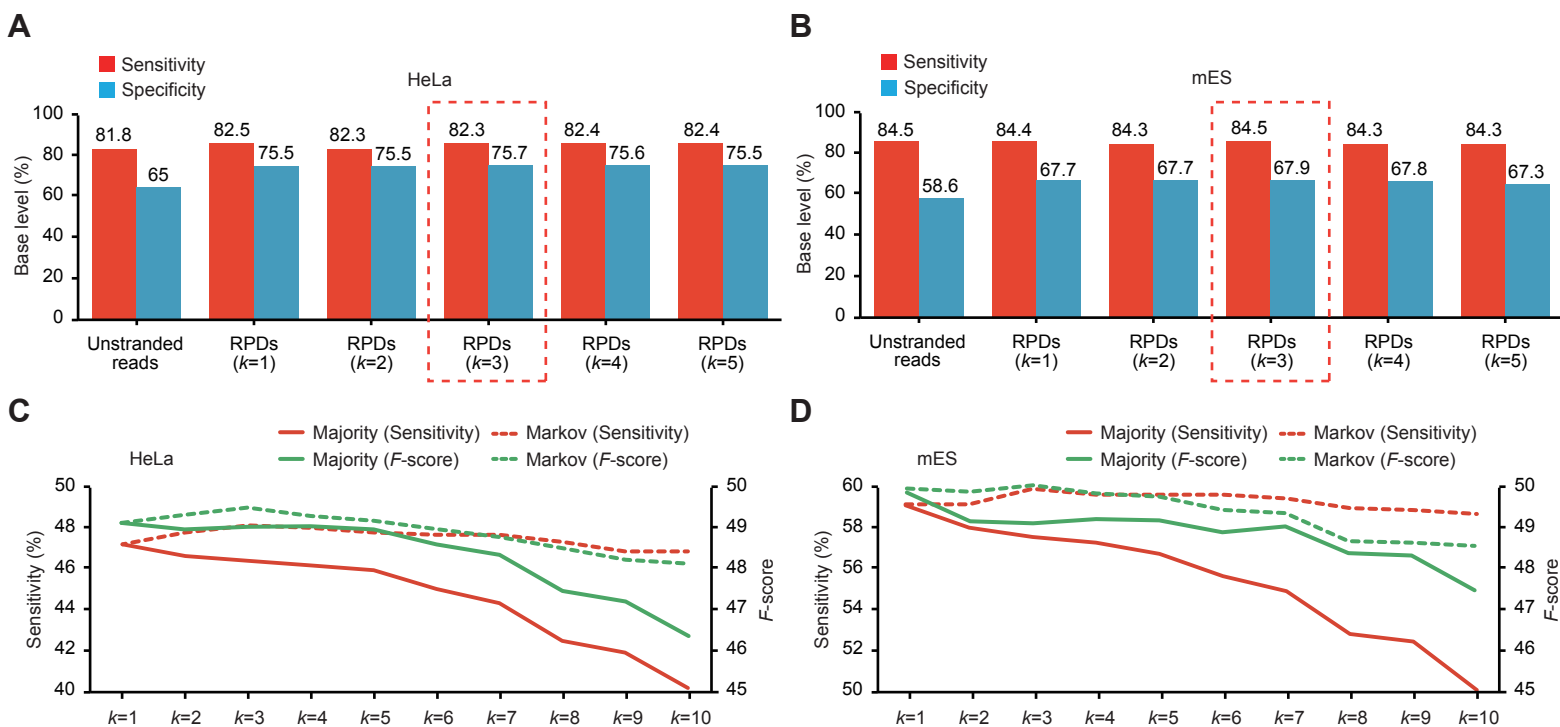

**Figure S5. Systematic analysis of MC  $k$ -order**

(A-B) Accuracies of RPDs across different  $k$ -orders. The optimal  $k$ -order (dotted box) was set as the  $k$  at which the specificity was maximized for HeLa (A) and mES cells (B). (C-D) Accuracies ( $F$ -scores and sensitivity) of RPDs by  $k$ MCs and  $k$ -nearest majority voting across different  $k$  values (from 1 to 10) for the antisense-overlapping loci in HeLa (C) and mES cells (D).  $F$ -score was calculated by the

$$\text{formula, } 2 \times \frac{(\text{Sensitivity} \times \text{Specificity})}{(\text{Sensitivity} + \text{Specificity})}$$
