# Supplementary material for: High-confidence coding and noncoding transcriptome maps
Source: PubMed Central journal article supplement — Genome Res. 2017 Jun;27(6):1050–62. doi: 10.1101/gr.214288.116 (PMC5453319; doi:10.1101/gr.214288.116), 2017-06
Supplement: supp_gr.214288.116_Supplemental_Fig_S7.pdf [file supp_gr.214288.116_Supplemental_Fig_S7.pdf]

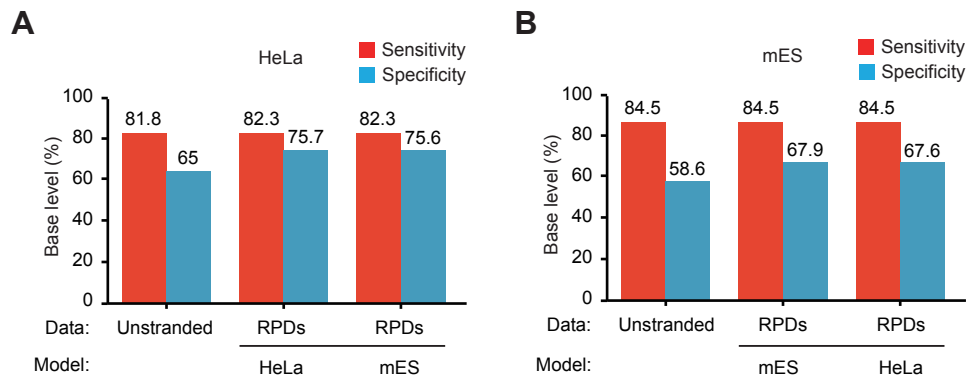

**Figure S7. Generality of the *kMC* model**

(A-B) Comparisons of unstranded, species-mismatched, and species-matched models. Accuracies of unstranded, species-mismatched (by the *kMC* models trained in mES cells), and species-matched models (by the *kMC* models trained in HeLa cells) in HeLa cells (A) and vice versa (B).
