# Supplementary material for: High-confidence coding and noncoding transcriptome maps
Source: PubMed Central journal article supplement — Genome Res. 2017 Jun;27(6):1050–62. doi: 10.1101/gr.214288.116 (PMC5453319; doi:10.1101/gr.214288.116), 2017-06
Supplement: supp_gr.214288.116_Supplemental_Fig_S8.pdf [file supp_gr.214288.116_Supplemental_Fig_S8.pdf]

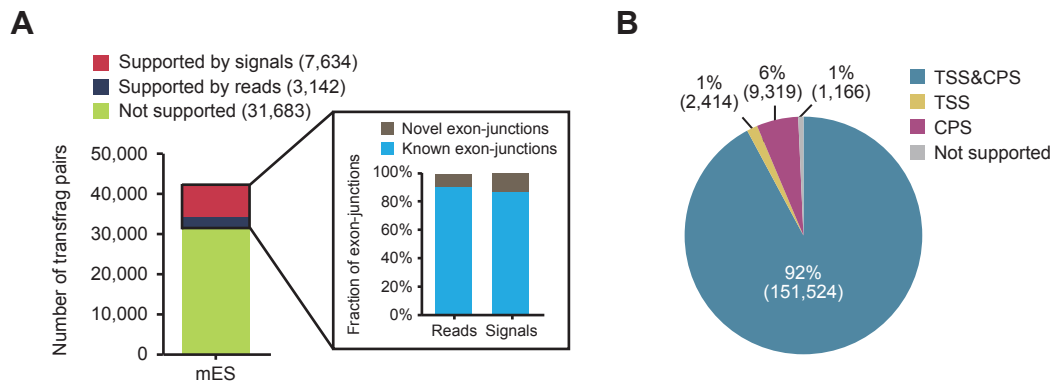

### Figure S8. Updating mES cell transcript models

(A) The number of neighboring transfrag pairs supported by putative splicing signals (red), by exon-junction reads (navy), and by neither (olive) in mES cells. Otherwise, as in Fig. 3B. (B) The fraction of transfrags updated with both TSS and CPS (blue), with only TSS (yellow), with only CPS (magenta), and with neither TSS or CPS (grey) in mES cells.
