# Supplementary material for: High-confidence coding and noncoding transcriptome maps
Source: PubMed Central journal article supplement — Genome Res. 2017 Jun;27(6):1050–62. doi: 10.1101/gr.214288.116 (PMC5453319; doi:10.1101/gr.214288.116), 2017-06
Supplement: supp_gr.214288.116_Supplemental_Fig_S9.pdf [file supp_gr.214288.116_Supplemental_Fig_S9.pdf]

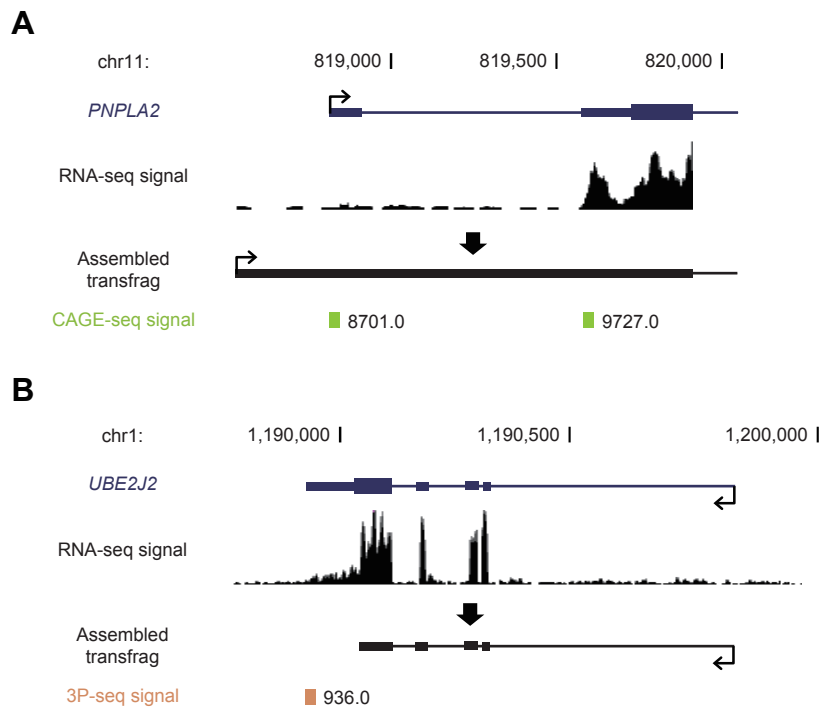

**Figure S9. Erroneous transfrag boundaries**

(A) Shown is an example of mis-assembly of *PNPLA2* at its 5' end, evident by CAGE-seq signals. (B) Shown is an example of mis-assembly of *UBE2J2* at its 3' end, evident by 3P-seq signals.
