# Supplementary material for: High-confidence coding and noncoding transcriptome maps
Source: PubMed Central journal article supplement — Genome Res. 2017 Jun;27(6):1050–62. doi: 10.1101/gr.214288.116 (PMC5453319; doi:10.1101/gr.214288.116), 2017-06
Supplement: supp_gr.214288.116_Supplemental_Fig_S10.pdf [file supp_gr.214288.116_Supplemental_Fig_S10.pdf]

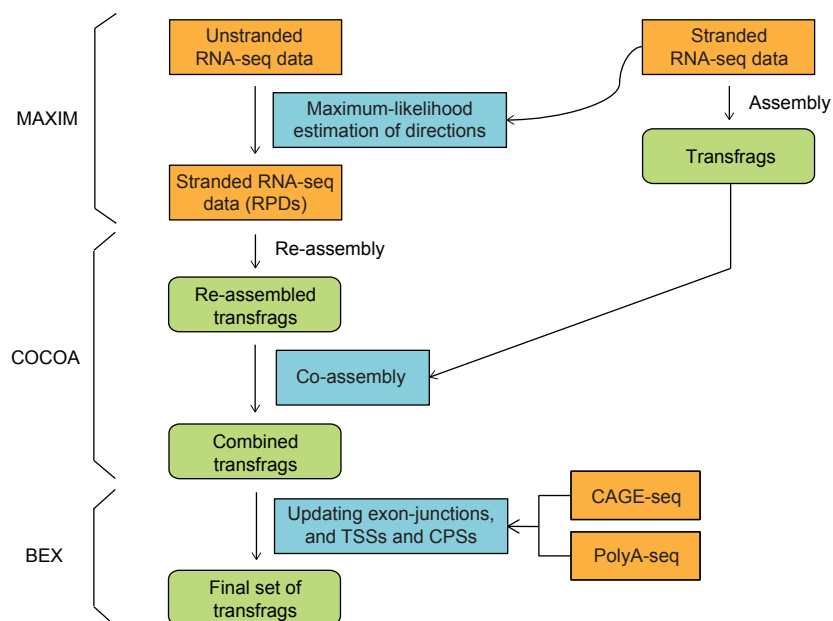

**Figure S10. A schematic flow of the CAFE pipeline**

Shown is the schematic flow of the CAFE pipeline according to the combined, strand-specific support and strand-specific assembly. If there are both stranded and unstranded reads in the same cell type, the MAXIM, COCOA, and BEX steps are all executed. If there are only unstranded reads, the MAXIM step is carried out with the pooled stranded RNA-seq data.
