# Supplementary material for: High-confidence coding and noncoding transcriptome maps
Source: PubMed Central journal article supplement — Genome Res. 2017 Jun;27(6):1050–62. doi: 10.1101/gr.214288.116 (PMC5453319; doi:10.1101/gr.214288.116), 2017-06
Supplement: supp_gr.214288.116_Supplemental_Fig_S11.pdf [file supp_gr.214288.116_Supplemental_Fig_S11.pdf]

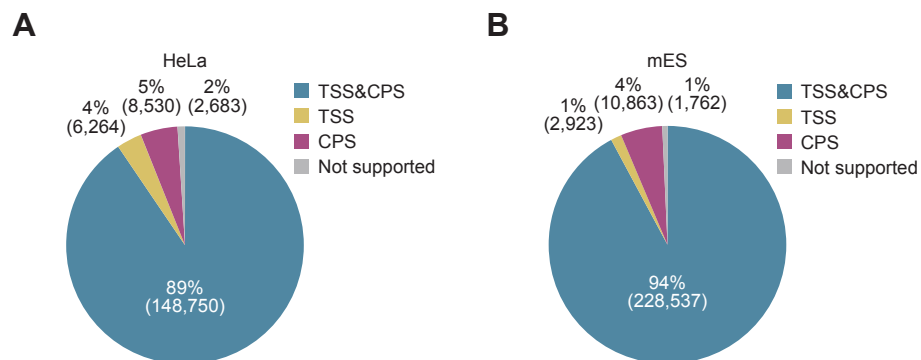

**Figure S11. The fraction of transcriptomes co-assembled with RPDs and stranded reads**

(A-B) The fraction of transcriptomes updated with both TSS and CPS (blue), with only TSS (yellow), with only CPS (magenta), and with neither TSS or CPS (grey) in HeLa (A) and in mES cells (B).
