# Supplementary material for: High-confidence coding and noncoding transcriptome maps
Source: PubMed Central journal article supplement — Genome Res. 2017 Jun;27(6):1050–62. doi: 10.1101/gr.214288.116 (PMC5453319; doi:10.1101/gr.214288.116), 2017-06
Supplement: supp_gr.214288.116_Supplemental_Fig_S12.pdf [file supp_gr.214288.116_Supplemental_Fig_S12.pdf]

Figure S12

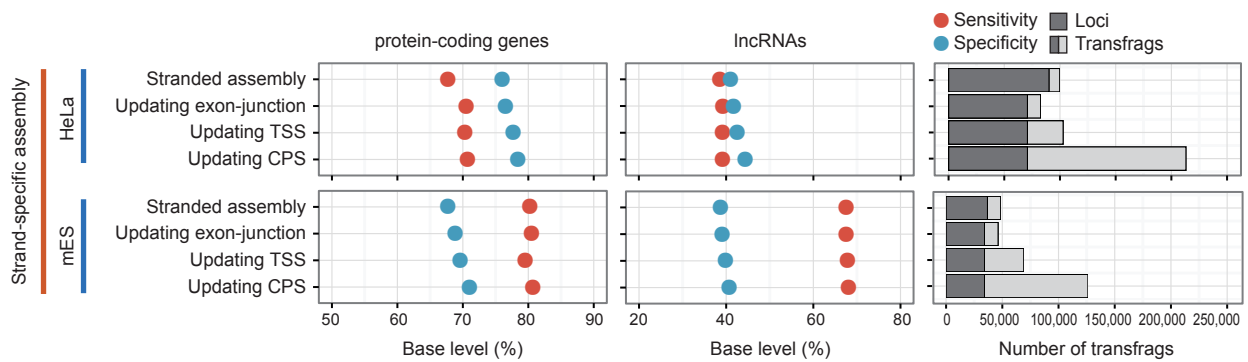

**Figure S12. Evaluation of transcriptomes assembled with only stranded reads**

(A) Shown are the accuracies and sizes of strand-specific transcriptomes assembled using only stranded reads in HeLa (top) and mES cells (bottom). Otherwise, as in Fig. 4.
