# Supplementary material for: High-confidence coding and noncoding transcriptome maps
Source: PubMed Central journal article supplement — Genome Res. 2017 Jun;27(6):1050–62. doi: 10.1101/gr.214288.116 (PMC5453319; doi:10.1101/gr.214288.116), 2017-06
Supplement: supp_gr.214288.116_Supplemental_Fig_S13.pdf [file supp_gr.214288.116_Supplemental_Fig_S13.pdf]

Figure S13

A

| Annotation (%)                  | Cerebellum |      |              |      | Cortex     |      |              |      | FrontalCortex |      |              |      | Hippocampus |      |              |      | Hypothalamus |      |              |      | Esophagus  |      |              |      | Kidney     |      |              |      |
|---------------------------------|------------|------|--------------|------|------------|------|--------------|------|---------------|------|--------------|------|-------------|------|--------------|------|--------------|------|--------------|------|------------|------|--------------|------|------------|------|--------------|------|
|                                 | Base level |      | Intron level |      | Base level |      | Intron level |      | Base level    |      | Intron level |      | Base level  |      | Intron level |      | Base level   |      | Intron level |      | Base level |      | Intron level |      | Base level |      | Intron level |      |
|                                 | SN         | SP   | SN           | SP   | SN         | SP   | SN           | SP   | SN            | SP   | SN           | SP   | SN          | SP   | SN           | SP   | SN           | SP   | SN           | SP   | SN         | SP   | SN           | SP   | SN         | SP   | SN           | SP   |
| RefSeq                          | 90.7       | 49.0 | 95.5         | 60.7 | 87.9       | 54.4 | 93.3         | 60.3 | 90.8          | 52.5 | 94.5         | 60.6 | 92.0        | 58.5 | 94.0         | 60.7 | 88.2         | 54.9 | 94.7         | 60.8 | 90.1       | 52.1 | 89.6         | 58.2 | 87.6       | 53.4 | 93.7         | 61.0 |
| GENCODE (manual)                | 84.2       | 63.3 | 94.0         | 94.7 | 87.1       | 65.5 | 91.8         | 94.0 | 84.7          | 67.7 | 92.0         | 94.4 | 85.3        | 67.3 | 92.5         | 94.7 | 89.1         | 66.0 | 93.2         | 95.0 | 84.5       | 64.9 | 88.7         | 91.3 | 82.7       | 66.4 | 92.4         | 95.3 |
| GENCODE (automatic)             | 94.0       | 31.2 | 94.7         | 23.4 | 84.1       | 33.4 | 96.1         | 24.5 | 88.0          | 34.1 | 96.7         | 22.5 | 94.1        | 33.9 | 95.1         | 25.6 | 92.4         | 35.6 | 96.5         | 24.5 | 89.4       | 32.4 | 96.8         | 24.7 | 86.1       | 35.3 | 96.2         | 23.6 |
| PacBio (MCF7)                   | 82.8       | 47.0 | 89.9         | 59.9 | 86.3       | 43.2 | 91.6         | 59.3 | 84.1          | 46.0 | 90.0         | 57.2 | 87.2        | 39.7 | 90.5         | 59.2 | 84.4         | 37.6 | 90.3         | 59.2 | 85.0       | 37.9 | 91.3         | 58.1 | 79.1       | 48.3 | 91.1         | 59.7 |
| EST                             | .          | .    | 77.7         | 78.2 | .          | .    | 76.2         | 78.0 | .             | .    | 77.0         | 78.1 | .           | .    | 76.6         | 78.3 | .            | .    | 77.1         | 78.5 | .          | .    | 74.0         | 76.0 | .          | .    | 76.5         | 78.9 |
| RefSeq + GENCODE + PacBio + EST | .          | .    | 80.9         | 95.3 | .          | .    | 79.2         | 94.7 | .             | .    | 80.1         | 95.1 | .           | .    | 79.7         | 95.3 | .            | .    | 80.3         | 95.6 | .          | .    | 79.4         | 92.0 | .          | .    | 79.5         | 95.8 |

  

| Annotation (%)                  | Liver      |      |              |      | Lung       |      |              |      | Ovary      |      |              |      | Pancreas   |      |              |      | Prostate   |      |              |      | Testis     |      |              |      | Whole Blood |      |              |      |
|---------------------------------|------------|------|--------------|------|------------|------|--------------|------|------------|------|--------------|------|------------|------|--------------|------|------------|------|--------------|------|------------|------|--------------|------|-------------|------|--------------|------|
|                                 | Base level |      | Intron level |      | Base level |      | Intron level |      | Base level |      | Intron level |      | Base level |      | Intron level |      | Base level |      | Intron level |      | Base level |      | Intron level |      | Base level  |      | Intron level |      |
|                                 | SN         | SP   | SN           | SP   | SN          | SP   | SN           | SP   |
| RefSeq                          | 90.3       | 51.5 | 92.4         | 60.7 | 91.2       | 49.6 | 95.9         | 58.9 | 88.8       | 49.6 | 93.8         | 60.5 | 90.9       | 50.9 | 94.0         | 59.2 | 91.3       | 49.2 | 95.6         | 59.9 | 93.7       | 50.3 | 98.2         | 57.6 | 93.0        | 45.4 | 95.9         | 56.9 |
| GENCODE (manual)                | 83.4       | 67.4 | 91.0         | 94.7 | 81.4       | 64.2 | 94.6         | 92.0 | 86.4       | 64.2 | 92.2         | 94.2 | 84.5       | 67.3 | 92.3         | 92.2 | 86.3       | 63.7 | 94.1         | 93.5 | 88.7       | 64.4 | 97.6         | 90.8 | 89.7        | 59.4 | 94.8         | 89.3 |
| GENCODE (automatic)             | 86.1       | 43.2 | 96.8         | 24.8 | 89.4       | 31.2 | 97.1         | 23.9 | 94.3       | 38.1 | 96.7         | 24.6 | 92.1       | 43.1 | 96.7         | 24.3 | 92.7       | 37.1 | 97.2         | 22.2 | 94.5       | 31.5 | 97.5         | 22.4 | 91.3        | 29.8 | 96.9         | 23.4 |
| PacBio (MCF7)                   | 82.7       | 40.1 | 91.1         | 60.0 | 83.1       | 39.0 | 91.4         | 58.1 | 83.8       | 38.8 | 89.2         | 59.5 | 84.9       | 41.7 | 91.4         | 58.8 | 84.0       | 37.7 | 90.4         | 58.7 | 84.6       | 38.3 | 89.1         | 56.9 | 88.3        | 36.0 | 91.5         | 57.1 |
| EST                             | .          | .    | 75.7         | 78.7 | .          | .    | 78.2         | 76.0 | .          | .    | 76.6         | 78.2 | .          | .    | 76.6         | 76.4 | .          | .    | 77.8         | 77.2 | .          | .    | 80.1         | 74.4 | .           | .    | 78.6         | 73.8 |
| RefSeq + GENCODE + PacBio + EST | .          | .    | 78.5         | 95.3 | .          | .    | 81.7         | 92.7 | .          | .    | 79.4         | 94.8 | .          | .    | 79.5         | 92.7 | .          | .    | 81.0         | 94.1 | .          | .    | 83.9         | 91.5 | .           | .    | 81.8         | 90.1 |

  

| Annotation (%)                  | ESCA       |      |              |      | HNSC       |      |              |      | LIHC       |      |              |      | LUAD       |      |              |      | LUSC       |      |              |      |
|---------------------------------|------------|------|--------------|------|------------|------|--------------|------|------------|------|--------------|------|------------|------|--------------|------|------------|------|--------------|------|
|                                 | Base level |      | Intron level |      | Base level |      | Intron level |      | Base level |      | Intron level |      | Base level |      | Intron level |      | Base level |      | Intron level |      |
|                                 | SN         | SP   | SN           | SP   |
| RefSeq                          | 91.1       | 45.2 | 96.4         | 56.8 | 88.6       | 51.9 | 98.1         | 59.9 | 91.4       | 51.4 | 98.4         | 58.5 | 87.7       | 46.9 | 96.3         | 59.7 | 89.4       | 50.8 | 97.6         | 59.6 |
| GENCODE (manual)                | 88.0       | 60.6 | 96.5         | 90.2 | 89.2       | 57.0 | 98.0         | 95.0 | 88.3       | 55.9 | 97.7         | 92.2 | 86.9       | 52.1 | 98.6         | 94.9 | 89.1       | 54.8 | 97.8         | 94.6 |
| GENCODE (automatic)             | 92.8       | 30.7 | 97.6         | 23.4 | 91.4       | 33.8 | 97.2         | 23.9 | 89.5       | 33.7 | 97.6         | 23.6 | 87.6       | 30.2 | 97.4         | 23.8 | 90.7       | 34.4 | 95.9         | 23.1 |
| PacBio (MCF7)                   | 82.6       | 35.2 | 92.0         | 57.1 | 80.2       | 39.1 | 90.1         | 57.8 | 84.8       | 41.3 | 91.7         | 57.3 | 85.0       | 35.3 | 91.2         | 57.6 | 82.0       | 38.3 | 89.9         | 56.3 |
| EST                             | .          | .    | 79.6         | 74.3 | .          | .    | 80.4         | 77.9 | .          | .    | 80.3         | 75.7 | .          | .    | 80.8         | 77.7 | .          | .    | 81.2         | 74.7 |
| RefSeq + GENCODE + PacBio + EST | .          | .    | 83.8         | 91.2 | .          | .    | 84.9         | 95.8 | .          | .    | 84.0         | 93.0 | .          | .    | 84.4         | 95.7 | .          | .    | 83.7         | 94.4 |

B

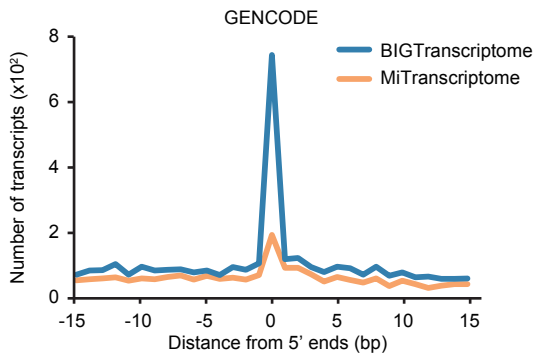

C

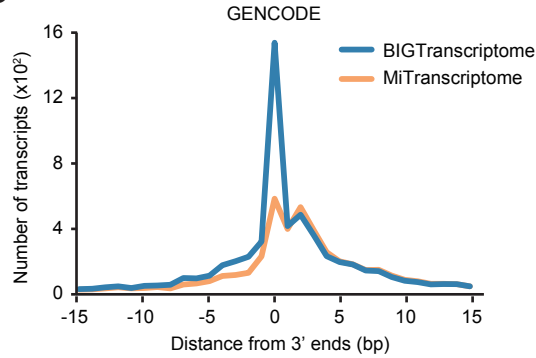

D

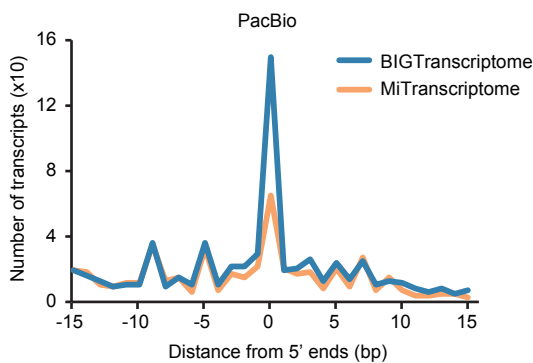

E

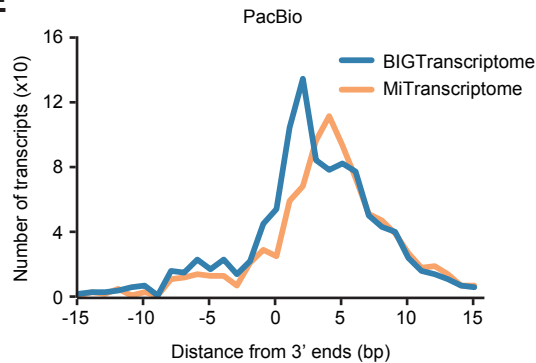

**Figure S13. Accuracies of BIGTranscriptome-TS and boundary comparisons of BIGTranscriptome**

(A) Shown are the accuracies of BIGTranscriptome-TS (19 tissues and cancer) at the base and intron levels compared with those of four different sets of annotations (RefSeq, manual and automatic GENCODE, PacBio, and EST) and a combined set of annotations. SN: sensitivity and SP: specificity. (B-C) Shown are the relative distances from the ends of GENCODE transcripts with the same splicing pattern to the ends of BIGTranscriptome isoforms (blue) versus to the ends of MiTranscriptome isoforms (orange). (B) for the 5' end and (C) for the 3' end. (D-E) Shown are the relative distances from the ends of the PacBio (MCF7) transcripts with the same splicing pattern to the ends of BIGTranscriptome isoforms versus to the ends of MiTranscriptome (orange). (D) for the 5' end and (E) for the 3' end.
