# Supplementary material for: High-confidence coding and noncoding transcriptome maps
Source: PubMed Central journal article supplement — Genome Res. 2017 Jun;27(6):1050–62. doi: 10.1101/gr.214288.116 (PMC5453319; doi:10.1101/gr.214288.116), 2017-06
Supplement: supp_gr.214288.116_Supplemental_Fig_S14.pdf [file supp_gr.214288.116_Supplemental_Fig_S14.pdf]

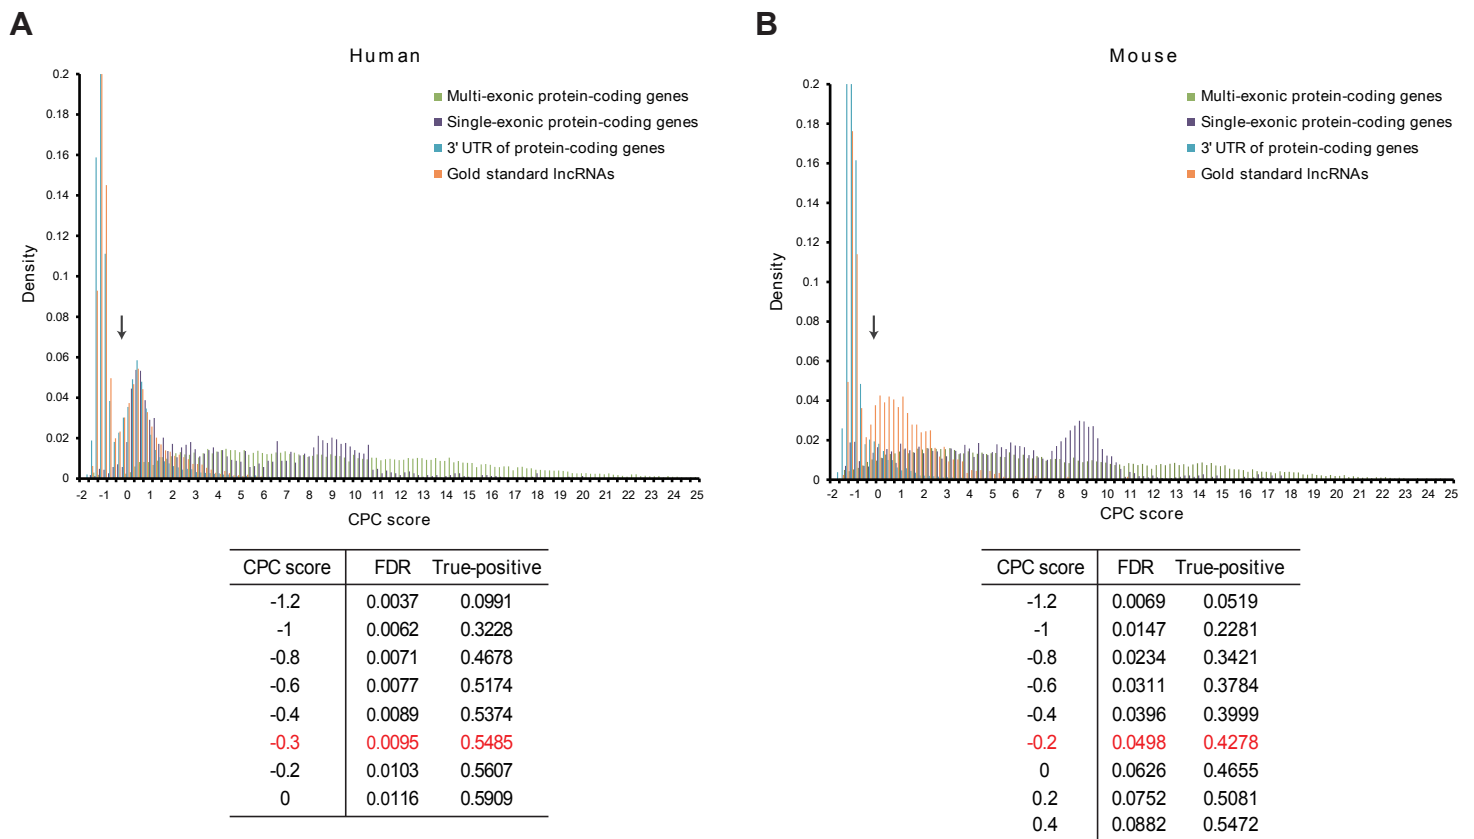

**Figure S14. The optimal cutoff value of the coding potential calculator (CPC)**

(A-B) Shown are the density graphs across different CPC scores of multi-exonic protein-coding genes (green), single-exonic protein-coding genes (purple), 3' UTRs (sky), and Gold standard lncRNAs (orange) in HeLa (A) and in mES cells (B).
