# Supplementary material for: High-confidence coding and noncoding transcriptome maps
Source: PubMed Central journal article supplement — Genome Res. 2017 Jun;27(6):1050–62. doi: 10.1101/gr.214288.116 (PMC5453319; doi:10.1101/gr.214288.116), 2017-06
Supplement: supp_gr.214288.116_Supplemental_Fig_S15.pdf [file supp_gr.214288.116_Supplemental_Fig_S15.pdf]

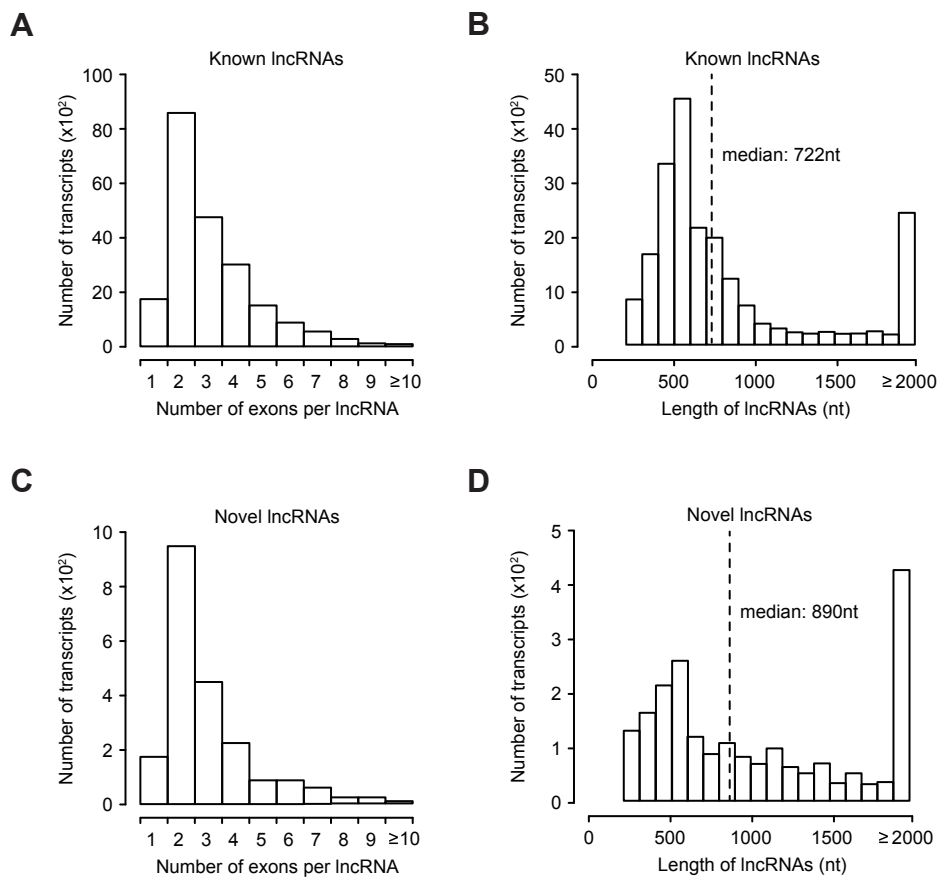

**Figure S15. Basic statistics of known and novel lncRNAs**

(A-D) The number of exons (A and C) and lengths (B and D) of known (A and B) and novel (C and D) lncRNAs in BIGTranscriptome. Vertical dotted lines indicate the medium length of lncRNAs.
