# Supplementary material for: High-confidence coding and noncoding transcriptome maps
Source: PubMed Central journal article supplement — Genome Res. 2017 Jun;27(6):1050–62. doi: 10.1101/gr.214288.116 (PMC5453319; doi:10.1101/gr.214288.116), 2017-06
Supplement: supp_gr.214288.116_Supplemental_Fig_S16.pdf [file supp_gr.214288.116_Supplemental_Fig_S16.pdf]

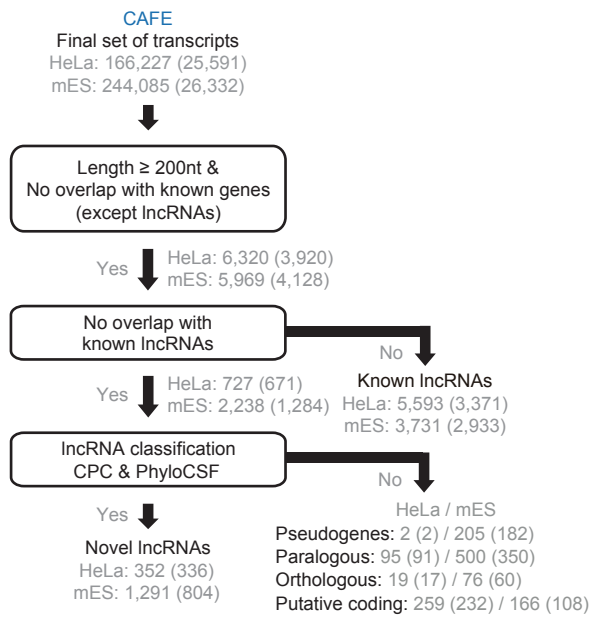

**Figure S16. Annotations of novel and known lncRNAs in mES cells**

A schematic flow for the annotation of novel and known lncRNAs in mES cells.
