# Supplementary material for: High-confidence coding and noncoding transcriptome maps
Source: PubMed Central journal article supplement — Genome Res. 2017 Jun;27(6):1050–62. doi: 10.1101/gr.214288.116 (PMC5453319; doi:10.1101/gr.214288.116), 2017-06
Supplement: supp_gr.214288.116_Supplemental_Fig_S17.pdf [file supp_gr.214288.116_Supplemental_Fig_S17.pdf]

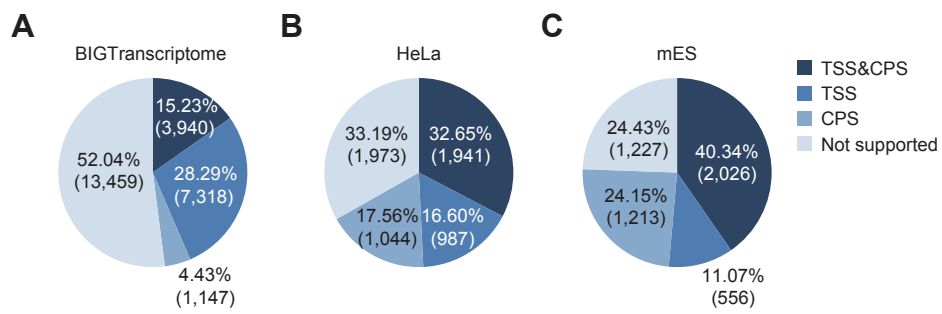

**Figure S17. The fraction of lncRNAs with evident TSS and CPS**

(A-C) The fractions of lncRNAs with both TSS and CPS, either site, or neither site are shown in pie charts for BIGTranscriptome (A), HeLa cells (B) and mES cells (C). The numbers in parentheses indicate the number of lncRNAs that belong to each group.
