# Supplementary material for: High-confidence coding and noncoding transcriptome maps
Source: PubMed Central journal article supplement — Genome Res. 2017 Jun;27(6):1050–62. doi: 10.1101/gr.214288.116 (PMC5453319; doi:10.1101/gr.214288.116), 2017-06
Supplement: supp_gr.214288.116_Supplemental_Fig_S18.pdf [file supp_gr.214288.116_Supplemental_Fig_S18.pdf]

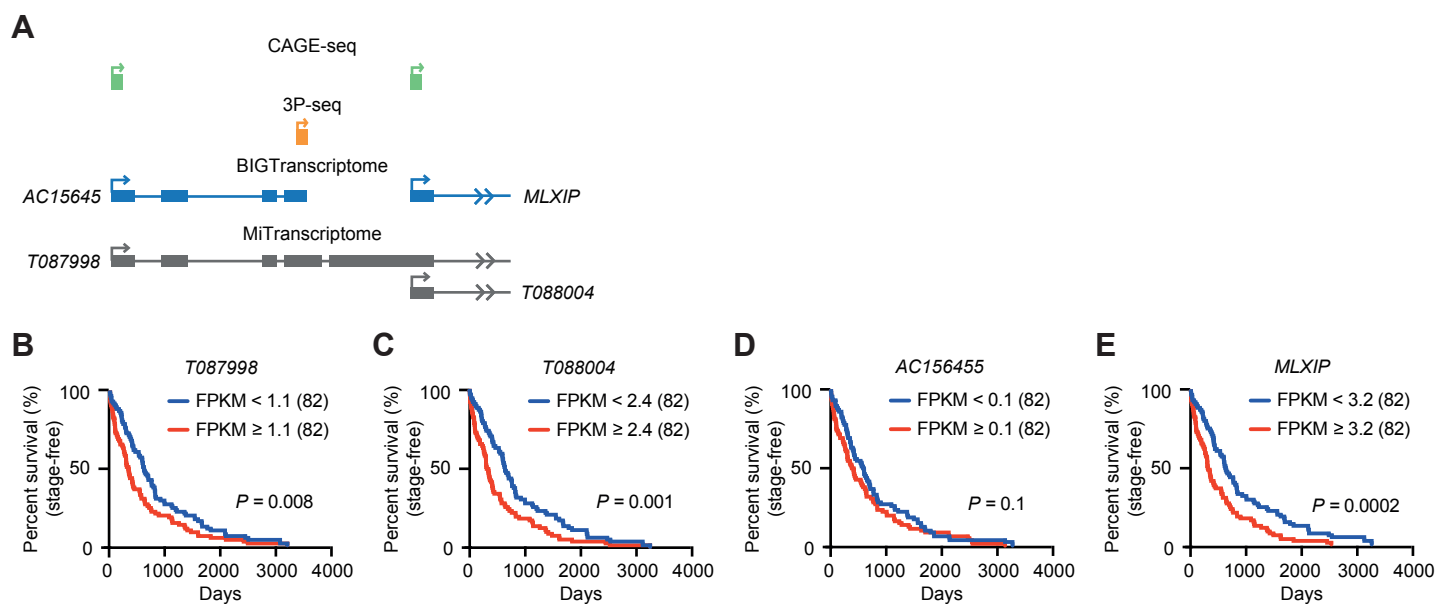

**Figure S18. Survival analysis for liver cancer samples based on mis-annotated transcripts**

(A) Gene models of a protein-coding gene, *MLXIP*, and a lincRNA, *AC156455*, in BIGTranscriptome and MiTranscriptome. (B-E) Survival analyses for TCGA liver cancer patient samples based on the gene models. 164 samples including termination events were divided into two groups, the top 50% and bottom 50%, according to the median FPKM values of *T087998* (B), *T088004* (C), *AC156455* (D), and *MLXIP* (E).
