# Supplementary material for: High-confidence coding and noncoding transcriptome maps
Source: HighWire-hosted journal article supplement (doi:10.1101/gr.214288.116), 2017-04-10
Supplement: Supplemental_Methods.docx [file Supplemental_Methods.docx]

**Supplemental Methods**

**Datasets** RNA-seq data used throughout this study were either from newly sequenced material or downloaded from public databases. A pair of stranded and unstranded RNA-seq datasets from mES cells were newly sequenced (GSE84946) and 169 publicly available samples of stranded and unstranded RNA-seq data from many different cell types, including HeLa and K562 cells, were downloaded from the ENCODE Project (www.encodeproject.org), Human BodyMap Project 2.0 (www.broadinstitute.org), and our previous work (GSE52531). To collect data produced by a similar library construction method, samples were selected with the following criteria: 1) samples with poly-A selection applied; 2) samples with stranded RNA-seq data passing a quality control filter (such that the specificity of the stranded assembly is equal to or greater than 45%); 3) samples with unstranded RNA-seq and stranded RNA-seq data from the same cell type. After filtration, 122 RNA-seq samples across 35 cell types were analyzed for transcriptome assembly. In addition, 2,496 individual samples of unstranded RNA-seq data from 14 different cell types were downloaded from the GTEx Project (<http://www.gtexportal.org>) and 197 esophageal carcinoma (ESCA), 553 head and neck squamous cell carcinoma (HNSC), 421 liver hepatocellular carcinoma (LIHC), 599 lung adenocarcinoma (LUAD) and 555 lung squamous cell carcinoma (LUSC) samples of unstranded RNA-seq were downloaded from TCGA Project ([Ciriello et al. 2013](#_ENREF_3); [Kandoth et al. 2013](#_ENREF_6)). The data were filtered with the same criteria above. 113 that did not meet with the criteria were excluded in the subsequent analyses. CAGE-seq processed data across 17 tissues for human and 23 tissues for mouse were downloaded from the FANTOM Project (www.fantom.gsc.riken.jp). CPS data from many different cell types (HeLa, HEK293, Huh7, and IMR90 for human; mES, 3T3, liver, muscle, heart, white adipose tissue, and kidney for mouse) were downloaded from NCBI GEO (GSE52531).

**RNA-seq library preparation** RNA from mES cells was extracted using an RNeasy kit (Qiagen, USA). Polyadenylated RNA was isolated using Oligo dT beads (Invitrogen, USA). Illumina Truseq stranded and unstranded mRNA library prep kits (Illumina, USA) were used for deep sequencing library preparation from 6 ug of total RNA according to the manufacturer's protocol. Libraries were sequenced in paired-end format to a length of 101bp using the HiSeq2000 platform (Macrogen Corporation, Republic of Korea).

**Preprocessing of RNA-seq data** To check RNA-seq data quality, RNA-seq readswere mapped to the corresponding reference genomes (hg19 for human and mm9 for mouse) using Bowtie (version 1.0.0) ([Langmead et al. 2009](#_ENREF_8)) with default parameters. We calculated mismatch rates across the mapped read positions. If the raw read end(s) had a mismatch rate higher than 10%, they were trimmed off using Seqtk (version 1.0-r31). In addition, the trimmed reads with Phred base quality ≤ 20 were filtered using Sickle (version 1.200) ([Joshi and Fass 2011](#_ENREF_5)). The remaining reads were mapped to the corresponding reference genomes using Tophat (version 2.0.6) with mapping parameters “-i 61 -l 265006 --min-segment-intron 61 --max-segment-intron 265006 -g 5” for human and “-i 52 -I 240764 --min-segment-intron 52 --max-segment-intron 240764 -g 5” for mouse.

**Antisense RNA-seq signals** To determine the criteria for judging the presence of the RNA-seq signal on the opposite strand of an annotated transfrag, we systematically analyzed the specificity of the base transcriptome assemblies over different antisense read numbers and strand rates (Supplemental Fig. S2). The antisense read numbers (less than 3 for HeLa; less than 7 for mES) and strand rates (0.03 for HeLa; 0.01 for mES) that displayed the maximum specificity were chosen as criteria.

**Base transcriptome assembly** Base transcriptome assemblies were performed using Cufflinks (version 2.1.1) with assembly parameters “--min-isoform-fraction 0.15 --pre-mrna-fraction 0.2 --junc-alpha 0.001 --small-anchor-fraction 0.06 --min-frags-per-transfrag 12 --max-multiread-fraction 0.65” for unstranded reads and “--min-isoform-fraction 0.05 --pre-mrna-fraction 0.2 --junc-alpha 0.01 --small-anchor-fraction 0.09 --min-frags-per-transfrag 8 --max-multiread-fraction 0.65” for stranded reads.

**Benchmarking base assembly** To evaluate the performance of CAFE with other base assemblers, we performed reference-based assembly using Scripture (a beta version) with the default parameter and StringTie (version 1.3.0) with the parameter “-m 0 -j 2 -g 50 -M 0.75” and *de novo* transcriptome assembly using Trinity (version 20140717) with the parameter “--min_contig_length 200” and Velvet (version 1.2.10) with the parameter “-hash_length 25 -min_contig_lgth 50”. For benchmarking of reference-based assemblers (Scripture, Cufflinks, and StringTie) and *de novo* assemblers (Trinity and Velvet), each base assembler assembled transcriptomes using stranded and unstranded reads, respectively, and their averaged performance (sensitivity and specificity) was measured and then compared to the performance of CAFE in the co-assembly of RPDs and stranded reads.

**PacBio transcriptome assembly** To assemble the transcriptome from PacBio Iso-seq data, we downloaded data from human MCF7 cell lines sequenced with a total of 119 SMRT cells from the PacBio website ([Pacific Biosciences](#_ENREF_9)). For subsequent analysis, we used the ‘Iso-seq’ protocol from the SMRT Portal provided by PacBio. Using the filtering module in the ‘Iso-seq’ protocol, we acquired 1,857,590 reads of insert from Iso-seq data. In this step, we set parameters as “Minimum_Full_Passes 0 Minimum Predicted Accuracy 75”. Next, the classify module filtered about two-thirds of the reads of insert from the above with parameters set as “Minimum_Sequence_Length 300 Full-Length_Reads_Do_Not_Require_PolyA_Tails False”, leaving 524,084 full-length reads. The last module was the cluster module, which left 80,010 polished isoforms with “Predict_Consensus_Isoforms_Using_The_ICE_Algorithm True Call_Quiver_To_Polish_Consensus_Isoforms True Minimum_Quiver_Accuracy_To_Classify_ An_Isofrom_AS_HQ 0.99” parameters. Finally, GMAP (version 2015-07-23) ([Wu and Watanabe 2005](#_ENREF_11)) was used with parameters “-f samse -n 0“ to map to the human genome, hg19. The final assembled set contained 47,416 non-redundant transcripts (15,688 genes).

**Reference gene annotations** Among the protein-coding genes and lncRNAs with “KNOWN” and “NOVEL” tags from GENCODE annotations (human: version 19, mouse: version M1), those with over 1 FPKM in the corresponding cells were selected. To build a bona fide lncRNA gene set, we performed the following filtration steps: (1) transcripts shorter than 200nt in length were discarded, and (2) lncRNAs sense-overlapping with exons of known protein-coding genes and noncoding genes (small ncRNAs including miRNAs, snRNAs, and snoRNAs and structural ncRNA genes including rRNAs and tRNAs) were excluded. As a result, 38,237 and 27,687 protein-coding genes and 4,380 and 1,328 lncRNAs were selected as reference gene annotations in human and mouse, respectively. The references were used to evaluate the quality of the transcriptome assemblies.

**Evaluation of transcriptome assembly** The base level sensitivity was calculated with the formula TP/(TP+FN), where TP is the count of nucleotides of the resulting transfrags falling within the reference protein-coding genes or lncRNA transcripts and FN is the count of nucleotides of the reference transcripts not falling within the resulting transfrags (Supplemental Fig. S1A). The base level specificity was calculated with the formula TP/(TP+FP), where FP is the count of nucleotides of the resulting transfrags not falling within the reference transcripts (Supplemental Fig. S1A). TP, FP, and FN were measured in a strand-specific manner. Transfrags without a determined direction are estimated on the assumption that there are either “+” and “-“ strands. When evaluating multiple isoforms, the union model was considered at the base level. However, for updating TSSs and CPSs, we chose the major isoform for the comparison. The intron-level sensitivity was also calculated with the formula TP/(TP+FN), where TP is the count of introns in the resulting transfrags that exactly match the introns (at both the 3’ and 5’ end) in the reference transcripts and FN is the count of introns in the reference transcripts that were not detected in the resulting transfrags (Supplemental Fig. S1A). The intron-level specificity was calculated with the formula TP/(TP+FP), where FP is the count of introns in the resulting transfrags that do not match the introns in the reference transcripts (Supplemental Fig. S1A). When evaluating multiple isoforms, the union set of introns were considered. To evaluate intron models,introns annotated in RefSeq, GENCODE, MiTranscriptome, and human ESTs from the UCSC genome database (<https://genome.ucsc.edu/index.html>) were extracted as references. Additionally, introns were compared to those detected via assembly of the long-read transcriptome from MCF7 cells. To acquire a confident set of introns from human ESTs, introns with a length within the range from the first to the 99th percentile of all known introns and showing a canonical GU-AG splice signal were selected. For comparison, the exact match with the same direction and genomic position was used.

**Classification of unknown transcripts** To annotate pseudogenes, we downloaded human and mouse pseudogene annotations from Ensembl (V74 for human and V60 for mouse). The transcripts overlapping pseudogene annotations were annotated as pseudogenes. Of the remainder, transcripts for which the longest open reading frames were significantly aligned (greater than 40%) to NCBI non-redundant (nr) database entries using BLASTX ([Altschul et al. 1990](#_ENREF_1)) were regarded as homologous genes. If the homologous gene was found in the corresponding species, it was regarded as a paralogous gene; otherwise, it was regarded as an orthologous gene. The genes with no significant homology were assigned as putative protein-coding genes.

**Classification of lncRNAs** We classified the putative lncRNAs as novel lncRNAs using two classifiers; (1) CPC, which is a BLASTX-based similarity search method against all non-redundant protein sequences and (2) PhyloCSF, which is a method to test whether an unknown sequence is evolved from coding or noncoding sequences using empirical codon models. Of the putative lncRNAs, those with a CPC score -0.3 for human and -0.2 for mouse and a PhyloCSF score 100 were classified as novel lncRNAs. Otherwise, they were classified as pseudogenes or orthologous, paralogous, or novel protein-coding genes. To find the optimal CPC score cutoff, we calculated CPC scores of reference protein-coding genes and lncRNAs in human and mouse, respectively. The cutoff at which the false discovery rate (FDR) was 0.01 for human and 0.05 for mouse and the true positive rate was maximized was chosen. The PhyloCSF score cutoff was derived from previous studies ([Cabili et al. 2011](#_ENREF_2); [Kelley and Rinn 2012](#_ENREF_7)).

**Survival analysis** mRNA-seq BAM files and clinical information associated with LIHC samples were downloaded from TCGA data portal (<https://tcga-data.nci.nih.gov/)>. The expression levels of genes annotated in BIGTranscriptome, MiTranscriptome, and GENCODE were calculated using Cufflinks ([Trapnell et al. 2010](#_ENREF_10)) as FPKMs. For 164 LIHC samples including termination events, survival analyses were conducted by Kaplan–Meier estimate ([Dinse and Lagakos 1982](#_ENREF_4)). To examine whether the survival rates could be differentiated by expression levels calculated from the gene models of BIGTranscriptome, MiTranscriptome, and GENCODE, the samples were divided into two groups with the median FPKM value of the corresponding gene or transcript. The *P* values were estimated using log-rank (Mantel-cox) test.

**References**

Altschul SF, Gish W, Miller W, Myers EW, Lipman DJ. 1990. Basic local alignment search tool. *Journal of molecular biology* 215(3): 403-410.

Cabili MN, Trapnell C, Goff L, Koziol M, Tazon-Vega B, Regev A, Rinn JL. 2011. Integrative annotation of human large intergenic noncoding RNAs reveals global properties and specific subclasses. *Genes & development* 25(18): 1915-1927.

Ciriello G, Miller ML, Aksoy BA, Senbabaoglu Y, Schultz N, Sander C. 2013. Emerging landscape of oncogenic signatures across human cancers. *Nature genetics* 45(10): 1127-1133.

Dinse GE, Lagakos SW. 1982. Nonparametric estimation of lifetime and disease onset distributions from incomplete observations. *Biometrics* 38(4): 921-932.

Joshi N, Fass J. 2011. Sickle: A sliding-window, adaptive, quality-based trimming tool for FastQ files (Version 1.33) [Sotfware].

Kandoth C, McLellan MD, Vandin F, Ye K, Niu B, Lu C, Xie M, Zhang Q, McMichael JF, Wyczalkowski MA et al. 2013. Mutational landscape and significance across 12 major cancer types. *Nature* 502(7471): 333-339.

Kelley D, Rinn J. 2012. Transposable elements reveal a stem cell-specific class of long noncoding RNAs. *Genome biology* 13(11): R107.

Langmead B, Trapnell C, Pop M, Salzberg SL. 2009. Ultrafast and memory-efficient alignment of short DNA sequences to the human genome. *Genome biology* 10(3): R25.

Pacific Biosciences. IsoSeq Human MCF7 Transcriptome. http://datasets.pacb.com.s3.amazonaws.com/2013/IsoSeqHumanMCF7Transcriptome/list.html

Trapnell C, Williams BA, Pertea G, Mortazavi A, Kwan G, van Baren MJ, Salzberg SL, Wold BJ, Pachter L. 2010. Transcript assembly and quantification by RNA-Seq reveals unannotated transcripts and isoform switching during cell differentiation. *Nature biotechnology* 28(5): 511-515.

Wu TD, Watanabe CK. 2005. GMAP: a genomic mapping and alignment program for mRNA and EST sequences. *Bioinformatics* 21(9): 1859-1875.
