# Supplementary material for: High-confidence coding and noncoding transcriptome maps
Source: HighWire-hosted journal article supplement (doi:10.1101/gr.214288.116), 2017-04-10
Supplement: Supplemental_Table_S1.xlsx [file Supplemental_Table_S1.xlsx]

## Sheet: Table S1
Table S1. Sample information
Species	Cell type	Library type	GEO ID	Read type	Total reads	Mapped reads	Mapping Rate (%)
Human	HeLa	Unstranded	GSM591659	2x75	12056666	9687977	80.35
			GSM591682	2x75	38143949	31022351	81.33
		Stranded	GSM546921	1x36	10225178	3602264	35.23
			GSM546927	1x36	19760003	5539743	28.04
			GSM591670	1x75	2977954	2115238	71.03
				1x75	7922875	5280178	66.64
			GSM591671	1x75	3196689	2137262	66.86
				1x75	8811258	6164667	69.96
Mouse	ES	Unstranded	GSM2254467	2x101	83647190	68247726	81.59
		Stranded	GSM2254468	2x101	83995303	68311283	81.33
