# Supplementary material for: High-confidence coding and noncoding transcriptome maps
Source: HighWire-hosted journal article supplement (doi:10.1101/gr.214288.116), 2017-04-10
Supplement: Supplemental_Table_S2.xlsx [file Supplemental_Table_S2.xlsx]

## Sheet: Table S2
Table S2. Statistics of transcriptome assemblies
Species	Cell type	Library type	Mapped reads	Transfrags (loci)	Sensitivity (%)	Specificity (%)
Human	HeLa	Unstranded	56893467	51,045 (38,207)	81.8	65.0
		Stranded	44443750	81,768 (78,200)	68.9	77.5
Mouse	ES	Unstranded	96629696	48,509 (35,277)	84.5	58.6
		Stranded	95412787	48,472 (36,250)	83.6	67.4
