# Supplementary material for: High-confidence coding and noncoding transcriptome maps
Source: HighWire-hosted journal article supplement (doi:10.1101/gr.214288.116), 2017-04-10
Supplement: Supplemental_Table_S3.xlsx [file Supplemental_Table_S3.xlsx]

## Sheet: Table S3
Table S3. RNA-seq datasets
Species	Study	Sample_type	Cell_and_tissue_types	Localization	Replicate	Library_type	Library_type2	Read type	Mapped reads	Acession number
Human	ENCODE	Cell_line	A549	Cell	1	Stranded	Paired-end	2x76	196599513	GSM758564
Human	ENCODE	Cell_line	A549	Cell	2	Stranded	Paired-end	2x76	247415155	GSM758564
Human	ENCODE	Cell_line	AG04450	Cell	1	Stranded	Paired-end	2x76	240941067	GSM758561
Human	ENCODE	Cell_line	AG04450	Cell	2	Stranded	Paired-end	2x76	231980450	GSM758561
Human	ENCODE	Cell_line	BJ	Cell	1	Stranded	Paired-end	2x76	221984839	GSM758562
Human	ENCODE	Cell_line	BJ	Cell	2	Stranded	Paired-end	2x76	216447090	GSM758562
Human	ENCODE	Cell_line	GM12878	Cell	1	Unstranded	Paired-end	2x75	114943975	GSM958728
Human	ENCODE	Cell_line	GM12878	Cell	2	Unstranded	Paired-end	2x75	192592535	GSM958728
Human	ENCODE	Cell_line	GM12878	Cell	2	Unstranded	Paired-end	2x75	44178498	GSM958742
Human	ENCODE	Cell_line	GM12878	Cell	1	Stranded	Single-end	1x75	17661281	GSM958730
Human	ENCODE	Cell_line	GM12878	Cell	2	Stranded	Single-end	1x75	28798965	GSM958730
Human	ENCODE	Cell_line	GM12878	Cell	2	Stranded	Paired-end	2x76	271247661	GSM758559
Human	ENCODE	Cell_line	GM12878	Cytosol	1	Stranded	Paired-end	2x76	265449217	GSM758560
Human	ENCODE	Cell_line	GM12878	Cytosol	2	Stranded	Paired-end	2x76	200054444	GSM758560
Human	ENCODE	Cell_line	GM12891	Cell	1	Unstranded	Paired-end	2x75	136532294	GSM958747
Human	ENCODE	Cell_line	GM12891	Cell	2	Unstranded	Paired-end	2x75	48917094	GSM958747
Human	ENCODE	Cell_line	GM12892	Cell	1	Unstranded	Paired-end	2x75	113393019	GSM958748
Human	ENCODE	Cell_line	GM12892	Cell	2	Unstranded	Paired-end	2x75	54228558	GSM958748
Human	ENCODE	Cell_line	GM12892	Cell	3	Unstranded	Paired-end	2x75	57407880	GSM958748
Human	ENCODE	Cell_line	H1-hESC	Cell	1	Unstranded	Paired-end	2x75	80360857	GSM958733
Human	ENCODE	Cell_line	H1-hESC	Cell	2	Unstranded	Paired-end	2x75	82751262	GSM958733
Human	ENCODE	Cell_line	H1-hESC	Cell	3	Unstranded	Paired-end	2x75	80251895	GSM958733
Human	ENCODE	Cell_line	H1-hESC	Cell	4	Unstranded	Paired-end	2x75	58843558	GSM958733
Human	ENCODE	Cell_line	H1-hESC	Cell	1	Unstranded	Paired-end	2x75	65905139	GSM958743
Human	ENCODE	Cell_line	H1-hESC	Cell	1	Stranded	Single-end	1x75	17526213	GSM958737
Human	ENCODE	Cell_line	H1-hESC	Cell	2	Stranded	Single-end	1x75	29460554	GSM958737
Human	ENCODE	Cell_line	H1-hESC	Cell	1	Stranded	Paired-end	2x76	264935266	GSM758566
Human	ENCODE	Cell_line	H1-hESC	Cell	2	Stranded	Paired-end	2x76	220806512	GSM758566
Human	ENCODE	Cell_line	HeLa-S3	Cell	1	Unstranded	Paired-end	2x75	64136653	GSM958735
Human	ENCODE	Cell_line	HeLa-S3	Cell	2	Unstranded	Paired-end	2x75	96485839	GSM958735
Human	ENCODE	Cell_line	HeLa-S3	Cell	1	Stranded	Single-end	1x75	11479118	GSM958739
Human	ENCODE	Cell_line	HeLa-S3	Cell	2	Stranded	Single-end	1x75	13812168	GSM958739
Human	ENCODE	Cell_line	HeLa-S3	Cell	1	Stranded	Paired-end	2x76	213931900	GSM765402
Human	ENCODE	Cell_line	HeLa-S3	Cell	2	Stranded	Paired-end	2x76	238876600	GSM765402
Human	ENCODE	Cell_line	HeLa-S3	Cytosol	2	Stranded	Paired-end	2x76	214245057	GSM765404
Human	ENCODE	Cell_line	HepG2	Cell	1	Unstranded	Paired-end	2x75	105152569	GSM958732
Human	ENCODE	Cell_line	HepG2	Cell	2	Unstranded	Paired-end	2x75	124409360	GSM958732
Human	ENCODE	Cell_line	HepG2	Cell	1	Stranded	Single-end	1x75	26397505	GSM958740
Human	ENCODE	Cell_line	HepG2	Cell	2	Stranded	Single-end	1x75	18454361	GSM958740
Human	ENCODE	Cell_line	HepG2	Cell	1	Stranded	Paired-end	2x76	253486441	GSM758575
Human	ENCODE	Cell_line	HepG2	Cell	2	Stranded	Paired-end	2x76	248020647	GSM758575
Human	ENCODE	Cell_line	HSMM	Cell	1	Unstranded	Paired-end	2x75	126360079	GSM958744
Human	ENCODE	Cell_line	HSMM	Cell	2	Unstranded	Paired-end	2x75	127170649	GSM958744
Human	ENCODE	Cell_line	HSMM	Cell	1	Stranded	Paired-end	2x76	233475212	GSM758578
Human	ENCODE	Cell_line	HSMM	Cell	2	Stranded	Paired-end	2x76	259919031	GSM758578
Human	ENCODE	Cell_line	HUVEC	Cell	1	Unstranded	Paired-end	2x75	96559620	GSM958734
Human	ENCODE	Cell_line	HUVEC	Cell	2	Unstranded	Paired-end	2x75	71088576	GSM958734
Human	ENCODE	Cell_line	HUVEC	Cell	1	Stranded	Single-end	1x75	24711212	GSM958738
Human	ENCODE	Cell_line	HUVEC	Cell	2	Stranded	Single-end	1x75	10132452	GSM958738
Human	ENCODE	Cell_line	HUVEC	Cell	1	Stranded	Paired-end	2x76	179646378	GSM758563
Human	ENCODE	Cell_line	HUVEC	Cell	2	Stranded	Paired-end	2x76	219903726	GSM758563
Human	ENCODE	Cell_line	IMR90	Cell	1	Stranded	Paired-end	2x101	218651466	GSM981249
Human	ENCODE	Cell_line	IMR90	Cell	2	Stranded	Paired-end	2x101	148666192	GSM981249
Human	ENCODE	Cell_line	K562	Cell	1	Unstranded	Paired-end	2x75	174174736	GSM958729
Human	ENCODE	Cell_line	K562	Cell	2	Unstranded	Paired-end	2x75	154856547	GSM958729
Human	ENCODE	Cell_line	K562	Cell	1	Stranded	Single-end	1x75	26055173	GSM958731
Human	ENCODE	Cell_line	K562	Cell	2	Stranded	Single-end	1x75	23033518	GSM958731
Human	ENCODE	Cell_line	K562	Cell	1	Stranded	Paired-end	2x76	226775722	GSM765405
Human	ENCODE	Cell_line	K562	Cell	2	Stranded	Paired-end	2x76	242991821	GSM765405
Human	ENCODE	Cell_line	MCF7	Cell	1	Unstranded	Paired-end	2x75	133680659	GSM958745
Human	ENCODE	Cell_line	MCF7	Cell	2	Unstranded	Paired-end	2x75	114159354	GSM958745
Human	ENCODE	Cell_line	MCF7	Cell	3	Unstranded	Paired-end	2x75	130865477	GSM958745
Human	ENCODE	Cell_line	MCF-7	Cell	2	Stranded	Paired-end	2x76	268722914	GSM765388
Human	ENCODE	Cell_line	MCF-7	Cytosol	3	Stranded	Paired-end	2x101	328172477	GSM981252
Human	ENCODE	Cell_line	MCF-7	Cytosol	4	Stranded	Paired-end	2x101	313493023	GSM981252
Human	ENCODE	Cell_line	Monocytes-CD14+	Cell	1	Stranded	Paired-end	2x76	232101809	GSM984609
Human	ENCODE	Cell_line	Monocytes-CD14+	Cell	2	Stranded	Paired-end	2x76	165628882	GSM984609
Human	ENCODE	Cell_line	NHEK	Cell	1	Unstranded	Paired-end	2x75	99230476	GSM958736
Human	ENCODE	Cell_line	NHEK	Cell	2	Unstranded	Paired-end	2x75	116530921	GSM958736
Human	ENCODE	Cell_line	NHEK	Cell	1	Stranded	Single-end	1x75	25497671	GSM958741
Human	ENCODE	Cell_line	NHEK	Cell	1	Stranded	Paired-end	2x76	284710913	GSM765401
Human	ENCODE	Cell_line	NHEK	Cell	2	Stranded	Paired-end	2x76	278977465	GSM765401
Human	ENCODE	Cell_line	NHEK	Cell	5	Stranded	Paired-end	2x76	274275497	GSM765401
Human	ENCODE	Cell_line	NHLF	Cell	1	Unstranded	Paired-end	2x75	112307050	GSM958746
Human	ENCODE	Cell_line	NHLF	Cell	2	Unstranded	Paired-end	2x75	105126894	GSM958746
Human	ENCODE	Cell_line	NHLF	Cell	1	Stranded	Paired-end	2x76	273534130	GSM765394
Human	ENCODE	Cell_line	NHLF	Cell	2	Stranded	Paired-end	2x76	275125563	GSM765394
Human	ENCODE	Cell_line	SK-N-SH	Cell	3	Stranded	Paired-end	2x101	282224544	GSM981253
Human	ENCODE	Cell_line	SK-N-SH	Cell	4	Stranded	Paired-end	2x101	203235215	GSM981253
Human	GEO	Cell_line	GM12891	Cell	1	Stranded	Paired-end	2x101	60536742	GSM1609430
Human	GEO	Cell_line	GM12891	Cell	2	Stranded	Paired-end	2x101	55273240	GSM1609431
Human	GEO	Cell_line	GM12891	Cell	3	Stranded	Paired-end	2x101	50068341	GSM1609432
Human	GEO	Cell_line	GM12892	Cell	1	Stranded	Paired-end	2x101	63286605	GSM1609433
Human	GEO	Cell_line	GM12892	Cell	2	Stranded	Paired-end	2x101	65474697	GSM1609434
Human	GEO	Cell_line	GM12892	Cell	3	Stranded	Paired-end	2x101	51796869	GSM1609435
Human	BodyMap	Tissue	Adipose		1	Unstranded	Single-end	1x75	77454182	GSM759490
Human	BodyMap	Tissue	Adipose		1	Unstranded	Paired-end	2x50	144261309	GSM759491
Human	BodyMap	Tissue	Adrenal		1	Unstranded	Single-end	1x75	78509876	GSM759492
Human	BodyMap	Tissue	Adrenal		1	Unstranded	Paired-end	2x50	140283307	GSM759493
Human	BodyMap	Tissue	Brain		1	Unstranded	Single-end	1x75	64519802	GSM759494
Human	BodyMap	Tissue	Brain		1	Unstranded	Paired-end	2x50	140252981	GSM759495
Human	BodyMap	Tissue	Breast		1	Unstranded	Single-end	1x75	63199536	GSM759496
Human	BodyMap	Tissue	Breast		1	Unstranded	Paired-end	2x50	141573247	GSM759497
Human	BodyMap	Tissue	Colon		1	Unstranded	Single-end	1x75	45221568	GSM759498
Human	BodyMap	Tissue	Colon		1	Unstranded	Paired-end	2x50	159551215	GSM759499
Human	BodyMap	Tissue	Heart		1	Unstranded	Single-end	1x75	79853265	GSM759500
Human	BodyMap	Tissue	Heart		1	Unstranded	Paired-end	2x50	166378779	GSM759501
Human	BodyMap	Tissue	Kidney		1	Unstranded	Single-end	1x75	96578819	GSM759502
Human	BodyMap	Tissue	Kidney		1	Unstranded	Paired-end	2x50	149653225	GSM759503
Human	BodyMap	Tissue	Liver		1	Unstranded	Single-end	1x75	88474991	GSM759504
Human	BodyMap	Tissue	Liver		1	Unstranded	Paired-end	2x50	157757053	GSM759505
Human	BodyMap	Tissue	Lung		1	Unstranded	Single-end	1x75	86405440	GSM759506
Human	BodyMap	Tissue	Lung		1	Unstranded	Paired-end	2x50	153637049	GSM759507
Human	BodyMap	Tissue	Lymph node		1	Unstranded	Single-end	1x75	80411413	GSM759508
Human	BodyMap	Tissue	Lymph node		1	Unstranded	Paired-end	2x50	159631076	GSM759509
Human	BodyMap	Tissue	Ovary		1	Unstranded	Single-end	1x75	85029550	GSM759510
Human	BodyMap	Tissue	Ovary		1	Unstranded	Paired-end	2x50	155012939	GSM759511
Human	BodyMap	Tissue	Prostate		1	Unstranded	Single-end	1x75	89785611	GSM759512
Human	BodyMap	Tissue	Prostate		1	Unstranded	Paired-end	2x50	161609839	GSM759513
Human	BodyMap	Tissue	Skeletal muscle		1	Unstranded	Single-end	1x75	93383508	GSM759514
Human	BodyMap	Tissue	Skeletal muscle		1	Unstranded	Paired-end	2x50	158011942	GSM759515
Human	BodyMap	Tissue	Testes		1	Unstranded	Single-end	1x75	94987015	GSM759516
Human	BodyMap	Tissue	Testes		1	Unstranded	Paired-end	2x50	156408435	GSM759517
Human	BodyMap	Tissue	Thyroid		1	Unstranded	Single-end	1x75	81820437	GSM759518
Human	BodyMap	Tissue	Thyroid		1	Unstranded	Paired-end	2x50	153367085	GSM759519
Human	BodyMap	Tissue	White blood cells		1	Unstranded	Single-end	1x75	76273068	GSM759520
Human	BodyMap	Tissue	White blood cells		1	Unstranded	Paired-end	2x50	158914454	GSM759521
Human	BodyMap	Tissue	16 Tissues mixture		1	Stranded	Single-end	1x100	35780486	GSM759522
Human	BodyMap	Tissue	16 Tissues mixture		1	Stranded	Single-end	1x100	36532143	GSM759523
Human	BodyMap	Tissue	16 Tissues mixture		1	Stranded	Single-end	1x100	35393013	GSM759524
Human	BodyMap	Tissue	16 Tissues mixture		1	Stranded	Single-end	1x100	36239024	GSM759525
Human	BodyMap	Tissue	16 Tissues mixture		1	Stranded	Single-end	1x100	35766720	GSM759526
Human	GTEx	Tissue	Brain cerebellum		1	Unstranded	Paired-end	2x76	32375702	GTEX-111FC-3326-SM-5GZYV
Human	GTEx	Tissue	Brain cerebellum		1	Unstranded	Paired-end	2x76	29644213	GTEX-1128S-2826-SM-5N9DI
Human	GTEx	Tissue	Brain cerebellum		1	Unstranded	Paired-end	2x76	28025997	GTEX-117XS-3126-SM-5GIDP
Human	GTEx	Tissue	Brain cerebellum		1	Unstranded	Paired-end	2x76	31436973	GTEX-1192X-3226-SM-5987D
Human	GTEx	Tissue	Brain cerebellum		1	Unstranded	Paired-end	2x76	30851987	GTEX-11DXW-1026-SM-5H11K
Human	GTEx	Tissue	Brain cerebellum		1	Unstranded	Paired-end	2x76	41083452	GTEX-11DXY-3126-SM-5N9BT
Human	GTEx	Tissue	Brain cerebellum		1	Unstranded	Paired-end	2x76	37070172	GTEX-11DYG-2926-SM-5H132
Human	GTEx	Tissue	Brain cerebellum		1	Unstranded	Paired-end	2x76	32464257	GTEX-11DZ1-2926-SM-5A5KI
Human	GTEx	Tissue	Brain cerebellum		1	Unstranded	Paired-end	2x76	35164342	GTEX-11EI6-2926-SM-5985U
Human	GTEx	Tissue	Brain cerebellum		1	Unstranded	Paired-end	2x76	41040170	GTEX-11EMC-3326-SM-5P9JH
Human	GTEx	Tissue	Brain cerebellum		1	Unstranded	Paired-end	2x76	33128299	GTEX-11EQ8-2826-SM-5N9C1
Human	GTEx	Tissue	Brain cerebellum		1	Unstranded	Paired-end	2x76	36185991	GTEX-11GSO-3026-SM-5Q5AL
Human	GTEx	Tissue	Brain cerebellum		1	Unstranded	Paired-end	2x76	37757926	GTEX-11GSP-3126-SM-5A5LL
Human	GTEx	Tissue	Brain cerebellum		1	Unstranded	Paired-end	2x76	32652985	GTEX-11NUK-3026-SM-5986K
Human	GTEx	Tissue	Brain cerebellum		1	Unstranded	Paired-end	2x76	28387565	GTEX-11NV4-2226-SM-5BC4T
Human	GTEx	Tissue	Brain cerebellum		1	Unstranded	Paired-end	2x76	36100651	GTEX-11O72-2826-SM-5HL6W
Human	GTEx	Tissue	Brain cerebellum		1	Unstranded	Paired-end	2x76	29313952	GTEX-11OC5-0626-SM-5HL6M
Human	GTEx	Tissue	Brain cerebellum		1	Unstranded	Paired-end	2x76	27471588	GTEX-11OF3-3126-SM-5GU5E
Human	GTEx	Tissue	Brain cerebellum		1	Unstranded	Paired-end	2x76	32753103	GTEX-11ONC-3026-SM-5985W
Human	GTEx	Tissue	Brain cerebellum		1	Unstranded	Paired-end	2x76	30088451	GTEX-11PRG-2826-SM-5BC54
Human	GTEx	Tissue	Brain cerebellum		1	Unstranded	Paired-end	2x76	32444858	GTEX-11TTK-2826-SM-5GU5K
Human	GTEx	Tissue	Brain cerebellum		1	Unstranded	Paired-end	2x76	26567371	GTEX-11WQK-3126-SM-5EGI2
Human	GTEx	Tissue	Brain cerebellum		1	Unstranded	Paired-end	2x76	31534710	GTEX-11ZTS-3226-SM-5EGID
Human	GTEx	Tissue	Brain cerebellum		1	Unstranded	Paired-end	2x76	45558134	GTEX-11ZUS-2826-SM-5EQKW
Human	GTEx	Tissue	Brain cerebellum		1	Unstranded	Paired-end	2x76	40177102	GTEX-11ZVC-3026-SM-59HJM
Human	GTEx	Tissue	Brain cerebellum		1	Unstranded	Paired-end	2x76	35533916	GTEX-12126-0926-SM-5FQTW
Human	GTEx	Tissue	Brain cerebellum		1	Unstranded	Paired-end	2x76	28988887	GTEX-12696-3026-SM-5FQTU
Human	GTEx	Tissue	Brain cerebellum		1	Unstranded	Paired-end	2x76	26036378	GTEX-1269C-3126-SM-5EGI6
Human	GTEx	Tissue	Brain cerebellum		1	Unstranded	Paired-end	2x76	30217898	GTEX-12WS9-2826-SM-5FQU9
Human	GTEx	Tissue	Brain cerebellum		1	Unstranded	Paired-end	2x76	25644774	GTEX-12WSB-3026-SM-59HKM
Human	GTEx	Tissue	Brain cerebellum		1	Unstranded	Paired-end	2x76	35398555	GTEX-12WSC-2926-SM-5BC5Z
Human	GTEx	Tissue	Brain cerebellum		1	Unstranded	Paired-end	2x76	41870839	GTEX-12WSD-3026-SM-5LZU7
Human	GTEx	Tissue	Brain cerebellum		1	Unstranded	Paired-end	2x76	32000326	GTEX-12WSE-2926-SM-5RQJ9
Human	GTEx	Tissue	Brain cerebellum		1	Unstranded	Paired-end	2x76	28445504	GTEX-12WSH-3126-SM-5LZW8
Human	GTEx	Tissue	Brain cerebellum		1	Unstranded	Paired-end	2x76	26612284	GTEX-12WSM-2126-SM-5GCOC
Human	GTEx	Tissue	Brain cerebellum		1	Unstranded	Paired-end	2x76	36999452	GTEX-12ZZX-2826-SM-5BC6K
Human	GTEx	Tissue	Brain cerebellum		1	Unstranded	Paired-end	2x76	32984539	GTEX-12ZZY-2926-SM-5DUXO
Human	GTEx	Tissue	Brain cerebellum		1	Unstranded	Paired-end	2x76	37516711	GTEX-12ZZZ-3126-SM-5LZU6
Human	GTEx	Tissue	Brain cerebellum		1	Unstranded	Paired-end	2x76	26937589	GTEX-13112-2926-SM-5DUWT
Human	GTEx	Tissue	Brain cerebellum		1	Unstranded	Paired-end	2x76	31495092	GTEX-1313W-3026-SM-5LZUZ
Human	GTEx	Tissue	Brain cerebellum		1	Unstranded	Paired-end	2x76	37468308	GTEX-131XH-2926-SM-5LZU4
Human	GTEx	Tissue	Brain cerebellum		1	Unstranded	Paired-end	2x76	34093727	GTEX-131YS-3026-SM-5EGHY
Human	GTEx	Tissue	Brain cerebellum		1	Unstranded	Paired-end	2x76	34932758	GTEX-132Q8-2926-SM-5IFFP
Human	GTEx	Tissue	Brain cerebellum		1	Unstranded	Paired-end	2x76	40337009	GTEX-1399T-3126-SM-5IJFS
Human	GTEx	Tissue	Brain cerebellum		1	Unstranded	Paired-end	2x76	38844557	GTEX-139TS-3126-SM-5LZWX
Human	GTEx	Tissue	Brain cerebellum		1	Unstranded	Paired-end	2x76	38339942	GTEX-139TT-2626-SM-5LZUB
Human	GTEx	Tissue	Brain cerebellum		1	Unstranded	Paired-end	2x76	39512901	GTEX-139UC-3226-SM-5N9EZ
Human	GTEx	Tissue	Brain cerebellum		1	Unstranded	Paired-end	2x76	38398787	GTEX-13CF2-3026-SM-5IFFX
Human	GTEx	Tissue	Brain cerebellum		1	Unstranded	Paired-end	2x76	29651272	GTEX-13FHO-2926-SM-5L3ES
Human	GTEx	Tissue	Brain cerebellum		1	Unstranded	Paired-end	2x76	39177556	GTEX-13FHP-2926-SM-5IJG9
Human	GTEx	Tissue	Brain cerebellum		1	Unstranded	Paired-end	2x76	29975307	GTEX-13FXS-3026-SM-5LZYO
Human	GTEx	Tissue	Brain cerebellum		1	Unstranded	Paired-end	2x76	44279335	GTEX-13G51-3126-SM-5IJG7
Human	GTEx	Tissue	Brain cerebellum		1	Unstranded	Paired-end	2x76	27938631	GTEX-13JUV-3026-SM-5K7WX
Human	GTEx	Tissue	Brain cerebellum		1	Unstranded	Paired-end	2x76	47707495	GTEX-13JVG-3226-SM-5IJGJ
Human	GTEx	Tissue	Brain cerebellum		1	Unstranded	Paired-end	2x76	48883905	GTEX-13N2G-3126-SM-5IJGL
Human	GTEx	Tissue	Brain cerebellum		1	Unstranded	Paired-end	2x76	32471163	GTEX-13NYB-3226-SM-5J2ND
Human	GTEx	Tissue	Brain cerebellum		1	Unstranded	Paired-end	2x76	29470766	GTEX-13NZ8-3026-SM-5L3D4
Human	GTEx	Tissue	Brain cerebellum		1	Unstranded	Paired-end	2x76	37221041	GTEX-13O3O-3026-SM-5KM42
Human	GTEx	Tissue	Brain cerebellum		1	Unstranded	Paired-end	2x76	43004634	GTEX-13O3Q-3026-SM-5IJGD
Human	GTEx	Tissue	Brain cerebellum		1	Unstranded	Paired-end	2x76	40808562	GTEX-13OVH-2926-SM-5IJFH
Human	GTEx	Tissue	Brain cerebellum		1	Unstranded	Paired-end	2x76	43007496	GTEX-13OVJ-2726-SM-5IJG6
Human	GTEx	Tissue	Brain cerebellum		1	Unstranded	Paired-end	2x76	41234490	GTEX-13OVL-3026-SM-5IJF1
Human	GTEx	Tissue	Brain cerebellum		1	Unstranded	Paired-end	2x76	42411503	GTEX-13OW5-3126-SM-5MR3Y
Human	GTEx	Tissue	Brain cerebellum		1	Unstranded	Paired-end	2x76	35235023	GTEX-13OW6-2926-SM-5KM29
Human	GTEx	Tissue	Brain cerebellum		1	Unstranded	Paired-end	2x76	39659824	GTEX-13OW7-2926-SM-5MR3Z
Human	GTEx	Tissue	Brain cerebellum		1	Unstranded	Paired-end	2x76	36869311	GTEX-13OW8-2926-SM-5L3FV
Human	GTEx	Tissue	Brain cerebellum		1	Unstranded	Paired-end	2x76	54521170	GTEX-13PDP-2926-SM-5N9E8
Human	GTEx	Tissue	Brain cerebellum		1	Unstranded	Paired-end	2x76	26466496	GTEX-13PVQ-2926-SM-5L3HJ
Human	GTEx	Tissue	Brain cerebellum		1	Unstranded	Paired-end	2x76	31646888	GTEX-13QIC-3026-SM-5LU58
Human	GTEx	Tissue	Brain cerebellum		1	Unstranded	Paired-end	2x76	25388072	GTEX-13RTJ-3126-SM-5S2Q4
Human	GTEx	Tissue	Brain cerebellum		1	Unstranded	Paired-end	2x76	25402621	GTEX-13S7M-3026-SM-5S2QQ
Human	GTEx	Tissue	Brain cerebellum		1	Unstranded	Paired-end	2x76	33819980	GTEX-13VXU-3026-SM-5LU3K
Human	GTEx	Tissue	Brain cerebellum		1	Unstranded	Paired-end	2x76	29692709	GTEX-13X6I-2926-SM-5Q5C3
Human	GTEx	Tissue	Brain cerebellum		1	Unstranded	Paired-end	2x76	53101736	GTEX-13X6K-2826-SM-5O9DS
Human	GTEx	Tissue	Brain cerebellum		1	Unstranded	Paired-end	2x76	36080849	GTEX-144GL-2926-SM-5O99F
Human	GTEx	Tissue	Brain cerebellum		1	Unstranded	Paired-end	2x76	29465772	GTEX-145LS-3026-SM-5O99S
Human	GTEx	Tissue	Brain cerebellum		1	Unstranded	Paired-end	2x76	28542899	GTEX-145LU-2626-SM-5LU9Z
Human	GTEx	Tissue	Brain cerebellum		1	Unstranded	Paired-end	2x76	34261872	GTEX-145MG-3126-SM-5Q5D3
Human	GTEx	Tissue	Brain cerebellum		1	Unstranded	Paired-end	2x76	39196770	GTEX-145MH-2926-SM-5Q5D2
Human	GTEx	Tissue	Brain cerebellum		1	Unstranded	Paired-end	2x76	29731451	GTEX-145MI-3126-SM-5Q5CF
Human	GTEx	Tissue	Brain cerebellum		1	Unstranded	Paired-end	2x76	33680866	GTEX-147F4-3026-SM-5Q5BJ
Human	GTEx	Tissue	Brain cerebellum		1	Unstranded	Paired-end	2x76	33921464	GTEX-14A5I-2826-SM-5SIBF
Human	GTEx	Tissue	Brain cerebellum		1	Unstranded	Paired-end	2x76	38896064	GTEX-14ASI-2926-SM-5Q5DG
Human	GTEx	Tissue	Brain cerebellum		1	Unstranded	Paired-end	2x76	39371622	GTEX-14BIM-3126-SM-5Q5C7
Human	GTEx	Tissue	Brain cerebellum		1	Unstranded	Paired-end	2x76	40050523	GTEX-14BIN-3326-SM-5Q5E6
Human	GTEx	Tissue	Brain cerebellum		1	Unstranded	Paired-end	2x76	33351547	GTEX-14C5O-2926-SM-5RQI1
Human	GTEx	Tissue	Brain cerebellum		1	Unstranded	Paired-end	2x76	23778304	GTEX-14DAQ-3026-SM-5S2QZ
Human	GTEx	Tissue	Brain cerebellum		1	Unstranded	Paired-end	2x76	23796267	GTEX-14E7W-2926-SM-5S2R8
Human	GTEx	Tissue	Brain cerebellum		1	Unstranded	Paired-end	2x76	14426854	GTEX-N7MS-2526-SM-26GMA
Human	GTEx	Tissue	Brain cerebellum		2	Unstranded	Paired-end	2x76	19600530	GTEX-N7MS-2526-SM-26GMR
Human	GTEx	Tissue	Brain cerebellum		3	Unstranded	Paired-end	2x76	21887306	GTEX-N7MS-2526-SM-2D7W3
Human	GTEx	Tissue	Brain cerebellum		1	Unstranded	Paired-end	2x76	14728117	GTEX-N7MT-1226-SM-26GMC
Human	GTEx	Tissue	Brain cerebellum		2	Unstranded	Paired-end	2x76	23206066	GTEX-N7MT-1226-SM-26GMT
Human	GTEx	Tissue	Brain cerebellum		3	Unstranded	Paired-end	2x76	27663650	GTEX-N7MT-1226-SM-2D7W4
Human	GTEx	Tissue	Brain cerebellum		4	Unstranded	Paired-end	2x76	24613764	GTEX-N7MT-1226-SM-2TC6K
Human	GTEx	Tissue	Brain cerebellum		1	Unstranded	Paired-end	2x76	42284108	GTEX-NPJ7-2826-SM-2I3FU
Human	GTEx	Tissue	Brain cerebellum		1	Unstranded	Paired-end	2x76	11615635	GTEX-NPJ8-2626-SM-26GMI
Human	GTEx	Tissue	Brain cerebellum		2	Unstranded	Paired-end	2x76	19738916	GTEX-NPJ8-2626-SM-26GMZ
Human	GTEx	Tissue	Brain cerebellum		3	Unstranded	Paired-end	2x76	26437967	GTEX-NPJ8-2626-SM-2D7W2
Human	GTEx	Tissue	Brain cerebellum		1	Unstranded	Paired-end	2x76	40001828	GTEX-P44H-2426-SM-2XCEJ
Human	GTEx	Tissue	Brain cerebellum		1	Unstranded	Paired-end	2x76	57502242	GTEX-PVOW-2626-SM-32PL8
Human	GTEx	Tissue	Brain cerebellum		1	Unstranded	Paired-end	2x76	27253613	GTEX-Q2AG-2826-SM-2HMJQ
Human	GTEx	Tissue	Brain cerebellum		1	Unstranded	Paired-end	2x76	48104108	GTEX-QDT8-3026-SM-32PKB
Human	GTEx	Tissue	Brain cerebellum		1	Unstranded	Paired-end	2x76	66755872	GTEX-QMR6-1326-SM-32PLB
Human	GTEx	Tissue	Brain cerebellum		1	Unstranded	Paired-end	2x76	25976548	GTEX-QVJO-1325-SM-2S1QX
Human	GTEx	Tissue	Brain cerebellum		1	Unstranded	Paired-end	2x76	31241836	GTEX-QVUS-2926-SM-3GIJB
Human	GTEx	Tissue	Brain cerebellum		1	Unstranded	Paired-end	2x76	33329858	GTEX-R55E-2526-SM-2TC6H
Human	GTEx	Tissue	Brain cerebellum		1	Unstranded	Paired-end	2x76	23564951	GTEX-R55F-1226-SM-2TF59
Human	GTEx	Tissue	Brain cerebellum		1	Unstranded	Paired-end	2x76	36419058	GTEX-RNOR-2226-SM-2TF5O
Human	GTEx	Tissue	Brain cerebellum		1	Unstranded	Paired-end	2x76	25582638	GTEX-RU72-2926-SM-2TF66
Human	GTEx	Tissue	Brain cerebellum		1	Unstranded	Paired-end	2x76	37715643	GTEX-S7SE-2526-SM-2XCDL
Human	GTEx	Tissue	Brain cerebellum		1	Unstranded	Paired-end	2x76	43964202	GTEX-T2IS-2926-SM-32QPO
Human	GTEx	Tissue	Brain cerebellum		1	Unstranded	Paired-end	2x76	39263765	GTEX-T5JC-2326-SM-32PMR
Human	GTEx	Tissue	Brain cerebellum		1	Unstranded	Paired-end	2x76	38464009	GTEX-T6MN-2526-SM-32PMN
Human	GTEx	Tissue	Brain cerebellum		1	Unstranded	Paired-end	2x76	62963874	GTEX-TSE9-2926-SM-3DB77
Human	GTEx	Tissue	Brain cerebellum		1	Unstranded	Paired-end	2x76	50434508	GTEX-UTHO-2926-SM-3P5Z9
Human	GTEx	Tissue	Brain cerebellum		1	Unstranded	Paired-end	2x76	47284769	GTEX-WHSE-2926-SM-3NMBG
Human	GTEx	Tissue	Brain cerebellum		1	Unstranded	Paired-end	2x76	32391121	GTEX-WL46-2826-SM-3LK81
Human	GTEx	Tissue	Brain cerebellum		1	Unstranded	Paired-end	2x76	46687183	GTEX-WVLH-2926-SM-3MJG5
Human	GTEx	Tissue	Brain cerebellum		1	Unstranded	Paired-end	2x76	51066942	GTEX-WWYW-3026-SM-3NB36
Human	GTEx	Tissue	Brain cerebellum		1	Unstranded	Paired-end	2x76	47734215	GTEX-WZTO-2826-SM-3NM8P
Human	GTEx	Tissue	Brain cerebellum		1	Unstranded	Paired-end	2x76	26937112	GTEX-X261-3126-SM-4PQZC
Human	GTEx	Tissue	Brain cerebellum		1	Unstranded	Paired-end	2x76	39481122	GTEX-X4EP-3026-SM-3P5YP
Human	GTEx	Tissue	Brain cerebellum		1	Unstranded	Paired-end	2x76	56066659	GTEX-X4XX-2926-SM-3NMB1
Human	GTEx	Tissue	Brain cerebellum		1	Unstranded	Paired-end	2x76	24944906	GTEX-XLM4-2926-SM-4AT59
Human	GTEx	Tissue	Brain cerebellum		1	Unstranded	Paired-end	2x76	30612344	GTEX-XMD1-2826-SM-4AT5F
Human	GTEx	Tissue	Brain cerebellum		1	Unstranded	Paired-end	2x76	45831535	GTEX-XOTO-2926-SM-4B65G
Human	GTEx	Tissue	Brain cerebellum		1	Unstranded	Paired-end	2x76	43486132	GTEX-Y111-2826-SM-4TT3O
Human	GTEx	Tissue	Brain cerebellum		1	Unstranded	Paired-end	2x76	42975315	GTEX-Y8DK-0726-SM-4TT3S
Human	GTEx	Tissue	Brain cerebellum		1	Unstranded	Paired-end	2x76	34586139	GTEX-YFC4-3026-SM-5IFJK
Human	GTEx	Tissue	Brain cerebellum		1	Unstranded	Paired-end	2x76	58225449	GTEX-YJ89-2926-SM-5P9IT
Human	GTEx	Tissue	Brain cerebellum		1	Unstranded	Paired-end	2x76	47653447	GTEX-Z93S-2826-SM-57WBL
Human	GTEx	Tissue	Brain cerebellum		1	Unstranded	Paired-end	2x76	39377782	GTEX-ZAB4-2926-SM-57WCV
Human	GTEx	Tissue	Brain cerebellum		1	Unstranded	Paired-end	2x76	34688467	GTEX-ZAJG-3026-SM-5HL92
Human	GTEx	Tissue	Brain cerebellum		1	Unstranded	Paired-end	2x76	31824514	GTEX-ZAK1-2926-SM-5HL9S
Human	GTEx	Tissue	Brain cerebellum		1	Unstranded	Paired-end	2x76	30899618	GTEX-ZDXO-2926-SM-4WKFM
Human	GTEx	Tissue	Brain cerebellum		1	Unstranded	Paired-end	2x76	39810130	GTEX-ZF28-2926-SM-4WKG1
Human	GTEx	Tissue	Brain cerebellum		1	Unstranded	Paired-end	2x76	35438204	GTEX-ZUA1-2926-SM-59HL3
Human	GTEx	Tissue	Brain cerebellum		1	Unstranded	Paired-end	2x76	32035022	GTEX-ZVT3-2926-SM-5GU6M
Human	GTEx	Tissue	Brain cerebellum		1	Unstranded	Paired-end	2x76	49468210	GTEX-ZYFD-2926-SM-5GID9
Human	GTEx	Tissue	Brain cerebellum		1	Unstranded	Paired-end	2x76	36632508	GTEX-ZYY3-3026-SM-5GIEJ
Human	GTEx	Tissue	Brain cerebellum		1	Unstranded	Paired-end	2x76	27240519	GTEX-ZZPT-2926-SM-5EQ5S
Human	GTEx	Tissue	Brain cortex		1	Unstranded	Paired-end	2x76	36644973	GTEX-1117F-3226-SM-5N9CT
Human	GTEx	Tissue	Brain cortex		1	Unstranded	Paired-end	2x76	41407167	GTEX-111FC-3126-SM-5GZZ2
Human	GTEx	Tissue	Brain cortex		1	Unstranded	Paired-end	2x76	40402403	GTEX-1128S-2726-SM-5H12C
Human	GTEx	Tissue	Brain cortex		1	Unstranded	Paired-end	2x76	48063641	GTEX-117XS-3026-SM-5N9CA
Human	GTEx	Tissue	Brain cortex		1	Unstranded	Paired-end	2x76	31277038	GTEX-117YW-2926-SM-5GIEQ
Human	GTEx	Tissue	Brain cortex		1	Unstranded	Paired-end	2x76	33986975	GTEX-1192X-3126-SM-5N9BY
Human	GTEx	Tissue	Brain cortex		1	Unstranded	Paired-end	2x76	43759087	GTEX-11DXW-1126-SM-5H12Q
Human	GTEx	Tissue	Brain cortex		1	Unstranded	Paired-end	2x76	30928995	GTEX-11DXY-3226-SM-5GIDE
Human	GTEx	Tissue	Brain cortex		1	Unstranded	Paired-end	2x76	44326614	GTEX-11EI6-3026-SM-5GZZO
Human	GTEx	Tissue	Brain cortex		1	Unstranded	Paired-end	2x76	34668833	GTEX-11EMC-3226-SM-5EGKW
Human	GTEx	Tissue	Brain cortex		1	Unstranded	Paired-end	2x76	31793635	GTEX-11GS4-3126-SM-5A5LH
Human	GTEx	Tissue	Brain cortex		1	Unstranded	Paired-end	2x76	27987438	GTEX-11GSO-2926-SM-5HL73
Human	GTEx	Tissue	Brain cortex		1	Unstranded	Paired-end	2x76	34561671	GTEX-11GSP-3226-SM-5986O
Human	GTEx	Tissue	Brain cortex		1	Unstranded	Paired-end	2x76	41797649	GTEX-11NUK-2926-SM-5A5MD
Human	GTEx	Tissue	Brain cortex		1	Unstranded	Paired-end	2x76	29770652	GTEX-11NV4-2126-SM-5N9DS
Human	GTEx	Tissue	Brain cortex		1	Unstranded	Paired-end	2x76	32214218	GTEX-11O72-2926-SM-5BC4V
Human	GTEx	Tissue	Brain cortex		1	Unstranded	Paired-end	2x76	43330275	GTEX-11OC5-0726-SM-5P9JK
Human	GTEx	Tissue	Brain cortex		1	Unstranded	Paired-end	2x76	35458627	GTEX-11OF3-2926-SM-5HL78
Human	GTEx	Tissue	Brain cortex		1	Unstranded	Paired-end	2x76	44233748	GTEX-11ONC-2926-SM-5P9JM
Human	GTEx	Tissue	Brain cortex		1	Unstranded	Paired-end	2x76	32805330	GTEX-11PRG-2926-SM-5987A
Human	GTEx	Tissue	Brain cortex		1	Unstranded	Paired-end	2x76	42717816	GTEX-11TTK-2926-SM-5PNYP
Human	GTEx	Tissue	Brain cortex		1	Unstranded	Paired-end	2x76	28373003	GTEX-11TUW-3126-SM-5GU4Y
Human	GTEx	Tissue	Brain cortex		1	Unstranded	Paired-end	2x76	31345235	GTEX-11WQK-3026-SM-5EQL6
Human	GTEx	Tissue	Brain cortex		1	Unstranded	Paired-end	2x76	33559008	GTEX-11ZUS-2926-SM-5FQSL
Human	GTEx	Tissue	Brain cortex		1	Unstranded	Paired-end	2x76	47875015	GTEX-12126-1026-SM-5P9JJ
Human	GTEx	Tissue	Brain cortex		1	Unstranded	Paired-end	2x76	35716750	GTEX-12696-2926-SM-5FQTG
Human	GTEx	Tissue	Brain cortex		1	Unstranded	Paired-end	2x76	37606399	GTEX-12WS9-2926-SM-5EGL8
Human	GTEx	Tissue	Brain cortex		1	Unstranded	Paired-end	2x76	35413980	GTEX-12WSA-2926-SM-5EQ4D
Human	GTEx	Tissue	Brain cortex		1	Unstranded	Paired-end	2x76	32968376	GTEX-12WSC-3026-SM-5GCNF
Human	GTEx	Tissue	Brain cortex		1	Unstranded	Paired-end	2x76	31372269	GTEX-12WSD-3126-SM-5HL7P
Human	GTEx	Tissue	Brain cortex		1	Unstranded	Paired-end	2x76	34536180	GTEX-12WSH-3026-SM-5CVNI
Human	GTEx	Tissue	Brain cortex		1	Unstranded	Paired-end	2x76	37073269	GTEX-12ZZW-2926-SM-5LZUP
Human	GTEx	Tissue	Brain cortex		1	Unstranded	Paired-end	2x76	31052251	GTEX-12ZZX-2926-SM-5GCOQ
Human	GTEx	Tissue	Brain cortex		1	Unstranded	Paired-end	2x76	31772696	GTEX-12ZZY-3026-SM-5GCOU
Human	GTEx	Tissue	Brain cortex		1	Unstranded	Paired-end	2x76	27017692	GTEX-12ZZZ-3026-SM-5BC67
Human	GTEx	Tissue	Brain cortex		1	Unstranded	Paired-end	2x76	32466760	GTEX-1313W-3126-SM-5LZUI
Human	GTEx	Tissue	Brain cortex		1	Unstranded	Paired-end	2x76	37609596	GTEX-131XW-3126-SM-5LZUC
Human	GTEx	Tissue	Brain cortex		1	Unstranded	Paired-end	2x76	37094454	GTEX-131YS-3126-SM-5KLYT
Human	GTEx	Tissue	Brain cortex		1	Unstranded	Paired-end	2x76	39098169	GTEX-132Q8-3026-SM-5PNVG
Human	GTEx	Tissue	Brain cortex		1	Unstranded	Paired-end	2x76	41938831	GTEX-1399T-3026-SM-5KLZC
Human	GTEx	Tissue	Brain cortex		1	Unstranded	Paired-end	2x76	40467270	GTEX-139T8-1026-SM-5J2MC
Human	GTEx	Tissue	Brain cortex		1	Unstranded	Paired-end	2x76	37975559	GTEX-139UC-3126-SM-5J1OY
Human	GTEx	Tissue	Brain cortex		1	Unstranded	Paired-end	2x76	38701064	GTEX-13FHO-3026-SM-5J1O9
Human	GTEx	Tissue	Brain cortex		1	Unstranded	Paired-end	2x76	44632199	GTEX-13FHP-3026-SM-5IJBS
Human	GTEx	Tissue	Brain cortex		1	Unstranded	Paired-end	2x76	27924030	GTEX-13FLW-1426-SM-5K7YE
Human	GTEx	Tissue	Brain cortex		1	Unstranded	Paired-end	2x76	46301712	GTEX-13FXS-3126-SM-5J2NN
Human	GTEx	Tissue	Brain cortex		1	Unstranded	Paired-end	2x76	37208363	GTEX-13G51-3026-SM-5IJB8
Human	GTEx	Tissue	Brain cortex		1	Unstranded	Paired-end	2x76	29655856	GTEX-13IVO-2926-SM-5L3CZ
Human	GTEx	Tissue	Brain cortex		1	Unstranded	Paired-end	2x76	30797310	GTEX-13JUV-2926-SM-5LZX7
Human	GTEx	Tissue	Brain cortex		1	Unstranded	Paired-end	2x76	28986021	GTEX-13JVG-3126-SM-5L3FH
Human	GTEx	Tissue	Brain cortex		1	Unstranded	Paired-end	2x76	36909704	GTEX-13NYB-3026-SM-5IJD7
Human	GTEx	Tissue	Brain cortex		1	Unstranded	Paired-end	2x76	36190965	GTEX-13NYC-2826-SM-5K7WR
Human	GTEx	Tissue	Brain cortex		1	Unstranded	Paired-end	2x76	45466397	GTEX-13NYS-3126-SM-5KLYV
Human	GTEx	Tissue	Brain cortex		1	Unstranded	Paired-end	2x76	31663611	GTEX-13O3O-3126-SM-5KM3H
Human	GTEx	Tissue	Brain cortex		1	Unstranded	Paired-end	2x76	32185573	GTEX-13O3Q-2926-SM-5KM45
Human	GTEx	Tissue	Brain cortex		1	Unstranded	Paired-end	2x76	38428953	GTEX-13OVH-3026-SM-5MR4N
Human	GTEx	Tissue	Brain cortex		1	Unstranded	Paired-end	2x76	29690285	GTEX-13OVJ-2826-SM-5L3GW
Human	GTEx	Tissue	Brain cortex		1	Unstranded	Paired-end	2x76	36350926	GTEX-13OW6-3026-SM-5J2MI
Human	GTEx	Tissue	Brain cortex		1	Unstranded	Paired-end	2x76	27632715	GTEX-13OW7-3026-SM-5L3GY
Human	GTEx	Tissue	Brain cortex		1	Unstranded	Paired-end	2x76	36669446	GTEX-13OW8-2826-SM-5L3GC
Human	GTEx	Tissue	Brain cortex		1	Unstranded	Paired-end	2x76	28629096	GTEX-13PL6-3126-SM-5LUAR
Human	GTEx	Tissue	Brain cortex		1	Unstranded	Paired-end	2x76	43492948	GTEX-13PVQ-3026-SM-5SI93
Human	GTEx	Tissue	Brain cortex		1	Unstranded	Paired-end	2x76	37040887	GTEX-13QIC-2926-SM-5J2NF
Human	GTEx	Tissue	Brain cortex		1	Unstranded	Paired-end	2x76	32052452	GTEX-13S7M-3126-SM-5RQJQ
Human	GTEx	Tissue	Brain cortex		1	Unstranded	Paired-end	2x76	28310491	GTEX-13SLX-3126-SM-5S2Q5
Human	GTEx	Tissue	Brain cortex		1	Unstranded	Paired-end	2x76	35338934	GTEX-13VXU-2926-SM-5LU5C
Human	GTEx	Tissue	Brain cortex		1	Unstranded	Paired-end	2x76	37083649	GTEX-13X6J-3026-SM-5Q5CU
Human	GTEx	Tissue	Brain cortex		1	Unstranded	Paired-end	2x76	37513669	GTEX-13X6K-2926-SM-5Q5D5
Human	GTEx	Tissue	Brain cortex		1	Unstranded	Paired-end	2x76	46003043	GTEX-1445S-3026-SM-5O9BR
Human	GTEx	Tissue	Brain cortex		1	Unstranded	Paired-end	2x76	34624250	GTEX-144FL-3026-SM-5O99C
Human	GTEx	Tissue	Brain cortex		1	Unstranded	Paired-end	2x76	43597683	GTEX-144GL-3026-SM-5Q5CW
Human	GTEx	Tissue	Brain cortex		1	Unstranded	Paired-end	2x76	35306606	GTEX-145LS-3126-SM-5Q5BY
Human	GTEx	Tissue	Brain cortex		1	Unstranded	Paired-end	2x76	34253880	GTEX-145MF-2726-SM-5O995
Human	GTEx	Tissue	Brain cortex		1	Unstranded	Paired-end	2x76	30655889	GTEX-145MG-3026-SM-5RQJA
Human	GTEx	Tissue	Brain cortex		1	Unstranded	Paired-end	2x76	40232771	GTEX-145MH-3026-SM-5Q5DZ
Human	GTEx	Tissue	Brain cortex		1	Unstranded	Paired-end	2x76	33582973	GTEX-147GR-3026-SM-5S2ML
Human	GTEx	Tissue	Brain cortex		1	Unstranded	Paired-end	2x76	34541214	GTEX-14A5I-2926-SM-5Q5CQ
Human	GTEx	Tissue	Brain cortex		1	Unstranded	Paired-end	2x76	30778578	GTEX-14ASI-3026-SM-5S2PN
Human	GTEx	Tissue	Brain cortex		1	Unstranded	Paired-end	2x76	29578208	GTEX-14BMV-3026-SM-5S2PQ
Human	GTEx	Tissue	Brain cortex		1	Unstranded	Paired-end	2x76	13684202	GTEX-N7MS-2425-SM-26GMD
Human	GTEx	Tissue	Brain cortex		2	Unstranded	Paired-end	2x76	22259517	GTEX-N7MS-2425-SM-26GMU
Human	GTEx	Tissue	Brain cortex		1	Unstranded	Paired-end	2x76	4142200	GTEX-N7MT-1126-SM-2YUNQ
Human	GTEx	Tissue	Brain cortex		2	Unstranded	Paired-end	2x76	29214093	GTEX-N7MT-1126-SM-5SI7V
Human	GTEx	Tissue	Brain cortex		1	Unstranded	Paired-end	2x76	31770334	GTEX-NPJ7-2726-SM-2I3FT
Human	GTEx	Tissue	Brain cortex		1	Unstranded	Paired-end	2x76	9450680	GTEX-NPJ8-1526-SM-26GMH
Human	GTEx	Tissue	Brain cortex		2	Unstranded	Paired-end	2x76	19518096	GTEX-NPJ8-1526-SM-26GMY
Human	GTEx	Tissue	Brain cortex		3	Unstranded	Paired-end	2x76	20633715	GTEX-NPJ8-1526-SM-2D7VU
Human	GTEx	Tissue	Brain cortex		1	Unstranded	Paired-end	2x76	57130843	GTEX-PVOW-2526-SM-2XCF7
Human	GTEx	Tissue	Brain cortex		1	Unstranded	Paired-end	2x76	30946694	GTEX-Q2AG-2926-SM-2HMJ3
Human	GTEx	Tissue	Brain cortex		1	Unstranded	Paired-end	2x76	47724863	GTEX-QDT8-2926-SM-32PKC
Human	GTEx	Tissue	Brain cortex		1	Unstranded	Paired-end	2x76	55716584	GTEX-QMR6-1426-SM-32PLA
Human	GTEx	Tissue	Brain cortex		1	Unstranded	Paired-end	2x76	20940861	GTEX-QVJO-1426-SM-2S1QY
Human	GTEx	Tissue	Brain cortex		1	Unstranded	Paired-end	2x76	25980697	GTEX-QVUS-2826-SM-3GADB
Human	GTEx	Tissue	Brain cortex		1	Unstranded	Paired-end	2x76	3342188	GTEX-R55F-1326-SM-2TF5F
Human	GTEx	Tissue	Brain cortex		2	Unstranded	Paired-end	2x76	45498123	GTEX-R55F-1326-SM-5S2V4
Human	GTEx	Tissue	Brain cortex		1	Unstranded	Paired-end	2x76	34084001	GTEX-RNOR-2326-SM-2TF4I
Human	GTEx	Tissue	Brain cortex		1	Unstranded	Paired-end	2x76	38321242	GTEX-RU72-3026-SM-5SI7Y
Human	GTEx	Tissue	Brain cortex		1	Unstranded	Paired-end	2x76	46590099	GTEX-T2IS-3026-SM-32QPM
Human	GTEx	Tissue	Brain cortex		1	Unstranded	Paired-end	2x76	43763299	GTEX-T5JC-2426-SM-3NMDB
Human	GTEx	Tissue	Brain cortex		1	Unstranded	Paired-end	2x76	42754540	GTEX-T6MN-2626-SM-32PMQ
Human	GTEx	Tissue	Brain cortex		1	Unstranded	Paired-end	2x76	66666895	GTEX-TSE9-3026-SM-3DB76
Human	GTEx	Tissue	Brain cortex		1	Unstranded	Paired-end	2x76	74600092	GTEX-UTHO-3026-SM-3GAFB
Human	GTEx	Tissue	Brain cortex		1	Unstranded	Paired-end	2x76	42437619	GTEX-WHSE-3026-SM-3P5ZH
Human	GTEx	Tissue	Brain cortex		1	Unstranded	Paired-end	2x76	48218379	GTEX-WL46-2926-SM-3LK82
Human	GTEx	Tissue	Brain cortex		1	Unstranded	Paired-end	2x76	42952847	GTEX-WVLH-3026-SM-3MJG9
Human	GTEx	Tissue	Brain cortex		1	Unstranded	Paired-end	2x76	49002017	GTEX-WWYW-3126-SM-3NB39
Human	GTEx	Tissue	Brain cortex		1	Unstranded	Paired-end	2x76	49927492	GTEX-WZTO-2926-SM-3NM9I
Human	GTEx	Tissue	Brain cortex		1	Unstranded	Paired-end	2x76	51046840	GTEX-X4XX-3026-SM-3NMB2
Human	GTEx	Tissue	Brain cortex		1	Unstranded	Paired-end	2x76	31582250	GTEX-X585-3026-SM-46MWF
Human	GTEx	Tissue	Brain cortex		1	Unstranded	Paired-end	2x76	30256791	GTEX-XLM4-3026-SM-4AT6L
Human	GTEx	Tissue	Brain cortex		1	Unstranded	Paired-end	2x76	27395279	GTEX-XMD1-2926-SM-4AT42
Human	GTEx	Tissue	Brain cortex		1	Unstranded	Paired-end	2x76	49132404	GTEX-XOTO-3026-SM-4B65M
Human	GTEx	Tissue	Brain cortex		1	Unstranded	Paired-end	2x76	69849025	GTEX-Y111-2726-SM-4TT3N
Human	GTEx	Tissue	Brain cortex		1	Unstranded	Paired-end	2x76	44136003	GTEX-Y8DK-0826-SM-4TT3T
Human	GTEx	Tissue	Brain cortex		1	Unstranded	Paired-end	2x76	32942396	GTEX-YFC4-3126-SM-5PNV6
Human	GTEx	Tissue	Brain cortex		1	Unstranded	Paired-end	2x76	38486031	GTEX-YJ89-3026-SM-5IFJI
Human	GTEx	Tissue	Brain cortex		1	Unstranded	Paired-end	2x76	35996692	GTEX-Z93S-2926-SM-57WB9
Human	GTEx	Tissue	Brain cortex		1	Unstranded	Paired-end	2x76	32878526	GTEX-ZAJG-3126-SM-5HL9J
Human	GTEx	Tissue	Brain cortex		1	Unstranded	Paired-end	2x76	33854108	GTEX-ZAK1-3026-SM-5S2MJ
Human	GTEx	Tissue	Brain cortex		1	Unstranded	Paired-end	2x76	35579165	GTEX-ZDXO-2126-SM-4WKFI
Human	GTEx	Tissue	Brain cortex		1	Unstranded	Paired-end	2x76	28794540	GTEX-ZE7O-3126-SM-5HL5X
Human	GTEx	Tissue	Brain cortex		1	Unstranded	Paired-end	2x76	25530030	GTEX-ZE9C-3026-SM-4WKHB
Human	GTEx	Tissue	Brain cortex		1	Unstranded	Paired-end	2x76	37951183	GTEX-ZF28-3026-SM-4WKHP
Human	GTEx	Tissue	Brain cortex		1	Unstranded	Paired-end	2x76	33175955	GTEX-ZUA1-3026-SM-59HJC
Human	GTEx	Tissue	Brain cortex		1	Unstranded	Paired-end	2x76	39643634	GTEX-ZVT3-3026-SM-5E43N
Human	GTEx	Tissue	Brain cortex		1	Unstranded	Paired-end	2x76	39601983	GTEX-ZYFD-3026-SM-5E44C
Human	GTEx	Tissue	Brain cortex		1	Unstranded	Paired-end	2x76	32900907	GTEX-ZYY3-3126-SM-5SI9L
Human	GTEx	Tissue	Brain cortex		1	Unstranded	Paired-end	2x76	36143143	GTEX-ZZPT-3026-SM-5GZXH
Human	GTEx	Tissue	Brain frontal cortex		1	Unstranded	Paired-end	2x76	35668756	GTEX-11GSP-0011-R10a-SM-5NQ7J
Human	GTEx	Tissue	Brain frontal cortex		1	Unstranded	Paired-end	2x76	33168753	GTEX-11H98-0011-R10b-SM-5NQ98
Human	GTEx	Tissue	Brain frontal cortex		1	Unstranded	Paired-end	2x76	28148146	GTEX-11WQC-0011-R10a-SM-57WCT
Human	GTEx	Tissue	Brain frontal cortex		1	Unstranded	Paired-end	2x76	25415399	GTEX-11WQK-0011-R10a-SM-5BC6R
Human	GTEx	Tissue	Brain frontal cortex		1	Unstranded	Paired-end	2x76	30905658	GTEX-11ZUS-0011-R10b-SM-5BC79
Human	GTEx	Tissue	Brain frontal cortex		1	Unstranded	Paired-end	2x76	31724895	GTEX-12126-0011-R10b-SM-5BC6T
Human	GTEx	Tissue	Brain frontal cortex		1	Unstranded	Paired-end	2x76	31541043	GTEX-12WS9-0011-R10a-SM-57WBV
Human	GTEx	Tissue	Brain frontal cortex		1	Unstranded	Paired-end	2x76	61071887	GTEX-12WSA-0011-R10b-SM-5P9ET
Human	GTEx	Tissue	Brain frontal cortex		1	Unstranded	Paired-end	2x76	30080164	GTEX-12WSC-0011-R10a-SM-5GU57
Human	GTEx	Tissue	Brain frontal cortex		1	Unstranded	Paired-end	2x76	25769969	GTEX-12WSD-0011-R10b-SM-5GU79
Human	GTEx	Tissue	Brain frontal cortex		1	Unstranded	Paired-end	2x76	52651303	GTEX-12WSE-0011-R10b-SM-5P9JV
Human	GTEx	Tissue	Brain frontal cortex		1	Unstranded	Paired-end	2x76	29031055	GTEX-12WSF-0011-R10a-SM-5LZVH
Human	GTEx	Tissue	Brain frontal cortex		1	Unstranded	Paired-end	2x76	31109370	GTEX-12WSH-0011-R10a-SM-5LZUS
Human	GTEx	Tissue	Brain frontal cortex		1	Unstranded	Paired-end	2x76	36354378	GTEX-12WSM-0011-R10a-SM-5DUWV
Human	GTEx	Tissue	Brain frontal cortex		1	Unstranded	Paired-end	2x76	35244426	GTEX-12ZZW-0011-R10b-SM-5HL9X
Human	GTEx	Tissue	Brain frontal cortex		1	Unstranded	Paired-end	2x76	35427928	GTEX-12ZZX-0011-R10b-SM-5DUWK
Human	GTEx	Tissue	Brain frontal cortex		1	Unstranded	Paired-end	2x76	36385829	GTEX-12ZZY-0011-R10b-SM-5HL7W
Human	GTEx	Tissue	Brain frontal cortex		1	Unstranded	Paired-end	2x76	53455455	GTEX-12ZZZ-0011-R10a-SM-5P9HC
Human	GTEx	Tissue	Brain frontal cortex		1	Unstranded	Paired-end	2x76	34822513	GTEX-1313W-0011-R10b-SM-5DUXA
Human	GTEx	Tissue	Brain frontal cortex		1	Unstranded	Paired-end	2x76	37802238	GTEX-131XH-0011-R10a-SM-5EGLJ
Human	GTEx	Tissue	Brain frontal cortex		1	Unstranded	Paired-end	2x76	31444629	GTEX-131XW-0011-R10a-SM-5DUVA
Human	GTEx	Tissue	Brain frontal cortex		1	Unstranded	Paired-end	2x76	33653951	GTEX-131YS-0011-R10b-SM-5EQ5N
Human	GTEx	Tissue	Brain frontal cortex		1	Unstranded	Paired-end	2x76	27636168	GTEX-132Q8-0011-R10b-SM-5DUWZ
Human	GTEx	Tissue	Brain frontal cortex		1	Unstranded	Paired-end	2x76	42453185	GTEX-139TS-0011-R10a-SM-5K7TU
Human	GTEx	Tissue	Brain frontal cortex		1	Unstranded	Paired-end	2x76	30815878	GTEX-13CZV-0011-R10b-SM-5LZYD
Human	GTEx	Tissue	Brain frontal cortex		1	Unstranded	Paired-end	2x76	50219893	GTEX-13FHO-0011-R10b-SM-5J2MM
Human	GTEx	Tissue	Brain frontal cortex		1	Unstranded	Paired-end	2x76	26050711	GTEX-13FLV-0011-R10b-SM-5LZZ2
Human	GTEx	Tissue	Brain frontal cortex		1	Unstranded	Paired-end	2x76	31611172	GTEX-13FLW-0011-R10b-SM-5LZZF
Human	GTEx	Tissue	Brain frontal cortex		1	Unstranded	Paired-end	2x76	38124039	GTEX-13FTZ-0011-R10b-SM-5KLZS
Human	GTEx	Tissue	Brain frontal cortex		1	Unstranded	Paired-end	2x76	47704520	GTEX-13FXS-0011-R10a-SM-5J2MA
Human	GTEx	Tissue	Brain frontal cortex		1	Unstranded	Paired-end	2x76	30523330	GTEX-13G51-0011-R10b-SM-5LZYF
Human	GTEx	Tissue	Brain frontal cortex		1	Unstranded	Paired-end	2x76	29048621	GTEX-13IVO-0011-R10a-SM-5LZY3
Human	GTEx	Tissue	Brain frontal cortex		1	Unstranded	Paired-end	2x76	33092860	GTEX-13JUV-0011-R10b-SM-5LZXR
Human	GTEx	Tissue	Brain frontal cortex		1	Unstranded	Paired-end	2x76	33145479	GTEX-13JVG-0011-R10b-SM-5KM2P
Human	GTEx	Tissue	Brain frontal cortex		1	Unstranded	Paired-end	2x76	39296790	GTEX-13N1W-0011-R10b-SM-5MR4H
Human	GTEx	Tissue	Brain frontal cortex		1	Unstranded	Paired-end	2x76	38968992	GTEX-13N2G-0011-R10a-SM-5MR34
Human	GTEx	Tissue	Brain frontal cortex		1	Unstranded	Paired-end	2x76	33603650	GTEX-13NYB-0011-R10a-SM-5KM43
Human	GTEx	Tissue	Brain frontal cortex		1	Unstranded	Paired-end	2x76	34471825	GTEX-13NYS-0011-R10a-SM-5MR4S
Human	GTEx	Tissue	Brain frontal cortex		1	Unstranded	Paired-end	2x76	38337225	GTEX-13NZA-0011-R10b-SM-5KM54
Human	GTEx	Tissue	Brain frontal cortex		1	Unstranded	Paired-end	2x76	31368150	GTEX-13O3O-0011-R10a-SM-5LUA9
Human	GTEx	Tissue	Brain frontal cortex		1	Unstranded	Paired-end	2x76	42957754	GTEX-13O3Q-0011-R10b-SM-5KM39
Human	GTEx	Tissue	Brain frontal cortex		1	Unstranded	Paired-end	2x76	29778059	GTEX-13OVJ-0011-R10b-SM-5L3HT
Human	GTEx	Tissue	Brain frontal cortex		1	Unstranded	Paired-end	2x76	32743310	GTEX-13OVL-0011-R10a-SM-5L3GS
Human	GTEx	Tissue	Brain frontal cortex		1	Unstranded	Paired-end	2x76	49544979	GTEX-13OW6-0011-R10a-SM-5L3HE
Human	GTEx	Tissue	Brain frontal cortex		1	Unstranded	Paired-end	2x76	35347526	GTEX-13OW7-0011-R10a-SM-5L3H3
Human	GTEx	Tissue	Brain frontal cortex		1	Unstranded	Paired-end	2x76	31278218	GTEX-13OW8-0011-R10a-SM-5L3H6
Human	GTEx	Tissue	Brain frontal cortex		1	Unstranded	Paired-end	2x76	52720288	GTEX-13QIC-0011-R10a-SM-5O9C7
Human	GTEx	Tissue	Brain frontal cortex		1	Unstranded	Paired-end	2x76	38316331	GTEX-13QJC-0011-R10a-SM-5SI63
Human	GTEx	Tissue	Brain frontal cortex		1	Unstranded	Paired-end	2x76	45842900	GTEX-13RTJ-0011-R10b-SM-5O9CW
Human	GTEx	Tissue	Brain frontal cortex		1	Unstranded	Paired-end	2x76	48788497	GTEX-13S7M-0011-R10b-SM-5PNZB
Human	GTEx	Tissue	Brain frontal cortex		1	Unstranded	Paired-end	2x76	34905844	GTEX-13SLW-0011-R10a-SM-5S2UI
Human	GTEx	Tissue	Brain frontal cortex		1	Unstranded	Paired-end	2x76	50880999	GTEX-13SLX-0011-R10a-SM-5P9HV
Human	GTEx	Tissue	Brain frontal cortex		1	Unstranded	Paired-end	2x76	40445392	GTEX-13X6I-0011-R10a-SM-5PNWI
Human	GTEx	Tissue	Brain frontal cortex		1	Unstranded	Paired-end	2x76	33844324	GTEX-13X6J-0011-R10b-SM-5PNWA
Human	GTEx	Tissue	Brain frontal cortex		1	Unstranded	Paired-end	2x76	45095550	GTEX-13X6K-0011-R10a-SM-5P9JR
Human	GTEx	Tissue	Brain frontal cortex		1	Unstranded	Paired-end	2x76	27343899	GTEX-1445S-0011-R10a-SM-5PNWB
Human	GTEx	Tissue	Brain frontal cortex		1	Unstranded	Paired-end	2x76	49264460	GTEX-145LS-0011-R10a-SM-5PNUQ
Human	GTEx	Tissue	Brain frontal cortex		1	Unstranded	Paired-end	2x76	35881690	GTEX-145LU-0011-R10a-SM-5PNWJ
Human	GTEx	Tissue	Brain frontal cortex		1	Unstranded	Paired-end	2x76	37785506	GTEX-145MH-0011-R10b-SM-5PNUK
Human	GTEx	Tissue	Brain frontal cortex		1	Unstranded	Paired-end	2x76	42163149	GTEX-145MI-0011-R10a-SM-5PNZD
Human	GTEx	Tissue	Brain frontal cortex		1	Unstranded	Paired-end	2x76	35629638	GTEX-14753-0011-R10b-SM-5S2WE
Human	GTEx	Tissue	Brain frontal cortex		1	Unstranded	Paired-end	2x76	23723871	GTEX-1477Z-0011-R10b-SM-5S2RF
Human	GTEx	Tissue	Brain frontal cortex		1	Unstranded	Paired-end	2x76	34596810	GTEX-147F4-0011-R10b-SM-5S2WC
Human	GTEx	Tissue	Brain frontal cortex		1	Unstranded	Paired-end	2x76	43865614	GTEX-147GR-0011-R10b-SM-5S2UM
Human	GTEx	Tissue	Brain frontal cortex		1	Unstranded	Paired-end	2x76	33833518	GTEX-14ASI-0011-R10b-SM-5S2VZ
Human	GTEx	Tissue	Brain frontal cortex		1	Unstranded	Paired-end	2x76	35288211	GTEX-14BIL-0011-R10a-SM-5SI75
Human	GTEx	Tissue	Brain frontal cortex		1	Unstranded	Paired-end	2x76	42923476	GTEX-14BIN-0011-R10a-SM-5S2UA
Human	GTEx	Tissue	Brain frontal cortex		1	Unstranded	Paired-end	2x76	45489994	GTEX-N7MS-0011-R10A-SM-2HMJK
Human	GTEx	Tissue	Brain frontal cortex		1	Unstranded	Paired-end	2x76	34881360	GTEX-N7MT-0011-R10A-SM-2I3E1
Human	GTEx	Tissue	Brain frontal cortex		1	Unstranded	Paired-end	2x76	41918096	GTEX-NL3H-0011-R10A-SM-2I3E9
Human	GTEx	Tissue	Brain frontal cortex		1	Unstranded	Paired-end	2x76	36124746	GTEX-NL4W-0011-R10A-SM-2I3DY
Human	GTEx	Tissue	Brain frontal cortex		1	Unstranded	Paired-end	2x76	34717065	GTEX-NPJ7-0011-R10A-SM-2I3E5
Human	GTEx	Tissue	Brain frontal cortex		1	Unstranded	Paired-end	2x76	33113405	GTEX-NPJ8-0011-R10A-SM-2YUMO
Human	GTEx	Tissue	Brain frontal cortex		1	Unstranded	Paired-end	2x76	38189272	GTEX-OHPN-0011-R10A-SM-33HBU
Human	GTEx	Tissue	Brain frontal cortex		2	Unstranded	Paired-end	2x76	35430287	GTEX-OHPN-0011-R10A-SM-5S2U3
Human	GTEx	Tissue	Brain frontal cortex		1	Unstranded	Paired-end	2x76	40680134	GTEX-P44G-0011-R10A-SM-2I3FF
Human	GTEx	Tissue	Brain frontal cortex		1	Unstranded	Paired-end	2x76	22792130	GTEX-P44H-0011-R10A-SM-2XCEK
Human	GTEx	Tissue	Brain frontal cortex		1	Unstranded	Paired-end	2x76	40215456	GTEX-Q2AG-0011-R10A-SM-2HMLA
Human	GTEx	Tissue	Brain frontal cortex		1	Unstranded	Paired-end	2x76	58626445	GTEX-QDT8-0011-R10A-SM-32PKG
Human	GTEx	Tissue	Brain frontal cortex		1	Unstranded	Paired-end	2x76	51166303	GTEX-QMR6-0011-R10A-SM-32PKO
Human	GTEx	Tissue	Brain frontal cortex		1	Unstranded	Paired-end	2x76	19791703	GTEX-QVJO-0011-R10A-SM-2S1QJ
Human	GTEx	Tissue	Brain frontal cortex		1	Unstranded	Paired-end	2x76	38522549	GTEX-QVUS-0011-R10A-SM-3GIK3
Human	GTEx	Tissue	Brain frontal cortex		1	Unstranded	Paired-end	2x76	12109820	GTEX-RU72-0011-R10A-SM-2TF6D
Human	GTEx	Tissue	Brain frontal cortex		1	Unstranded	Paired-end	2x76	25793844	GTEX-RVPU-0011-R10A-SM-2XCAH
Human	GTEx	Tissue	Brain frontal cortex		1	Unstranded	Paired-end	2x76	37011573	GTEX-S7SE-0011-R10A-SM-2XCDF
Human	GTEx	Tissue	Brain frontal cortex		1	Unstranded	Paired-end	2x76	37006042	GTEX-T5JC-0011-R10A-SM-32PM2
Human	GTEx	Tissue	Brain frontal cortex		1	Unstranded	Paired-end	2x76	52872736	GTEX-T6MN-0011-R10A-SM-32QP7
Human	GTEx	Tissue	Brain frontal cortex		1	Unstranded	Paired-end	2x76	66573959	GTEX-TSE9-0011-R10A-SM-3DB7O
Human	GTEx	Tissue	Brain frontal cortex		1	Unstranded	Paired-end	2x76	31373268	GTEX-UTHO-0011-R10A-SM-3GIJQ
Human	GTEx	Tissue	Brain frontal cortex		1	Unstranded	Paired-end	2x76	51607260	GTEX-WL46-0011-R10A-SM-3MJFQ
Human	GTEx	Tissue	Brain frontal cortex		1	Unstranded	Paired-end	2x76	48166963	GTEX-WVLH-0011-R10A-SM-3MJFM
Human	GTEx	Tissue	Brain frontal cortex		1	Unstranded	Paired-end	2x76	50178442	GTEX-WWYW-0011-R10A-SM-3NB35
Human	GTEx	Tissue	Brain frontal cortex		1	Unstranded	Paired-end	2x76	50829287	GTEX-WZTO-0011-R10B-SM-4E3KB
Human	GTEx	Tissue	Brain frontal cortex		1	Unstranded	Paired-end	2x76	42681880	GTEX-X261-0011-R10B-SM-4E3JT
Human	GTEx	Tissue	Brain frontal cortex		1	Unstranded	Paired-end	2x76	33652031	GTEX-X4EP-0011-R10B-SM-4QASJ
Human	GTEx	Tissue	Brain frontal cortex		1	Unstranded	Paired-end	2x76	28571551	GTEX-X4XX-0011-R10B-SM-46MWO
Human	GTEx	Tissue	Brain frontal cortex		1	Unstranded	Paired-end	2x76	37070781	GTEX-X4XY-0011-R10B-SM-46MWS
Human	GTEx	Tissue	Brain frontal cortex		1	Unstranded	Paired-end	2x76	29687520	GTEX-X585-0011-R10A-SM-46MUY
Human	GTEx	Tissue	Brain frontal cortex		1	Unstranded	Paired-end	2x76	30552703	GTEX-XLM4-0011-R10A-SM-4AT5P
Human	GTEx	Tissue	Brain frontal cortex		1	Unstranded	Paired-end	2x76	29773768	GTEX-XMD1-0011-R10A-SM-4AT4A
Human	GTEx	Tissue	Brain frontal cortex		1	Unstranded	Paired-end	2x76	27387241	GTEX-Y8DK-0011-R10A-SM-4SOK1
Human	GTEx	Tissue	Brain frontal cortex		1	Unstranded	Paired-end	2x76	26623898	GTEX-YFC4-0011-R10a-SM-4SOK5
Human	GTEx	Tissue	Brain frontal cortex		1	Unstranded	Paired-end	2x76	26133527	GTEX-YJ89-0011-R10a-SM-4SOK9
Human	GTEx	Tissue	Brain frontal cortex		1	Unstranded	Paired-end	2x76	36678012	GTEX-Z93S-0011-R10a-SM-4RGNM
Human	GTEx	Tissue	Brain frontal cortex		1	Unstranded	Paired-end	2x76	41000291	GTEX-ZAB4-0011-R10a-SM-4SOKH
Human	GTEx	Tissue	Brain frontal cortex		1	Unstranded	Paired-end	2x76	32064373	GTEX-ZDXO-0011-R10a-SM-4WWD8
Human	GTEx	Tissue	Brain frontal cortex		1	Unstranded	Paired-end	2x76	29372361	GTEX-ZE7O-0011-R10a-SM-57WAZ
Human	GTEx	Tissue	Brain frontal cortex		1	Unstranded	Paired-end	2x76	43037055	GTEX-ZF28-0011-R10a-SM-4WWEH
Human	GTEx	Tissue	Brain frontal cortex		1	Unstranded	Paired-end	2x76	40527074	GTEX-ZUA1-0011-R10a-SM-51MT6
Human	GTEx	Tissue	Brain frontal cortex		1	Unstranded	Paired-end	2x76	40394760	GTEX-ZV68-0011-R10a-SM-51MT7
Human	GTEx	Tissue	Brain frontal cortex		1	Unstranded	Paired-end	2x76	26544329	GTEX-ZVT3-0011-R10b-SM-57WB6
Human	GTEx	Tissue	Brain frontal cortex		1	Unstranded	Paired-end	2x76	41584195	GTEX-ZVZQ-0011-R10b-SM-51MRT
Human	GTEx	Tissue	Brain frontal cortex		1	Unstranded	Paired-end	2x76	30555974	GTEX-ZXG5-0011-R10a-SM-57WDD
Human	GTEx	Tissue	Brain hippocampus		1	Unstranded	Paired-end	2x76	36236583	GTEX-11GSO-0011-R1b-SM-57WD3
Human	GTEx	Tissue	Brain hippocampus		1	Unstranded	Paired-end	2x76	27965132	GTEX-11ONC-0011-R1a-SM-57WD4
Human	GTEx	Tissue	Brain hippocampus		1	Unstranded	Paired-end	2x76	23985871	GTEX-11UD1-0011-R1b-SM-5BC7D
Human	GTEx	Tissue	Brain hippocampus		1	Unstranded	Paired-end	2x76	31227386	GTEX-11ZTS-0011-R1a-SM-5BC71
Human	GTEx	Tissue	Brain hippocampus		1	Unstranded	Paired-end	2x76	25832436	GTEX-11ZVC-0011-R1b-SM-5BC6M
Human	GTEx	Tissue	Brain hippocampus		1	Unstranded	Paired-end	2x76	25076961	GTEX-1212Z-0011-R1b-SM-5BC72
Human	GTEx	Tissue	Brain hippocampus		1	Unstranded	Paired-end	2x76	57855138	GTEX-12WSB-0011-R1b-SM-5P9EY
Human	GTEx	Tissue	Brain hippocampus		1	Unstranded	Paired-end	2x76	32964236	GTEX-12WSD-0011-R1b-SM-5LZVY
Human	GTEx	Tissue	Brain hippocampus		1	Unstranded	Paired-end	2x76	33054891	GTEX-12WSE-0011-R1b-SM-5GU4V
Human	GTEx	Tissue	Brain hippocampus		1	Unstranded	Paired-end	2x76	30595929	GTEX-12WSF-0011-R1a-SM-5DUVI
Human	GTEx	Tissue	Brain hippocampus		1	Unstranded	Paired-end	2x76	30624881	GTEX-12WSH-0011-R1a-SM-5GU5V
Human	GTEx	Tissue	Brain hippocampus		1	Unstranded	Paired-end	2x76	27563961	GTEX-12WSM-0011-R1a-SM-5LZW6
Human	GTEx	Tissue	Brain hippocampus		1	Unstranded	Paired-end	2x76	35819220	GTEX-12ZZX-0011-R1a-SM-5EQ6B
Human	GTEx	Tissue	Brain hippocampus		1	Unstranded	Paired-end	2x76	36971617	GTEX-13112-0011-R1b-SM-5HL7K
Human	GTEx	Tissue	Brain hippocampus		1	Unstranded	Paired-end	2x76	39271351	GTEX-1313W-0011-R1b-SM-5EQ4A
Human	GTEx	Tissue	Brain hippocampus		1	Unstranded	Paired-end	2x76	32641442	GTEX-131XH-0011-R1a-SM-5DUWA
Human	GTEx	Tissue	Brain hippocampus		1	Unstranded	Paired-end	2x76	31805831	GTEX-131YS-0011-R1a-SM-5DUXC
Human	GTEx	Tissue	Brain hippocampus		1	Unstranded	Paired-end	2x76	34641691	GTEX-132Q8-0011-R1a-SM-5EGLK
Human	GTEx	Tissue	Brain hippocampus		1	Unstranded	Paired-end	2x76	27345008	GTEX-1399T-0011-R1b-SM-5DUWN
Human	GTEx	Tissue	Brain hippocampus		1	Unstranded	Paired-end	2x76	30779844	GTEX-139T8-0011-R1a-SM-5HL75
Human	GTEx	Tissue	Brain hippocampus		1	Unstranded	Paired-end	2x76	33412879	GTEX-139TT-0011-R1a-SM-5LZVD
Human	GTEx	Tissue	Brain hippocampus		1	Unstranded	Paired-end	2x76	24315308	GTEX-13CF2-0011-R1a-SM-5LZY1
Human	GTEx	Tissue	Brain hippocampus		1	Unstranded	Paired-end	2x76	38605294	GTEX-13FHO-0011-R1b-SM-5KLZG
Human	GTEx	Tissue	Brain hippocampus		1	Unstranded	Paired-end	2x76	28963686	GTEX-13FHP-0011-R1b-SM-5K7XL
Human	GTEx	Tissue	Brain hippocampus		1	Unstranded	Paired-end	2x76	35735430	GTEX-13FLW-0011-R1b-SM-5LZX2
Human	GTEx	Tissue	Brain hippocampus		1	Unstranded	Paired-end	2x76	44370658	GTEX-13FTY-0011-R1a-SM-5LZXE
Human	GTEx	Tissue	Brain hippocampus		1	Unstranded	Paired-end	2x76	46183527	GTEX-13FXS-0011-R1a-SM-5K7U6
Human	GTEx	Tissue	Brain hippocampus		1	Unstranded	Paired-end	2x76	30600094	GTEX-13G51-0011-R1a-SM-5LZYR
Human	GTEx	Tissue	Brain hippocampus		1	Unstranded	Paired-end	2x76	34716830	GTEX-13JUV-0011-R1a-SM-5LZY4
Human	GTEx	Tissue	Brain hippocampus		1	Unstranded	Paired-end	2x76	36431558	GTEX-13JVG-0011-R1a-SM-5KM32
Human	GTEx	Tissue	Brain hippocampus		1	Unstranded	Paired-end	2x76	35689210	GTEX-13N1W-0011-R1b-SM-5MR4T
Human	GTEx	Tissue	Brain hippocampus		1	Unstranded	Paired-end	2x76	40840124	GTEX-13N2G-0011-R1b-SM-5MR3G
Human	GTEx	Tissue	Brain hippocampus		1	Unstranded	Paired-end	2x76	27170651	GTEX-13NYB-0011-R1b-SM-5KM4F
Human	GTEx	Tissue	Brain hippocampus		1	Unstranded	Paired-end	2x76	33243657	GTEX-13NYS-0011-R1b-SM-5MR55
Human	GTEx	Tissue	Brain hippocampus		1	Unstranded	Paired-end	2x76	41798872	GTEX-13NZ8-0011-R1b-SM-5KM3V
Human	GTEx	Tissue	Brain hippocampus		1	Unstranded	Paired-end	2x76	26934121	GTEX-13NZA-0011-R1b-SM-5LUAF
Human	GTEx	Tissue	Brain hippocampus		1	Unstranded	Paired-end	2x76	32544914	GTEX-13O3O-0011-R1b-SM-5KM2K
Human	GTEx	Tissue	Brain hippocampus		1	Unstranded	Paired-end	2x76	67685769	GTEX-13O3Q-0011-R1b-SM-5KM3L
Human	GTEx	Tissue	Brain hippocampus		1	Unstranded	Paired-end	2x76	30455489	GTEX-13OVJ-0011-R1b-SM-5L3I6
Human	GTEx	Tissue	Brain hippocampus		1	Unstranded	Paired-end	2x76	30616833	GTEX-13OVL-0011-R1a-SM-5L3H5
Human	GTEx	Tissue	Brain hippocampus		1	Unstranded	Paired-end	2x76	32995566	GTEX-13OW5-0011-R1b-SM-5L3GE
Human	GTEx	Tissue	Brain hippocampus		1	Unstranded	Paired-end	2x76	32635374	GTEX-13OW6-0011-R1a-SM-5L3HQ
Human	GTEx	Tissue	Brain hippocampus		1	Unstranded	Paired-end	2x76	28419381	GTEX-13OW7-0011-R1b-SM-5L3HF
Human	GTEx	Tissue	Brain hippocampus		1	Unstranded	Paired-end	2x76	32614201	GTEX-13OW8-0011-R1a-SM-5L3HI
Human	GTEx	Tissue	Brain hippocampus		1	Unstranded	Paired-end	2x76	48411802	GTEX-13PDP-0011-R1a-SM-5PNX5
Human	GTEx	Tissue	Brain hippocampus		1	Unstranded	Paired-end	2x76	44347930	GTEX-13QIC-0011-R1a-SM-5O9CJ
Human	GTEx	Tissue	Brain hippocampus		1	Unstranded	Paired-end	2x76	38974097	GTEX-13QJC-0011-R1b-SM-5S2UU
Human	GTEx	Tissue	Brain hippocampus		1	Unstranded	Paired-end	2x76	52458522	GTEX-13RTJ-0011-R1a-SM-5O9D9
Human	GTEx	Tissue	Brain hippocampus		1	Unstranded	Paired-end	2x76	50615687	GTEX-13RTL-0011-R1a-SM-5PNZ8
Human	GTEx	Tissue	Brain hippocampus		1	Unstranded	Paired-end	2x76	48973418	GTEX-13S7M-0011-R1b-SM-5PNZE
Human	GTEx	Tissue	Brain hippocampus		1	Unstranded	Paired-end	2x76	30077005	GTEX-13SLW-0011-R1a-SM-5S2W7
Human	GTEx	Tissue	Brain hippocampus		1	Unstranded	Paired-end	2x76	43625792	GTEX-13X6I-0011-R1b-SM-5PNZC
Human	GTEx	Tissue	Brain hippocampus		1	Unstranded	Paired-end	2x76	44771796	GTEX-144GL-0011-R1a-SM-5PNZ5
Human	GTEx	Tissue	Brain hippocampus		1	Unstranded	Paired-end	2x76	30067770	GTEX-144GO-0011-R1a-SM-5PNWO
Human	GTEx	Tissue	Brain hippocampus		1	Unstranded	Paired-end	2x76	31956351	GTEX-145LS-0011-R1b-SM-5PNUP
Human	GTEx	Tissue	Brain hippocampus		1	Unstranded	Paired-end	2x76	32807524	GTEX-145LU-0011-R1a-SM-5Q5CE
Human	GTEx	Tissue	Brain hippocampus		1	Unstranded	Paired-end	2x76	48261695	GTEX-145MH-0011-R1b-SM-5PNWY
Human	GTEx	Tissue	Brain hippocampus		1	Unstranded	Paired-end	2x76	34372160	GTEX-14ASI-0011-R1b-SM-5S2TY
Human	GTEx	Tissue	Brain hippocampus		1	Unstranded	Paired-end	2x76	36709481	GTEX-N7MS-0011-R1a-SM-2HMJG
Human	GTEx	Tissue	Brain hippocampus		1	Unstranded	Paired-end	2x76	34797784	GTEX-N7MT-0011-R1a-SM-5SI7S
Human	GTEx	Tissue	Brain hippocampus		1	Unstranded	Paired-end	2x76	29150518	GTEX-NL3H-0011-R1a-SM-48TDJ
Human	GTEx	Tissue	Brain hippocampus		1	Unstranded	Paired-end	2x76	32909740	GTEX-NPJ7-0011-R1a-SM-3GACT
Human	GTEx	Tissue	Brain hippocampus		1	Unstranded	Paired-end	2x76	18001825	GTEX-NPJ8-0011-R1a-SM-2HMLC
Human	GTEx	Tissue	Brain hippocampus		2	Unstranded	Paired-end	2x76	67542096	GTEX-NPJ8-0011-R1a-SM-33HCB
Human	GTEx	Tissue	Brain hippocampus		3	Unstranded	Paired-end	2x76	41063547	GTEX-NPJ8-0011-R1a-SM-5SI8B
Human	GTEx	Tissue	Brain hippocampus		1	Unstranded	Paired-end	2x76	37872232	GTEX-P44G-0011-R1A-SM-2I3FE
Human	GTEx	Tissue	Brain hippocampus		1	Unstranded	Paired-end	2x76	46278213	GTEX-P44H-0011-R1A-SM-3NM8J
Human	GTEx	Tissue	Brain hippocampus		1	Unstranded	Paired-end	2x76	26240593	GTEX-PVOW-0011-R1A-SM-32PL6
Human	GTEx	Tissue	Brain hippocampus		1	Unstranded	Paired-end	2x76	39728193	GTEX-Q2AG-0011-R1A-SM-2HMJI
Human	GTEx	Tissue	Brain hippocampus		1	Unstranded	Paired-end	2x76	22904510	GTEX-QDT8-0011-R1A-SM-32PKS
Human	GTEx	Tissue	Brain hippocampus		1	Unstranded	Paired-end	2x76	48598869	GTEX-QMR6-0011-R1A-SM-32PKW
Human	GTEx	Tissue	Brain hippocampus		1	Unstranded	Paired-end	2x76	16425653	GTEX-QVJO-0011-R1A-SM-2S1QI
Human	GTEx	Tissue	Brain hippocampus		1	Unstranded	Paired-end	2x76	38507126	GTEX-QVUS-0011-R1A-SM-3GAD2
Human	GTEx	Tissue	Brain hippocampus		1	Unstranded	Paired-end	2x76	26104772	GTEX-R55E-0011-R1A-SM-2TC6N
Human	GTEx	Tissue	Brain hippocampus		1	Unstranded	Paired-end	2x76	6105371	GTEX-RNOR-0011-R1A-SM-2TF5D
Human	GTEx	Tissue	Brain hippocampus		2	Unstranded	Paired-end	2x76	41363845	GTEX-RNOR-0011-R1A-SM-5SI8F
Human	GTEx	Tissue	Brain hippocampus		1	Unstranded	Paired-end	2x76	18603059	GTEX-RVPU-0011-R1A-SM-2XCAI
Human	GTEx	Tissue	Brain hippocampus		1	Unstranded	Paired-end	2x76	29168297	GTEX-S7SE-0011-R1A-SM-2XCDE
Human	GTEx	Tissue	Brain hippocampus		1	Unstranded	Paired-end	2x76	12879416	GTEX-T5JC-0011-R1A-SM-32PM6
Human	GTEx	Tissue	Brain hippocampus		1	Unstranded	Paired-end	2x76	41344990	GTEX-T6MN-0011-R1A-SM-32QOY
Human	GTEx	Tissue	Brain hippocampus		1	Unstranded	Paired-end	2x76	28919165	GTEX-TSE9-0011-R1A-SM-3DB7E
Human	GTEx	Tissue	Brain hippocampus		1	Unstranded	Paired-end	2x76	35984233	GTEX-UTHO-0011-R1A-SM-3GIJO
Human	GTEx	Tissue	Brain hippocampus		1	Unstranded	Paired-end	2x76	54770856	GTEX-WHSE-0011-R1A-SM-3P5ZK
Human	GTEx	Tissue	Brain hippocampus		1	Unstranded	Paired-end	2x76	35961714	GTEX-WL46-0011-R1A-SM-3LK6M
Human	GTEx	Tissue	Brain hippocampus		1	Unstranded	Paired-end	2x76	51092476	GTEX-WVLH-0011-R1A-SM-4MVOK
Human	GTEx	Tissue	Brain hippocampus		1	Unstranded	Paired-end	2x76	54918617	GTEX-WWYW-0011-R1A-SM-3TW8G
Human	GTEx	Tissue	Brain hippocampus		1	Unstranded	Paired-end	2x76	40909866	GTEX-WZTO-0011-R1B-SM-3NMAR
Human	GTEx	Tissue	Brain hippocampus		1	Unstranded	Paired-end	2x76	35546027	GTEX-X4EP-0011-R1A-SM-3P624
Human	GTEx	Tissue	Brain hippocampus		1	Unstranded	Paired-end	2x76	52152241	GTEX-X4XX-0011-R1B-SM-3P622
Human	GTEx	Tissue	Brain hippocampus		1	Unstranded	Paired-end	2x76	27888704	GTEX-X585-0011-R1B-SM-46MVE
Human	GTEx	Tissue	Brain hippocampus		1	Unstranded	Paired-end	2x76	35464644	GTEX-XMD1-0011-R1A-SM-4AT4C
Human	GTEx	Tissue	Brain hippocampus		1	Unstranded	Paired-end	2x76	39696093	GTEX-Y8DK-0011-R1A-SM-4RGLO
Human	GTEx	Tissue	Brain hippocampus		1	Unstranded	Paired-end	2x76	51830066	GTEX-YFC4-0011-R1a-SM-4V6EH
Human	GTEx	Tissue	Brain hippocampus		1	Unstranded	Paired-end	2x76	41615920	GTEX-YJ89-0011-R1a-SM-4RGLS
Human	GTEx	Tissue	Brain hippocampus		1	Unstranded	Paired-end	2x76	29248944	GTEX-ZAB4-0011-R1a-SM-4RGNO
Human	GTEx	Tissue	Brain hippocampus		1	Unstranded	Paired-end	2x76	38830426	GTEX-ZDXO-0011-R1a-SM-4WKF4
Human	GTEx	Tissue	Brain hippocampus		1	Unstranded	Paired-end	2x76	47306408	GTEX-ZE7O-0011-R1a-SM-57WDM
Human	GTEx	Tissue	Brain hippocampus		1	Unstranded	Paired-end	2x76	30891363	GTEX-ZF28-0011-R1a-SM-4WWD1
Human	GTEx	Tissue	Brain hippocampus		1	Unstranded	Paired-end	2x76	32319018	GTEX-ZUA1-0011-R1a-SM-4YCE2
Human	GTEx	Tissue	Brain hippocampus		1	Unstranded	Paired-end	2x76	23422238	GTEX-ZVZQ-0011-R1a-SM-57WBU
Human	GTEx	Tissue	Brain hypothalamus		1	Unstranded	Paired-end	2x76	40901387	GTEX-11GSP-0011-R8b-SM-5NQ79
Human	GTEx	Tissue	Brain hypothalamus		1	Unstranded	Paired-end	2x76	33318726	GTEX-11H98-0011-R8a-SM-5NQ8V
Human	GTEx	Tissue	Brain hypothalamus		1	Unstranded	Paired-end	2x76	38194045	GTEX-11OF3-0011-R8b-SM-57WCS
Human	GTEx	Tissue	Brain hypothalamus		1	Unstranded	Paired-end	2x76	32134598	GTEX-11ONC-0011-R8b-SM-5NQ87
Human	GTEx	Tissue	Brain hypothalamus		1	Unstranded	Paired-end	2x76	29412202	GTEX-11WQC-0011-R8b-SM-57WCH
Human	GTEx	Tissue	Brain hypothalamus		1	Unstranded	Paired-end	2x76	26407854	GTEX-11WQK-0011-R8a-SM-5BC7C
Human	GTEx	Tissue	Brain hypothalamus		1	Unstranded	Paired-end	2x76	32484184	GTEX-11ZTS-0011-R8a-SM-57WDI
Human	GTEx	Tissue	Brain hypothalamus		1	Unstranded	Paired-end	2x76	27276878	GTEX-11ZUS-0011-R8a-SM-5BC73
Human	GTEx	Tissue	Brain hypothalamus		1	Unstranded	Paired-end	2x76	64030764	GTEX-12WSA-0011-R8a-SM-5P9EX
Human	GTEx	Tissue	Brain hypothalamus		1	Unstranded	Paired-end	2x76	34531316	GTEX-12WSM-0011-R8a-SM-5DUWJ
Human	GTEx	Tissue	Brain hypothalamus		1	Unstranded	Paired-end	2x76	28993369	GTEX-12ZZX-0011-R8a-SM-5DUW8
Human	GTEx	Tissue	Brain hypothalamus		1	Unstranded	Paired-end	2x76	31899552	GTEX-1313W-0011-R8a-SM-5DUVM
Human	GTEx	Tissue	Brain hypothalamus		1	Unstranded	Paired-end	2x76	34963855	GTEX-131XH-0011-R8a-SM-5EGLL
Human	GTEx	Tissue	Brain hypothalamus		1	Unstranded	Paired-end	2x76	30178051	GTEX-131XW-0011-R8a-SM-5DUWY
Human	GTEx	Tissue	Brain hypothalamus		1	Unstranded	Paired-end	2x76	29489746	GTEX-132Q8-0011-R8b-SM-5DUWX
Human	GTEx	Tissue	Brain hypothalamus		1	Unstranded	Paired-end	2x76	33819581	GTEX-1399T-0011-R8b-SM-5IJD8
Human	GTEx	Tissue	Brain hypothalamus		1	Unstranded	Paired-end	2x76	39821710	GTEX-139TS-0011-R8a-SM-5J1NP
Human	GTEx	Tissue	Brain hypothalamus		1	Unstranded	Paired-end	2x76	32869605	GTEX-139UC-0011-R8b-SM-5IJCL
Human	GTEx	Tissue	Brain hypothalamus		1	Unstranded	Paired-end	2x76	28821292	GTEX-13CF2-0011-R8b-SM-5IJCX
Human	GTEx	Tissue	Brain hypothalamus		1	Unstranded	Paired-end	2x76	30742224	GTEX-13CIG-0011-R8b-SM-5LZX5
Human	GTEx	Tissue	Brain hypothalamus		1	Unstranded	Paired-end	2x76	29233603	GTEX-13FLV-0011-R8a-SM-5LZZE
Human	GTEx	Tissue	Brain hypothalamus		1	Unstranded	Paired-end	2x76	48436368	GTEX-13FLW-0011-R8b-SM-5J1MZ
Human	GTEx	Tissue	Brain hypothalamus		1	Unstranded	Paired-end	2x76	45015886	GTEX-13FXS-0011-R8a-SM-5J1MN
Human	GTEx	Tissue	Brain hypothalamus		1	Unstranded	Paired-end	2x76	202228008	GTEX-13G51-0011-R8b-SM-5LZZ4
Human	GTEx	Tissue	Brain hypothalamus		1	Unstranded	Paired-end	2x76	31720269	GTEX-13IVO-0011-R8a-SM-5L3DY
Human	GTEx	Tissue	Brain hypothalamus		1	Unstranded	Paired-end	2x76	29749386	GTEX-13JVG-0011-R8a-SM-5KM3E
Human	GTEx	Tissue	Brain hypothalamus		1	Unstranded	Paired-end	2x76	40848591	GTEX-13N1W-0011-R8a-SM-5MR56
Human	GTEx	Tissue	Brain hypothalamus		1	Unstranded	Paired-end	2x76	35263479	GTEX-13NYB-0011-R8a-SM-5KM4R
Human	GTEx	Tissue	Brain hypothalamus		1	Unstranded	Paired-end	2x76	37324208	GTEX-13NYS-0011-R8a-SM-5MR5H
Human	GTEx	Tissue	Brain hypothalamus		1	Unstranded	Paired-end	2x76	38208243	GTEX-13NZ8-0011-R8b-SM-5KM48
Human	GTEx	Tissue	Brain hypothalamus		1	Unstranded	Paired-end	2x76	35811319	GTEX-13NZA-0011-R8b-SM-5KM2Q
Human	GTEx	Tissue	Brain hypothalamus		1	Unstranded	Paired-end	2x76	32451909	GTEX-13O3O-0011-R8b-SM-5LUAL
Human	GTEx	Tissue	Brain hypothalamus		1	Unstranded	Paired-end	2x76	42574481	GTEX-13O3Q-0011-R8b-SM-5KM2J
Human	GTEx	Tissue	Brain hypothalamus		1	Unstranded	Paired-end	2x76	45618113	GTEX-13OVH-0011-R8b-SM-5MR35
Human	GTEx	Tissue	Brain hypothalamus		1	Unstranded	Paired-end	2x76	35090550	GTEX-13OVJ-0011-R8b-SM-5L3FS
Human	GTEx	Tissue	Brain hypothalamus		1	Unstranded	Paired-end	2x76	32444377	GTEX-13OVL-0011-R8a-SM-5L3HH
Human	GTEx	Tissue	Brain hypothalamus		1	Unstranded	Paired-end	2x76	30250446	GTEX-13OW5-0011-R8a-SM-5L3GQ
Human	GTEx	Tissue	Brain hypothalamus		1	Unstranded	Paired-end	2x76	37372958	GTEX-13OW6-0011-R8a-SM-5L3GF
Human	GTEx	Tissue	Brain hypothalamus		1	Unstranded	Paired-end	2x76	33541648	GTEX-13OW7-0011-R8b-SM-5L3HR
Human	GTEx	Tissue	Brain hypothalamus		1	Unstranded	Paired-end	2x76	33510686	GTEX-13OW8-0011-R8a-SM-5L3G5
Human	GTEx	Tissue	Brain hypothalamus		1	Unstranded	Paired-end	2x76	48981914	GTEX-13PDP-0011-R8b-SM-5O9CS
Human	GTEx	Tissue	Brain hypothalamus		1	Unstranded	Paired-end	2x76	52107623	GTEX-13QIC-0011-R8b-SM-5O9CV
Human	GTEx	Tissue	Brain hypothalamus		1	Unstranded	Paired-end	2x76	35517521	GTEX-13QJC-0011-R8b-SM-5S2U6
Human	GTEx	Tissue	Brain hypothalamus		1	Unstranded	Paired-end	2x76	42372012	GTEX-13RTJ-0011-R8b-SM-5O9DL
Human	GTEx	Tissue	Brain hypothalamus		1	Unstranded	Paired-end	2x76	32341720	GTEX-13SLW-0011-R8b-SM-5SI64
Human	GTEx	Tissue	Brain hypothalamus		1	Unstranded	Paired-end	2x76	52191356	GTEX-13SLX-0011-R8b-SM-5PNWZ
Human	GTEx	Tissue	Brain hypothalamus		1	Unstranded	Paired-end	2x76	49033355	GTEX-13X6I-0011-R8a-SM-5PNZF
Human	GTEx	Tissue	Brain hypothalamus		1	Unstranded	Paired-end	2x76	35745371	GTEX-13X6J-0011-R8b-SM-5PNUA
Human	GTEx	Tissue	Brain hypothalamus		1	Unstranded	Paired-end	2x76	47138077	GTEX-13X6K-0011-R8b-SM-5PNZ4
Human	GTEx	Tissue	Brain hypothalamus		1	Unstranded	Paired-end	2x76	48941882	GTEX-1445S-0011-R8a-SM-5PNWX
Human	GTEx	Tissue	Brain hypothalamus		1	Unstranded	Paired-end	2x76	28017631	GTEX-144GL-0011-R8a-SM-5Q5B1
Human	GTEx	Tissue	Brain hypothalamus		1	Unstranded	Paired-end	2x76	45940133	GTEX-145LS-0011-R8b-SM-5PNXA
Human	GTEx	Tissue	Brain hypothalamus		1	Unstranded	Paired-end	2x76	53935928	GTEX-145LU-0011-R8b-SM-5PNZG
Human	GTEx	Tissue	Brain hypothalamus		1	Unstranded	Paired-end	2x76	28175265	GTEX-145MH-0011-R8a-SM-5PNUL
Human	GTEx	Tissue	Brain hypothalamus		1	Unstranded	Paired-end	2x76	41344392	GTEX-145MI-0011-R8b-SM-5PNZ9
Human	GTEx	Tissue	Brain hypothalamus		1	Unstranded	Paired-end	2x76	38687253	GTEX-14753-0011-R8b-SM-5S2U1
Human	GTEx	Tissue	Brain hypothalamus		1	Unstranded	Paired-end	2x76	39037471	GTEX-147F4-0011-R8b-SM-5S2UN
Human	GTEx	Tissue	Brain hypothalamus		1	Unstranded	Paired-end	2x76	40241114	GTEX-14ASI-0011-R8b-SM-5S2UB
Human	GTEx	Tissue	Brain hypothalamus		1	Unstranded	Paired-end	2x76	31214382	GTEX-N7MS-0011-R8a-SM-2YUMK
Human	GTEx	Tissue	Brain hypothalamus		1	Unstranded	Paired-end	2x76	45428595	GTEX-NL3H-0011-R8a-SM-5S2VF
Human	GTEx	Tissue	Brain hypothalamus		1	Unstranded	Paired-end	2x76	37364803	GTEX-NL4W-0011-R8a-SM-2I3G4
Human	GTEx	Tissue	Brain hypothalamus		1	Unstranded	Paired-end	2x76	26089732	GTEX-NPJ7-0011-R8a-SM-2I3G2
Human	GTEx	Tissue	Brain hypothalamus		1	Unstranded	Paired-end	2x76	46713702	GTEX-NPJ8-0011-R8a-SM-2HMLG
Human	GTEx	Tissue	Brain hypothalamus		2	Unstranded	Paired-end	2x76	67546825	GTEX-OHPN-0011-R8A-SM-33HBT
Human	GTEx	Tissue	Brain hypothalamus		1	Unstranded	Paired-end	2x76	48265823	GTEX-P44H-0011-R8A-SM-2XCEL
Human	GTEx	Tissue	Brain hypothalamus		1	Unstranded	Paired-end	2x76	32878775	GTEX-Q2AG-0011-R8A-SM-2HMK5
Human	GTEx	Tissue	Brain hypothalamus		1	Unstranded	Paired-end	2x76	8142788	GTEX-QDT8-0011-R8A-SM-32PKE
Human	GTEx	Tissue	Brain hypothalamus		1	Unstranded	Paired-end	2x76	54536254	GTEX-QMR6-0011-R8A-SM-32PKJ
Human	GTEx	Tissue	Brain hypothalamus		1	Unstranded	Paired-end	2x76	30082936	GTEX-QVJO-0011-R8A-SM-447C7
Human	GTEx	Tissue	Brain hypothalamus		1	Unstranded	Paired-end	2x76	33639703	GTEX-QVUS-0011-R8A-SM-3GAD7
Human	GTEx	Tissue	Brain hypothalamus		1	Unstranded	Paired-end	2x76	24240236	GTEX-R55E-0011-R8A-SM-2TC66
Human	GTEx	Tissue	Brain hypothalamus		1	Unstranded	Paired-end	2x76	15179945	GTEX-R55F-0011-R8A-SM-2TF4F
Human	GTEx	Tissue	Brain hypothalamus		1	Unstranded	Paired-end	2x76	13733030	GTEX-RU72-0011-R8A-SM-2TF61
Human	GTEx	Tissue	Brain hypothalamus		1	Unstranded	Paired-end	2x76	11015770	GTEX-RVPU-0011-R8A-SM-2TF74
Human	GTEx	Tissue	Brain hypothalamus		2	Unstranded	Paired-end	2x76	32461927	GTEX-RVPU-0011-R8A-SM-5SI8I
Human	GTEx	Tissue	Brain hypothalamus		1	Unstranded	Paired-end	2x76	25104439	GTEX-S7SE-0011-R8A-SM-2XCDG
Human	GTEx	Tissue	Brain hypothalamus		1	Unstranded	Paired-end	2x76	47324654	GTEX-T5JC-0011-R8A-SM-32PLM
Human	GTEx	Tissue	Brain hypothalamus		1	Unstranded	Paired-end	2x76	37588222	GTEX-T6MN-0011-R8A-SM-32QP3
Human	GTEx	Tissue	Brain hypothalamus		1	Unstranded	Paired-end	2x76	25631100	GTEX-TSE9-0011-R8A-SM-3DB7R
Human	GTEx	Tissue	Brain hypothalamus		1	Unstranded	Paired-end	2x76	48550036	GTEX-WHSE-0011-R8A-SM-3P5Z1
Human	GTEx	Tissue	Brain hypothalamus		1	Unstranded	Paired-end	2x76	42601405	GTEX-WVLH-0011-R8A-SM-3MJFC
Human	GTEx	Tissue	Brain hypothalamus		1	Unstranded	Paired-end	2x76	50556464	GTEX-WWYW-0011-R8A-SM-3NB3S
Human	GTEx	Tissue	Brain hypothalamus		1	Unstranded	Paired-end	2x76	44804266	GTEX-WZTO-0011-R8A-SM-4E3II
Human	GTEx	Tissue	Brain hypothalamus		1	Unstranded	Paired-end	2x76	42624714	GTEX-X261-0011-R8A-SM-4E3I5
Human	GTEx	Tissue	Brain hypothalamus		1	Unstranded	Paired-end	2x76	28525782	GTEX-X4EP-0011-R8B-SM-4QASL
Human	GTEx	Tissue	Brain hypothalamus		1	Unstranded	Paired-end	2x76	31926528	GTEX-X4XX-0011-R8B-SM-46MWM
Human	GTEx	Tissue	Brain hypothalamus		1	Unstranded	Paired-end	2x76	26737366	GTEX-X4XY-0011-R8A-SM-46MVC
Human	GTEx	Tissue	Brain hypothalamus		1	Unstranded	Paired-end	2x76	30275309	GTEX-X585-0011-R8A-SM-46MUX
Human	GTEx	Tissue	Brain hypothalamus		1	Unstranded	Paired-end	2x76	31539761	GTEX-XLM4-0011-R8A-SM-4AT44
Human	GTEx	Tissue	Brain hypothalamus		1	Unstranded	Paired-end	2x76	34188561	GTEX-XMD1-0011-R8A-SM-4AT48
Human	GTEx	Tissue	Brain hypothalamus		1	Unstranded	Paired-end	2x76	46879886	GTEX-XOTO-0011-R8A-SM-4B65J
Human	GTEx	Tissue	Brain hypothalamus		1	Unstranded	Paired-end	2x76	32584532	GTEX-YFC4-0011-R8a-SM-4SOK3
Human	GTEx	Tissue	Brain hypothalamus		1	Unstranded	Paired-end	2x76	33501900	GTEX-YJ89-0011-R8b-SM-4SOK8
Human	GTEx	Tissue	Brain hypothalamus		1	Unstranded	Paired-end	2x76	34602887	GTEX-Z93S-0011-R8a-SM-4RGNL
Human	GTEx	Tissue	Brain hypothalamus		1	Unstranded	Paired-end	2x76	36818598	GTEX-ZAB4-0011-R8b-SM-4SOKF
Human	GTEx	Tissue	Brain hypothalamus		1	Unstranded	Paired-end	2x76	28564985	GTEX-ZDXO-0011-R8a-SM-4WWD7
Human	GTEx	Tissue	Brain hypothalamus		1	Unstranded	Paired-end	2x76	34454166	GTEX-ZF28-0011-R8a-SM-4WWFW
Human	GTEx	Tissue	Brain hypothalamus		1	Unstranded	Paired-end	2x76	30088859	GTEX-ZUA1-0011-R8b-SM-51MST
Human	GTEx	Tissue	Brain hypothalamus		1	Unstranded	Paired-end	2x76	31005719	GTEX-ZVT3-0011-R8b-SM-57WDJ
Human	GTEx	Tissue	Brain hypothalamus		1	Unstranded	Paired-end	2x76	41708685	GTEX-ZVZQ-0011-R8a-SM-51MR5
Human	GTEx	Tissue	Brain hypothalamus		1	Unstranded	Paired-end	2x76	82432919	GTEX-ZXG5-0011-R8a-SM-57WD1
Human	GTEx	Tissue	Esophagus - Mucosa		1	Unstranded	Paired-end	2x76	37102823	GTEX-111CU-0726-SM-5GZYD
Human	GTEx	Tissue	Esophagus - Mucosa		1	Unstranded	Paired-end	2x76	30383722	GTEX-111YS-0926-SM-5EGGI
Human	GTEx	Tissue	Esophagus - Mucosa		1	Unstranded	Paired-end	2x76	32729576	GTEX-1122O-1726-SM-5GICM
Human	GTEx	Tissue	Esophagus - Mucosa		1	Unstranded	Paired-end	2x76	33928312	GTEX-117YW-1926-SM-5H121
Human	GTEx	Tissue	Esophagus - Mucosa		1	Unstranded	Paired-end	2x76	32081207	GTEX-117YX-1626-SM-5GZZG
Human	GTEx	Tissue	Esophagus - Mucosa		1	Unstranded	Paired-end	2x76	42122641	GTEX-11DXX-1126-SM-5GZZK
Human	GTEx	Tissue	Esophagus - Mucosa		1	Unstranded	Paired-end	2x76	32184741	GTEX-11DXY-1426-SM-5N9CN
Human	GTEx	Tissue	Esophagus - Mucosa		1	Unstranded	Paired-end	2x76	37346678	GTEX-11DXZ-1226-SM-5H11L
Human	GTEx	Tissue	Esophagus - Mucosa		1	Unstranded	Paired-end	2x76	34971925	GTEX-11DYG-1326-SM-5N9DO
Human	GTEx	Tissue	Esophagus - Mucosa		1	Unstranded	Paired-end	2x76	37792910	GTEX-11DZ1-2026-SM-5A5KG
Human	GTEx	Tissue	Esophagus - Mucosa		1	Unstranded	Paired-end	2x76	44462111	GTEX-11EI6-1526-SM-5P9GL
Human	GTEx	Tissue	Esophagus - Mucosa		1	Unstranded	Paired-end	2x76	35821416	GTEX-11EM3-0826-SM-5N9CC
Human	GTEx	Tissue	Esophagus - Mucosa		1	Unstranded	Paired-end	2x76	32517221	GTEX-11EMC-2226-SM-5A5JW
Human	GTEx	Tissue	Esophagus - Mucosa		1	Unstranded	Paired-end	2x76	35639702	GTEX-11EQ9-0726-SM-5A5K2
Human	GTEx	Tissue	Esophagus - Mucosa		1	Unstranded	Paired-end	2x76	35674293	GTEX-11GSP-1826-SM-5N9DQ
Human	GTEx	Tissue	Esophagus - Mucosa		1	Unstranded	Paired-end	2x76	32924187	GTEX-11I78-1526-SM-5A5K7
Human	GTEx	Tissue	Esophagus - Mucosa		1	Unstranded	Paired-end	2x76	27256804	GTEX-11ILO-1026-SM-5A5LP
Human	GTEx	Tissue	Esophagus - Mucosa		1	Unstranded	Paired-end	2x76	23715635	GTEX-11LCK-1726-SM-5S2OQ
Human	GTEx	Tissue	Esophagus - Mucosa		1	Unstranded	Paired-end	2x76	37158124	GTEX-11NSD-1126-SM-5N9BQ
Human	GTEx	Tissue	Esophagus - Mucosa		1	Unstranded	Paired-end	2x76	43579967	GTEX-11NUK-1326-SM-5P9GN
Human	GTEx	Tissue	Esophagus - Mucosa		1	Unstranded	Paired-end	2x76	29503465	GTEX-11ONC-1526-SM-5GU6S
Human	GTEx	Tissue	Esophagus - Mucosa		1	Unstranded	Paired-end	2x76	35643403	GTEX-11P7K-1326-SM-5BC5G
Human	GTEx	Tissue	Esophagus - Mucosa		1	Unstranded	Paired-end	2x76	67623816	GTEX-11P81-0826-SM-5P9GR
Human	GTEx	Tissue	Esophagus - Mucosa		1	Unstranded	Paired-end	2x76	29719586	GTEX-11P82-0526-SM-5986P
Human	GTEx	Tissue	Esophagus - Mucosa		1	Unstranded	Paired-end	2x76	39359827	GTEX-11TT1-0526-SM-5P9JO
Human	GTEx	Tissue	Esophagus - Mucosa		1	Unstranded	Paired-end	2x76	33344578	GTEX-11TUW-1326-SM-5EQKV
Human	GTEx	Tissue	Esophagus - Mucosa		1	Unstranded	Paired-end	2x76	35258788	GTEX-11VI4-0526-SM-5EQ48
Human	GTEx	Tissue	Esophagus - Mucosa		1	Unstranded	Paired-end	2x76	28092863	GTEX-11XUK-0826-SM-5GU6P
Human	GTEx	Tissue	Esophagus - Mucosa		1	Unstranded	Paired-end	2x76	24659124	GTEX-11ZTS-2626-SM-5EGIC
Human	GTEx	Tissue	Esophagus - Mucosa		1	Unstranded	Paired-end	2x76	25474981	GTEX-11ZU8-1526-SM-5EGHX
Human	GTEx	Tissue	Esophagus - Mucosa		1	Unstranded	Paired-end	2x76	30136000	GTEX-1211K-0926-SM-5FQTL
Human	GTEx	Tissue	Esophagus - Mucosa		1	Unstranded	Paired-end	2x76	32825006	GTEX-1212Z-2126-SM-5FQTM
Human	GTEx	Tissue	Esophagus - Mucosa		1	Unstranded	Paired-end	2x76	35061840	GTEX-12696-1326-SM-5FQTJ
Human	GTEx	Tissue	Esophagus - Mucosa		1	Unstranded	Paired-end	2x76	44661006	GTEX-1269C-1026-SM-5N9EY
Human	GTEx	Tissue	Esophagus - Mucosa		1	Unstranded	Paired-end	2x76	32651366	GTEX-12BJ1-1626-SM-5HL8Y
Human	GTEx	Tissue	Esophagus - Mucosa		1	Unstranded	Paired-end	2x76	38097377	GTEX-12C56-1226-SM-5FQSU
Human	GTEx	Tissue	Esophagus - Mucosa		1	Unstranded	Paired-end	2x76	29730897	GTEX-12KS4-0926-SM-5BC5S
Human	GTEx	Tissue	Esophagus - Mucosa		1	Unstranded	Paired-end	2x76	31214553	GTEX-12WS9-1526-SM-5FQT4
Human	GTEx	Tissue	Esophagus - Mucosa		1	Unstranded	Paired-end	2x76	34017349	GTEX-12WSA-1426-SM-5EGJU
Human	GTEx	Tissue	Esophagus - Mucosa		1	Unstranded	Paired-end	2x76	34297065	GTEX-12WSD-1826-SM-5GCOA
Human	GTEx	Tissue	Esophagus - Mucosa		1	Unstranded	Paired-end	2x76	32824866	GTEX-12WSK-1126-SM-5LZV8
Human	GTEx	Tissue	Esophagus - Mucosa		1	Unstranded	Paired-end	2x76	30342546	GTEX-12WSL-1526-SM-5GCP8
Human	GTEx	Tissue	Esophagus - Mucosa		1	Unstranded	Paired-end	2x76	26383082	GTEX-12ZZW-1726-SM-5DUVD
Human	GTEx	Tissue	Esophagus - Mucosa		1	Unstranded	Paired-end	2x76	31873303	GTEX-12ZZX-1326-SM-5DUWI
Human	GTEx	Tissue	Esophagus - Mucosa		1	Unstranded	Paired-end	2x76	50672854	GTEX-12ZZY-1426-SM-5N9EI
Human	GTEx	Tissue	Esophagus - Mucosa		1	Unstranded	Paired-end	2x76	30208532	GTEX-13111-0826-SM-5LZV3
Human	GTEx	Tissue	Esophagus - Mucosa		1	Unstranded	Paired-end	2x76	24449822	GTEX-1314G-0826-SM-5BC6L
Human	GTEx	Tissue	Esophagus - Mucosa		1	Unstranded	Paired-end	2x76	31375776	GTEX-131XE-1426-SM-5HL7V
Human	GTEx	Tissue	Esophagus - Mucosa		1	Unstranded	Paired-end	2x76	39878498	GTEX-131XF-0826-SM-5GICG
Human	GTEx	Tissue	Esophagus - Mucosa		1	Unstranded	Paired-end	2x76	31869949	GTEX-131XG-1026-SM-5GCMX
Human	GTEx	Tissue	Esophagus - Mucosa		1	Unstranded	Paired-end	2x76	36926149	GTEX-131YS-1426-SM-5IJF7
Human	GTEx	Tissue	Esophagus - Mucosa		1	Unstranded	Paired-end	2x76	40076944	GTEX-132AR-2226-SM-5J2NT
Human	GTEx	Tissue	Esophagus - Mucosa		1	Unstranded	Paired-end	2x76	31841310	GTEX-132Q8-1826-SM-5EGIY
Human	GTEx	Tissue	Esophagus - Mucosa		1	Unstranded	Paired-end	2x76	53466809	GTEX-132QS-1426-SM-5P9GE
Human	GTEx	Tissue	Esophagus - Mucosa		1	Unstranded	Paired-end	2x76	34398102	GTEX-1339X-1226-SM-5PNVO
Human	GTEx	Tissue	Esophagus - Mucosa		1	Unstranded	Paired-end	2x76	31572186	GTEX-133LE-0626-SM-5IFFJ
Human	GTEx	Tissue	Esophagus - Mucosa		1	Unstranded	Paired-end	2x76	36817871	GTEX-1399Q-1126-SM-5P9JA
Human	GTEx	Tissue	Esophagus - Mucosa		1	Unstranded	Paired-end	2x76	47225097	GTEX-1399R-0826-SM-5IJEL
Human	GTEx	Tissue	Esophagus - Mucosa		1	Unstranded	Paired-end	2x76	55222709	GTEX-1399S-1326-SM-5P9GH
Human	GTEx	Tissue	Esophagus - Mucosa		1	Unstranded	Paired-end	2x76	42259680	GTEX-1399U-1026-SM-5J1OC
Human	GTEx	Tissue	Esophagus - Mucosa		1	Unstranded	Paired-end	2x76	41349975	GTEX-139T6-0626-SM-5IFF9
Human	GTEx	Tissue	Esophagus - Mucosa		1	Unstranded	Paired-end	2x76	38195039	GTEX-139TU-1226-SM-5J2NL
Human	GTEx	Tissue	Esophagus - Mucosa		1	Unstranded	Paired-end	2x76	48495006	GTEX-139UW-1126-SM-5IJEJ
Human	GTEx	Tissue	Esophagus - Mucosa		1	Unstranded	Paired-end	2x76	36149716	GTEX-139YR-1726-SM-5IFFK
Human	GTEx	Tissue	Esophagus - Mucosa		1	Unstranded	Paired-end	2x76	31982218	GTEX-13CF3-1626-SM-5IFG9
Human	GTEx	Tissue	Esophagus - Mucosa		1	Unstranded	Paired-end	2x76	35928554	GTEX-13D11-1926-SM-5IFGB
Human	GTEx	Tissue	Esophagus - Mucosa		1	Unstranded	Paired-end	2x76	37383079	GTEX-13FH7-0526-SM-5IJF8
Human	GTEx	Tissue	Esophagus - Mucosa		1	Unstranded	Paired-end	2x76	34412857	GTEX-13FHO-1726-SM-5IFGM
Human	GTEx	Tissue	Esophagus - Mucosa		1	Unstranded	Paired-end	2x76	39210931	GTEX-13FHP-1526-SM-5IJGE
Human	GTEx	Tissue	Esophagus - Mucosa		1	Unstranded	Paired-end	2x76	39558254	GTEX-13FLV-1126-SM-5J2NO
Human	GTEx	Tissue	Esophagus - Mucosa		1	Unstranded	Paired-end	2x76	29544710	GTEX-13FTW-1626-SM-5KM4N
Human	GTEx	Tissue	Esophagus - Mucosa		1	Unstranded	Paired-end	2x76	29134148	GTEX-13FTX-0526-SM-5IFGS
Human	GTEx	Tissue	Esophagus - Mucosa		1	Unstranded	Paired-end	2x76	31415640	GTEX-13G51-0926-SM-5IFFU
Human	GTEx	Tissue	Esophagus - Mucosa		1	Unstranded	Paired-end	2x76	36343264	GTEX-13JVG-2026-SM-5KM1N
Human	GTEx	Tissue	Esophagus - Mucosa		1	Unstranded	Paired-end	2x76	28821306	GTEX-13N11-1226-SM-5KM4D
Human	GTEx	Tissue	Esophagus - Mucosa		1	Unstranded	Paired-end	2x76	32151264	GTEX-13N2G-1226-SM-5IJCI
Human	GTEx	Tissue	Esophagus - Mucosa		1	Unstranded	Paired-end	2x76	41479555	GTEX-13NYB-0926-SM-5IFFA
Human	GTEx	Tissue	Esophagus - Mucosa		1	Unstranded	Paired-end	2x76	38945697	GTEX-13NZB-1226-SM-5J2MW
Human	GTEx	Tissue	Esophagus - Mucosa		1	Unstranded	Paired-end	2x76	29343554	GTEX-13O21-0626-SM-5IJDI
Human	GTEx	Tissue	Esophagus - Mucosa		1	Unstranded	Paired-end	2x76	29236349	GTEX-13O3P-1226-SM-5J2O8
Human	GTEx	Tissue	Esophagus - Mucosa		1	Unstranded	Paired-end	2x76	25772512	GTEX-13O3Q-0826-SM-5IFGF
Human	GTEx	Tissue	Esophagus - Mucosa		1	Unstranded	Paired-end	2x76	33266519	GTEX-13O61-0926-SM-5IFFE
Human	GTEx	Tissue	Esophagus - Mucosa		1	Unstranded	Paired-end	2x76	42026035	GTEX-13OVG-0626-SM-5IFEP
Human	GTEx	Tissue	Esophagus - Mucosa		1	Unstranded	Paired-end	2x76	31439206	GTEX-13OVI-2626-SM-5KM4T
Human	GTEx	Tissue	Esophagus - Mucosa		1	Unstranded	Paired-end	2x76	29089733	GTEX-13OVJ-1226-SM-5L3HA
Human	GTEx	Tissue	Esophagus - Mucosa		1	Unstranded	Paired-end	2x76	32970663	GTEX-13OW8-2326-SM-5L3I9
Human	GTEx	Tissue	Esophagus - Mucosa		1	Unstranded	Paired-end	2x76	29619426	GTEX-13PVQ-1726-SM-5IFF3
Human	GTEx	Tissue	Esophagus - Mucosa		1	Unstranded	Paired-end	2x76	28039814	GTEX-13PVR-1826-SM-5Q5CC
Human	GTEx	Tissue	Esophagus - Mucosa		1	Unstranded	Paired-end	2x76	30631086	GTEX-13QBU-1026-SM-5LU3R
Human	GTEx	Tissue	Esophagus - Mucosa		1	Unstranded	Paired-end	2x76	26723606	GTEX-13QJ3-1726-SM-5RQK9
Human	GTEx	Tissue	Esophagus - Mucosa		1	Unstranded	Paired-end	2x76	26239129	GTEX-13RTK-0526-SM-5S2QF
Human	GTEx	Tissue	Esophagus - Mucosa		1	Unstranded	Paired-end	2x76	36869018	GTEX-13S86-0826-SM-5SI6J
Human	GTEx	Tissue	Esophagus - Mucosa		1	Unstranded	Paired-end	2x76	33787956	GTEX-13SLX-1726-SM-5Q5E5
Human	GTEx	Tissue	Esophagus - Mucosa		1	Unstranded	Paired-end	2x76	30075349	GTEX-13U4I-1126-SM-5LU3S
Human	GTEx	Tissue	Esophagus - Mucosa		1	Unstranded	Paired-end	2x76	42739656	GTEX-13W3W-1626-SM-5LU35
Human	GTEx	Tissue	Esophagus - Mucosa		1	Unstranded	Paired-end	2x76	37571925	GTEX-13W46-1926-SM-5J2MF
Human	GTEx	Tissue	Esophagus - Mucosa		1	Unstranded	Paired-end	2x76	38634612	GTEX-13X6H-1326-SM-5LU42
Human	GTEx	Tissue	Esophagus - Mucosa		1	Unstranded	Paired-end	2x76	31371472	GTEX-13X6I-1026-SM-5LU4C
Human	GTEx	Tissue	Esophagus - Mucosa		1	Unstranded	Paired-end	2x76	45931878	GTEX-13X6K-2126-SM-5O9D4
Human	GTEx	Tissue	Esophagus - Mucosa		1	Unstranded	Paired-end	2x76	35281317	GTEX-144FL-2726-SM-5O98Z
Human	GTEx	Tissue	Esophagus - Mucosa		1	Unstranded	Paired-end	2x76	38956476	GTEX-144GM-1426-SM-5LU31
Human	GTEx	Tissue	Esophagus - Mucosa		1	Unstranded	Paired-end	2x76	36331040	GTEX-144GN-0626-SM-5O9B2
Human	GTEx	Tissue	Esophagus - Mucosa		1	Unstranded	Paired-end	2x76	26872639	GTEX-144GO-2726-SM-5O9A2
Human	GTEx	Tissue	Esophagus - Mucosa		1	Unstranded	Paired-end	2x76	29864635	GTEX-145LS-1826-SM-5LUAZ
Human	GTEx	Tissue	Esophagus - Mucosa		1	Unstranded	Paired-end	2x76	28042228	GTEX-145LT-1126-SM-5LUA1
Human	GTEx	Tissue	Esophagus - Mucosa		1	Unstranded	Paired-end	2x76	26600651	GTEX-145LV-1326-SM-5S2QI
Human	GTEx	Tissue	Esophagus - Mucosa		1	Unstranded	Paired-end	2x76	27790858	GTEX-145ME-0526-SM-5QGQV
Human	GTEx	Tissue	Esophagus - Mucosa		1	Unstranded	Paired-end	2x76	27591518	GTEX-145MF-1426-SM-5O9B6
Human	GTEx	Tissue	Esophagus - Mucosa		1	Unstranded	Paired-end	2x76	42627131	GTEX-145MN-1026-SM-5NQ9G
Human	GTEx	Tissue	Esophagus - Mucosa		1	Unstranded	Paired-end	2x76	31617010	GTEX-145MO-1426-SM-5Q5BS
Human	GTEx	Tissue	Esophagus - Mucosa		1	Unstranded	Paired-end	2x76	27722561	GTEX-146FH-1726-SM-5QGQ2
Human	GTEx	Tissue	Esophagus - Mucosa		1	Unstranded	Paired-end	2x76	26669419	GTEX-146FQ-1026-SM-5LU8I
Human	GTEx	Tissue	Esophagus - Mucosa		1	Unstranded	Paired-end	2x76	38543664	GTEX-146FR-0426-SM-5SI97
Human	GTEx	Tissue	Esophagus - Mucosa		1	Unstranded	Paired-end	2x76	47315338	GTEX-147F3-0826-SM-5NQA7
Human	GTEx	Tissue	Esophagus - Mucosa		1	Unstranded	Paired-end	2x76	28855868	GTEX-148VJ-1026-SM-5LU98
Human	GTEx	Tissue	Esophagus - Mucosa		1	Unstranded	Paired-end	2x76	37166910	GTEX-1497J-2726-SM-5SI9W
Human	GTEx	Tissue	Esophagus - Mucosa		1	Unstranded	Paired-end	2x76	35458364	GTEX-14A5H-1826-SM-5NQAB
Human	GTEx	Tissue	Esophagus - Mucosa		1	Unstranded	Paired-end	2x76	40548001	GTEX-14A6H-1326-SM-5NQBC
Human	GTEx	Tissue	Esophagus - Mucosa		1	Unstranded	Paired-end	2x76	27863983	GTEX-14AS3-0626-SM-5QGQD
Human	GTEx	Tissue	Esophagus - Mucosa		1	Unstranded	Paired-end	2x76	28126563	GTEX-14BIN-2726-SM-5RQIE
Human	GTEx	Tissue	Esophagus - Mucosa		1	Unstranded	Paired-end	2x76	25172356	GTEX-14BMU-0926-SM-5S2QB
Human	GTEx	Tissue	Esophagus - Mucosa		1	Unstranded	Paired-end	2x76	27774722	GTEX-14C38-2126-SM-5RQJO
Human	GTEx	Tissue	Esophagus - Mucosa		1	Unstranded	Paired-end	2x76	29425955	GTEX-14DAQ-1426-SM-5RQJD
Human	GTEx	Tissue	Esophagus - Mucosa		1	Unstranded	Paired-end	2x76	31241889	GTEX-14E1K-1226-SM-5S2PD
Human	GTEx	Tissue	Esophagus - Mucosa		1	Unstranded	Paired-end	2x76	26791973	GTEX-14E6E-0726-SM-5S2R3
Human	GTEx	Tissue	Esophagus - Mucosa		1	Unstranded	Paired-end	2x76	48277079	GTEX-14H4A-1626-SM-5SI69
Human	GTEx	Tissue	Esophagus - Mucosa		1	Unstranded	Paired-end	2x76	30423296	GTEX-14ICL-0526-SM-5RQJ6
Human	GTEx	Tissue	Esophagus - Mucosa		1	Unstranded	Paired-end	2x76	28083137	GTEX-N7MS-1225-SM-3LK5G
Human	GTEx	Tissue	Esophagus - Mucosa		1	Unstranded	Paired-end	2x76	25130659	GTEX-N7MT-0326-SM-48TDP
Human	GTEx	Tissue	Esophagus - Mucosa		1	Unstranded	Paired-end	2x76	26045598	GTEX-NFK9-1126-SM-3LK78
Human	GTEx	Tissue	Esophagus - Mucosa		1	Unstranded	Paired-end	2x76	44582440	GTEX-NPJ8-1926-SM-3MJGB
Human	GTEx	Tissue	Esophagus - Mucosa		1	Unstranded	Paired-end	2x76	37534537	GTEX-O5YV-1026-SM-3LK72
Human	GTEx	Tissue	Esophagus - Mucosa		1	Unstranded	Paired-end	2x76	55108933	GTEX-OHPL-0726-SM-3TW8U
Human	GTEx	Tissue	Esophagus - Mucosa		1	Unstranded	Paired-end	2x76	37220075	GTEX-OIZG-1026-SM-3LK5X
Human	GTEx	Tissue	Esophagus - Mucosa		1	Unstranded	Paired-end	2x76	50854734	GTEX-OIZH-0626-SM-3NB1L
Human	GTEx	Tissue	Esophagus - Mucosa		1	Unstranded	Paired-end	2x76	50940072	GTEX-OIZI-1426-SM-3NB1T
Human	GTEx	Tissue	Esophagus - Mucosa		1	Unstranded	Paired-end	2x76	45146701	GTEX-OOBK-0625-SM-3LK5P
Human	GTEx	Tissue	Esophagus - Mucosa		1	Unstranded	Paired-end	2x76	47594603	GTEX-OXRK-1326-SM-3NB1A
Human	GTEx	Tissue	Esophagus - Mucosa		1	Unstranded	Paired-end	2x76	47865463	GTEX-OXRL-0626-SM-3NM9C
Human	GTEx	Tissue	Esophagus - Mucosa		1	Unstranded	Paired-end	2x76	51380375	GTEX-OXRN-1726-SM-3NM9B
Human	GTEx	Tissue	Esophagus - Mucosa		1	Unstranded	Paired-end	2x76	32530816	GTEX-OXRP-0926-SM-48TC1
Human	GTEx	Tissue	Esophagus - Mucosa		1	Unstranded	Paired-end	2x76	49597671	GTEX-P4PP-0626-SM-3NM9X
Human	GTEx	Tissue	Esophagus - Mucosa		1	Unstranded	Paired-end	2x76	42873265	GTEX-P4PQ-0626-SM-3NMCU
Human	GTEx	Tissue	Esophagus - Mucosa		1	Unstranded	Paired-end	2x76	48168411	GTEX-P4QS-0626-SM-3NMD1
Human	GTEx	Tissue	Esophagus - Mucosa		1	Unstranded	Paired-end	2x76	40997607	GTEX-P4QT-0626-SM-3NMCP
Human	GTEx	Tissue	Esophagus - Mucosa		1	Unstranded	Paired-end	2x76	43079374	GTEX-P78B-1026-SM-3NMC4
Human	GTEx	Tissue	Esophagus - Mucosa		1	Unstranded	Paired-end	2x76	43683808	GTEX-PLZ4-1626-SM-3P618
Human	GTEx	Tissue	Esophagus - Mucosa		1	Unstranded	Paired-end	2x76	53399893	GTEX-PLZ5-0926-SM-3TW8L
Human	GTEx	Tissue	Esophagus - Mucosa		2	Unstranded	Paired-end	2x76	39983137	GTEX-PLZ5-0926-SM-4RGM9
Human	GTEx	Tissue	Esophagus - Mucosa		1	Unstranded	Paired-end	2x76	44005116	GTEX-PLZ6-0526-SM-3P61C
Human	GTEx	Tissue	Esophagus - Mucosa		1	Unstranded	Paired-end	2x76	29620350	GTEX-POYW-1326-SM-48TCG
Human	GTEx	Tissue	Esophagus - Mucosa		1	Unstranded	Paired-end	2x76	30539623	GTEX-PSDG-1326-SM-48TD2
Human	GTEx	Tissue	Esophagus - Mucosa		1	Unstranded	Paired-end	2x76	29193806	GTEX-PVOW-1626-SM-48TC9
Human	GTEx	Tissue	Esophagus - Mucosa		1	Unstranded	Paired-end	2x76	29510509	GTEX-PWCY-0726-SM-48TCS
Human	GTEx	Tissue	Esophagus - Mucosa		1	Unstranded	Paired-end	2x76	29525028	GTEX-PWN1-0626-SM-48TDT
Human	GTEx	Tissue	Esophagus - Mucosa		1	Unstranded	Paired-end	2x76	36665564	GTEX-Q2AG-1326-SM-43V8K
Human	GTEx	Tissue	Esophagus - Mucosa		1	Unstranded	Paired-end	2x76	63616523	GTEX-Q2AH-0826-SM-48TZN
Human	GTEx	Tissue	Esophagus - Mucosa		1	Unstranded	Paired-end	2x76	30052222	GTEX-Q2AI-0626-SM-48TZU
Human	GTEx	Tissue	Esophagus - Mucosa		1	Unstranded	Paired-end	2x76	37030402	GTEX-QCQG-0626-SM-48U21
Human	GTEx	Tissue	Esophagus - Mucosa		1	Unstranded	Paired-end	2x76	29990897	GTEX-QDVJ-0726-SM-48U1W
Human	GTEx	Tissue	Esophagus - Mucosa		1	Unstranded	Paired-end	2x76	59447485	GTEX-QDVN-1026-SM-48TZA
Human	GTEx	Tissue	Esophagus - Mucosa		1	Unstranded	Paired-end	2x76	24374057	GTEX-QEG4-0726-SM-4R1JL
Human	GTEx	Tissue	Esophagus - Mucosa		1	Unstranded	Paired-end	2x76	31139776	GTEX-QEG5-1426-SM-447AS
Human	GTEx	Tissue	Esophagus - Mucosa		1	Unstranded	Paired-end	2x76	24612150	GTEX-QEL4-1426-SM-447AC
Human	GTEx	Tissue	Esophagus - Mucosa		1	Unstranded	Paired-end	2x76	37152864	GTEX-QESD-0826-SM-47J4G
Human	GTEx	Tissue	Esophagus - Mucosa		1	Unstranded	Paired-end	2x76	49394552	GTEX-QLQ7-0926-SM-447BC
Human	GTEx	Tissue	Esophagus - Mucosa		1	Unstranded	Paired-end	2x76	26433363	GTEX-QLQW-0526-SM-4R1KS
Human	GTEx	Tissue	Esophagus - Mucosa		1	Unstranded	Paired-end	2x76	24750770	GTEX-QV31-0426-SM-447C4
Human	GTEx	Tissue	Esophagus - Mucosa		1	Unstranded	Paired-end	2x76	30583156	GTEX-QV44-1126-SM-4R1KO
Human	GTEx	Tissue	Esophagus - Mucosa		1	Unstranded	Paired-end	2x76	25731104	GTEX-QVUS-0626-SM-447CC
Human	GTEx	Tissue	Esophagus - Mucosa		1	Unstranded	Paired-end	2x76	30637644	GTEX-R3RS-1326-SM-48FE7
Human	GTEx	Tissue	Esophagus - Mucosa		1	Unstranded	Paired-end	2x76	27859251	GTEX-R45C-1226-SM-48FEE
Human	GTEx	Tissue	Esophagus - Mucosa		1	Unstranded	Paired-end	2x76	32198959	GTEX-R53T-1126-SM-48FD4
Human	GTEx	Tissue	Esophagus - Mucosa		1	Unstranded	Paired-end	2x76	32537379	GTEX-R55C-0826-SM-48FCL
Human	GTEx	Tissue	Esophagus - Mucosa		1	Unstranded	Paired-end	2x76	35185672	GTEX-R55D-1126-SM-48FEB
Human	GTEx	Tissue	Esophagus - Mucosa		1	Unstranded	Paired-end	2x76	30106133	GTEX-R55E-1326-SM-48FCR
Human	GTEx	Tissue	Esophagus - Mucosa		1	Unstranded	Paired-end	2x76	31143940	GTEX-R55G-1026-SM-48FDI
Human	GTEx	Tissue	Esophagus - Mucosa		1	Unstranded	Paired-end	2x76	27008370	GTEX-REY6-1326-SM-48FDO
Human	GTEx	Tissue	Esophagus - Mucosa		1	Unstranded	Paired-end	2x76	31382921	GTEX-RM2N-0726-SM-48FD5
Human	GTEx	Tissue	Esophagus - Mucosa		1	Unstranded	Paired-end	2x76	26495199	GTEX-RN64-1026-SM-48FDX
Human	GTEx	Tissue	Esophagus - Mucosa		1	Unstranded	Paired-end	2x76	28402675	GTEX-RNOR-1226-SM-48FDQ
Human	GTEx	Tissue	Esophagus - Mucosa		1	Unstranded	Paired-end	2x76	33170082	GTEX-RTLS-1126-SM-46MUQ
Human	GTEx	Tissue	Esophagus - Mucosa		1	Unstranded	Paired-end	2x76	34748507	GTEX-RU1J-0326-SM-46MUM
Human	GTEx	Tissue	Esophagus - Mucosa		1	Unstranded	Paired-end	2x76	30465637	GTEX-RU72-0726-SM-46MUW
Human	GTEx	Tissue	Esophagus - Mucosa		1	Unstranded	Paired-end	2x76	33642143	GTEX-RUSQ-0826-SM-47JWW
Human	GTEx	Tissue	Esophagus - Mucosa		1	Unstranded	Paired-end	2x76	33992458	GTEX-RVPV-0526-SM-47JYL
Human	GTEx	Tissue	Esophagus - Mucosa		1	Unstranded	Paired-end	2x76	30202466	GTEX-RWS6-0826-SM-47JXF
Human	GTEx	Tissue	Esophagus - Mucosa		1	Unstranded	Paired-end	2x76	29623988	GTEX-S32W-0926-SM-4AD5X
Human	GTEx	Tissue	Esophagus - Mucosa		1	Unstranded	Paired-end	2x76	30639002	GTEX-S33H-0826-SM-4AD5Y
Human	GTEx	Tissue	Esophagus - Mucosa		1	Unstranded	Paired-end	2x76	33920409	GTEX-S341-0526-SM-4AD5U
Human	GTEx	Tissue	Esophagus - Mucosa		1	Unstranded	Paired-end	2x76	33002261	GTEX-S3XE-0926-SM-4AD4S
Human	GTEx	Tissue	Esophagus - Mucosa		1	Unstranded	Paired-end	2x76	42814125	GTEX-S4P3-0426-SM-4AD56
Human	GTEx	Tissue	Esophagus - Mucosa		1	Unstranded	Paired-end	2x76	33509524	GTEX-S4Q7-0626-SM-4AD5M
Human	GTEx	Tissue	Esophagus - Mucosa		1	Unstranded	Paired-end	2x76	36484680	GTEX-S4Z8-0826-SM-4AD4J
Human	GTEx	Tissue	Esophagus - Mucosa		1	Unstranded	Paired-end	2x76	31880241	GTEX-S7SF-0926-SM-4AD4M
Human	GTEx	Tissue	Esophagus - Mucosa		1	Unstranded	Paired-end	2x76	40306811	GTEX-S95S-0426-SM-4B64I
Human	GTEx	Tissue	Esophagus - Mucosa		1	Unstranded	Paired-end	2x76	32681431	GTEX-SE5C-1226-SM-4BRWV
Human	GTEx	Tissue	Esophagus - Mucosa		1	Unstranded	Paired-end	2x76	33123559	GTEX-SNMC-0526-SM-4DM69
Human	GTEx	Tissue	Esophagus - Mucosa		1	Unstranded	Paired-end	2x76	27887073	GTEX-SNOS-0626-SM-4DM5F
Human	GTEx	Tissue	Esophagus - Mucosa		1	Unstranded	Paired-end	2x76	32655688	GTEX-SUCS-0726-SM-4DM7J
Human	GTEx	Tissue	Esophagus - Mucosa		1	Unstranded	Paired-end	2x76	26018385	GTEX-T2IS-0826-SM-4DM6L
Human	GTEx	Tissue	Esophagus - Mucosa		1	Unstranded	Paired-end	2x76	25337889	GTEX-T2YK-1326-SM-4DM6S
Human	GTEx	Tissue	Esophagus - Mucosa		1	Unstranded	Paired-end	2x76	28582407	GTEX-T5JC-1726-SM-4DM6U
Human	GTEx	Tissue	Esophagus - Mucosa		1	Unstranded	Paired-end	2x76	29453878	GTEX-T5JW-1326-SM-4DM5G
Human	GTEx	Tissue	Esophagus - Mucosa		1	Unstranded	Paired-end	2x76	24360702	GTEX-T6MO-0526-SM-4DM6R
Human	GTEx	Tissue	Esophagus - Mucosa		1	Unstranded	Paired-end	2x76	25720250	GTEX-T8EM-0526-SM-4DM64
Human	GTEx	Tissue	Esophagus - Mucosa		1	Unstranded	Paired-end	2x76	25894333	GTEX-TKQ1-0326-SM-4DXSM
Human	GTEx	Tissue	Esophagus - Mucosa		1	Unstranded	Paired-end	2x76	27455993	GTEX-TML8-1526-SM-4DXUX
Human	GTEx	Tissue	Esophagus - Mucosa		1	Unstranded	Paired-end	2x76	34023049	GTEX-TMMY-1126-SM-4DXSX
Human	GTEx	Tissue	Esophagus - Mucosa		1	Unstranded	Paired-end	2x76	26101176	GTEX-TSE9-1226-SM-4DXTM
Human	GTEx	Tissue	Esophagus - Mucosa		1	Unstranded	Paired-end	2x76	29417754	GTEX-U3ZH-1026-SM-4DXUZ
Human	GTEx	Tissue	Esophagus - Mucosa		1	Unstranded	Paired-end	2x76	26306287	GTEX-U3ZM-0526-SM-4DXTB
Human	GTEx	Tissue	Esophagus - Mucosa		1	Unstranded	Paired-end	2x76	33041434	GTEX-U3ZN-1726-SM-4DXUQ
Human	GTEx	Tissue	Esophagus - Mucosa		1	Unstranded	Paired-end	2x76	27718027	GTEX-U4B1-0826-SM-4DXTW
Human	GTEx	Tissue	Esophagus - Mucosa		1	Unstranded	Paired-end	2x76	32548330	GTEX-U8XE-1726-SM-4E3IF
Human	GTEx	Tissue	Esophagus - Mucosa		1	Unstranded	Paired-end	2x76	23698178	GTEX-UJHI-0826-SM-4IHLM
Human	GTEx	Tissue	Esophagus - Mucosa		1	Unstranded	Paired-end	2x76	25805511	GTEX-UJMC-0926-SM-4IHLK
Human	GTEx	Tissue	Esophagus - Mucosa		1	Unstranded	Paired-end	2x76	33162655	GTEX-UPIC-1026-SM-4IHLT
Human	GTEx	Tissue	Esophagus - Mucosa		1	Unstranded	Paired-end	2x76	36136944	GTEX-UPK5-1226-SM-4IHL8
Human	GTEx	Tissue	Esophagus - Mucosa		1	Unstranded	Paired-end	2x76	37198825	GTEX-V1D1-1026-SM-4JBHE
Human	GTEx	Tissue	Esophagus - Mucosa		1	Unstranded	Paired-end	2x76	35580423	GTEX-V955-1126-SM-4JBH3
Human	GTEx	Tissue	Esophagus - Mucosa		1	Unstranded	Paired-end	2x76	28179348	GTEX-VJYA-0726-SM-4KL1T
Human	GTEx	Tissue	Esophagus - Mucosa		1	Unstranded	Paired-end	2x76	35701433	GTEX-VUSG-1226-SM-4KKZF
Human	GTEx	Tissue	Esophagus - Mucosa		1	Unstranded	Paired-end	2x76	26997999	GTEX-W5WG-1626-SM-4LMKG
Human	GTEx	Tissue	Esophagus - Mucosa		1	Unstranded	Paired-end	2x76	33825359	GTEX-WEY5-0926-SM-4LMI4
Human	GTEx	Tissue	Esophagus - Mucosa		1	Unstranded	Paired-end	2x76	31344359	GTEX-WFG7-1126-SM-4LMK3
Human	GTEx	Tissue	Esophagus - Mucosa		1	Unstranded	Paired-end	2x76	50876086	GTEX-WFG8-1226-SM-4V6EI
Human	GTEx	Tissue	Esophagus - Mucosa		1	Unstranded	Paired-end	2x76	25630344	GTEX-WFJO-0826-SM-4LVM5
Human	GTEx	Tissue	Esophagus - Mucosa		1	Unstranded	Paired-end	2x76	25019204	GTEX-WFON-0826-SM-4LVMI
Human	GTEx	Tissue	Esophagus - Mucosa		1	Unstranded	Paired-end	2x76	30746179	GTEX-WH7G-0926-SM-4LVMJ
Human	GTEx	Tissue	Esophagus - Mucosa		1	Unstranded	Paired-end	2x76	25668381	GTEX-WHPG-1126-SM-4M1XT
Human	GTEx	Tissue	Esophagus - Mucosa		1	Unstranded	Paired-end	2x76	26209127	GTEX-WHSB-0426-SM-4M1XI
Human	GTEx	Tissue	Esophagus - Mucosa		1	Unstranded	Paired-end	2x76	28079021	GTEX-WHSE-1526-SM-4M1XH
Human	GTEx	Tissue	Esophagus - Mucosa		1	Unstranded	Paired-end	2x76	36011357	GTEX-WHWD-0926-SM-4OORY
Human	GTEx	Tissue	Esophagus - Mucosa		1	Unstranded	Paired-end	2x76	47746272	GTEX-WK11-1026-SM-4OOS8
Human	GTEx	Tissue	Esophagus - Mucosa		1	Unstranded	Paired-end	2x76	39839214	GTEX-WOFM-0626-SM-4OOS3
Human	GTEx	Tissue	Esophagus - Mucosa		1	Unstranded	Paired-end	2x76	37524387	GTEX-WQUQ-1626-SM-4OOSH
Human	GTEx	Tissue	Esophagus - Mucosa		1	Unstranded	Paired-end	2x76	33685164	GTEX-WRHK-0526-SM-4MVOF
Human	GTEx	Tissue	Esophagus - Mucosa		1	Unstranded	Paired-end	2x76	35754451	GTEX-WVLH-1426-SM-4MVNX
Human	GTEx	Tissue	Esophagus - Mucosa		1	Unstranded	Paired-end	2x76	30713972	GTEX-WXYG-1226-SM-4ONCJ
Human	GTEx	Tissue	Esophagus - Mucosa		1	Unstranded	Paired-end	2x76	27593278	GTEX-WYJK-1926-SM-4ONDP
Human	GTEx	Tissue	Esophagus - Mucosa		1	Unstranded	Paired-end	2x76	29467824	GTEX-WYVS-0726-SM-4ONDO
Human	GTEx	Tissue	Esophagus - Mucosa		1	Unstranded	Paired-end	2x76	32763905	GTEX-X15G-0826-SM-4PQZD
Human	GTEx	Tissue	Esophagus - Mucosa		1	Unstranded	Paired-end	2x76	26189844	GTEX-X3Y1-1326-SM-4PQZB
Human	GTEx	Tissue	Esophagus - Mucosa		1	Unstranded	Paired-end	2x76	43782979	GTEX-X4EO-1226-SM-4QARR
Human	GTEx	Tissue	Esophagus - Mucosa		1	Unstranded	Paired-end	2x76	32537510	GTEX-X4EP-1626-SM-4QAS6
Human	GTEx	Tissue	Esophagus - Mucosa		1	Unstranded	Paired-end	2x76	32588759	GTEX-X4LF-0626-SM-4QASB
Human	GTEx	Tissue	Esophagus - Mucosa		1	Unstranded	Paired-end	2x76	30626604	GTEX-X4XY-1726-SM-46MVO
Human	GTEx	Tissue	Esophagus - Mucosa		1	Unstranded	Paired-end	2x76	30294647	GTEX-X585-1226-SM-46MW7
Human	GTEx	Tissue	Esophagus - Mucosa		1	Unstranded	Paired-end	2x76	40050654	GTEX-X5EB-1526-SM-4E3JC
Human	GTEx	Tissue	Esophagus - Mucosa		1	Unstranded	Paired-end	2x76	28272619	GTEX-X62O-2226-SM-46MW3
Human	GTEx	Tissue	Esophagus - Mucosa		1	Unstranded	Paired-end	2x76	30515085	GTEX-X8HC-1426-SM-46MWC
Human	GTEx	Tissue	Esophagus - Mucosa		1	Unstranded	Paired-end	2x76	33892941	GTEX-XBED-1026-SM-48TCB
Human	GTEx	Tissue	Esophagus - Mucosa		1	Unstranded	Paired-end	2x76	27322051	GTEX-XBEW-1326-SM-4AT63
Human	GTEx	Tissue	Esophagus - Mucosa		1	Unstranded	Paired-end	2x76	30500771	GTEX-XGQ4-1526-SM-4AT6H
Human	GTEx	Tissue	Esophagus - Mucosa		1	Unstranded	Paired-end	2x76	59928902	GTEX-XLM4-2326-SM-4TT2D
Human	GTEx	Tissue	Esophagus - Mucosa		1	Unstranded	Paired-end	2x76	28280764	GTEX-XMD2-1326-SM-4YCET
Human	GTEx	Tissue	Esophagus - Mucosa		1	Unstranded	Paired-end	2x76	41898968	GTEX-XMK1-1326-SM-4B65Q
Human	GTEx	Tissue	Esophagus - Mucosa		1	Unstranded	Paired-end	2x76	35506682	GTEX-XOTO-2126-SM-4B64U
Human	GTEx	Tissue	Esophagus - Mucosa		1	Unstranded	Paired-end	2x76	33305805	GTEX-XQ3S-1126-SM-4BOPK
Human	GTEx	Tissue	Esophagus - Mucosa		1	Unstranded	Paired-end	2x76	26829819	GTEX-XQ8I-1526-SM-4BOOH
Human	GTEx	Tissue	Esophagus - Mucosa		1	Unstranded	Paired-end	2x76	25196057	GTEX-XUJ4-1026-SM-4BOPB
Human	GTEx	Tissue	Esophagus - Mucosa		1	Unstranded	Paired-end	2x76	28133252	GTEX-XUZC-0426-SM-4BOPE
Human	GTEx	Tissue	Esophagus - Mucosa		1	Unstranded	Paired-end	2x76	25986178	GTEX-XV7Q-1126-SM-4BRVS
Human	GTEx	Tissue	Esophagus - Mucosa		1	Unstranded	Paired-end	2x76	31664704	GTEX-XXEK-0326-SM-4BRVV
Human	GTEx	Tissue	Esophagus - Mucosa		1	Unstranded	Paired-end	2x76	34131830	GTEX-XYKS-1526-SM-4BRUP
Human	GTEx	Tissue	Esophagus - Mucosa		1	Unstranded	Paired-end	2x76	26654448	GTEX-Y111-1626-SM-57WCY
Human	GTEx	Tissue	Esophagus - Mucosa		1	Unstranded	Paired-end	2x76	90612632	GTEX-Y114-0926-SM-4TT7J
Human	GTEx	Tissue	Esophagus - Mucosa		1	Unstranded	Paired-end	2x76	44973097	GTEX-Y3I4-1226-SM-4TT8N
Human	GTEx	Tissue	Esophagus - Mucosa		1	Unstranded	Paired-end	2x76	39911885	GTEX-Y3IK-1126-SM-51MSV
Human	GTEx	Tissue	Esophagus - Mucosa		1	Unstranded	Paired-end	2x76	41697295	GTEX-Y5LM-1026-SM-4VDSQ
Human	GTEx	Tissue	Esophagus - Mucosa		1	Unstranded	Paired-end	2x76	51302508	GTEX-Y5V5-1626-SM-4VDSG
Human	GTEx	Tissue	Esophagus - Mucosa		1	Unstranded	Paired-end	2x76	43594753	GTEX-Y5V6-1026-SM-4VBS2
Human	GTEx	Tissue	Esophagus - Mucosa		1	Unstranded	Paired-end	2x76	30168878	GTEX-Y8E4-1726-SM-5LU9G
Human	GTEx	Tissue	Esophagus - Mucosa		1	Unstranded	Paired-end	2x76	37132990	GTEX-Y8LW-0726-SM-5IFI1
Human	GTEx	Tissue	Esophagus - Mucosa		1	Unstranded	Paired-end	2x76	41898500	GTEX-Y9LG-0626-SM-4WWDH
Human	GTEx	Tissue	Esophagus - Mucosa		1	Unstranded	Paired-end	2x76	47244424	GTEX-YB5E-0926-SM-4WWDQ
Human	GTEx	Tissue	Esophagus - Mucosa		1	Unstranded	Paired-end	2x76	46347988	GTEX-YEC3-2526-SM-4YCDN
Human	GTEx	Tissue	Esophagus - Mucosa		2	Unstranded	Paired-end	2x76	33311264	GTEX-YEC3-2526-SM-5CVLS
Human	GTEx	Tissue	Esophagus - Mucosa		1	Unstranded	Paired-end	2x76	51486485	GTEX-YEC4-1026-SM-5P9FW
Human	GTEx	Tissue	Esophagus - Mucosa		1	Unstranded	Paired-end	2x76	41003726	GTEX-YECK-1626-SM-5IFHQ
Human	GTEx	Tissue	Esophagus - Mucosa		1	Unstranded	Paired-end	2x76	50627104	GTEX-YF7O-0926-SM-5IFIF
Human	GTEx	Tissue	Esophagus - Mucosa		1	Unstranded	Paired-end	2x76	27508109	GTEX-YFC4-1226-SM-5LU9R
Human	GTEx	Tissue	Esophagus - Mucosa		1	Unstranded	Paired-end	2x76	44024787	GTEX-YJ89-1526-SM-5P9IR
Human	GTEx	Tissue	Esophagus - Mucosa		1	Unstranded	Paired-end	2x76	29223109	GTEX-Z9EW-0526-SM-5HL8S
Human	GTEx	Tissue	Esophagus - Mucosa		1	Unstranded	Paired-end	2x76	35392871	GTEX-ZA64-0626-SM-5HL9O
Human	GTEx	Tissue	Esophagus - Mucosa		1	Unstranded	Paired-end	2x76	29593590	GTEX-ZAB4-1126-SM-5HL86
Human	GTEx	Tissue	Esophagus - Mucosa		1	Unstranded	Paired-end	2x76	30428035	GTEX-ZAB5-0926-SM-5CVMV
Human	GTEx	Tissue	Esophagus - Mucosa		1	Unstranded	Paired-end	2x76	27457757	GTEX-ZAK1-1526-SM-5S2OV
Human	GTEx	Tissue	Esophagus - Mucosa		1	Unstranded	Paired-end	2x76	35566819	GTEX-ZC5H-1326-SM-5HL7E
Human	GTEx	Tissue	Esophagus - Mucosa		1	Unstranded	Paired-end	2x76	44643136	GTEX-ZDTT-1326-SM-4WKFH
Human	GTEx	Tissue	Esophagus - Mucosa		1	Unstranded	Paired-end	2x76	30342353	GTEX-ZDYS-0826-SM-4WWCR
Human	GTEx	Tissue	Esophagus - Mucosa		1	Unstranded	Paired-end	2x76	41809273	GTEX-ZE9C-1126-SM-4WWBD
Human	GTEx	Tissue	Esophagus - Mucosa		1	Unstranded	Paired-end	2x76	50692520	GTEX-ZEX8-1426-SM-4WKHQ
Human	GTEx	Tissue	Esophagus - Mucosa		1	Unstranded	Paired-end	2x76	33100352	GTEX-ZF29-1326-SM-4WWB6
Human	GTEx	Tissue	Esophagus - Mucosa		1	Unstranded	Paired-end	2x76	46379380	GTEX-ZF2S-1226-SM-4WWAX
Human	GTEx	Tissue	Esophagus - Mucosa		1	Unstranded	Paired-end	2x76	45173905	GTEX-ZF3C-1626-SM-4WWB4
Human	GTEx	Tissue	Esophagus - Mucosa		1	Unstranded	Paired-end	2x76	37312597	GTEX-ZG7Y-1126-SM-4WWEZ
Human	GTEx	Tissue	Esophagus - Mucosa		1	Unstranded	Paired-end	2x76	43427722	GTEX-ZGAY-1126-SM-4WWBS
Human	GTEx	Tissue	Esophagus - Mucosa		1	Unstranded	Paired-end	2x76	35114491	GTEX-ZLV1-0526-SM-4WWD4
Human	GTEx	Tissue	Esophagus - Mucosa		1	Unstranded	Paired-end	2x76	32098210	GTEX-ZP4G-1026-SM-4YCE1
Human	GTEx	Tissue	Esophagus - Mucosa		1	Unstranded	Paired-end	2x76	42527299	GTEX-ZPCL-1426-SM-57WEC
Human	GTEx	Tissue	Esophagus - Mucosa		1	Unstranded	Paired-end	2x76	39105246	GTEX-ZPU1-1426-SM-4WWFU
Human	GTEx	Tissue	Esophagus - Mucosa		1	Unstranded	Paired-end	2x76	26842218	GTEX-ZQG8-2226-SM-5DUWD
Human	GTEx	Tissue	Esophagus - Mucosa		1	Unstranded	Paired-end	2x76	55346318	GTEX-ZQUD-0426-SM-57WFR
Human	GTEx	Tissue	Esophagus - Mucosa		1	Unstranded	Paired-end	2x76	31998834	GTEX-ZT9W-1326-SM-51MTB
Human	GTEx	Tissue	Esophagus - Mucosa		1	Unstranded	Paired-end	2x76	33541959	GTEX-ZT9X-0526-SM-5GCOP
Human	GTEx	Tissue	Esophagus - Mucosa		1	Unstranded	Paired-end	2x76	32315494	GTEX-ZTPG-1626-SM-5DUX2
Human	GTEx	Tissue	Esophagus - Mucosa		1	Unstranded	Paired-end	2x76	32375978	GTEX-ZTSS-0626-SM-59867
Human	GTEx	Tissue	Esophagus - Mucosa		1	Unstranded	Paired-end	2x76	35294319	GTEX-ZTX8-0226-SM-5E44D
Human	GTEx	Tissue	Esophagus - Mucosa		1	Unstranded	Paired-end	2x76	33064993	GTEX-ZUA1-1226-SM-5NQ6O
Human	GTEx	Tissue	Esophagus - Mucosa		1	Unstranded	Paired-end	2x76	46108042	GTEX-ZV68-0926-SM-59HK7
Human	GTEx	Tissue	Esophagus - Mucosa		1	Unstranded	Paired-end	2x76	33295442	GTEX-ZVE2-1326-SM-5NQ94
Human	GTEx	Tissue	Esophagus - Mucosa		1	Unstranded	Paired-end	2x76	43851327	GTEX-ZVP2-1326-SM-57WCE
Human	GTEx	Tissue	Esophagus - Mucosa		1	Unstranded	Paired-end	2x76	34479965	GTEX-ZVT2-1326-SM-5E45H
Human	GTEx	Tissue	Esophagus - Mucosa		1	Unstranded	Paired-end	2x76	32475629	GTEX-ZVT3-1426-SM-59HLP
Human	GTEx	Tissue	Esophagus - Mucosa		1	Unstranded	Paired-end	2x76	36598341	GTEX-ZXES-1126-SM-5GZXN
Human	GTEx	Tissue	Esophagus - Mucosa		1	Unstranded	Paired-end	2x76	31367735	GTEX-ZY6K-0626-SM-59HJL
Human	GTEx	Tissue	Esophagus - Mucosa		1	Unstranded	Paired-end	2x76	45294269	GTEX-ZYFC-1626-SM-5N9EU
Human	GTEx	Tissue	Esophagus - Mucosa		1	Unstranded	Paired-end	2x76	29895597	GTEX-ZYFG-1126-SM-5GICY
Human	GTEx	Tissue	Esophagus - Mucosa		1	Unstranded	Paired-end	2x76	37303259	GTEX-ZYT6-1126-SM-5GZYR
Human	GTEx	Tissue	Esophagus - Mucosa		1	Unstranded	Paired-end	2x76	49552160	GTEX-ZYVF-2226-SM-5GIDD
Human	GTEx	Tissue	Esophagus - Mucosa		1	Unstranded	Paired-end	2x76	38912500	GTEX-ZYW4-1326-SM-5E45N
Human	GTEx	Tissue	Esophagus - Mucosa		1	Unstranded	Paired-end	2x76	35602377	GTEX-ZYWO-1026-SM-5E45U
Human	GTEx	Tissue	Esophagus - Mucosa		1	Unstranded	Paired-end	2x76	35805471	GTEX-ZYY3-1526-SM-5SIA9
Human	GTEx	Tissue	Esophagus - Mucosa		1	Unstranded	Paired-end	2x76	29925122	GTEX-ZZ64-0226-SM-5E44X
Human	GTEx	Tissue	Esophagus - Mucosa		1	Unstranded	Paired-end	2x76	37155966	GTEX-ZZPT-1426-SM-5N9C5
Human	GTEx	Tissue	Kidney		1	Unstranded	Paired-end	2x76	52144963	GTEX-11GS4-2326-SM-5A5KS
Human	GTEx	Tissue	Kidney		1	Unstranded	Paired-end	2x76	43178092	GTEX-11OF3-1326-SM-5N9FJ
Human	GTEx	Tissue	Kidney		1	Unstranded	Paired-end	2x76	45204505	GTEX-11PRG-2226-SM-5GU5R
Human	GTEx	Tissue	Kidney		1	Unstranded	Paired-end	2x76	35459444	GTEX-11TTK-1926-SM-5PNW8
Human	GTEx	Tissue	Kidney		1	Unstranded	Paired-end	2x76	31961399	GTEX-12696-0926-SM-5FQTV
Human	GTEx	Tissue	Kidney		1	Unstranded	Paired-end	2x76	27887841	GTEX-12WSG-0826-SM-5EQ5A
Human	GTEx	Tissue	Kidney		1	Unstranded	Paired-end	2x76	29585533	GTEX-13112-2126-SM-5GCO4
Human	GTEx	Tissue	Kidney		1	Unstranded	Paired-end	2x76	45654336	GTEX-1399S-0526-SM-5IJG8
Human	GTEx	Tissue	Kidney		1	Unstranded	Paired-end	2x76	43562467	GTEX-13NYB-1726-SM-5N9G2
Human	GTEx	Tissue	Kidney		1	Unstranded	Paired-end	2x76	44580995	GTEX-13O1R-2526-SM-5N9FW
Human	GTEx	Tissue	Kidney		1	Unstranded	Paired-end	2x76	41564600	GTEX-13OVI-1126-SM-5KLZF
Human	GTEx	Tissue	Kidney		1	Unstranded	Paired-end	2x76	34954256	GTEX-13OVL-1826-SM-5KLZR
Human	GTEx	Tissue	Kidney		1	Unstranded	Paired-end	2x76	42181968	GTEX-13OW6-1826-SM-5N9F9
Human	GTEx	Tissue	Kidney		1	Unstranded	Paired-end	2x76	25395639	GTEX-13RTJ-2226-SM-5S2Q1
Human	GTEx	Tissue	Kidney		1	Unstranded	Paired-end	2x76	25582072	GTEX-145MN-0326-SM-5QGQI
Human	GTEx	Tissue	Kidney		1	Unstranded	Paired-end	2x76	37224373	GTEX-147F4-2626-SM-5Q5CS
Human	GTEx	Tissue	Kidney		1	Unstranded	Paired-end	2x76	33791877	GTEX-1497J-0826-SM-5NQAJ
Human	GTEx	Tissue	Kidney		1	Unstranded	Paired-end	2x76	34052207	GTEX-N7MS-1626-SM-3LK5F
Human	GTEx	Tissue	Kidney		1	Unstranded	Paired-end	2x76	45574223	GTEX-NPJ8-2226-SM-3TW8D
Human	GTEx	Tissue	Kidney		1	Unstranded	Paired-end	2x76	59283141	GTEX-P4QS-1126-SM-3NMD5
Human	GTEx	Tissue	Kidney		1	Unstranded	Paired-end	2x76	37211128	GTEX-QDVN-1626-SM-48TZC
Human	GTEx	Tissue	Kidney		1	Unstranded	Paired-end	2x76	32163467	GTEX-QLQW-1626-SM-4R1K1
Human	GTEx	Tissue	Kidney		1	Unstranded	Paired-end	2x76	33772649	GTEX-RN64-1626-SM-48FD7
Human	GTEx	Tissue	Kidney		1	Unstranded	Paired-end	2x76	34125983	GTEX-T5JC-1526-SM-4DM68
Human	GTEx	Tissue	Kidney		1	Unstranded	Paired-end	2x76	25898656	GTEX-UPIC-1126-SM-4IHLO
Human	GTEx	Tissue	Kidney		1	Unstranded	Paired-end	2x76	47273182	GTEX-WI4N-2026-SM-4OOS7
Human	GTEx	Tissue	Kidney		1	Unstranded	Paired-end	2x76	44272735	GTEX-XPVG-0526-SM-4B65N
Human	GTEx	Tissue	Kidney		1	Unstranded	Paired-end	2x76	36942964	GTEX-Y5V6-2026-SM-5IFHO
Human	GTEx	Tissue	Kidney		1	Unstranded	Paired-end	2x76	35817953	GTEX-ZC5H-1726-SM-5HL7X
Human	GTEx	Tissue	Kidney		1	Unstranded	Paired-end	2x76	37976241	GTEX-ZDXO-0226-SM-4WKH7
Human	GTEx	Tissue	Kidney		1	Unstranded	Paired-end	2x76	32773764	GTEX-ZE9C-1426-SM-4WKGM
Human	GTEx	Tissue	Kidney		1	Unstranded	Paired-end	2x76	47461334	GTEX-ZLFU-0926-SM-5P9F8
Human	GTEx	Tissue	Kidney		1	Unstranded	Paired-end	2x76	28263475	GTEX-ZVZP-0926-SM-5GIDB
Human	GTEx	Tissue	Kidney		1	Unstranded	Paired-end	2x76	31695447	GTEX-ZYFD-1526-SM-5NQ7T
Human	GTEx	Tissue	Kidney		1	Unstranded	Paired-end	2x76	37319227	GTEX-ZYFG-1626-SM-5GZYY
Human	GTEx	Tissue	Kidney		1	Unstranded	Paired-end	2x76	34522486	GTEX-ZYT6-2226-SM-5GIC9
Human	GTEx	Tissue	Liver		1	Unstranded	Paired-end	2x76	30079051	GTEX-1192X-1026-SM-5H12P
Human	GTEx	Tissue	Liver		1	Unstranded	Paired-end	2x76	34592152	GTEX-11DXY-0526-SM-5EGGQ
Human	GTEx	Tissue	Liver		1	Unstranded	Paired-end	2x76	26523060	GTEX-11DXZ-0126-SM-5EGGY
Human	GTEx	Tissue	Liver		1	Unstranded	Paired-end	2x76	41687322	GTEX-11EQ9-0526-SM-5A5JZ
Human	GTEx	Tissue	Liver		1	Unstranded	Paired-end	2x76	29144127	GTEX-11GSP-0626-SM-5986T
Human	GTEx	Tissue	Liver		1	Unstranded	Paired-end	2x76	47775910	GTEX-11NUK-1226-SM-5P9GM
Human	GTEx	Tissue	Liver		1	Unstranded	Paired-end	2x76	41593173	GTEX-11NV4-1326-SM-5HL6V
Human	GTEx	Tissue	Liver		1	Unstranded	Paired-end	2x76	26828478	GTEX-11OF3-0726-SM-5BC4Z
Human	GTEx	Tissue	Liver		1	Unstranded	Paired-end	2x76	28285344	GTEX-11TT1-1726-SM-5EQLJ
Human	GTEx	Tissue	Liver		1	Unstranded	Paired-end	2x76	31005792	GTEX-11TUW-1726-SM-5BC5C
Human	GTEx	Tissue	Liver		1	Unstranded	Paired-end	2x76	31500411	GTEX-11UD2-1626-SM-5EQM3
Human	GTEx	Tissue	Liver		1	Unstranded	Paired-end	2x76	33580015	GTEX-11WQC-0726-SM-5EQMR
Human	GTEx	Tissue	Liver		1	Unstranded	Paired-end	2x76	58253657	GTEX-11ZTS-1426-SM-5EQMM
Human	GTEx	Tissue	Liver		1	Unstranded	Paired-end	2x76	30688696	GTEX-11ZUS-2526-SM-59872
Human	GTEx	Tissue	Liver		1	Unstranded	Paired-end	2x76	36157815	GTEX-11ZVC-0726-SM-5FQT9
Human	GTEx	Tissue	Liver		1	Unstranded	Paired-end	2x76	26309245	GTEX-1212Z-0226-SM-59HLF
Human	GTEx	Tissue	Liver		1	Unstranded	Paired-end	2x76	27276178	GTEX-12696-0826-SM-5EGGE
Human	GTEx	Tissue	Liver		1	Unstranded	Paired-end	2x76	33299680	GTEX-1269C-0626-SM-5FQSS
Human	GTEx	Tissue	Liver		1	Unstranded	Paired-end	2x76	29112284	GTEX-12KS4-1326-SM-5LUB3
Human	GTEx	Tissue	Liver		1	Unstranded	Paired-end	2x76	33919239	GTEX-12WSD-1426-SM-5GCN9
Human	GTEx	Tissue	Liver		1	Unstranded	Paired-end	2x76	34965439	GTEX-12WSG-0626-SM-5FQTQ
Human	GTEx	Tissue	Liver		1	Unstranded	Paired-end	2x76	25472932	GTEX-12WSI-0226-SM-5GCNA
Human	GTEx	Tissue	Liver		1	Unstranded	Paired-end	2x76	30441169	GTEX-12WSL-0226-SM-5CVMJ
Human	GTEx	Tissue	Liver		1	Unstranded	Paired-end	2x76	36438538	GTEX-12WSM-0726-SM-5GCOW
Human	GTEx	Tissue	Liver		1	Unstranded	Paired-end	2x76	32624360	GTEX-12ZZZ-1326-SM-59HKW
Human	GTEx	Tissue	Liver		1	Unstranded	Paired-end	2x76	28577236	GTEX-13112-1426-SM-5EGH8
Human	GTEx	Tissue	Liver		1	Unstranded	Paired-end	2x76	30131686	GTEX-13113-1326-SM-5GCOI
Human	GTEx	Tissue	Liver		1	Unstranded	Paired-end	2x76	27709436	GTEX-131XE-0326-SM-5LZVO
Human	GTEx	Tissue	Liver		1	Unstranded	Paired-end	2x76	30448811	GTEX-131XH-0626-SM-5LZWH
Human	GTEx	Tissue	Liver		1	Unstranded	Paired-end	2x76	29459634	GTEX-131YS-1626-SM-5HL6C
Human	GTEx	Tissue	Liver		1	Unstranded	Paired-end	2x76	32534154	GTEX-132AR-0426-SM-5IFH8
Human	GTEx	Tissue	Liver		1	Unstranded	Paired-end	2x76	61883391	GTEX-132NY-0926-SM-5P9G3
Human	GTEx	Tissue	Liver		1	Unstranded	Paired-end	2x76	37233707	GTEX-1399T-0826-SM-5IFES
Human	GTEx	Tissue	Liver		1	Unstranded	Paired-end	2x76	37032988	GTEX-139TS-1426-SM-5IFJD
Human	GTEx	Tissue	Liver		1	Unstranded	Paired-end	2x76	35170549	GTEX-139TU-0826-SM-5IJFG
Human	GTEx	Tissue	Liver		1	Unstranded	Paired-end	2x76	40164048	GTEX-139UC-1426-SM-5IJGH
Human	GTEx	Tissue	Liver		1	Unstranded	Paired-end	2x76	37283029	GTEX-139YR-0226-SM-5IFEM
Human	GTEx	Tissue	Liver		1	Unstranded	Paired-end	2x76	65444990	GTEX-13FLV-0326-SM-5N9DJ
Human	GTEx	Tissue	Liver		1	Unstranded	Paired-end	2x76	40080373	GTEX-13FTW-1126-SM-5J2NV
Human	GTEx	Tissue	Liver		1	Unstranded	Paired-end	2x76	37979470	GTEX-13FTZ-0726-SM-5IFFY
Human	GTEx	Tissue	Liver		1	Unstranded	Paired-end	2x76	43373626	GTEX-13N11-0926-SM-5IJG2
Human	GTEx	Tissue	Liver		1	Unstranded	Paired-end	2x76	29218840	GTEX-13N2G-0926-SM-5IFGJ
Human	GTEx	Tissue	Liver		1	Unstranded	Paired-end	2x76	30811800	GTEX-13NYB-1026-SM-5IFH3
Human	GTEx	Tissue	Liver		1	Unstranded	Paired-end	2x76	38407397	GTEX-13NZ9-1326-SM-5MR3V
Human	GTEx	Tissue	Liver		1	Unstranded	Paired-end	2x76	32660732	GTEX-13NZB-0626-SM-5IFH6
Human	GTEx	Tissue	Liver		1	Unstranded	Paired-end	2x76	36917286	GTEX-13O1R-2026-SM-5KM3N
Human	GTEx	Tissue	Liver		1	Unstranded	Paired-end	2x76	30943240	GTEX-13O3O-1826-SM-5IFGW
Human	GTEx	Tissue	Liver		1	Unstranded	Paired-end	2x76	26766102	GTEX-13OVJ-1026-SM-5IFGI
Human	GTEx	Tissue	Liver		1	Unstranded	Paired-end	2x76	35404397	GTEX-13OW6-2626-SM-5IFF2
Human	GTEx	Tissue	Liver		1	Unstranded	Paired-end	2x76	32295051	GTEX-13PVQ-1526-SM-5IFEQ
Human	GTEx	Tissue	Liver		1	Unstranded	Paired-end	2x76	23148065	GTEX-13PVR-0126-SM-5S2PY
Human	GTEx	Tissue	Liver		1	Unstranded	Paired-end	2x76	30490076	GTEX-13QJC-0726-SM-5RQJK
Human	GTEx	Tissue	Liver		1	Unstranded	Paired-end	2x76	24580159	GTEX-13SLX-1226-SM-5S2Q6
Human	GTEx	Tissue	Liver		1	Unstranded	Paired-end	2x76	27062996	GTEX-13VXU-0926-SM-5IFFH
Human	GTEx	Tissue	Liver		1	Unstranded	Paired-end	2x76	35536470	GTEX-144GM-1326-SM-5LU5E
Human	GTEx	Tissue	Liver		1	Unstranded	Paired-end	2x76	28913527	GTEX-145LU-1326-SM-5LU9N
Human	GTEx	Tissue	Liver		1	Unstranded	Paired-end	2x76	24969762	GTEX-145MF-0826-SM-5QGQA
Human	GTEx	Tissue	Liver		1	Unstranded	Paired-end	2x76	41990173	GTEX-145MO-2326-SM-5NQ9K
Human	GTEx	Tissue	Liver		1	Unstranded	Paired-end	2x76	37808026	GTEX-146FH-1526-SM-5NQBU
Human	GTEx	Tissue	Liver		1	Unstranded	Paired-end	2x76	41275102	GTEX-14753-1626-SM-5NQ9L
Human	GTEx	Tissue	Liver		1	Unstranded	Paired-end	2x76	25777084	GTEX-147F4-1426-SM-5LUA8
Human	GTEx	Tissue	Liver		1	Unstranded	Paired-end	2x76	28148278	GTEX-147JS-1126-SM-5RQIW
Human	GTEx	Tissue	Liver		1	Unstranded	Paired-end	2x76	36979095	GTEX-1497J-0726-SM-5Q5D1
Human	GTEx	Tissue	Liver		1	Unstranded	Paired-end	2x76	30188104	GTEX-14A5I-1726-SM-5QGQ5
Human	GTEx	Tissue	Liver		1	Unstranded	Paired-end	2x76	32891940	GTEX-14AS3-0126-SM-5Q5F4
Human	GTEx	Tissue	Liver		1	Unstranded	Paired-end	2x76	34054628	GTEX-14C38-1526-SM-5RQJ7
Human	GTEx	Tissue	Liver		1	Unstranded	Paired-end	2x76	24954811	GTEX-14DAQ-1726-SM-5S2R2
Human	GTEx	Tissue	Liver		1	Unstranded	Paired-end	2x76	27823260	GTEX-14E1K-0326-SM-5S2PE
Human	GTEx	Tissue	Liver		1	Unstranded	Paired-end	2x76	54971380	GTEX-O5YT-0826-SM-3TW8N
Human	GTEx	Tissue	Liver		1	Unstranded	Paired-end	2x76	44370298	GTEX-OOBJ-0826-SM-3NB2K
Human	GTEx	Tissue	Liver		1	Unstranded	Paired-end	2x76	44413520	GTEX-P44G-1126-SM-3NM9D
Human	GTEx	Tissue	Liver		1	Unstranded	Paired-end	2x76	45683838	GTEX-P78B-1326-SM-3P611
Human	GTEx	Tissue	Liver		1	Unstranded	Paired-end	2x76	24294534	GTEX-PWOO-0826-SM-48TCL
Human	GTEx	Tissue	Liver		1	Unstranded	Paired-end	2x76	29665719	GTEX-PX3G-0826-SM-48TZS
Human	GTEx	Tissue	Liver		1	Unstranded	Paired-end	2x76	28840306	GTEX-Q2AG-1126-SM-48U1P
Human	GTEx	Tissue	Liver		1	Unstranded	Paired-end	2x76	37240507	GTEX-Q734-0326-SM-48U15
Human	GTEx	Tissue	Liver		1	Unstranded	Paired-end	2x76	30431103	GTEX-QDVN-0826-SM-48TZ2
Human	GTEx	Tissue	Liver		1	Unstranded	Paired-end	2x76	26405326	GTEX-QEG4-1826-SM-4R1JN
Human	GTEx	Tissue	Liver		1	Unstranded	Paired-end	2x76	23805747	GTEX-QESD-2026-SM-447BI
Human	GTEx	Tissue	Liver		1	Unstranded	Paired-end	2x76	25245051	GTEX-QV44-0326-SM-4R1KD
Human	GTEx	Tissue	Liver		1	Unstranded	Paired-end	2x76	29799152	GTEX-R53T-0326-SM-48FEC
Human	GTEx	Tissue	Liver		1	Unstranded	Paired-end	2x76	32393832	GTEX-REY6-1226-SM-48FDR
Human	GTEx	Tissue	Liver		1	Unstranded	Paired-end	2x76	31840212	GTEX-RM2N-1926-SM-48FCU
Human	GTEx	Tissue	Liver		1	Unstranded	Paired-end	2x76	25452881	GTEX-RN64-1826-SM-48FDV
Human	GTEx	Tissue	Liver		1	Unstranded	Paired-end	2x76	30056874	GTEX-RNOR-1426-SM-48FDJ
Human	GTEx	Tissue	Liver		1	Unstranded	Paired-end	2x76	32667790	GTEX-RTLS-1326-SM-46MUN
Human	GTEx	Tissue	Liver		1	Unstranded	Paired-end	2x76	28069440	GTEX-RU72-1426-SM-46MUF
Human	GTEx	Tissue	Liver		1	Unstranded	Paired-end	2x76	36734309	GTEX-RWSA-1426-SM-47JXA
Human	GTEx	Tissue	Liver		1	Unstranded	Paired-end	2x76	34792408	GTEX-S32W-1926-SM-4AD63
Human	GTEx	Tissue	Liver		1	Unstranded	Paired-end	2x76	30081319	GTEX-S33H-1626-SM-4AD68
Human	GTEx	Tissue	Liver		1	Unstranded	Paired-end	2x76	34087732	GTEX-S4Z8-0526-SM-4AD4T
Human	GTEx	Tissue	Liver		1	Unstranded	Paired-end	2x76	32473322	GTEX-SJXC-1226-SM-4DM78
Human	GTEx	Tissue	Liver		1	Unstranded	Paired-end	2x76	40863489	GTEX-T6MN-1226-SM-3NMA5
Human	GTEx	Tissue	Liver		1	Unstranded	Paired-end	2x76	33252765	GTEX-TKQ2-1726-SM-4DXUP
Human	GTEx	Tissue	Liver		1	Unstranded	Paired-end	2x76	48826345	GTEX-U3ZN-0226-SM-3DB8D
Human	GTEx	Tissue	Liver		1	Unstranded	Paired-end	2x76	41132077	GTEX-U8XE-1526-SM-4E3HT
Human	GTEx	Tissue	Liver		1	Unstranded	Paired-end	2x76	30934696	GTEX-UPIC-0926-SM-4IHLV
Human	GTEx	Tissue	Liver		1	Unstranded	Paired-end	2x76	43576706	GTEX-UPK5-1426-SM-4JBHH
Human	GTEx	Tissue	Liver		1	Unstranded	Paired-end	2x76	29873984	GTEX-UTHO-2426-SM-4JBHD
Human	GTEx	Tissue	Liver		1	Unstranded	Paired-end	2x76	40162605	GTEX-VUSG-0126-SM-4KL1X
Human	GTEx	Tissue	Liver		1	Unstranded	Paired-end	2x76	29264850	GTEX-WFON-1726-SM-4LVMQ
Human	GTEx	Tissue	Liver		1	Unstranded	Paired-end	2x76	26915514	GTEX-WQUQ-1926-SM-4OOSA
Human	GTEx	Tissue	Liver		1	Unstranded	Paired-end	2x76	33098724	GTEX-WY7C-0726-SM-4ONCB
Human	GTEx	Tissue	Liver		1	Unstranded	Paired-end	2x76	25526979	GTEX-WZTO-0626-SM-4PQYY
Human	GTEx	Tissue	Liver		1	Unstranded	Paired-end	2x76	23835234	GTEX-X261-1726-SM-4PQYT
Human	GTEx	Tissue	Liver		1	Unstranded	Paired-end	2x76	26120509	GTEX-X3Y1-2726-SM-4PQZH
Human	GTEx	Tissue	Liver		1	Unstranded	Paired-end	2x76	28071840	GTEX-X4EO-1126-SM-4QARQ
Human	GTEx	Tissue	Liver		1	Unstranded	Paired-end	2x76	33484145	GTEX-X4EP-1026-SM-4QAS5
Human	GTEx	Tissue	Liver		1	Unstranded	Paired-end	2x76	32060044	GTEX-X4XY-1626-SM-46MVN
Human	GTEx	Tissue	Liver		1	Unstranded	Paired-end	2x76	25987978	GTEX-XBEC-1526-SM-4AT68
Human	GTEx	Tissue	Liver		1	Unstranded	Paired-end	2x76	39412294	GTEX-XOTO-0826-SM-4B65O
Human	GTEx	Tissue	Liver		1	Unstranded	Paired-end	2x76	29778180	GTEX-XXEK-1126-SM-4BRUX
Human	GTEx	Tissue	Liver		1	Unstranded	Paired-end	2x76	48779228	GTEX-Y5LM-0426-SM-4VBRO
Human	GTEx	Tissue	Liver		1	Unstranded	Paired-end	2x76	46052035	GTEX-Y5V5-0926-SM-4VBPZ
Human	GTEx	Tissue	Liver		1	Unstranded	Paired-end	2x76	42977384	GTEX-YB5E-0326-SM-5IFHU
Human	GTEx	Tissue	Liver		1	Unstranded	Paired-end	2x76	54909516	GTEX-YEC4-0826-SM-5P9FV
Human	GTEx	Tissue	Liver		1	Unstranded	Paired-end	2x76	72743455	GTEX-YECK-1926-SM-4W21H
Human	GTEx	Tissue	Liver		1	Unstranded	Paired-end	2x76	36794227	GTEX-YFC4-1526-SM-5IFJS
Human	GTEx	Tissue	Liver		1	Unstranded	Paired-end	2x76	29937484	GTEX-Z9EW-0426-SM-5CVM9
Human	GTEx	Tissue	Liver		1	Unstranded	Paired-end	2x76	29062573	GTEX-ZAB4-0826-SM-5LU9D
Human	GTEx	Tissue	Liver		1	Unstranded	Paired-end	2x76	37903244	GTEX-ZAB5-0426-SM-5CVMI
Human	GTEx	Tissue	Liver		1	Unstranded	Paired-end	2x76	26458054	GTEX-ZEX8-0826-SM-4WKHK
Human	GTEx	Tissue	Liver		1	Unstranded	Paired-end	2x76	47473473	GTEX-ZF29-2026-SM-4WWB7
Human	GTEx	Tissue	Liver		1	Unstranded	Paired-end	2x76	32006375	GTEX-ZF2S-3026-SM-4WWCH
Human	GTEx	Tissue	Liver		1	Unstranded	Paired-end	2x76	39867007	GTEX-ZPU1-0826-SM-57WG2
Human	GTEx	Tissue	Liver		1	Unstranded	Paired-end	2x76	33376486	GTEX-ZTPG-1426-SM-51MT3
Human	GTEx	Tissue	Liver		1	Unstranded	Paired-end	2x76	33443939	GTEX-ZVP2-0626-SM-51MSO
Human	GTEx	Tissue	Liver		1	Unstranded	Paired-end	2x76	29016431	GTEX-ZVT3-1626-SM-5GU66
Human	GTEx	Tissue	Liver		1	Unstranded	Paired-end	2x76	31416186	GTEX-ZVT4-0626-SM-5E45T
Human	GTEx	Tissue	Liver		1	Unstranded	Paired-end	2x76	36054202	GTEX-ZYT6-0626-SM-5E45V
Human	GTEx	Tissue	Liver		1	Unstranded	Paired-end	2x76	34822609	GTEX-ZYY3-0626-SM-5NQ6W
Human	GTEx	Tissue	Liver		1	Unstranded	Paired-end	2x76	32427749	GTEX-ZZPU-0426-SM-5GZYH
Human	GTEx	Tissue	Lung		1	Unstranded	Paired-end	2x76	37442900	GTEX-111CU-0326-SM-5GZXO
Human	GTEx	Tissue	Lung		1	Unstranded	Paired-end	2x76	30718225	GTEX-111FC-1126-SM-5GZWU
Human	GTEx	Tissue	Lung		1	Unstranded	Paired-end	2x76	45943385	GTEX-111VG-0726-SM-5GIDC
Human	GTEx	Tissue	Lung		1	Unstranded	Paired-end	2x76	36212962	GTEX-111YS-0626-SM-5GZXV
Human	GTEx	Tissue	Lung		1	Unstranded	Paired-end	2x76	34396770	GTEX-1122O-0126-SM-5GICA
Human	GTEx	Tissue	Lung		1	Unstranded	Paired-end	2x76	34215247	GTEX-1128S-0726-SM-5N9D6
Human	GTEx	Tissue	Lung		1	Unstranded	Paired-end	2x76	34094921	GTEX-117YW-0526-SM-5H11C
Human	GTEx	Tissue	Lung		1	Unstranded	Paired-end	2x76	36767019	GTEX-117YX-1326-SM-5H125
Human	GTEx	Tissue	Lung		1	Unstranded	Paired-end	2x76	30967515	GTEX-11DXX-0626-SM-5Q5AG
Human	GTEx	Tissue	Lung		1	Unstranded	Paired-end	2x76	34244437	GTEX-11DXZ-0726-SM-5N9C4
Human	GTEx	Tissue	Lung		1	Unstranded	Paired-end	2x76	30697736	GTEX-11DZ1-0426-SM-5H11A
Human	GTEx	Tissue	Lung		1	Unstranded	Paired-end	2x76	27352491	GTEX-11EI6-0826-SM-5985V
Human	GTEx	Tissue	Lung		1	Unstranded	Paired-end	2x76	35387010	GTEX-11EMC-0126-SM-5EGKV
Human	GTEx	Tissue	Lung		1	Unstranded	Paired-end	2x76	35420738	GTEX-11EQ9-0226-SM-5A5JX
Human	GTEx	Tissue	Lung		1	Unstranded	Paired-end	2x76	31925516	GTEX-11GSP-0726-SM-5986L
Human	GTEx	Tissue	Lung		1	Unstranded	Paired-end	2x76	34562032	GTEX-11I78-0126-SM-5HL6F
Human	GTEx	Tissue	Lung		1	Unstranded	Paired-end	2x76	28408912	GTEX-11ILO-0726-SM-5HL5I
Human	GTEx	Tissue	Lung		1	Unstranded	Paired-end	2x76	37013269	GTEX-11LCK-0426-SM-5A5M8
Human	GTEx	Tissue	Lung		1	Unstranded	Paired-end	2x76	31694306	GTEX-11NSD-0326-SM-5A5LS
Human	GTEx	Tissue	Lung		1	Unstranded	Paired-end	2x76	39261868	GTEX-11NUK-0826-SM-5HL4U
Human	GTEx	Tissue	Lung		1	Unstranded	Paired-end	2x76	30144514	GTEX-11NV4-1126-SM-5HL6J
Human	GTEx	Tissue	Lung		1	Unstranded	Paired-end	2x76	32872509	GTEX-11O72-1326-SM-5BC5A
Human	GTEx	Tissue	Lung		1	Unstranded	Paired-end	2x76	27093388	GTEX-11OF3-1126-SM-5986C
Human	GTEx	Tissue	Lung		1	Unstranded	Paired-end	2x76	33638113	GTEX-11P7K-0326-SM-59871
Human	GTEx	Tissue	Lung		1	Unstranded	Paired-end	2x76	33516894	GTEX-11P81-0226-SM-5HL5M
Human	GTEx	Tissue	Lung		1	Unstranded	Paired-end	2x76	30961777	GTEX-11PRG-0926-SM-5EGI8
Human	GTEx	Tissue	Lung		1	Unstranded	Paired-end	2x76	36554196	GTEX-11TT1-1626-SM-5EQL7
Human	GTEx	Tissue	Lung		1	Unstranded	Paired-end	2x76	29363255	GTEX-11TUW-0526-SM-5LU9A
Human	GTEx	Tissue	Lung		1	Unstranded	Paired-end	2x76	29633073	GTEX-11UD2-0726-SM-5EQ69
Human	GTEx	Tissue	Lung		1	Unstranded	Paired-end	2x76	30824847	GTEX-11WQC-0626-SM-5EQMF
Human	GTEx	Tissue	Lung		1	Unstranded	Paired-end	2x76	45268660	GTEX-11WQK-1226-SM-5GU5Z
Human	GTEx	Tissue	Lung		1	Unstranded	Paired-end	2x76	34779062	GTEX-11ZTS-1226-SM-5EQMQ
Human	GTEx	Tissue	Lung		1	Unstranded	Paired-end	2x76	38926562	GTEX-11ZTT-0626-SM-5EQLM
Human	GTEx	Tissue	Lung		1	Unstranded	Paired-end	2x76	27580119	GTEX-11ZUS-0126-SM-5EQM5
Human	GTEx	Tissue	Lung		1	Unstranded	Paired-end	2x76	36778610	GTEX-1211K-0826-SM-5FQUP
Human	GTEx	Tissue	Lung		1	Unstranded	Paired-end	2x76	31329911	GTEX-1212Z-1026-SM-5EGJ8
Human	GTEx	Tissue	Lung		1	Unstranded	Paired-end	2x76	38076745	GTEX-12584-1426-SM-5EGJ9
Human	GTEx	Tissue	Lung		1	Unstranded	Paired-end	2x76	32193830	GTEX-12696-1026-SM-5FQUV
Human	GTEx	Tissue	Lung		1	Unstranded	Paired-end	2x76	35571150	GTEX-1269C-0926-SM-5FQSR
Human	GTEx	Tissue	Lung		1	Unstranded	Paired-end	2x76	42173774	GTEX-12BJ1-1026-SM-5EGJA
Human	GTEx	Tissue	Lung		1	Unstranded	Paired-end	2x76	32741736	GTEX-12KS4-0726-SM-5FQSX
Human	GTEx	Tissue	Lung		1	Unstranded	Paired-end	2x76	27695871	GTEX-12WSA-1026-SM-5EGHN
Human	GTEx	Tissue	Lung		1	Unstranded	Paired-end	2x76	28823564	GTEX-12WSD-0826-SM-5GCNE
Human	GTEx	Tissue	Lung		1	Unstranded	Paired-end	2x76	34178659	GTEX-12WSE-0826-SM-5S2VL
Human	GTEx	Tissue	Lung		1	Unstranded	Paired-end	2x76	31698247	GTEX-12WSG-0326-SM-5FQU3
Human	GTEx	Tissue	Lung		1	Unstranded	Paired-end	2x76	25313769	GTEX-12WSH-0126-SM-5GCO3
Human	GTEx	Tissue	Lung		1	Unstranded	Paired-end	2x76	36667066	GTEX-12WSI-0826-SM-5EGKD
Human	GTEx	Tissue	Lung		1	Unstranded	Paired-end	2x76	29603062	GTEX-12WSJ-0226-SM-5GCP7
Human	GTEx	Tissue	Lung		1	Unstranded	Paired-end	2x76	33605158	GTEX-12WSK-0826-SM-5CVNP
Human	GTEx	Tissue	Lung		1	Unstranded	Paired-end	2x76	37419671	GTEX-12WSL-1026-SM-5CVNJ
Human	GTEx	Tissue	Lung		1	Unstranded	Paired-end	2x76	30725907	GTEX-12WSN-0626-SM-5BC61
Human	GTEx	Tissue	Lung		1	Unstranded	Paired-end	2x76	34318903	GTEX-12ZZW-0926-SM-5LZUD
Human	GTEx	Tissue	Lung		1	Unstranded	Paired-end	2x76	31390796	GTEX-12ZZY-0926-SM-5EQ6I
Human	GTEx	Tissue	Lung		1	Unstranded	Paired-end	2x76	28497533	GTEX-13111-0426-SM-5DUXR
Human	GTEx	Tissue	Lung		1	Unstranded	Paired-end	2x76	30631448	GTEX-13113-0426-SM-5GCOD
Human	GTEx	Tissue	Lung		1	Unstranded	Paired-end	2x76	24881042	GTEX-1313W-0926-SM-5EQ56
Human	GTEx	Tissue	Lung		1	Unstranded	Paired-end	2x76	30594380	GTEX-131XE-0726-SM-5HL9K
Human	GTEx	Tissue	Lung		1	Unstranded	Paired-end	2x76	29477739	GTEX-131XF-1026-SM-5BC6A
Human	GTEx	Tissue	Lung		1	Unstranded	Paired-end	2x76	26934979	GTEX-131XH-0426-SM-5DUWU
Human	GTEx	Tissue	Lung		1	Unstranded	Paired-end	2x76	35412822	GTEX-131XW-1126-SM-5EGK4
Human	GTEx	Tissue	Lung		1	Unstranded	Paired-end	2x76	31318267	GTEX-131YS-0926-SM-5IJB9
Human	GTEx	Tissue	Lung		1	Unstranded	Paired-end	2x76	24434251	GTEX-132NY-1226-SM-5PNVF
Human	GTEx	Tissue	Lung		1	Unstranded	Paired-end	2x76	51052485	GTEX-132QS-0726-SM-5IJE9
Human	GTEx	Tissue	Lung		1	Unstranded	Paired-end	2x76	37711339	GTEX-1339X-0626-SM-5IJER
Human	GTEx	Tissue	Lung		1	Unstranded	Paired-end	2x76	43782477	GTEX-133LE-0526-SM-5N9EJ
Human	GTEx	Tissue	Lung		1	Unstranded	Paired-end	2x76	35237770	GTEX-1399S-1726-SM-5L3DI
Human	GTEx	Tissue	Lung		1	Unstranded	Paired-end	2x76	50712399	GTEX-1399U-0826-SM-5KM1P
Human	GTEx	Tissue	Lung		1	Unstranded	Paired-end	2x76	53849949	GTEX-139T6-0426-SM-5IJEM
Human	GTEx	Tissue	Lung		1	Unstranded	Paired-end	2x76	30797710	GTEX-139TT-0726-SM-5K7XW
Human	GTEx	Tissue	Lung		1	Unstranded	Paired-end	2x76	36221816	GTEX-139UW-0226-SM-5K7WU
Human	GTEx	Tissue	Lung		1	Unstranded	Paired-end	2x76	29238565	GTEX-139YR-0926-SM-5LZYB
Human	GTEx	Tissue	Lung		1	Unstranded	Paired-end	2x76	45653173	GTEX-13CF3-0426-SM-5IJEU
Human	GTEx	Tissue	Lung		1	Unstranded	Paired-end	2x76	33215281	GTEX-13D11-0326-SM-5LZXX
Human	GTEx	Tissue	Lung		1	Unstranded	Paired-end	2x76	44201103	GTEX-13FH7-1726-SM-5IJE7
Human	GTEx	Tissue	Lung		1	Unstranded	Paired-end	2x76	31107287	GTEX-13FHO-1026-SM-5KM1Q
Human	GTEx	Tissue	Lung		1	Unstranded	Paired-end	2x76	28806120	GTEX-13FHP-0726-SM-5K7YI
Human	GTEx	Tissue	Lung		1	Unstranded	Paired-end	2x76	44951107	GTEX-13FLV-0426-SM-5KLZA
Human	GTEx	Tissue	Lung		1	Unstranded	Paired-end	2x76	33912309	GTEX-13FTX-0326-SM-5J2NG
Human	GTEx	Tissue	Lung		1	Unstranded	Paired-end	2x76	38851168	GTEX-13FTY-0126-SM-5J2NZ
Human	GTEx	Tissue	Lung		1	Unstranded	Paired-end	2x76	35381911	GTEX-13FTZ-0526-SM-5IJCW
Human	GTEx	Tissue	Lung		1	Unstranded	Paired-end	2x76	30452974	GTEX-13G51-0426-SM-5K7Z5
Human	GTEx	Tissue	Lung		1	Unstranded	Paired-end	2x76	28920664	GTEX-13JUV-0526-SM-5K7XE
Human	GTEx	Tissue	Lung		1	Unstranded	Paired-end	2x76	36750402	GTEX-13JVG-1426-SM-5MR4W
Human	GTEx	Tissue	Lung		1	Unstranded	Paired-end	2x76	29016981	GTEX-13N11-0326-SM-5LUA3
Human	GTEx	Tissue	Lung		1	Unstranded	Paired-end	2x76	34216152	GTEX-13N1W-0726-SM-5MR57
Human	GTEx	Tissue	Lung		1	Unstranded	Paired-end	2x76	46573784	GTEX-13N2G-0826-SM-5IJE6
Human	GTEx	Tissue	Lung		1	Unstranded	Paired-end	2x76	41647147	GTEX-13NYB-0626-SM-5MR47
Human	GTEx	Tissue	Lung		1	Unstranded	Paired-end	2x76	39443363	GTEX-13NYS-1626-SM-5J2MU
Human	GTEx	Tissue	Lung		1	Unstranded	Paired-end	2x76	26784797	GTEX-13NZ8-0326-SM-5L3DF
Human	GTEx	Tissue	Lung		1	Unstranded	Paired-end	2x76	31694812	GTEX-13NZ9-0926-SM-5KM12
Human	GTEx	Tissue	Lung		1	Unstranded	Paired-end	2x76	34942007	GTEX-13NZA-1426-SM-5KM4Y
Human	GTEx	Tissue	Lung		1	Unstranded	Paired-end	2x76	42558210	GTEX-13O21-3026-SM-5J2NI
Human	GTEx	Tissue	Lung		1	Unstranded	Paired-end	2x76	35388751	GTEX-13O3O-0726-SM-5J1N7
Human	GTEx	Tissue	Lung		1	Unstranded	Paired-end	2x76	48463922	GTEX-13O3P-1026-SM-5N9E7
Human	GTEx	Tissue	Lung		1	Unstranded	Paired-end	2x76	28748837	GTEX-13O3Q-0526-SM-5KM18
Human	GTEx	Tissue	Lung		1	Unstranded	Paired-end	2x76	42197091	GTEX-13O61-0726-SM-5J2MD
Human	GTEx	Tissue	Lung		1	Unstranded	Paired-end	2x76	32866148	GTEX-13OVG-0326-SM-5KM57
Human	GTEx	Tissue	Lung		1	Unstranded	Paired-end	2x76	34808760	GTEX-13OVH-1026-SM-5J2NP
Human	GTEx	Tissue	Lung		1	Unstranded	Paired-end	2x76	30822108	GTEX-13OVJ-0726-SM-5KM1W
Human	GTEx	Tissue	Lung		1	Unstranded	Paired-end	2x76	30794126	GTEX-13OVL-0626-SM-5KM13
Human	GTEx	Tissue	Lung		1	Unstranded	Paired-end	2x76	34138692	GTEX-13OW5-0726-SM-5KLZK
Human	GTEx	Tissue	Lung		1	Unstranded	Paired-end	2x76	32731912	GTEX-13OW6-0826-SM-5L3GA
Human	GTEx	Tissue	Lung		1	Unstranded	Paired-end	2x76	33532259	GTEX-13OW8-1726-SM-5L3GO
Human	GTEx	Tissue	Lung		1	Unstranded	Paired-end	2x76	35061936	GTEX-13PL7-1726-SM-5J2NX
Human	GTEx	Tissue	Lung		1	Unstranded	Paired-end	2x76	34540236	GTEX-13PVQ-0926-SM-5IJFD
Human	GTEx	Tissue	Lung		1	Unstranded	Paired-end	2x76	73175690	GTEX-13QBU-0726-SM-5J2OA
Human	GTEx	Tissue	Lung		1	Unstranded	Paired-end	2x76	29355678	GTEX-13QJ3-1026-SM-5QGQU
Human	GTEx	Tissue	Lung		1	Unstranded	Paired-end	2x76	29897233	GTEX-13QJC-0526-SM-5RQKB
Human	GTEx	Tissue	Lung		1	Unstranded	Paired-end	2x76	26418340	GTEX-13RTJ-1126-SM-5S2UJ
Human	GTEx	Tissue	Lung		1	Unstranded	Paired-end	2x76	41952187	GTEX-13S86-0626-SM-5Q5E7
Human	GTEx	Tissue	Lung		1	Unstranded	Paired-end	2x76	43506611	GTEX-13U4I-1426-SM-5J2M3
Human	GTEx	Tissue	Lung		1	Unstranded	Paired-end	2x76	36257252	GTEX-13VXT-1426-SM-5LU4B
Human	GTEx	Tissue	Lung		1	Unstranded	Paired-end	2x76	35882135	GTEX-13VXU-2726-SM-5LU4N
Human	GTEx	Tissue	Lung		1	Unstranded	Paired-end	2x76	44290841	GTEX-13YAN-1026-SM-5O9CF
Human	GTEx	Tissue	Lung		1	Unstranded	Paired-end	2x76	30684942	GTEX-144GM-0126-SM-5Q5AX
Human	GTEx	Tissue	Lung		1	Unstranded	Paired-end	2x76	30586657	GTEX-144GN-0426-SM-5O9AP
Human	GTEx	Tissue	Lung		1	Unstranded	Paired-end	2x76	27368794	GTEX-144GO-0226-SM-5LUB1
Human	GTEx	Tissue	Lung		1	Unstranded	Paired-end	2x76	38981032	GTEX-145LS-1226-SM-5Q5D9
Human	GTEx	Tissue	Lung		1	Unstranded	Paired-end	2x76	26775192	GTEX-145LT-0326-SM-5LUAD
Human	GTEx	Tissue	Lung		1	Unstranded	Paired-end	2x76	27503281	GTEX-145LU-0526-SM-5O9AT
Human	GTEx	Tissue	Lung		1	Unstranded	Paired-end	2x76	31024368	GTEX-145MF-0726-SM-5Q5BT
Human	GTEx	Tissue	Lung		1	Unstranded	Paired-end	2x76	37977799	GTEX-145MH-0626-SM-5NQAK
Human	GTEx	Tissue	Lung		1	Unstranded	Paired-end	2x76	35808958	GTEX-145MN-0926-SM-5NQBT
Human	GTEx	Tissue	Lung		1	Unstranded	Paired-end	2x76	28826974	GTEX-145MO-1326-SM-5Q5EF
Human	GTEx	Tissue	Lung		1	Unstranded	Paired-end	2x76	36656007	GTEX-146FH-1226-SM-5NQB6
Human	GTEx	Tissue	Lung		1	Unstranded	Paired-end	2x76	27665231	GTEX-146FQ-0926-SM-5LUAV
Human	GTEx	Tissue	Lung		1	Unstranded	Paired-end	2x76	27581673	GTEX-1477Z-0626-SM-5NQB7
Human	GTEx	Tissue	Lung		1	Unstranded	Paired-end	2x76	34504844	GTEX-147F3-0726-SM-5NQ9U
Human	GTEx	Tissue	Lung		1	Unstranded	Paired-end	2x76	35281312	GTEX-147F4-0926-SM-5Q5EO
Human	GTEx	Tissue	Lung		1	Unstranded	Paired-end	2x76	28653589	GTEX-147JS-1226-SM-5RQK4
Human	GTEx	Tissue	Lung		1	Unstranded	Paired-end	2x76	28494627	GTEX-148VI-0226-SM-5RQKA
Human	GTEx	Tissue	Lung		1	Unstranded	Paired-end	2x76	27874098	GTEX-148VJ-0826-SM-5LU8V
Human	GTEx	Tissue	Lung		1	Unstranded	Paired-end	2x76	35448290	GTEX-1497J-0326-SM-5Q5CN
Human	GTEx	Tissue	Lung		1	Unstranded	Paired-end	2x76	34829802	GTEX-14A6H-0526-SM-5NQAZ
Human	GTEx	Tissue	Lung		1	Unstranded	Paired-end	2x76	34765470	GTEX-14ABY-1126-SM-5Q5F8
Human	GTEx	Tissue	Lung		1	Unstranded	Paired-end	2x76	38063964	GTEX-14DAR-0226-SM-5S2PR
Human	GTEx	Tissue	Lung		1	Unstranded	Paired-end	2x76	25611406	GTEX-14E7W-1326-SM-5RQIV
Human	GTEx	Tissue	Lung		1	Unstranded	Paired-end	2x76	28691258	GTEX-N7MS-0926-SM-2HMIZ
Human	GTEx	Tissue	Lung		1	Unstranded	Paired-end	2x76	11109091	GTEX-N7MT-0126-SM-26GMB
Human	GTEx	Tissue	Lung		2	Unstranded	Paired-end	2x76	20637669	GTEX-N7MT-0126-SM-26GMS
Human	GTEx	Tissue	Lung		3	Unstranded	Paired-end	2x76	20923004	GTEX-N7MT-0126-SM-2D7VT
Human	GTEx	Tissue	Lung		1	Unstranded	Paired-end	2x76	40012201	GTEX-NFK9-1026-SM-2HMK1
Human	GTEx	Tissue	Lung		1	Unstranded	Paired-end	2x76	29172081	GTEX-NL3G-0526-SM-4RTWW
Human	GTEx	Tissue	Lung		1	Unstranded	Paired-end	2x76	7766382	GTEX-NPJ8-0326-SM-26GMG
Human	GTEx	Tissue	Lung		2	Unstranded	Paired-end	2x76	20798599	GTEX-NPJ8-0326-SM-26GMX
Human	GTEx	Tissue	Lung		3	Unstranded	Paired-end	2x76	16959263	GTEX-NPJ8-0326-SM-2D7VV
Human	GTEx	Tissue	Lung		1	Unstranded	Paired-end	2x76	41394438	GTEX-O5YT-0526-SM-32PK8
Human	GTEx	Tissue	Lung		1	Unstranded	Paired-end	2x76	7600091	GTEX-O5YV-0526-SM-26GMJ
Human	GTEx	Tissue	Lung		2	Unstranded	Paired-end	2x76	18840646	GTEX-O5YV-0526-SM-26GN1
Human	GTEx	Tissue	Lung		3	Unstranded	Paired-end	2x76	36397124	GTEX-O5YV-0526-SM-2D7VZ
Human	GTEx	Tissue	Lung		1	Unstranded	Paired-end	2x76	38040028	GTEX-O5YW-0526-SM-2YUMX
Human	GTEx	Tissue	Lung		1	Unstranded	Paired-end	2x76	25210583	GTEX-OHPJ-1026-SM-2HMLE
Human	GTEx	Tissue	Lung		1	Unstranded	Paired-end	2x76	34487289	GTEX-OHPK-0526-SM-2HMJB
Human	GTEx	Tissue	Lung		1	Unstranded	Paired-end	2x76	27982431	GTEX-OHPL-0526-SM-2HMIX
Human	GTEx	Tissue	Lung		2	Unstranded	Paired-end	2x76	48831715	GTEX-OHPL-0526-SM-3NM8U
Human	GTEx	Tissue	Lung		3	Unstranded	Paired-end	2x76	27335971	GTEX-OHPL-0526-SM-4M1XS
Human	GTEx	Tissue	Lung		1	Unstranded	Paired-end	2x76	31599578	GTEX-OHPM-0526-SM-2YUMJ
Human	GTEx	Tissue	Lung		1	Unstranded	Paired-end	2x76	24975203	GTEX-OIZG-0526-SM-2HMLF
Human	GTEx	Tissue	Lung		1	Unstranded	Paired-end	2x76	50010162	GTEX-OIZH-0526-SM-2HMKV
Human	GTEx	Tissue	Lung		1	Unstranded	Paired-end	2x76	48987712	GTEX-OIZI-1026-SM-3NB1K
Human	GTEx	Tissue	Lung		1	Unstranded	Paired-end	2x76	27610830	GTEX-OOBJ-0526-SM-48TDK
Human	GTEx	Tissue	Lung		1	Unstranded	Paired-end	2x76	40936062	GTEX-OOBK-0526-SM-2HMJJ
Human	GTEx	Tissue	Lung		1	Unstranded	Paired-end	2x76	43001314	GTEX-OXRK-0926-SM-2HMKP
Human	GTEx	Tissue	Lung		1	Unstranded	Paired-end	2x76	37793238	GTEX-OXRL-0526-SM-2I3EZ
Human	GTEx	Tissue	Lung		2	Unstranded	Paired-end	2x76	38181708	GTEX-OXRO-0326-SM-33HBM
Human	GTEx	Tissue	Lung		1	Unstranded	Paired-end	2x76	33607669	GTEX-OXRP-0526-SM-2I3EW
Human	GTEx	Tissue	Lung		1	Unstranded	Paired-end	2x76	25166382	GTEX-P44H-1126-SM-48TBU
Human	GTEx	Tissue	Lung		1	Unstranded	Paired-end	2x76	41494177	GTEX-P4PP-0526-SM-2HMKE
Human	GTEx	Tissue	Lung		1	Unstranded	Paired-end	2x76	44541890	GTEX-P4PQ-0526-SM-2HMKR
Human	GTEx	Tissue	Lung		1	Unstranded	Paired-end	2x76	38574016	GTEX-P4QS-0526-SM-2I3ET
Human	GTEx	Tissue	Lung		1	Unstranded	Paired-end	2x76	40529601	GTEX-P4QT-0526-SM-2I3EX
Human	GTEx	Tissue	Lung		1	Unstranded	Paired-end	2x76	25464370	GTEX-PLZ4-0726-SM-2TC6Q
Human	GTEx	Tissue	Lung		2	Unstranded	Paired-end	2x76	46161484	GTEX-PLZ6-0426-SM-5IFK2
Human	GTEx	Tissue	Lung		3	Unstranded	Paired-end	2x76	45635227	GTEX-PLZ6-0426-SM-5IJDW
Human	GTEx	Tissue	Lung		1	Unstranded	Paired-end	2x76	39623597	GTEX-POMQ-0526-SM-3GADD
Human	GTEx	Tissue	Lung		1	Unstranded	Paired-end	2x76	47583402	GTEX-POYW-1226-SM-2XCEP
Human	GTEx	Tissue	Lung		2	Unstranded	Paired-end	2x76	37585771	GTEX-POYW-1226-SM-5LU5O
Human	GTEx	Tissue	Lung		3	Unstranded	Paired-end	2x76	33337573	GTEX-POYW-1226-SM-5LZWQ
Human	GTEx	Tissue	Lung		1	Unstranded	Paired-end	2x76	13805907	GTEX-PSDG-1126-SM-2S1ON
Human	GTEx	Tissue	Lung		1	Unstranded	Paired-end	2x76	49976252	GTEX-PVOW-1026-SM-2XCF9
Human	GTEx	Tissue	Lung		2	Unstranded	Paired-end	2x76	30962785	GTEX-PVOW-1026-SM-5NQ7M
Human	GTEx	Tissue	Lung		3	Unstranded	Paired-end	2x76	42458079	GTEX-PVOW-1026-SM-5O9B9
Human	GTEx	Tissue	Lung		1	Unstranded	Paired-end	2x76	38888481	GTEX-PW2O-0526-SM-2I3DX
Human	GTEx	Tissue	Lung		1	Unstranded	Paired-end	2x76	34887093	GTEX-PWOO-0726-SM-2I3EB
Human	GTEx	Tissue	Lung		1	Unstranded	Paired-end	2x76	38759135	GTEX-PX3G-0526-SM-2I3EM
Human	GTEx	Tissue	Lung		1	Unstranded	Paired-end	2x76	19935196	GTEX-Q2AG-1026-SM-2HMJX
Human	GTEx	Tissue	Lung		2	Unstranded	Paired-end	2x76	72093147	GTEX-Q2AG-1026-SM-33HBW
Human	GTEx	Tissue	Lung		1	Unstranded	Paired-end	2x76	37339401	GTEX-Q2AH-0426-SM-2I3EP
Human	GTEx	Tissue	Lung		1	Unstranded	Paired-end	2x76	36030723	GTEX-Q2AI-0526-SM-2I3EJ
Human	GTEx	Tissue	Lung		1	Unstranded	Paired-end	2x76	33705318	GTEX-Q734-0626-SM-2I3EF
Human	GTEx	Tissue	Lung		1	Unstranded	Paired-end	2x76	31782300	GTEX-QCQG-0326-SM-2I3ES
Human	GTEx	Tissue	Lung		1	Unstranded	Paired-end	2x76	23931087	GTEX-QDT8-0926-SM-32PL2
Human	GTEx	Tissue	Lung		1	Unstranded	Paired-end	2x76	27311003	GTEX-QDVN-0726-SM-2I3FO
Human	GTEx	Tissue	Lung		2	Unstranded	Paired-end	2x76	40920218	GTEX-QDVN-0726-SM-4B64L
Human	GTEx	Tissue	Lung		1	Unstranded	Paired-end	2x76	32846896	GTEX-QEG4-0526-SM-48TZD
Human	GTEx	Tissue	Lung		2	Unstranded	Paired-end	2x76	64434886	GTEX-QEG5-1126-SM-33HC2
Human	GTEx	Tissue	Lung		3	Unstranded	Paired-end	2x76	33522144	GTEX-QEG5-1126-SM-5SI88
Human	GTEx	Tissue	Lung		1	Unstranded	Paired-end	2x76	18453934	GTEX-QEL4-0826-SM-3GAF2
Human	GTEx	Tissue	Lung		1	Unstranded	Paired-end	2x76	61529676	GTEX-QMR6-1926-SM-32PL9
Human	GTEx	Tissue	Lung		2	Unstranded	Paired-end	2x76	46002629	GTEX-QMRM-0826-SM-3NB33
Human	GTEx	Tissue	Lung		1	Unstranded	Paired-end	2x76	10879026	GTEX-QV44-0926-SM-2S1RH
Human	GTEx	Tissue	Lung		1	Unstranded	Paired-end	2x76	29744876	GTEX-QXCU-0626-SM-2TC69
Human	GTEx	Tissue	Lung		1	Unstranded	Paired-end	2x76	7799318	GTEX-R3RS-1026-SM-3GADF
Human	GTEx	Tissue	Lung		1	Unstranded	Paired-end	2x76	35634546	GTEX-R55C-0526-SM-3GIKA
Human	GTEx	Tissue	Lung		1	Unstranded	Paired-end	2x76	7325868	GTEX-R55D-0926-SM-3GAEU
Human	GTEx	Tissue	Lung		1	Unstranded	Paired-end	2x76	28839644	GTEX-R55G-0826-SM-2TC5U
Human	GTEx	Tissue	Lung		1	Unstranded	Paired-end	2x76	8518488	GTEX-REY6-0426-SM-2TF5G
Human	GTEx	Tissue	Lung		1	Unstranded	Paired-end	2x76	43643324	GTEX-RM2N-0426-SM-2TF4T
Human	GTEx	Tissue	Lung		1	Unstranded	Paired-end	2x76	22166943	GTEX-RN64-1226-SM-2TC6E
Human	GTEx	Tissue	Lung		1	Unstranded	Paired-end	2x76	42663960	GTEX-RNOR-0726-SM-2TF5I
Human	GTEx	Tissue	Lung		1	Unstranded	Paired-end	2x76	21239900	GTEX-RTLS-0926-SM-2TF5X
Human	GTEx	Tissue	Lung		1	Unstranded	Paired-end	2x76	21893816	GTEX-RU1J-0126-SM-2TF6Y
Human	GTEx	Tissue	Lung		1	Unstranded	Paired-end	2x76	15245610	GTEX-RU72-0526-SM-2TF5Z
Human	GTEx	Tissue	Lung		1	Unstranded	Paired-end	2x76	17757026	GTEX-RUSQ-0626-SM-2TF5V
Human	GTEx	Tissue	Lung		1	Unstranded	Paired-end	2x76	7504290	GTEX-RVPV-1726-SM-2TF5W
Human	GTEx	Tissue	Lung		2	Unstranded	Paired-end	2x76	29443280	GTEX-RVPV-1726-SM-5SI8C
Human	GTEx	Tissue	Lung		1	Unstranded	Paired-end	2x76	30877986	GTEX-RWS6-0226-SM-2XCA9
Human	GTEx	Tissue	Lung		1	Unstranded	Paired-end	2x76	23222990	GTEX-RWSA-1126-SM-2XCAZ
Human	GTEx	Tissue	Lung		1	Unstranded	Paired-end	2x76	45175792	GTEX-S32W-0326-SM-2XCBI
Human	GTEx	Tissue	Lung		1	Unstranded	Paired-end	2x76	46639776	GTEX-S33H-0626-SM-2XCBJ
Human	GTEx	Tissue	Lung		1	Unstranded	Paired-end	2x76	38231116	GTEX-S341-0326-SM-2XCAU
Human	GTEx	Tissue	Lung		1	Unstranded	Paired-end	2x76	29504268	GTEX-S4Q7-0426-SM-3K2BJ
Human	GTEx	Tissue	Lung		1	Unstranded	Paired-end	2x76	22600904	GTEX-S4Z8-0426-SM-3K2AH
Human	GTEx	Tissue	Lung		1	Unstranded	Paired-end	2x76	21781660	GTEX-S7SE-0926-SM-2XCD6
Human	GTEx	Tissue	Lung		1	Unstranded	Paired-end	2x76	25215120	GTEX-S7SF-0426-SM-3K2B7
Human	GTEx	Tissue	Lung		1	Unstranded	Paired-end	2x76	14221103	GTEX-SE5C-0526-SM-2XCE1
Human	GTEx	Tissue	Lung		1	Unstranded	Paired-end	2x76	44433370	GTEX-SIU7-0526-SM-3NM8I
Human	GTEx	Tissue	Lung		1	Unstranded	Paired-end	2x76	5781019	GTEX-SIU8-0926-SM-2XCDO
Human	GTEx	Tissue	Lung		2	Unstranded	Paired-end	2x76	33539910	GTEX-SIU8-0926-SM-5SI87
Human	GTEx	Tissue	Lung		1	Unstranded	Paired-end	2x76	24616576	GTEX-SN8G-0926-SM-4DM5I
Human	GTEx	Tissue	Lung		1	Unstranded	Paired-end	2x76	29207532	GTEX-SNOS-0426-SM-32PMH
Human	GTEx	Tissue	Lung		1	Unstranded	Paired-end	2x76	51650870	GTEX-SUCS-0626-SM-32PM5
Human	GTEx	Tissue	Lung		1	Unstranded	Paired-end	2x76	38442334	GTEX-T2IS-0526-SM-32QP9
Human	GTEx	Tissue	Lung		1	Unstranded	Paired-end	2x76	38268123	GTEX-T5JC-0826-SM-32PMC
Human	GTEx	Tissue	Lung		1	Unstranded	Paired-end	2x76	29781560	GTEX-T6MN-0826-SM-32PM4
Human	GTEx	Tissue	Lung		1	Unstranded	Paired-end	2x76	35053497	GTEX-T6MO-0426-SM-32QOI
Human	GTEx	Tissue	Lung		1	Unstranded	Paired-end	2x76	82064262	GTEX-T8EM-0326-SM-3DB7F
Human	GTEx	Tissue	Lung		1	Unstranded	Paired-end	2x76	60054737	GTEX-TMMY-0926-SM-33HBG
Human	GTEx	Tissue	Lung		2	Unstranded	Paired-end	2x76	74334751	GTEX-TMMY-0926-SM-4TT1Z
Human	GTEx	Tissue	Lung		3	Unstranded	Paired-end	2x76	47418583	GTEX-TMMY-0926-SM-4VBQZ
Human	GTEx	Tissue	Lung		4	Unstranded	Paired-end	2x76	33862721	GTEX-TMMY-0926-SM-4WKH4
Human	GTEx	Tissue	Lung		1	Unstranded	Paired-end	2x76	21015672	GTEX-TSE9-0726-SM-3DB8C
Human	GTEx	Tissue	Lung		1	Unstranded	Paired-end	2x76	55688548	GTEX-U3ZH-0526-SM-3DB75
Human	GTEx	Tissue	Lung		1	Unstranded	Paired-end	2x76	57451102	GTEX-U3ZM-0426-SM-3DB73
Human	GTEx	Tissue	Lung		2	Unstranded	Paired-end	2x76	38306984	GTEX-U3ZM-0426-SM-57WG1
Human	GTEx	Tissue	Lung		3	Unstranded	Paired-end	2x76	30703489	GTEX-U3ZM-0426-SM-59HKR
Human	GTEx	Tissue	Lung		1	Unstranded	Paired-end	2x76	84230551	GTEX-U3ZN-0626-SM-3DB7U
Human	GTEx	Tissue	Lung		1	Unstranded	Paired-end	2x76	33294076	GTEX-U412-0826-SM-3DB9K
Human	GTEx	Tissue	Lung		1	Unstranded	Paired-end	2x76	28625974	GTEX-U8T8-2226-SM-3DB95
Human	GTEx	Tissue	Lung		1	Unstranded	Paired-end	2x76	53795519	GTEX-U8XE-1426-SM-3DB8Q
Human	GTEx	Tissue	Lung		1	Unstranded	Paired-end	2x76	33497942	GTEX-UJHI-0726-SM-3DB92
Human	GTEx	Tissue	Lung		1	Unstranded	Paired-end	2x76	40924488	GTEX-UJMC-0726-SM-3GADX
Human	GTEx	Tissue	Lung		1	Unstranded	Paired-end	2x76	40375239	GTEX-UPIC-0826-SM-3GADQ
Human	GTEx	Tissue	Lung		1	Unstranded	Paired-end	2x76	42127232	GTEX-UPJH-0826-SM-4WKFD
Human	GTEx	Tissue	Lung		1	Unstranded	Paired-end	2x76	37973745	GTEX-UPK5-1126-SM-3GAEJ
Human	GTEx	Tissue	Lung		1	Unstranded	Paired-end	2x76	45186221	GTEX-V1D1-0826-SM-3P5ZA
Human	GTEx	Tissue	Lung		1	Unstranded	Paired-end	2x76	47570424	GTEX-VJYA-0326-SM-3GAEX
Human	GTEx	Tissue	Lung		1	Unstranded	Paired-end	2x76	32110293	GTEX-VUSG-0926-SM-3GIK6
Human	GTEx	Tissue	Lung		2	Unstranded	Paired-end	2x76	50988459	GTEX-VUSG-0926-SM-5S2SV
Human	GTEx	Tissue	Lung		1	Unstranded	Paired-end	2x76	29421282	GTEX-W5X1-0526-SM-3GILH
Human	GTEx	Tissue	Lung		1	Unstranded	Paired-end	2x76	28004282	GTEX-WFG7-0526-SM-3GIKI
Human	GTEx	Tissue	Lung		1	Unstranded	Paired-end	2x76	16468820	GTEX-WFG8-0926-SM-3GIKJ
Human	GTEx	Tissue	Lung		1	Unstranded	Paired-end	2x76	29334574	GTEX-WFJO-0326-SM-3GIL3
Human	GTEx	Tissue	Lung		1	Unstranded	Paired-end	2x76	40086934	GTEX-WFON-0426-SM-3GIL4
Human	GTEx	Tissue	Lung		2	Unstranded	Paired-end	2x76	56164151	GTEX-WFON-0426-SM-5S2T1
Human	GTEx	Tissue	Lung		1	Unstranded	Paired-end	2x76	50983730	GTEX-WH7G-0726-SM-3NMBM
Human	GTEx	Tissue	Lung		2	Unstranded	Paired-end	2x76	31471998	GTEX-WH7G-0726-SM-5EGIX
Human	GTEx	Tissue	Lung		3	Unstranded	Paired-end	2x76	36257726	GTEX-WH7G-0726-SM-5EQ6C
Human	GTEx	Tissue	Lung		1	Unstranded	Paired-end	2x76	42009924	GTEX-WHPG-1426-SM-3NMBB
Human	GTEx	Tissue	Lung		1	Unstranded	Paired-end	2x76	37832941	GTEX-WHSB-0326-SM-3LK6K
Human	GTEx	Tissue	Lung		2	Unstranded	Paired-end	2x76	44396672	GTEX-WHSB-0326-SM-5FQSD
Human	GTEx	Tissue	Lung		3	Unstranded	Paired-end	2x76	29573894	GTEX-WHSB-0326-SM-5GICB
Human	GTEx	Tissue	Lung		1	Unstranded	Paired-end	2x76	51658566	GTEX-WK11-0526-SM-3NB3O
Human	GTEx	Tissue	Lung		1	Unstranded	Paired-end	2x76	49486356	GTEX-WOFM-0126-SM-3MJFE
Human	GTEx	Tissue	Lung		1	Unstranded	Paired-end	2x76	50707064	GTEX-WRHU-0226-SM-3MJFV
Human	GTEx	Tissue	Lung		1	Unstranded	Paired-end	2x76	35752253	GTEX-WVJS-0826-SM-4MVNR
Human	GTEx	Tissue	Lung		1	Unstranded	Paired-end	2x76	53188864	GTEX-WWYW-0926-SM-3NB2Z
Human	GTEx	Tissue	Lung		1	Unstranded	Paired-end	2x76	50603350	GTEX-WY7C-0426-SM-3NB3C
Human	GTEx	Tissue	Lung		1	Unstranded	Paired-end	2x76	48053920	GTEX-WYBS-1126-SM-3NMAM
Human	GTEx	Tissue	Lung		1	Unstranded	Paired-end	2x76	59391827	GTEX-WYJK-0826-SM-3NM8Y
Human	GTEx	Tissue	Lung		1	Unstranded	Paired-end	2x76	54414457	GTEX-WYVS-0526-SM-3NM9W
Human	GTEx	Tissue	Lung		1	Unstranded	Paired-end	2x76	51747440	GTEX-WZTO-0426-SM-3NM99
Human	GTEx	Tissue	Lung		1	Unstranded	Paired-end	2x76	42982015	GTEX-X261-1026-SM-3NMDL
Human	GTEx	Tissue	Lung		1	Unstranded	Paired-end	2x76	40545530	GTEX-X3Y1-0626-SM-3P5YS
Human	GTEx	Tissue	Lung		1	Unstranded	Paired-end	2x76	46475703	GTEX-X4EO-0926-SM-3P5Z2
Human	GTEx	Tissue	Lung		1	Unstranded	Paired-end	2x76	42946679	GTEX-X4EP-0526-SM-3P5YW
Human	GTEx	Tissue	Lung		1	Unstranded	Paired-end	2x76	46005670	GTEX-X4LF-0526-SM-3NMB6
Human	GTEx	Tissue	Lung		1	Unstranded	Paired-end	2x76	31727187	GTEX-X4XX-1026-SM-4QARO
Human	GTEx	Tissue	Lung		1	Unstranded	Paired-end	2x76	26990883	GTEX-X4XY-1026-SM-46MVX
Human	GTEx	Tissue	Lung		1	Unstranded	Paired-end	2x76	32759259	GTEX-X585-1026-SM-46MW6
Human	GTEx	Tissue	Lung		1	Unstranded	Paired-end	2x76	31396682	GTEX-X5EB-0426-SM-46MVY
Human	GTEx	Tissue	Lung		1	Unstranded	Paired-end	2x76	29586379	GTEX-XBEC-1026-SM-4QASM
Human	GTEx	Tissue	Lung		1	Unstranded	Paired-end	2x76	27145618	GTEX-XBED-0826-SM-47JYC
Human	GTEx	Tissue	Lung		1	Unstranded	Paired-end	2x76	30754967	GTEX-XBEW-0226-SM-4AT6A
Human	GTEx	Tissue	Lung		1	Unstranded	Paired-end	2x76	31149391	GTEX-XGQ4-0826-SM-4AT4T
Human	GTEx	Tissue	Lung		1	Unstranded	Paired-end	2x76	34034421	GTEX-XMD2-1026-SM-4WWE8
Human	GTEx	Tissue	Lung		1	Unstranded	Paired-end	2x76	33384409	GTEX-XOT4-1426-SM-4B65T
Human	GTEx	Tissue	Lung		1	Unstranded	Paired-end	2x76	47735777	GTEX-XPVG-1026-SM-4B64Y
Human	GTEx	Tissue	Lung		1	Unstranded	Paired-end	2x76	27312769	GTEX-XQ3S-0926-SM-4BOPI
Human	GTEx	Tissue	Lung		1	Unstranded	Paired-end	2x76	34937566	GTEX-XQ8I-1126-SM-4BOO2
Human	GTEx	Tissue	Lung		1	Unstranded	Paired-end	2x76	24156526	GTEX-XUJ4-1426-SM-4BONT
Human	GTEx	Tissue	Lung		1	Unstranded	Paired-end	2x76	31024911	GTEX-XV7Q-0426-SM-4BRVN
Human	GTEx	Tissue	Lung		1	Unstranded	Paired-end	2x76	25993813	GTEX-XXEK-0626-SM-4BRWE
Human	GTEx	Tissue	Lung		2	Unstranded	Paired-end	2x76	53641831	GTEX-XXEK-0626-SM-5S2SZ
Human	GTEx	Tissue	Lung		1	Unstranded	Paired-end	2x76	34750584	GTEX-XYKS-0526-SM-4BRW2
Human	GTEx	Tissue	Lung		1	Unstranded	Paired-end	2x76	48166395	GTEX-Y111-1026-SM-4TT22
Human	GTEx	Tissue	Lung		1	Unstranded	Paired-end	2x76	25221370	GTEX-Y3I4-0426-SM-4TT29
Human	GTEx	Tissue	Lung		1	Unstranded	Paired-end	2x76	34072222	GTEX-Y3IK-0626-SM-4WWE4
Human	GTEx	Tissue	Lung		1	Unstranded	Paired-end	2x76	46505226	GTEX-Y5LM-0726-SM-4VBRP
Human	GTEx	Tissue	Lung		1	Unstranded	Paired-end	2x76	49537034	GTEX-Y5V5-0826-SM-4VBQD
Human	GTEx	Tissue	Lung		1	Unstranded	Paired-end	2x76	40071363	GTEX-Y5V6-0226-SM-4V6G7
Human	GTEx	Tissue	Lung		1	Unstranded	Paired-end	2x76	48010551	GTEX-Y8E4-0526-SM-4V6GC
Human	GTEx	Tissue	Lung		1	Unstranded	Paired-end	2x76	34547113	GTEX-Y8LW-0326-SM-4VBQ9
Human	GTEx	Tissue	Lung		1	Unstranded	Paired-end	2x76	54034945	GTEX-Y9LG-0526-SM-4VBRY
Human	GTEx	Tissue	Lung		1	Unstranded	Paired-end	2x76	46534499	GTEX-YB5E-0726-SM-4VDSH
Human	GTEx	Tissue	Lung		1	Unstranded	Paired-end	2x76	50977711	GTEX-YEC3-0226-SM-5IFJO
Human	GTEx	Tissue	Lung		1	Unstranded	Paired-end	2x76	70933361	GTEX-YEC4-0526-SM-4W21U
Human	GTEx	Tissue	Lung		1	Unstranded	Paired-end	2x76	47577028	GTEX-YECK-0926-SM-4W214
Human	GTEx	Tissue	Lung		1	Unstranded	Paired-end	2x76	56507324	GTEX-YF7O-0626-SM-4W21R
Human	GTEx	Tissue	Lung		1	Unstranded	Paired-end	2x76	35025203	GTEX-YFC4-1126-SM-5RQJN
Human	GTEx	Tissue	Lung		1	Unstranded	Paired-end	2x76	46029767	GTEX-YFCO-0426-SM-4W1Z7
Human	GTEx	Tissue	Lung		1	Unstranded	Paired-end	2x76	27329335	GTEX-YJ8O-1826-SM-5HL82
Human	GTEx	Tissue	Lung		1	Unstranded	Paired-end	2x76	30254929	GTEX-ZA64-0326-SM-5HL8T
Human	GTEx	Tissue	Lung		1	Unstranded	Paired-end	2x76	28702993	GTEX-ZAB4-0626-SM-5CVN3
Human	GTEx	Tissue	Lung		1	Unstranded	Paired-end	2x76	26080263	GTEX-ZAB5-0626-SM-5PNVB
Human	GTEx	Tissue	Lung		1	Unstranded	Paired-end	2x76	32273863	GTEX-ZC5H-0926-SM-5CVMZ
Human	GTEx	Tissue	Lung		1	Unstranded	Paired-end	2x76	33938613	GTEX-ZDTS-1026-SM-4WAXS
Human	GTEx	Tissue	Lung		1	Unstranded	Paired-end	2x76	39961352	GTEX-ZDTT-0926-SM-5J2MS
Human	GTEx	Tissue	Lung		1	Unstranded	Paired-end	2x76	24846529	GTEX-ZDXO-1326-SM-57WBS
Human	GTEx	Tissue	Lung		1	Unstranded	Paired-end	2x76	36412655	GTEX-ZDYS-0426-SM-5IJEQ
Human	GTEx	Tissue	Lung		1	Unstranded	Paired-end	2x76	36729702	GTEX-ZE7O-0826-SM-57WCP
Human	GTEx	Tissue	Lung		1	Unstranded	Paired-end	2x76	34239111	GTEX-ZEX8-0526-SM-4WKH5
Human	GTEx	Tissue	Lung		1	Unstranded	Paired-end	2x76	51040548	GTEX-ZF28-0726-SM-4WKFU
Human	GTEx	Tissue	Lung		1	Unstranded	Paired-end	2x76	30094797	GTEX-ZF29-1026-SM-4WKGC
Human	GTEx	Tissue	Lung		1	Unstranded	Paired-end	2x76	35209040	GTEX-ZF2S-0626-SM-4WKH2
Human	GTEx	Tissue	Lung		1	Unstranded	Paired-end	2x76	43945234	GTEX-ZG7Y-1026-SM-4WWDG
Human	GTEx	Tissue	Lung		1	Unstranded	Paired-end	2x76	37846190	GTEX-ZLV1-0426-SM-4WWC2
Human	GTEx	Tissue	Lung		1	Unstranded	Paired-end	2x76	45791137	GTEX-ZLWG-0626-SM-4WWFR
Human	GTEx	Tissue	Lung		1	Unstranded	Paired-end	2x76	38722868	GTEX-ZPIC-0626-SM-57WDY
Human	GTEx	Tissue	Lung		1	Unstranded	Paired-end	2x76	45104640	GTEX-ZPU1-0926-SM-57WDO
Human	GTEx	Tissue	Lung		1	Unstranded	Paired-end	2x76	33016185	GTEX-ZQG8-0326-SM-51MSE
Human	GTEx	Tissue	Lung		1	Unstranded	Paired-end	2x76	37986547	GTEX-ZT9W-0726-SM-4YCDC
Human	GTEx	Tissue	Lung		1	Unstranded	Paired-end	2x76	36707132	GTEX-ZT9X-0326-SM-51MTE
Human	GTEx	Tissue	Lung		1	Unstranded	Paired-end	2x76	35846926	GTEX-ZTPG-0926-SM-5O99H
Human	GTEx	Tissue	Lung		1	Unstranded	Paired-end	2x76	25802863	GTEX-ZTTD-1126-SM-51MRP
Human	GTEx	Tissue	Lung		1	Unstranded	Paired-end	2x76	31666835	GTEX-ZUA1-1026-SM-4YCEA
Human	GTEx	Tissue	Lung		1	Unstranded	Paired-end	2x76	31980395	GTEX-ZVT3-0926-SM-5GICK
Human	GTEx	Tissue	Lung		1	Unstranded	Paired-end	2x76	40956616	GTEX-ZVZQ-1526-SM-5N9G6
Human	GTEx	Tissue	Lung		1	Unstranded	Paired-end	2x76	33417357	GTEX-ZXG5-0826-SM-5GID6
Human	GTEx	Tissue	Lung		1	Unstranded	Paired-end	2x76	37733158	GTEX-ZY6K-0326-SM-5SIBB
Human	GTEx	Tissue	Lung		1	Unstranded	Paired-end	2x76	29358192	GTEX-ZYFG-0226-SM-5GIDT
Human	GTEx	Tissue	Lung		1	Unstranded	Paired-end	2x76	35618244	GTEX-ZYT6-0526-SM-5GIEA
Human	GTEx	Tissue	Lung		1	Unstranded	Paired-end	2x76	33357479	GTEX-ZYVF-1726-SM-5E443
Human	GTEx	Tissue	Lung		1	Unstranded	Paired-end	2x76	37131110	GTEX-ZYW4-1526-SM-5SIBA
Human	GTEx	Tissue	Lung		1	Unstranded	Paired-end	2x76	33197379	GTEX-ZYWO-0826-SM-5E45W
Human	GTEx	Tissue	Lung		1	Unstranded	Paired-end	2x76	33997647	GTEX-ZYY3-0926-SM-5E454
Human	GTEx	Tissue	Lung		1	Unstranded	Paired-end	2x76	38715268	GTEX-ZZPT-1326-SM-5E43H
Human	GTEx	Tissue	Lung		1	Unstranded	Paired-end	2x76	35480058	GTEX-ZZPU-0526-SM-5E44U
Human	GTEx	Tissue	Ovary		1	Unstranded	Paired-end	2x76	32071373	GTEX-1117F-2226-SM-5N9CH
Human	GTEx	Tissue	Ovary		1	Unstranded	Paired-end	2x76	32861833	GTEX-11EM3-1726-SM-5N9D1
Human	GTEx	Tissue	Ovary		1	Unstranded	Paired-end	2x76	30534752	GTEX-11EMC-1726-SM-5H11P
Human	GTEx	Tissue	Ovary		1	Unstranded	Paired-end	2x76	29640460	GTEX-11GSP-0226-SM-5A5KV
Human	GTEx	Tissue	Ovary		1	Unstranded	Paired-end	2x76	31035749	GTEX-11I78-1926-SM-59878
Human	GTEx	Tissue	Ovary		1	Unstranded	Paired-end	2x76	59538677	GTEX-11P81-1526-SM-5P9GS
Human	GTEx	Tissue	Ovary		1	Unstranded	Paired-end	2x76	37014252	GTEX-11VI4-1026-SM-5EQM1
Human	GTEx	Tissue	Ovary		1	Unstranded	Paired-end	2x76	32826915	GTEX-11XUK-1626-SM-5GU5O
Human	GTEx	Tissue	Ovary		1	Unstranded	Paired-end	2x76	30312856	GTEX-11ZTS-1926-SM-5CVLA
Human	GTEx	Tissue	Ovary		1	Unstranded	Paired-end	2x76	31918920	GTEX-11ZVC-1426-SM-5EGGA
Human	GTEx	Tissue	Ovary		1	Unstranded	Paired-end	2x76	50381493	GTEX-1269C-1826-SM-5N9E1
Human	GTEx	Tissue	Ovary		1	Unstranded	Paired-end	2x76	27405194	GTEX-12WSB-2226-SM-5GCOS
Human	GTEx	Tissue	Ovary		1	Unstranded	Paired-end	2x76	32748935	GTEX-12WSD-2726-SM-59HLR
Human	GTEx	Tissue	Ovary		1	Unstranded	Paired-end	2x76	36025079	GTEX-12WSG-1426-SM-5FQUK
Human	GTEx	Tissue	Ovary		1	Unstranded	Paired-end	2x76	31736162	GTEX-12WSJ-1226-SM-5LU91
Human	GTEx	Tissue	Ovary		1	Unstranded	Paired-end	2x76	30711321	GTEX-12WSK-1926-SM-5LZVK
Human	GTEx	Tissue	Ovary		1	Unstranded	Paired-end	2x76	31493557	GTEX-12ZZX-2026-SM-5LZV9
Human	GTEx	Tissue	Ovary		1	Unstranded	Paired-end	2x76	38339103	GTEX-1313W-2726-SM-5P9IX
Human	GTEx	Tissue	Ovary		1	Unstranded	Paired-end	2x76	44416051	GTEX-131YS-2226-SM-5P9G8
Human	GTEx	Tissue	Ovary		1	Unstranded	Paired-end	2x76	30359307	GTEX-132AR-1426-SM-5IFF1
Human	GTEx	Tissue	Ovary		1	Unstranded	Paired-end	2x76	30568385	GTEX-133LE-1226-SM-5IFGC
Human	GTEx	Tissue	Ovary		1	Unstranded	Paired-end	2x76	40720774	GTEX-1399S-2126-SM-5J2MH
Human	GTEx	Tissue	Ovary		1	Unstranded	Paired-end	2x76	45140698	GTEX-1399U-1726-SM-5P9J4
Human	GTEx	Tissue	Ovary		1	Unstranded	Paired-end	2x76	27353240	GTEX-139D8-2426-SM-5KM3A
Human	GTEx	Tissue	Ovary		1	Unstranded	Paired-end	2x76	47896187	GTEX-13D11-1126-SM-5KLYS
Human	GTEx	Tissue	Ovary		1	Unstranded	Paired-end	2x76	38127828	GTEX-13FTX-0926-SM-5IFF7
Human	GTEx	Tissue	Ovary		1	Unstranded	Paired-end	2x76	37545110	GTEX-13N11-0526-SM-5IJFI
Human	GTEx	Tissue	Ovary		1	Unstranded	Paired-end	2x76	44577509	GTEX-13O3O-2726-SM-5KM35
Human	GTEx	Tissue	Ovary		1	Unstranded	Paired-end	2x76	28233381	GTEX-13OVI-0726-SM-5L3DD
Human	GTEx	Tissue	Ovary		1	Unstranded	Paired-end	2x76	34959471	GTEX-13OVJ-2426-SM-5KM3I
Human	GTEx	Tissue	Ovary		1	Unstranded	Paired-end	2x76	41199793	GTEX-13PL7-2326-SM-5L3FY
Human	GTEx	Tissue	Ovary		1	Unstranded	Paired-end	2x76	24324309	GTEX-13PVR-1226-SM-5RQJ2
Human	GTEx	Tissue	Ovary		1	Unstranded	Paired-end	2x76	35466191	GTEX-13QBU-1526-SM-5LU3W
Human	GTEx	Tissue	Ovary		1	Unstranded	Paired-end	2x76	39590701	GTEX-13QIC-1526-SM-5IJFL
Human	GTEx	Tissue	Ovary		1	Unstranded	Paired-end	2x76	27493681	GTEX-13U4I-2126-SM-5LU55
Human	GTEx	Tissue	Ovary		1	Unstranded	Paired-end	2x76	44417074	GTEX-13VXT-1526-SM-5LU3J
Human	GTEx	Tissue	Ovary		1	Unstranded	Paired-end	2x76	36328813	GTEX-13W3W-1526-SM-5LU5I
Human	GTEx	Tissue	Ovary		1	Unstranded	Paired-end	2x76	32744616	GTEX-13X6H-1026-SM-5SIBE
Human	GTEx	Tissue	Ovary		1	Unstranded	Paired-end	2x76	41999343	GTEX-145ME-1226-SM-5SIB6
Human	GTEx	Tissue	Ovary		1	Unstranded	Paired-end	2x76	29650363	GTEX-146FH-2526-SM-5Q5BP
Human	GTEx	Tissue	Ovary		1	Unstranded	Paired-end	2x76	24994965	GTEX-14AS3-1326-SM-5RQJE
Human	GTEx	Tissue	Ovary		1	Unstranded	Paired-end	2x76	44804948	GTEX-OHPK-2426-SM-3MJGH
Human	GTEx	Tissue	Ovary		1	Unstranded	Paired-end	2x76	26821666	GTEX-OHPL-2426-SM-48TDN
Human	GTEx	Tissue	Ovary		1	Unstranded	Paired-end	2x76	52733636	GTEX-P4PP-2426-SM-3P61L
Human	GTEx	Tissue	Ovary		1	Unstranded	Paired-end	2x76	50595615	GTEX-P4QT-2426-SM-3NMCL
Human	GTEx	Tissue	Ovary		1	Unstranded	Paired-end	2x76	47075593	GTEX-P78B-1926-SM-3P616
Human	GTEx	Tissue	Ovary		1	Unstranded	Paired-end	2x76	43290078	GTEX-PLZ4-2826-SM-3P617
Human	GTEx	Tissue	Ovary		1	Unstranded	Paired-end	2x76	38818159	GTEX-POMQ-1426-SM-3P61D
Human	GTEx	Tissue	Ovary		1	Unstranded	Paired-end	2x76	27974957	GTEX-PWCY-1326-SM-48TCU
Human	GTEx	Tissue	Ovary		1	Unstranded	Paired-end	2x76	34707596	GTEX-PWN1-2426-SM-48TDD
Human	GTEx	Tissue	Ovary		1	Unstranded	Paired-end	2x76	34612232	GTEX-PWOO-1726-SM-48TDC
Human	GTEx	Tissue	Ovary		1	Unstranded	Paired-end	2x76	31276943	GTEX-PX3G-2426-SM-48TZZ
Human	GTEx	Tissue	Ovary		1	Unstranded	Paired-end	2x76	32666940	GTEX-Q734-0726-SM-48TZP
Human	GTEx	Tissue	Ovary		1	Unstranded	Paired-end	2x76	27640708	GTEX-QCQG-1426-SM-48U22
Human	GTEx	Tissue	Ovary		1	Unstranded	Paired-end	2x76	25054656	GTEX-QVJO-3126-SM-4R1KC
Human	GTEx	Tissue	Ovary		1	Unstranded	Paired-end	2x76	32158584	GTEX-R55G-1526-SM-48FER
Human	GTEx	Tissue	Ovary		1	Unstranded	Paired-end	2x76	30105595	GTEX-RTLS-2326-SM-46MUH
Human	GTEx	Tissue	Ovary		1	Unstranded	Paired-end	2x76	30517505	GTEX-RU1J-0826-SM-46MUU
Human	GTEx	Tissue	Ovary		1	Unstranded	Paired-end	2x76	32088975	GTEX-RU72-2226-SM-46MUE
Human	GTEx	Tissue	Ovary		1	Unstranded	Paired-end	2x76	31161434	GTEX-RWS6-1026-SM-47JXD
Human	GTEx	Tissue	Ovary		1	Unstranded	Paired-end	2x76	31851307	GTEX-S32W-1226-SM-4AD67
Human	GTEx	Tissue	Ovary		1	Unstranded	Paired-end	2x76	35001881	GTEX-S341-0726-SM-4AD5R
Human	GTEx	Tissue	Ovary		1	Unstranded	Paired-end	2x76	39626381	GTEX-S4P3-0926-SM-4AD54
Human	GTEx	Tissue	Ovary		1	Unstranded	Paired-end	2x76	32548908	GTEX-S4UY-1026-SM-4AD53
Human	GTEx	Tissue	Ovary		1	Unstranded	Paired-end	2x76	35604986	GTEX-S7SF-1326-SM-4AD4P
Human	GTEx	Tissue	Ovary		1	Unstranded	Paired-end	2x76	23266886	GTEX-T2IS-2026-SM-4DM6W
Human	GTEx	Tissue	Ovary		1	Unstranded	Paired-end	2x76	34079015	GTEX-T5JW-0426-SM-4DM7M
Human	GTEx	Tissue	Ovary		1	Unstranded	Paired-end	2x76	26775696	GTEX-T6MO-1126-SM-4DM5D
Human	GTEx	Tissue	Ovary		1	Unstranded	Paired-end	2x76	31867080	GTEX-TML8-0926-SM-4DXSJ
Human	GTEx	Tissue	Ovary		1	Unstranded	Paired-end	2x76	29934231	GTEX-TMMY-1726-SM-4DXTD
Human	GTEx	Tissue	Ovary		1	Unstranded	Paired-end	2x76	31815539	GTEX-TSE9-2226-SM-4DXUR
Human	GTEx	Tissue	Ovary		1	Unstranded	Paired-end	2x76	31148650	GTEX-U3ZN-1026-SM-4DXTC
Human	GTEx	Tissue	Ovary		1	Unstranded	Paired-end	2x76	29369270	GTEX-UJHI-1226-SM-4IHLR
Human	GTEx	Tissue	Ovary		1	Unstranded	Paired-end	2x76	25390723	GTEX-W5WG-0926-SM-4RTX9
Human	GTEx	Tissue	Ovary		1	Unstranded	Paired-end	2x76	29368421	GTEX-WEY5-0626-SM-4LMIA
Human	GTEx	Tissue	Ovary		1	Unstranded	Paired-end	2x76	44186959	GTEX-WI4N-2526-SM-4OOSE
Human	GTEx	Tissue	Ovary		1	Unstranded	Paired-end	2x76	52039856	GTEX-WWYW-2726-SM-4MVOP
Human	GTEx	Tissue	Ovary		1	Unstranded	Paired-end	2x76	59743822	GTEX-WXYG-1426-SM-4ONCK
Human	GTEx	Tissue	Ovary		1	Unstranded	Paired-end	2x76	36521405	GTEX-WYBS-2426-SM-4ONDI
Human	GTEx	Tissue	Ovary		1	Unstranded	Paired-end	2x76	32361836	GTEX-WYVS-1526-SM-4OND4
Human	GTEx	Tissue	Ovary		1	Unstranded	Paired-end	2x76	26861207	GTEX-X15G-1726-SM-4PQZN
Human	GTEx	Tissue	Ovary		1	Unstranded	Paired-end	2x76	24368724	GTEX-X4EO-2426-SM-4QASD
Human	GTEx	Tissue	Ovary		1	Unstranded	Paired-end	2x76	26664275	GTEX-X8HC-2726-SM-46MUA
Human	GTEx	Tissue	Ovary		1	Unstranded	Paired-end	2x76	31121451	GTEX-XMD3-2326-SM-4AT5H
Human	GTEx	Tissue	Ovary		1	Unstranded	Paired-end	2x76	23481234	GTEX-XUJ4-1326-SM-4BOQ9
Human	GTEx	Tissue	Ovary		1	Unstranded	Paired-end	2x76	36377302	GTEX-XUW1-0126-SM-4BOOQ
Human	GTEx	Tissue	Ovary		1	Unstranded	Paired-end	2x76	25685742	GTEX-XUZC-1026-SM-4BOPY
Human	GTEx	Tissue	Ovary		1	Unstranded	Paired-end	2x76	38214829	GTEX-XV7Q-1426-SM-4BRWA
Human	GTEx	Tissue	Ovary		1	Unstranded	Paired-end	2x76	38388397	GTEX-XYKS-1726-SM-4E3IO
Human	GTEx	Tissue	Ovary		1	Unstranded	Paired-end	2x76	48378642	GTEX-Y114-1726-SM-4TT7U
Human	GTEx	Tissue	Ovary		1	Unstranded	Paired-end	2x76	37962931	GTEX-Y3IK-2026-SM-4YCDG
Human	GTEx	Tissue	Ovary		1	Unstranded	Paired-end	2x76	35400575	GTEX-YB5K-1426-SM-5IFIB
Human	GTEx	Tissue	Ovary		1	Unstranded	Paired-end	2x76	34112028	GTEX-YFC4-2726-SM-5IFJW
Human	GTEx	Tissue	Ovary		1	Unstranded	Paired-end	2x76	36559897	GTEX-YJ8O-1026-SM-5CVM5
Human	GTEx	Tissue	Ovary		1	Unstranded	Paired-end	2x76	25812525	GTEX-ZAJG-2726-SM-5S2MU
Human	GTEx	Tissue	Ovary		1	Unstranded	Paired-end	2x76	30322192	GTEX-ZC5H-2026-SM-5CVN2
Human	GTEx	Tissue	Ovary		1	Unstranded	Paired-end	2x76	33440963	GTEX-ZLWG-0926-SM-4WWC3
Human	GTEx	Tissue	Ovary		1	Unstranded	Paired-end	2x76	36832284	GTEX-ZP4G-0626-SM-4WWF1
Human	GTEx	Tissue	Ovary		1	Unstranded	Paired-end	2x76	38528685	GTEX-ZPIC-1426-SM-4WWCP
Human	GTEx	Tissue	Ovary		1	Unstranded	Paired-end	2x76	26869909	GTEX-ZV6S-1426-SM-59HKX
Human	GTEx	Tissue	Ovary		1	Unstranded	Paired-end	2x76	38165125	GTEX-ZVT2-0326-SM-5E44G
Human	GTEx	Tissue	Ovary		1	Unstranded	Paired-end	2x76	27596129	GTEX-ZVT3-2626-SM-5GU5L
Human	GTEx	Tissue	Ovary		1	Unstranded	Paired-end	2x76	32130371	GTEX-ZYFG-1726-SM-5GZZB
Human	GTEx	Tissue	Ovary		1	Unstranded	Paired-end	2x76	29494611	GTEX-ZYWO-1926-SM-5E456
Human	GTEx	Tissue	Ovary		1	Unstranded	Paired-end	2x76	27946806	GTEX-ZYY3-2726-SM-5EGH4
Human	GTEx	Tissue	Ovary		1	Unstranded	Paired-end	2x76	27134313	GTEX-ZZPU-2126-SM-5EGIU
Human	GTEx	Tissue	Pancreas		1	Unstranded	Paired-end	2x76	22578445	GTEX-111CU-0526-SM-5EGHK
Human	GTEx	Tissue	Pancreas		1	Unstranded	Paired-end	2x76	27559961	GTEX-111YS-1226-SM-5EGGJ
Human	GTEx	Tissue	Pancreas		1	Unstranded	Paired-end	2x76	38803461	GTEX-1122O-0726-SM-5GIEV
Human	GTEx	Tissue	Pancreas		1	Unstranded	Paired-end	2x76	34370203	GTEX-1128S-0826-SM-5GZZI
Human	GTEx	Tissue	Pancreas		1	Unstranded	Paired-end	2x76	27062251	GTEX-117YX-0226-SM-5EGH6
Human	GTEx	Tissue	Pancreas		1	Unstranded	Paired-end	2x76	33728223	GTEX-11DXX-0926-SM-5H112
Human	GTEx	Tissue	Pancreas		1	Unstranded	Paired-end	2x76	35768606	GTEX-11EQ9-1026-SM-5H134
Human	GTEx	Tissue	Pancreas		1	Unstranded	Paired-end	2x76	30338257	GTEX-11GSP-0426-SM-5A5KX
Human	GTEx	Tissue	Pancreas		1	Unstranded	Paired-end	2x76	27528975	GTEX-11I78-0626-SM-5A5LZ
Human	GTEx	Tissue	Pancreas		1	Unstranded	Paired-end	2x76	29513045	GTEX-11ILO-1526-SM-5A5KZ
Human	GTEx	Tissue	Pancreas		1	Unstranded	Paired-end	2x76	29911746	GTEX-11LCK-0226-SM-5A5M6
Human	GTEx	Tissue	Pancreas		1	Unstranded	Paired-end	2x76	26184844	GTEX-11ONC-0526-SM-5BC57
Human	GTEx	Tissue	Pancreas		1	Unstranded	Paired-end	2x76	28999969	GTEX-11P7K-0526-SM-5BC5I
Human	GTEx	Tissue	Pancreas		1	Unstranded	Paired-end	2x76	23779328	GTEX-11TT1-0326-SM-5LUAY
Human	GTEx	Tissue	Pancreas		1	Unstranded	Paired-end	2x76	23641872	GTEX-11VI4-0426-SM-5EGHZ
Human	GTEx	Tissue	Pancreas		1	Unstranded	Paired-end	2x76	42488737	GTEX-11XUK-0626-SM-5N9ES
Human	GTEx	Tissue	Pancreas		1	Unstranded	Paired-end	2x76	23492175	GTEX-1211K-1126-SM-5EGGB
Human	GTEx	Tissue	Pancreas		1	Unstranded	Paired-end	2x76	27262441	GTEX-12BJ1-1126-SM-5EGGG
Human	GTEx	Tissue	Pancreas		1	Unstranded	Paired-end	2x76	24332086	GTEX-12WSD-1626-SM-5GCNR
Human	GTEx	Tissue	Pancreas		1	Unstranded	Paired-end	2x76	31275896	GTEX-12WSG-1026-SM-5EGII
Human	GTEx	Tissue	Pancreas		1	Unstranded	Paired-end	2x76	27900153	GTEX-12WSK-0226-SM-5BC62
Human	GTEx	Tissue	Pancreas		1	Unstranded	Paired-end	2x76	33238776	GTEX-12WSL-0426-SM-5GCNX
Human	GTEx	Tissue	Pancreas		1	Unstranded	Paired-end	2x76	31512492	GTEX-12WSN-0826-SM-5GCOF
Human	GTEx	Tissue	Pancreas		1	Unstranded	Paired-end	2x76	37488387	GTEX-131XE-1926-SM-5IFER
Human	GTEx	Tissue	Pancreas		1	Unstranded	Paired-end	2x76	26372513	GTEX-131XF-1426-SM-5BC68
Human	GTEx	Tissue	Pancreas		1	Unstranded	Paired-end	2x76	33008794	GTEX-131XG-1426-SM-5GCMO
Human	GTEx	Tissue	Pancreas		1	Unstranded	Paired-end	2x76	31209457	GTEX-132AR-1826-SM-5EGHR
Human	GTEx	Tissue	Pancreas		1	Unstranded	Paired-end	2x76	46537862	GTEX-132QS-0926-SM-5P9GB
Human	GTEx	Tissue	Pancreas		1	Unstranded	Paired-end	2x76	30489691	GTEX-1339X-1026-SM-5IFH5
Human	GTEx	Tissue	Pancreas		1	Unstranded	Paired-end	2x76	44494708	GTEX-1399R-0426-SM-5IJE3
Human	GTEx	Tissue	Pancreas		1	Unstranded	Paired-end	2x76	30135769	GTEX-1399S-0326-SM-5IFFS
Human	GTEx	Tissue	Pancreas		1	Unstranded	Paired-end	2x76	29864264	GTEX-1399U-0926-SM-5IFHA
Human	GTEx	Tissue	Pancreas		1	Unstranded	Paired-end	2x76	35212623	GTEX-139YR-1526-SM-5IFJ1
Human	GTEx	Tissue	Pancreas		1	Unstranded	Paired-end	2x76	33539584	GTEX-13CF3-1026-SM-5LZWY
Human	GTEx	Tissue	Pancreas		1	Unstranded	Paired-end	2x76	34702241	GTEX-13D11-2226-SM-5IFEO
Human	GTEx	Tissue	Pancreas		1	Unstranded	Paired-end	2x76	35897420	GTEX-13FH7-1426-SM-5IFIC
Human	GTEx	Tissue	Pancreas		1	Unstranded	Paired-end	2x76	35331594	GTEX-13FTW-0526-SM-5IFIP
Human	GTEx	Tissue	Pancreas		1	Unstranded	Paired-end	2x76	28610601	GTEX-13FTX-1226-SM-5IFGN
Human	GTEx	Tissue	Pancreas		1	Unstranded	Paired-end	2x76	23918481	GTEX-13N11-0226-SM-5KM3C
Human	GTEx	Tissue	Pancreas		1	Unstranded	Paired-end	2x76	39344277	GTEX-13NZA-1726-SM-5J1NA
Human	GTEx	Tissue	Pancreas		1	Unstranded	Paired-end	2x76	33086522	GTEX-13O1R-1826-SM-5KM3B
Human	GTEx	Tissue	Pancreas		1	Unstranded	Paired-end	2x76	36583734	GTEX-13O61-2126-SM-5IJEO
Human	GTEx	Tissue	Pancreas		1	Unstranded	Paired-end	2x76	27374065	GTEX-13OVI-0526-SM-5IFFQ
Human	GTEx	Tissue	Pancreas		1	Unstranded	Paired-end	2x76	29423300	GTEX-13PL7-2226-SM-5L3IC
Human	GTEx	Tissue	Pancreas		1	Unstranded	Paired-end	2x76	24418373	GTEX-13SLX-1326-SM-5S2QS
Human	GTEx	Tissue	Pancreas		1	Unstranded	Paired-end	2x76	31547698	GTEX-13U4I-1526-SM-5IFFF
Human	GTEx	Tissue	Pancreas		1	Unstranded	Paired-end	2x76	35882791	GTEX-13VXT-1226-SM-5LU3M
Human	GTEx	Tissue	Pancreas		1	Unstranded	Paired-end	2x76	24925846	GTEX-13W3W-1026-SM-5IFG4
Human	GTEx	Tissue	Pancreas		1	Unstranded	Paired-end	2x76	32325426	GTEX-13X6H-0626-SM-5LU53
Human	GTEx	Tissue	Pancreas		1	Unstranded	Paired-end	2x76	31360335	GTEX-13YAN-2126-SM-5Q5C4
Human	GTEx	Tissue	Pancreas		1	Unstranded	Paired-end	2x76	30551933	GTEX-144FL-1526-SM-5Q5CA
Human	GTEx	Tissue	Pancreas		1	Unstranded	Paired-end	2x76	29297746	GTEX-144GN-0826-SM-5LU5G
Human	GTEx	Tissue	Pancreas		1	Unstranded	Paired-end	2x76	22102094	GTEX-145ME-0326-SM-5S2QO
Human	GTEx	Tissue	Pancreas		1	Unstranded	Paired-end	2x76	30750952	GTEX-145MN-1426-SM-5SI9H
Human	GTEx	Tissue	Pancreas		1	Unstranded	Paired-end	2x76	33181148	GTEX-145MO-2126-SM-5Q5CZ
Human	GTEx	Tissue	Pancreas		1	Unstranded	Paired-end	2x76	26152721	GTEX-146FH-1826-SM-5QGQ7
Human	GTEx	Tissue	Pancreas		1	Unstranded	Paired-end	2x76	32174513	GTEX-146FQ-1526-SM-5Q5CX
Human	GTEx	Tissue	Pancreas		1	Unstranded	Paired-end	2x76	31022612	GTEX-146FR-0126-SM-5Q5F3
Human	GTEx	Tissue	Pancreas		1	Unstranded	Paired-end	2x76	37328573	GTEX-1497J-0426-SM-5Q5CO
Human	GTEx	Tissue	Pancreas		1	Unstranded	Paired-end	2x76	32308226	GTEX-14AS3-0326-SM-5Q5DB
Human	GTEx	Tissue	Pancreas		1	Unstranded	Paired-end	2x76	26511200	GTEX-14E6E-1426-SM-5RQI2
Human	GTEx	Tissue	Pancreas		1	Unstranded	Paired-end	2x76	25339768	GTEX-14ICL-1126-SM-5S2RE
Human	GTEx	Tissue	Pancreas		1	Unstranded	Paired-end	2x76	36802611	GTEX-N7MT-1626-SM-3LK71
Human	GTEx	Tissue	Pancreas		1	Unstranded	Paired-end	2x76	34584988	GTEX-NFK9-1626-SM-3LK5J
Human	GTEx	Tissue	Pancreas		1	Unstranded	Paired-end	2x76	43523653	GTEX-NPJ8-2126-SM-3MJGK
Human	GTEx	Tissue	Pancreas		1	Unstranded	Paired-end	2x76	41684725	GTEX-O5YT-1026-SM-3MJGF
Human	GTEx	Tissue	Pancreas		1	Unstranded	Paired-end	2x76	37872385	GTEX-OHPL-1026-SM-3MJGI
Human	GTEx	Tissue	Pancreas		1	Unstranded	Paired-end	2x76	40422794	GTEX-OHPM-1026-SM-3LK74
Human	GTEx	Tissue	Pancreas		1	Unstranded	Paired-end	2x76	42378549	GTEX-OOBJ-1026-SM-3NB2L
Human	GTEx	Tissue	Pancreas		1	Unstranded	Paired-end	2x76	26982453	GTEX-OOBK-1026-SM-48TC2
Human	GTEx	Tissue	Pancreas		1	Unstranded	Paired-end	2x76	39195818	GTEX-P4PP-1026-SM-3NM9O
Human	GTEx	Tissue	Pancreas		1	Unstranded	Paired-end	2x76	43543986	GTEX-P4PQ-1026-SM-3NMCN
Human	GTEx	Tissue	Pancreas		1	Unstranded	Paired-end	2x76	40831334	GTEX-P4QS-1026-SM-3NMCW
Human	GTEx	Tissue	Pancreas		1	Unstranded	Paired-end	2x76	44243340	GTEX-PLZ6-0726-SM-3P619
Human	GTEx	Tissue	Pancreas		1	Unstranded	Paired-end	2x76	24878724	GTEX-PSDG-1526-SM-48TCY
Human	GTEx	Tissue	Pancreas		1	Unstranded	Paired-end	2x76	23346285	GTEX-PW2O-0826-SM-48TC5
Human	GTEx	Tissue	Pancreas		1	Unstranded	Paired-end	2x76	34160085	GTEX-PWOO-0626-SM-48TZH
Human	GTEx	Tissue	Pancreas		1	Unstranded	Paired-end	2x76	28538669	GTEX-PX3G-1026-SM-48TZW
Human	GTEx	Tissue	Pancreas		1	Unstranded	Paired-end	2x76	29961899	GTEX-Q2AH-0926-SM-48TZK
Human	GTEx	Tissue	Pancreas		1	Unstranded	Paired-end	2x76	25388424	GTEX-Q2AI-0426-SM-48U13
Human	GTEx	Tissue	Pancreas		1	Unstranded	Paired-end	2x76	29634981	GTEX-Q734-0426-SM-48TZX
Human	GTEx	Tissue	Pancreas		1	Unstranded	Paired-end	2x76	27698873	GTEX-QCQG-0426-SM-48U29
Human	GTEx	Tissue	Pancreas		1	Unstranded	Paired-end	2x76	30936788	GTEX-QDVJ-1226-SM-48U1V
Human	GTEx	Tissue	Pancreas		1	Unstranded	Paired-end	2x76	23708763	GTEX-QEL4-1326-SM-447AD
Human	GTEx	Tissue	Pancreas		1	Unstranded	Paired-end	2x76	25003561	GTEX-QESD-0226-SM-447BH
Human	GTEx	Tissue	Pancreas		1	Unstranded	Paired-end	2x76	23463114	GTEX-QLQ7-0626-SM-4R1JT
Human	GTEx	Tissue	Pancreas		1	Unstranded	Paired-end	2x76	25346046	GTEX-QLQW-0326-SM-447A8
Human	GTEx	Tissue	Pancreas		1	Unstranded	Paired-end	2x76	24013784	GTEX-QMRM-0326-SM-4R1K5
Human	GTEx	Tissue	Pancreas		1	Unstranded	Paired-end	2x76	24734247	GTEX-QV31-0226-SM-447BO
Human	GTEx	Tissue	Pancreas		1	Unstranded	Paired-end	2x76	22871142	GTEX-QV44-0426-SM-4R1KF
Human	GTEx	Tissue	Pancreas		1	Unstranded	Paired-end	2x76	31181129	GTEX-R53T-0426-SM-48FEM
Human	GTEx	Tissue	Pancreas		1	Unstranded	Paired-end	2x76	28923235	GTEX-R55D-1426-SM-48FEN
Human	GTEx	Tissue	Pancreas		1	Unstranded	Paired-end	2x76	26713290	GTEX-R55G-0326-SM-48FDM
Human	GTEx	Tissue	Pancreas		1	Unstranded	Paired-end	2x76	24812029	GTEX-RM2N-0326-SM-48FD8
Human	GTEx	Tissue	Pancreas		1	Unstranded	Paired-end	2x76	28560034	GTEX-RWS6-1126-SM-47JXC
Human	GTEx	Tissue	Pancreas		1	Unstranded	Paired-end	2x76	31771064	GTEX-S32W-0826-SM-4AD5Z
Human	GTEx	Tissue	Pancreas		1	Unstranded	Paired-end	2x76	55572521	GTEX-S32W-0826-SM-5S2SI
Human	GTEx	Tissue	Pancreas		1	Unstranded	Paired-end	2x76	24876195	GTEX-S33H-1226-SM-4AD69
Human	GTEx	Tissue	Pancreas		1	Unstranded	Paired-end	2x76	38321568	GTEX-S3XE-0526-SM-4AD4G
Human	GTEx	Tissue	Pancreas		1	Unstranded	Paired-end	2x76	33605198	GTEX-S4P3-0626-SM-4AD59
Human	GTEx	Tissue	Pancreas		1	Unstranded	Paired-end	2x76	28500536	GTEX-S95S-0726-SM-4B64H
Human	GTEx	Tissue	Pancreas		1	Unstranded	Paired-end	2x76	26958612	GTEX-SE5C-0326-SM-4BRWX
Human	GTEx	Tissue	Pancreas		1	Unstranded	Paired-end	2x76	31454586	GTEX-SIU7-0926-SM-4BRX1
Human	GTEx	Tissue	Pancreas		1	Unstranded	Paired-end	2x76	30078527	GTEX-SNOS-0926-SM-4DM7A
Human	GTEx	Tissue	Pancreas		1	Unstranded	Paired-end	2x76	25563533	GTEX-SUCS-1426-SM-4DM5W
Human	GTEx	Tissue	Pancreas		1	Unstranded	Paired-end	2x76	24353491	GTEX-T5JW-0226-SM-4DM7I
Human	GTEx	Tissue	Pancreas		1	Unstranded	Paired-end	2x76	23067374	GTEX-T8EM-0826-SM-4DM76
Human	GTEx	Tissue	Pancreas		1	Unstranded	Paired-end	2x76	22126277	GTEX-TKQ2-0426-SM-4DXUO
Human	GTEx	Tissue	Pancreas		1	Unstranded	Paired-end	2x76	36218116	GTEX-TML8-0526-SM-32QOQ
Human	GTEx	Tissue	Pancreas		1	Unstranded	Paired-end	2x76	28050447	GTEX-TMMY-1326-SM-4DXU9
Human	GTEx	Tissue	Pancreas		1	Unstranded	Paired-end	2x76	24766350	GTEX-U4B1-0726-SM-4DXUA
Human	GTEx	Tissue	Pancreas		1	Unstranded	Paired-end	2x76	36063856	GTEX-U8XE-2026-SM-3DB8S
Human	GTEx	Tissue	Pancreas		1	Unstranded	Paired-end	2x76	41758172	GTEX-UJHI-0626-SM-3DB8T
Human	GTEx	Tissue	Pancreas		1	Unstranded	Paired-end	2x76	13960963	GTEX-UJMC-1126-SM-3GADP
Human	GTEx	Tissue	Pancreas		1	Unstranded	Paired-end	2x76	66613420	GTEX-UPIC-0726-SM-3GADW
Human	GTEx	Tissue	Pancreas		1	Unstranded	Paired-end	2x76	38317510	GTEX-V1D1-0726-SM-4JBH7
Human	GTEx	Tissue	Pancreas		1	Unstranded	Paired-end	2x76	28560202	GTEX-V955-0326-SM-4JBGV
Human	GTEx	Tissue	Pancreas		1	Unstranded	Paired-end	2x76	30362899	GTEX-VJYA-0826-SM-4KL1M
Human	GTEx	Tissue	Pancreas		1	Unstranded	Paired-end	2x76	19227387	GTEX-VUSG-0326-SM-3GIJ7
Human	GTEx	Tissue	Pancreas		1	Unstranded	Paired-end	2x76	48685256	GTEX-VUSG-0326-SM-5S2ST
Human	GTEx	Tissue	Pancreas		1	Unstranded	Paired-end	2x76	32144801	GTEX-W5WG-0826-SM-4RGNE
Human	GTEx	Tissue	Pancreas		1	Unstranded	Paired-end	2x76	29001049	GTEX-WFG7-0426-SM-4LMK5
Human	GTEx	Tissue	Pancreas		1	Unstranded	Paired-end	2x76	27841292	GTEX-WFG8-0326-SM-4LVN4
Human	GTEx	Tissue	Pancreas		1	Unstranded	Paired-end	2x76	25431541	GTEX-WFJO-0626-SM-4LVMC
Human	GTEx	Tissue	Pancreas		1	Unstranded	Paired-end	2x76	30124936	GTEX-WFON-0626-SM-4LVLX
Human	GTEx	Tissue	Pancreas		2	Unstranded	Paired-end	2x76	54415873	GTEX-WFON-0626-SM-5S2SX
Human	GTEx	Tissue	Pancreas		1	Unstranded	Paired-end	2x76	23853183	GTEX-WH7G-0826-SM-4LVMR
Human	GTEx	Tissue	Pancreas		1	Unstranded	Paired-end	2x76	22947402	GTEX-WHPG-0326-SM-4M1XV
Human	GTEx	Tissue	Pancreas		1	Unstranded	Paired-end	2x76	23960686	GTEX-WHSB-0726-SM-4M1XQ
Human	GTEx	Tissue	Pancreas		1	Unstranded	Paired-end	2x76	23121946	GTEX-WHWD-0726-SM-4OORX
Human	GTEx	Tissue	Pancreas		1	Unstranded	Paired-end	2x76	40969076	GTEX-WI4N-1826-SM-4OOSF
Human	GTEx	Tissue	Pancreas		1	Unstranded	Paired-end	2x76	38632880	GTEX-WQUQ-2126-SM-4OOSO
Human	GTEx	Tissue	Pancreas		1	Unstranded	Paired-end	2x76	28859165	GTEX-WRHK-0226-SM-4MVOH
Human	GTEx	Tissue	Pancreas		1	Unstranded	Paired-end	2x76	27034520	GTEX-WXYG-0826-SM-4ONC7
Human	GTEx	Tissue	Pancreas		1	Unstranded	Paired-end	2x76	31340417	GTEX-WY7C-1026-SM-4OND3
Human	GTEx	Tissue	Pancreas		1	Unstranded	Paired-end	2x76	28304178	GTEX-WYJK-2426-SM-4ONDQ
Human	GTEx	Tissue	Pancreas		1	Unstranded	Paired-end	2x76	29621370	GTEX-WYVS-0926-SM-4SOJV
Human	GTEx	Tissue	Pancreas		1	Unstranded	Paired-end	2x76	29377163	GTEX-X15G-0726-SM-4PQZ5
Human	GTEx	Tissue	Pancreas		1	Unstranded	Paired-end	2x76	34175608	GTEX-X3Y1-0726-SM-3P5YU
Human	GTEx	Tissue	Pancreas		1	Unstranded	Paired-end	2x76	32463172	GTEX-X4LF-0326-SM-4QAS9
Human	GTEx	Tissue	Pancreas		1	Unstranded	Paired-end	2x76	27080818	GTEX-X5EB-0526-SM-46MVP
Human	GTEx	Tissue	Pancreas		1	Unstranded	Paired-end	2x76	31689121	GTEX-XBED-0226-SM-47JY8
Human	GTEx	Tissue	Pancreas		1	Unstranded	Paired-end	2x76	30550297	GTEX-XBEW-1626-SM-4SOJP
Human	GTEx	Tissue	Pancreas		1	Unstranded	Paired-end	2x76	39789933	GTEX-XMK1-0326-SM-4B652
Human	GTEx	Tissue	Pancreas		1	Unstranded	Paired-end	2x76	35440693	GTEX-XPVG-0326-SM-4B653
Human	GTEx	Tissue	Pancreas		1	Unstranded	Paired-end	2x76	33033800	GTEX-XQ8I-1926-SM-4BOOK
Human	GTEx	Tissue	Pancreas		1	Unstranded	Paired-end	2x76	22213771	GTEX-XUW1-1726-SM-4BOOZ
Human	GTEx	Tissue	Pancreas		1	Unstranded	Paired-end	2x76	31596729	GTEX-XV7Q-0926-SM-4BRVQ
Human	GTEx	Tissue	Pancreas		1	Unstranded	Paired-end	2x76	31482083	GTEX-XXEK-1726-SM-4BRVB
Human	GTEx	Tissue	Pancreas		1	Unstranded	Paired-end	2x76	43428689	GTEX-XYKS-1226-SM-4BRVI
Human	GTEx	Tissue	Pancreas		1	Unstranded	Paired-end	2x76	37810381	GTEX-Y114-0826-SM-4TT77
Human	GTEx	Tissue	Pancreas		1	Unstranded	Paired-end	2x76	50242222	GTEX-Y3I4-0826-SM-4TT2A
Human	GTEx	Tissue	Pancreas		1	Unstranded	Paired-end	2x76	39231733	GTEX-Y3IK-0426-SM-4WWE2
Human	GTEx	Tissue	Pancreas		1	Unstranded	Paired-end	2x76	40004494	GTEX-Y5LM-0526-SM-4V6G3
Human	GTEx	Tissue	Pancreas		1	Unstranded	Paired-end	2x76	25308406	GTEX-Y5V5-1026-SM-5LUAH
Human	GTEx	Tissue	Pancreas		1	Unstranded	Paired-end	2x76	33414407	GTEX-Y8E4-1326-SM-5IFIY
Human	GTEx	Tissue	Pancreas		1	Unstranded	Paired-end	2x76	34671970	GTEX-Y8LW-1026-SM-5IFJY
Human	GTEx	Tissue	Pancreas		1	Unstranded	Paired-end	2x76	47020164	GTEX-Y9LG-0726-SM-4VDS3
Human	GTEx	Tissue	Pancreas		1	Unstranded	Paired-end	2x76	39202848	GTEX-YB5E-0526-SM-4VDSD
Human	GTEx	Tissue	Pancreas		1	Unstranded	Paired-end	2x76	31985531	GTEX-YB5K-1826-SM-5IFJC
Human	GTEx	Tissue	Pancreas		1	Unstranded	Paired-end	2x76	30567778	GTEX-YEC3-0626-SM-4YCFE
Human	GTEx	Tissue	Pancreas		2	Unstranded	Paired-end	2x76	39124276	GTEX-YEC3-0626-SM-5IFHZ
Human	GTEx	Tissue	Pancreas		1	Unstranded	Paired-end	2x76	36107894	GTEX-YEC4-1326-SM-5IFHG
Human	GTEx	Tissue	Pancreas		1	Unstranded	Paired-end	2x76	49348431	GTEX-YF7O-1326-SM-4W1ZR
Human	GTEx	Tissue	Pancreas		1	Unstranded	Paired-end	2x76	23883487	GTEX-YFCO-1026-SM-5LU9S
Human	GTEx	Tissue	Pancreas		1	Unstranded	Paired-end	2x76	27348581	GTEX-ZAB4-1726-SM-5HL8C
Human	GTEx	Tissue	Pancreas		1	Unstranded	Paired-end	2x76	43008765	GTEX-ZAB5-0826-SM-5P9FU
Human	GTEx	Tissue	Pancreas		1	Unstranded	Paired-end	2x76	23395820	GTEX-ZAK1-2326-SM-5CVMY
Human	GTEx	Tissue	Pancreas		1	Unstranded	Paired-end	2x76	35804980	GTEX-ZC5H-0826-SM-5N9FH
Human	GTEx	Tissue	Pancreas		1	Unstranded	Paired-end	2x76	28016333	GTEX-ZDTT-1126-SM-4WKFW
Human	GTEx	Tissue	Pancreas		1	Unstranded	Paired-end	2x76	32125873	GTEX-ZDYS-2526-SM-4WKGU
Human	GTEx	Tissue	Pancreas		1	Unstranded	Paired-end	2x76	32497533	GTEX-ZEX8-1026-SM-4WKHE
Human	GTEx	Tissue	Pancreas		1	Unstranded	Paired-end	2x76	30120801	GTEX-ZF29-1126-SM-4WKGO
Human	GTEx	Tissue	Pancreas		1	Unstranded	Paired-end	2x76	29712899	GTEX-ZF2S-0426-SM-4WKGP
Human	GTEx	Tissue	Pancreas		1	Unstranded	Paired-end	2x76	38408789	GTEX-ZF3C-2026-SM-4WWB5
Human	GTEx	Tissue	Pancreas		1	Unstranded	Paired-end	2x76	34779305	GTEX-ZG7Y-0326-SM-4WWEY
Human	GTEx	Tissue	Pancreas		1	Unstranded	Paired-end	2x76	28902930	GTEX-ZLFU-0726-SM-57WF6
Human	GTEx	Tissue	Pancreas		1	Unstranded	Paired-end	2x76	35733536	GTEX-ZLWG-0326-SM-4WWC7
Human	GTEx	Tissue	Pancreas		1	Unstranded	Paired-end	2x76	39612025	GTEX-ZP4G-0426-SM-4YCER
Human	GTEx	Tissue	Pancreas		1	Unstranded	Paired-end	2x76	38388421	GTEX-ZPIC-0926-SM-4WWFK
Human	GTEx	Tissue	Pancreas		1	Unstranded	Paired-end	2x76	27793457	GTEX-ZPU1-0226-SM-4WWC9
Human	GTEx	Tissue	Pancreas		1	Unstranded	Paired-end	2x76	33372715	GTEX-ZT9W-0926-SM-57WFS
Human	GTEx	Tissue	Pancreas		1	Unstranded	Paired-end	2x76	31914842	GTEX-ZTPG-1026-SM-5DUWP
Human	GTEx	Tissue	Pancreas		1	Unstranded	Paired-end	2x76	36939152	GTEX-ZV7C-0726-SM-59HKH
Human	GTEx	Tissue	Pancreas		1	Unstranded	Paired-end	2x76	25484368	GTEX-ZVP2-0726-SM-59HKY
Human	GTEx	Tissue	Pancreas		1	Unstranded	Paired-end	2x76	24602492	GTEX-ZVT2-2026-SM-5NQ8Q
Human	GTEx	Tissue	Pancreas		1	Unstranded	Paired-end	2x76	35146230	GTEX-ZVZP-0626-SM-59HL5
Human	GTEx	Tissue	Pancreas		1	Unstranded	Paired-end	2x76	29502225	GTEX-ZYFG-0826-SM-5BC5T
Human	GTEx	Tissue	Pancreas		1	Unstranded	Paired-end	2x76	29883070	GTEX-ZYT6-1326-SM-5E453
Human	GTEx	Tissue	Pancreas		1	Unstranded	Paired-end	2x76	28956770	GTEX-ZYW4-2126-SM-59HJ9
Human	GTEx	Tissue	Pancreas		1	Unstranded	Paired-end	2x76	35318998	GTEX-ZYWO-1326-SM-5SI8X
Human	GTEx	Tissue	Pancreas		1	Unstranded	Paired-end	2x76	28895971	GTEX-ZYY3-0826-SM-5E44R
Human	GTEx	Tissue	Pancreas		1	Unstranded	Paired-end	2x76	32962335	GTEX-ZZPU-0726-SM-5N9C8
Human	GTEx	Tissue	Prostate		1	Unstranded	Paired-end	2x76	46824792	GTEX-111CU-1526-SM-5N9FS
Human	GTEx	Tissue	Prostate		1	Unstranded	Paired-end	2x76	32821208	GTEX-111FC-2026-SM-5GZYO
Human	GTEx	Tissue	Prostate		1	Unstranded	Paired-end	2x76	28100963	GTEX-111YS-1726-SM-5GIED
Human	GTEx	Tissue	Prostate		1	Unstranded	Paired-end	2x76	23832179	GTEX-117YW-1426-SM-5EGGO
Human	GTEx	Tissue	Prostate		1	Unstranded	Paired-end	2x76	36407957	GTEX-117YX-1526-SM-5H12T
Human	GTEx	Tissue	Prostate		1	Unstranded	Paired-end	2x76	34095553	GTEX-11DXZ-1826-SM-5H12Y
Human	GTEx	Tissue	Prostate		1	Unstranded	Paired-end	2x76	40196902	GTEX-11DYG-2526-SM-5N9BB
Human	GTEx	Tissue	Prostate		1	Unstranded	Paired-end	2x76	24914819	GTEX-11EQ9-1726-SM-5HL6U
Human	GTEx	Tissue	Prostate		1	Unstranded	Paired-end	2x76	28662252	GTEX-11NSD-0826-SM-5986S
Human	GTEx	Tissue	Prostate		1	Unstranded	Paired-end	2x76	32306304	GTEX-11O72-2726-SM-5HL6K
Human	GTEx	Tissue	Prostate		1	Unstranded	Paired-end	2x76	30227542	GTEX-11OF3-1726-SM-5GU5Q
Human	GTEx	Tissue	Prostate		1	Unstranded	Paired-end	2x76	32185381	GTEX-11P7K-0626-SM-5985Z
Human	GTEx	Tissue	Prostate		1	Unstranded	Paired-end	2x76	30093098	GTEX-11P82-1126-SM-5BC5K
Human	GTEx	Tissue	Prostate		1	Unstranded	Paired-end	2x76	35195083	GTEX-11TT1-2026-SM-5EQM8
Human	GTEx	Tissue	Prostate		1	Unstranded	Paired-end	2x76	25720051	GTEX-11TUW-2126-SM-5GU7B
Human	GTEx	Tissue	Prostate		1	Unstranded	Paired-end	2x76	30376303	GTEX-11WQK-2726-SM-5EQMU
Human	GTEx	Tissue	Prostate		1	Unstranded	Paired-end	2x76	49144377	GTEX-11ZUS-2126-SM-5N9E6
Human	GTEx	Tissue	Prostate		1	Unstranded	Paired-end	2x76	28071394	GTEX-12696-2226-SM-5EQ65
Human	GTEx	Tissue	Prostate		1	Unstranded	Paired-end	2x76	33966809	GTEX-12BJ1-1226-SM-5LUAE
Human	GTEx	Tissue	Prostate		1	Unstranded	Paired-end	2x76	35950336	GTEX-12C56-1326-SM-5FQSV
Human	GTEx	Tissue	Prostate		1	Unstranded	Paired-end	2x76	27488468	GTEX-12ZZZ-2026-SM-5LZWJ
Human	GTEx	Tissue	Prostate		1	Unstranded	Paired-end	2x76	30219767	GTEX-13111-1326-SM-5GCNO
Human	GTEx	Tissue	Prostate		1	Unstranded	Paired-end	2x76	24138039	GTEX-131XF-1926-SM-5DUW4
Human	GTEx	Tissue	Prostate		1	Unstranded	Paired-end	2x76	45957483	GTEX-132NY-2826-SM-5P9G2
Human	GTEx	Tissue	Prostate		1	Unstranded	Paired-end	2x76	46191886	GTEX-132QS-1126-SM-5P9GC
Human	GTEx	Tissue	Prostate		1	Unstranded	Paired-end	2x76	36777495	GTEX-1399R-0526-SM-5IJEF
Human	GTEx	Tissue	Prostate		1	Unstranded	Paired-end	2x76	45864491	GTEX-1399T-1226-SM-5P9J5
Human	GTEx	Tissue	Prostate		1	Unstranded	Paired-end	2x76	51983172	GTEX-139T6-1526-SM-5P9G6
Human	GTEx	Tissue	Prostate		1	Unstranded	Paired-end	2x76	31534474	GTEX-13FHO-2826-SM-5K7ZA
Human	GTEx	Tissue	Prostate		1	Unstranded	Paired-end	2x76	30649127	GTEX-13FTW-1226-SM-5LZZ1
Human	GTEx	Tissue	Prostate		1	Unstranded	Paired-end	2x76	29413742	GTEX-13FXS-2826-SM-5LZYC
Human	GTEx	Tissue	Prostate		1	Unstranded	Paired-end	2x76	26365699	GTEX-13G51-2326-SM-5LZXV
Human	GTEx	Tissue	Prostate		1	Unstranded	Paired-end	2x76	29370494	GTEX-13N2G-1826-SM-5KM1I
Human	GTEx	Tissue	Prostate		1	Unstranded	Paired-end	2x76	28576390	GTEX-13NYS-1026-SM-5KLZT
Human	GTEx	Tissue	Prostate		1	Unstranded	Paired-end	2x76	46693670	GTEX-13O21-1126-SM-5N9EV
Human	GTEx	Tissue	Prostate		1	Unstranded	Paired-end	2x76	32690244	GTEX-13O61-1726-SM-5KM46
Human	GTEx	Tissue	Prostate		1	Unstranded	Paired-end	2x76	42344338	GTEX-13OW8-0426-SM-5J2NR
Human	GTEx	Tissue	Prostate		1	Unstranded	Paired-end	2x76	31609306	GTEX-13RTJ-2126-SM-5S2PZ
Human	GTEx	Tissue	Prostate		1	Unstranded	Paired-end	2x76	32968448	GTEX-144GM-0826-SM-5O98R
Human	GTEx	Tissue	Prostate		1	Unstranded	Paired-end	2x76	36570159	GTEX-145LT-0626-SM-5O99E
Human	GTEx	Tissue	Prostate		1	Unstranded	Paired-end	2x76	39045662	GTEX-145LU-2126-SM-5Q5E9
Human	GTEx	Tissue	Prostate		1	Unstranded	Paired-end	2x76	28246790	GTEX-145LV-1226-SM-5S2QH
Human	GTEx	Tissue	Prostate		1	Unstranded	Paired-end	2x76	26817959	GTEX-146FQ-1726-SM-5QGPX
Human	GTEx	Tissue	Prostate		1	Unstranded	Paired-end	2x76	29737282	GTEX-1477Z-2226-SM-5QGPG
Human	GTEx	Tissue	Prostate		1	Unstranded	Paired-end	2x76	34081594	GTEX-148VJ-1826-SM-5Q5DV
Human	GTEx	Tissue	Prostate		1	Unstranded	Paired-end	2x76	38910477	GTEX-14ABY-0726-SM-5Q5DF
Human	GTEx	Tissue	Prostate		1	Unstranded	Paired-end	2x76	28876161	GTEX-14BMV-2326-SM-5RQJ4
Human	GTEx	Tissue	Prostate		1	Unstranded	Paired-end	2x76	34942119	GTEX-14C5O-2826-SM-5RQI6
Human	GTEx	Tissue	Prostate		1	Unstranded	Paired-end	2x76	27903997	GTEX-14E6E-1126-SM-5S2R4
Human	GTEx	Tissue	Prostate		1	Unstranded	Paired-end	2x76	62287784	GTEX-NFK9-2226-SM-3MJGP
Human	GTEx	Tissue	Prostate		1	Unstranded	Paired-end	2x76	43325422	GTEX-NPJ8-2426-SM-3MJHL
Human	GTEx	Tissue	Prostate		1	Unstranded	Paired-end	2x76	52539458	GTEX-OIZH-2026-SM-3NB1M
Human	GTEx	Tissue	Prostate		1	Unstranded	Paired-end	2x76	37074733	GTEX-OOBJ-2026-SM-3NB1R
Human	GTEx	Tissue	Prostate		1	Unstranded	Paired-end	2x76	42900048	GTEX-OOBK-2025-SM-3LK5S
Human	GTEx	Tissue	Prostate		1	Unstranded	Paired-end	2x76	39905809	GTEX-P4QS-2026-SM-3NMCG
Human	GTEx	Tissue	Prostate		1	Unstranded	Paired-end	2x76	41500348	GTEX-PLZ6-1126-SM-3P5ZR
Human	GTEx	Tissue	Prostate		1	Unstranded	Paired-end	2x76	31352744	GTEX-Q2AI-1126-SM-48U19
Human	GTEx	Tissue	Prostate		1	Unstranded	Paired-end	2x76	26158466	GTEX-QEG4-2226-SM-4R1JM
Human	GTEx	Tissue	Prostate		1	Unstranded	Paired-end	2x76	32703535	GTEX-QLQ7-1326-SM-4R1JY
Human	GTEx	Tissue	Prostate		1	Unstranded	Paired-end	2x76	34594579	GTEX-QMRM-1426-SM-4R1K8
Human	GTEx	Tissue	Prostate		1	Unstranded	Paired-end	2x76	24362931	GTEX-QV31-1026-SM-4R1K3
Human	GTEx	Tissue	Prostate		1	Unstranded	Paired-end	2x76	27346680	GTEX-QV44-1526-SM-4R1KI
Human	GTEx	Tissue	Prostate		1	Unstranded	Paired-end	2x76	27465819	GTEX-REY6-2126-SM-48FD9
Human	GTEx	Tissue	Prostate		1	Unstranded	Paired-end	2x76	35692381	GTEX-RM2N-1126-SM-48FCY
Human	GTEx	Tissue	Prostate		1	Unstranded	Paired-end	2x76	40845499	GTEX-RWSA-2026-SM-47JX8
Human	GTEx	Tissue	Prostate		1	Unstranded	Paired-end	2x76	43074650	GTEX-S33H-1826-SM-4AD65
Human	GTEx	Tissue	Prostate		1	Unstranded	Paired-end	2x76	32320416	GTEX-S3XE-1326-SM-4AD4H
Human	GTEx	Tissue	Prostate		1	Unstranded	Paired-end	2x76	31297260	GTEX-S4Q7-1026-SM-4AD75
Human	GTEx	Tissue	Prostate		1	Unstranded	Paired-end	2x76	37154114	GTEX-S95S-1026-SM-4B64M
Human	GTEx	Tissue	Prostate		1	Unstranded	Paired-end	2x76	24934354	GTEX-SJXC-2026-SM-4DM6N
Human	GTEx	Tissue	Prostate		1	Unstranded	Paired-end	2x76	23235117	GTEX-SNMC-0926-SM-4DM5U
Human	GTEx	Tissue	Prostate		1	Unstranded	Paired-end	2x76	25770038	GTEX-SNOS-1026-SM-4DM4Y
Human	GTEx	Tissue	Prostate		1	Unstranded	Paired-end	2x76	33629563	GTEX-SUCS-1126-SM-4DM61
Human	GTEx	Tissue	Prostate		1	Unstranded	Paired-end	2x76	26404666	GTEX-T5JC-1226-SM-4DM7C
Human	GTEx	Tissue	Prostate		1	Unstranded	Paired-end	2x76	34530131	GTEX-T8EM-1826-SM-4DM7F
Human	GTEx	Tissue	Prostate		1	Unstranded	Paired-end	2x76	25595982	GTEX-U3ZH-0926-SM-4DXU4
Human	GTEx	Tissue	Prostate		1	Unstranded	Paired-end	2x76	33693755	GTEX-U3ZM-0926-SM-4DXSW
Human	GTEx	Tissue	Prostate		1	Unstranded	Paired-end	2x76	30890304	GTEX-U412-2026-SM-4DXSI
Human	GTEx	Tissue	Prostate		1	Unstranded	Paired-end	2x76	29977906	GTEX-U4B1-1426-SM-4DXTX
Human	GTEx	Tissue	Prostate		1	Unstranded	Paired-end	2x76	34872500	GTEX-U8XE-2526-SM-4E3IT
Human	GTEx	Tissue	Prostate		1	Unstranded	Paired-end	2x76	34451146	GTEX-UTHO-2726-SM-4JBH9
Human	GTEx	Tissue	Prostate		1	Unstranded	Paired-end	2x76	36546993	GTEX-V1D1-1926-SM-4JBGX
Human	GTEx	Tissue	Prostate		1	Unstranded	Paired-end	2x76	34487548	GTEX-V955-1826-SM-4JBIL
Human	GTEx	Tissue	Prostate		1	Unstranded	Paired-end	2x76	17909646	GTEX-VJYA-1226-SM-3GIJ6
Human	GTEx	Tissue	Prostate		1	Unstranded	Paired-end	2x76	26408560	GTEX-WFG7-1826-SM-3GIL1
Human	GTEx	Tissue	Prostate		1	Unstranded	Paired-end	2x76	25911072	GTEX-WFG8-1826-SM-4LVM4
Human	GTEx	Tissue	Prostate		1	Unstranded	Paired-end	2x76	24819753	GTEX-WFON-1626-SM-4LVMV
Human	GTEx	Tissue	Prostate		1	Unstranded	Paired-end	2x76	25342857	GTEX-WH7G-1726-SM-4LVKY
Human	GTEx	Tissue	Prostate		1	Unstranded	Paired-end	2x76	50409040	GTEX-WK11-2626-SM-4OOSK
Human	GTEx	Tissue	Prostate		1	Unstranded	Paired-end	2x76	24441573	GTEX-WOFM-0326-SM-4OOSL
Human	GTEx	Tissue	Prostate		1	Unstranded	Paired-end	2x76	30005936	GTEX-WY7C-2026-SM-4ONCM
Human	GTEx	Tissue	Prostate		1	Unstranded	Paired-end	2x76	35034532	GTEX-WYJK-0626-SM-4ONCZ
Human	GTEx	Tissue	Prostate		1	Unstranded	Paired-end	2x76	24713382	GTEX-WZTO-0926-SM-4PQZ3
Human	GTEx	Tissue	Prostate		1	Unstranded	Paired-end	2x76	36471291	GTEX-X5EB-1826-SM-4E3K8
Human	GTEx	Tissue	Prostate		1	Unstranded	Paired-end	2x76	32847339	GTEX-XAJ8-0626-SM-47JY4
Human	GTEx	Tissue	Prostate		1	Unstranded	Paired-end	2x76	31845248	GTEX-XGQ4-1826-SM-4AT6F
Human	GTEx	Tissue	Prostate		1	Unstranded	Paired-end	2x76	41974580	GTEX-XMK1-1026-SM-4B65H
Human	GTEx	Tissue	Prostate		1	Unstranded	Paired-end	2x76	30349426	GTEX-XOTO-2826-SM-4B65I
Human	GTEx	Tissue	Prostate		1	Unstranded	Paired-end	2x76	43890036	GTEX-XPVG-2026-SM-4B65E
Human	GTEx	Tissue	Prostate		1	Unstranded	Paired-end	2x76	25276184	GTEX-XQ3S-2526-SM-4BOOG
Human	GTEx	Tissue	Prostate		1	Unstranded	Paired-end	2x76	37056228	GTEX-XXEK-1226-SM-4BRUY
Human	GTEx	Tissue	Prostate		1	Unstranded	Paired-end	2x76	28871834	GTEX-Y8E4-2126-SM-5RQHO
Human	GTEx	Tissue	Prostate		1	Unstranded	Paired-end	2x76	46740258	GTEX-Y9LG-1826-SM-4VBQC
Human	GTEx	Tissue	Prostate		1	Unstranded	Paired-end	2x76	33760741	GTEX-YB5E-1826-SM-5IFI4
Human	GTEx	Tissue	Prostate		1	Unstranded	Paired-end	2x76	56582329	GTEX-YF7O-1926-SM-4W1YQ
Human	GTEx	Tissue	Prostate		1	Unstranded	Paired-end	2x76	54801943	GTEX-YFCO-1626-SM-4W1Z3
Human	GTEx	Tissue	Prostate		1	Unstranded	Paired-end	2x76	34419617	GTEX-YJ8A-1126-SM-5IFJU
Human	GTEx	Tissue	Prostate		1	Unstranded	Paired-end	2x76	38562020	GTEX-ZDYS-1226-SM-5IJF3
Human	GTEx	Tissue	Prostate		1	Unstranded	Paired-end	2x76	32684329	GTEX-ZEX8-2026-SM-4WKF3
Human	GTEx	Tissue	Prostate		1	Unstranded	Paired-end	2x76	30397882	GTEX-ZLFU-1726-SM-4WWBU
Human	GTEx	Tissue	Prostate		1	Unstranded	Paired-end	2x76	29703162	GTEX-ZPU1-2026-SM-57WFI
Human	GTEx	Tissue	Prostate		1	Unstranded	Paired-end	2x76	42010547	GTEX-ZT9W-1626-SM-4YCDQ
Human	GTEx	Tissue	Prostate		1	Unstranded	Paired-end	2x76	35490407	GTEX-ZTTD-2726-SM-57WFA
Human	GTEx	Tissue	Prostate		1	Unstranded	Paired-end	2x76	26169222	GTEX-ZTX8-1026-SM-5EGHD
Human	GTEx	Tissue	Prostate		1	Unstranded	Paired-end	2x76	29325214	GTEX-ZUA1-2826-SM-59HLE
Human	GTEx	Tissue	Prostate		1	Unstranded	Paired-end	2x76	30772895	GTEX-ZVP2-0826-SM-59HJ6
Human	GTEx	Tissue	Prostate		1	Unstranded	Paired-end	2x76	36271287	GTEX-ZY6K-1526-SM-5GZXE
Human	GTEx	Tissue	Prostate		1	Unstranded	Paired-end	2x76	30658412	GTEX-ZYFD-2526-SM-5E45L
Human	GTEx	Tissue	Prostate		1	Unstranded	Paired-end	2x76	30032627	GTEX-ZZ64-0926-SM-5E44L
Human	GTEx	Tissue	Testis		1	Unstranded	Paired-end	2x76	28470831	GTEX-111CU-1726-SM-5EGHM
Human	GTEx	Tissue	Testis		1	Unstranded	Paired-end	2x76	38822580	GTEX-111FC-1926-SM-5GZYC
Human	GTEx	Tissue	Testis		1	Unstranded	Paired-end	2x76	27784720	GTEX-111VG-1926-SM-5GIDO
Human	GTEx	Tissue	Testis		1	Unstranded	Paired-end	2x76	30933756	GTEX-111YS-2026-SM-5EGGL
Human	GTEx	Tissue	Testis		1	Unstranded	Paired-end	2x76	32158547	GTEX-117XS-2026-SM-5GID1
Human	GTEx	Tissue	Testis		1	Unstranded	Paired-end	2x76	26849721	GTEX-117YW-1526-SM-5EGGP
Human	GTEx	Tissue	Testis		1	Unstranded	Paired-end	2x76	27081029	GTEX-117YX-2026-SM-5GIEF
Human	GTEx	Tissue	Testis		1	Unstranded	Paired-end	2x76	35756787	GTEX-1192W-2326-SM-5N9BS
Human	GTEx	Tissue	Testis		1	Unstranded	Paired-end	2x76	31923346	GTEX-11DXY-0226-SM-5H123
Human	GTEx	Tissue	Testis		1	Unstranded	Paired-end	2x76	38504994	GTEX-11DXZ-2126-SM-59881
Human	GTEx	Tissue	Testis		1	Unstranded	Paired-end	2x76	41382551	GTEX-11EI6-2226-SM-5EGJM
Human	GTEx	Tissue	Testis		1	Unstranded	Paired-end	2x76	33523595	GTEX-11EQ8-1426-SM-5EGJR
Human	GTEx	Tissue	Testis		1	Unstranded	Paired-end	2x76	35060743	GTEX-11EQ9-1926-SM-5PNVV
Human	GTEx	Tissue	Testis		1	Unstranded	Paired-end	2x76	30623605	GTEX-11GS4-2026-SM-5N9CP
Human	GTEx	Tissue	Testis		1	Unstranded	Paired-end	2x76	35507549	GTEX-11LCK-2326-SM-5HL53
Human	GTEx	Tissue	Testis		1	Unstranded	Paired-end	2x76	38459202	GTEX-11NSD-1026-SM-5N9BE
Human	GTEx	Tissue	Testis		1	Unstranded	Paired-end	2x76	33965815	GTEX-11NUK-2626-SM-5A5MB
Human	GTEx	Tissue	Testis		1	Unstranded	Paired-end	2x76	40535870	GTEX-11NV4-1726-SM-5N9FC
Human	GTEx	Tissue	Testis		1	Unstranded	Paired-end	2x76	57719370	GTEX-11O72-0726-SM-5P9GO
Human	GTEx	Tissue	Testis		1	Unstranded	Paired-end	2x76	43070988	GTEX-11OF3-1826-SM-5987N
Human	GTEx	Tissue	Testis		1	Unstranded	Paired-end	2x76	30860877	GTEX-11ONC-2226-SM-5HL6D
[truncated: 2,945 more rows]
