# Supplementary material for: High-confidence coding and noncoding transcriptome maps
Source: HighWire-hosted journal article supplement (doi:10.1101/gr.214288.116), 2017-04-10
Supplement: Supplemental_Table_S4.xlsx [file Supplemental_Table_S4.xlsx]

## Sheet: Table S4
Table S4. Statistics of annotations
Annotations	Genes	Transcripts	Exons	Introns
RefSeq	23982	42709	230903	212045
GENCODE (manual)	47971	175025	534198	336853
GENCODE (automatic)	17720	21391	106407	88146
MiTranscriptome	91013	384016	730761	524525
PacBio (MCF7)	15688	47416	139273	119321
BIGTranscriptome	46634	338359	580429	378707
BIGTranscriptome-TS (Cerebellum)	50894	398255	531438	309209
BIGTranscriptome-TS (Cortex)	50336	377405	527907	311858
BIGTranscriptome-TS (FrontalCortex)	48947	366459	518710	309622
BIGTranscriptome-TS (Hippocampus)	50328	368102	523288	311140
BIGTranscriptome-TS (Hypothalamus)	51082	373781	530247	314720
BIGTranscriptome-TS (Esophagus)	52228	440554	541153	309415
BIGTranscriptome-TS (Kidney)	50867	364013	522635	307142
BIGTranscriptome-TS (Liver)	47801	379428	516790	304247
BIGTranscriptome-TS (Lung)	53937	440174	566214	325959
BIGTranscriptome-TS (Ovary)	50225	391050	534170	309979
BIGTranscriptome-TS (Pancreas)	49999	425479	548626	317411
BIGTranscriptome-TS (Prostate)	52298	409584	556124	319172
BIGTranscriptome-TS (Testis)	53268	436250	587115	341636
BIGTranscriptome-TS (WholeBlood)	56077	517356	616055	337394
BIGTranscriptome-TS (ESCA)	54951	428592	576631	340027
BIGTranscriptome-TS (HNSC)	56084	401805	583881	327876
BIGTranscriptome-TS (LIHC)	52950	411363	572585	336881
BIGTranscriptome-TS (LUAD)	56369	416898	590440	330288
BIGTranscriptome-TS (LUSC)	54269	408600	561458	328448
