# Supplementary material for: High-confidence coding and noncoding transcriptome maps
Source: HighWire-hosted journal article supplement (doi:10.1101/gr.214288.116), 2017-04-10
Supplement: Supplemental_Table_S5.xlsx [file Supplemental_Table_S5.xlsx]

## Sheet: Table S5
Table S5. Independent genes
Annotations		Genes		TSS and CPS			TSS or CPS			Not supported
		#		#	%		#	%		#	%
RefSeq		23982		7702	32.11		9992	41.66		6288	6.22
GENCODE (manual)		47971		6522	13.59		17562	36.60		23887	49.79
GENCODE (automatic)		17720		1301	7.34		4831	27.26		11588	65.39
MiTranscriptome		91013		5741	6.30		21851	24.00		63421	69.68
PacBio (MCF7)		15688		3735	23.81		8749	55.77		3204	20.42
BIGTranscriptome		46634		16376	35.11		11219	24.05		19039	40.82
BIGTranscriptome-TS (Cerebellum)		50894		16509	32.44		12625	24.81		21760	42.75
BIGTranscriptome-TS (Cortex)		50336		15327	30.12		13518	26.56		21491	43.32
BIGTranscriptome-TS (FrontalCortex)		48947		15234	29.93		12263	24.10		21450	45.97
BIGTranscriptome-TS (Hippocampus)		50328		17346	34.08		15643	30.74		17339	35.18
BIGTranscriptome-TS (Hypothalamus)		51082		17848	35.07		15884	31.21		17350	33.72
BIGTranscriptome-TS (Esophagus)		52228		17455	33.42		15848	30.34		18925	36.24
BIGTranscriptome-TS (Kidney)		50867		14604	28.69		12166	23.90		24097	47.41
BIGTranscriptome-TS (Liver)		47801		18398	36.15		14971	29.42		14432	34.43
BIGTranscriptome-TS (Lung)		53937		17807	33.02		16986	31.49		19144	35.49
BIGTranscriptome-TS (Ovary)		50225		16613	32.46		12853	25.25		20759	42.29
BIGTranscriptome-TS (Pancreas)		49999		14387	28.27		15582	30.62		20030	41.11
BIGTranscriptome-TS (Prostate)		52298		14783	29.05		13520	26.57		23995	44.38
BIGTranscriptome-TS (Testis)		53268		17645	34.67		17806	34.99		17817	30.34
BIGTranscriptome-TS (WholeBlood)		56077		18238	35.84		22157	43.54		15682	20.62
BIGTranscriptome-TS (ESCA)		54951		19114	34.78		20078	36.54		15759	28.68
BIGTranscriptome-TS (HNSC)		56084		15844	28.25		17147	30.57		23093	41.18
BIGTranscriptome-TS (LIHC)		50950		17398	34.18		19366	38.05		14186	27.77
BIGTranscriptome-TS (LUAD)		56369		18119	32.14		17088	30.31		21162	37.54
BIGTranscriptome-TS (LUSC)		54269		18550	34.18		18900	34.83		16819	30.99
