# Supplementary material for: High-confidence coding and noncoding transcriptome maps
Source: HighWire-hosted journal article supplement (doi:10.1101/gr.214288.116), 2017-04-10
Supplement: Supplemental_Table_S6.xlsx [file Supplemental_Table_S6.xlsx]

## Sheet: Table S6
Table S6A. Single-exonic transcripts
Annotations		Single-exonic transcripts		Unstranded transcripts			Independent transcripts
		#		#	%		#	%
RefSeq		3937		0	0		458	11.63
GENCODE (manual)		14740		0	0		989	6.70
GENCODE (automatic)		10087		0	0		105	1.04
MiTranscriptome		39901		14102	35.34		1216	3.04
PacBio (MCF7)		5107		0	0		1068	20.91
BIGTranscriptome		18642		0	0		6011	32.24
BIGTranscriptome-TS (Cerebellum)		20118		0	0		7437	36.97
BIGTranscriptome-TS (Cortex)		16801		0	0		6482	38.58
BIGTranscriptome-TS (Frontal)		13818		0	0		5970	43.20
BIGTranscriptome-TS (Hippocampus)		15680		0	0		6340	40.43
BIGTranscriptome-TS (Hypothalamus)		16887		0	0		6450	38.20
BIGTranscriptome-TS (Esophagus)		18869		0	0		6892	36.53
BIGTranscriptome-TS (Kidney)		16936		0	0		7178	42.38
BIGTranscriptome-TS (Liver)		15052		0	0		7320	48.63
BIGTranscriptome-TS (Lung)		14268		0	0		6509	45.62
BIGTranscriptome-TS (Ovary)		18338		0	0		7550	41.17
BIGTranscriptome-TS (Pancreas)		15930		0	0		6577	41.29
BIGTranscriptome-TS (Prostate)		21708		0	0		8151	37.55
BIGTranscriptome-TS (Testis)		19209		0	0		6702	34.89
BIGTranscriptome-TS (Wholeblood)		23185		0	0		7601	32.78
BIGTranscriptome-TS (ESCA)		21381		0	0		5453	25.50
BIGTranscriptome-TS (HNSC)		25704		0	0		6745	26.24
BIGTranscriptome-TS (LIHC)		22021		0	0		5979	27.15
BIGTranscriptome-TS (LUAD)		21785		0	0		7935	36.42
BIGTranscriptome-TS (LUSC)		22754		0	0		6443	28.32
Table S6B. Confirmed partial fragments
Annotations		Putative partial fragments		Partial fragments confirmed by BIGTranscriptome
		#		#	%
RefSeq		3479		50	1.43
GENCODE (manual)		13751		55	0.39
GENCODE (automatic)		9982		364	3.64
MiTranscriptome		38685		1434	3.70
PacBio (MCF7)		4039		67	1.65
