# Supplementary material for: High-confidence coding and noncoding transcriptome maps
Source: HighWire-hosted journal article supplement (doi:10.1101/gr.214288.116), 2017-04-10
Supplement: Supplemental_Table_S7.xlsx [file Supplemental_Table_S7.xlsx]

## Sheet: Table S7
Table S7. Putative splice sites
Annotations	Putative splice sites	Canonical putative splice sites (%)	Noncanonical putative splice sites (%)
MiTranscriptome	258801	84.37	15.63
PacBio (MCF7)	11115	73.80	26.20
BIGTranscriptome	29274	86.96	13.04
