# Supplementary material for: High-confidence coding and noncoding transcriptome maps
Source: HighWire-hosted journal article supplement (doi:10.1101/gr.214288.116), 2017-04-10
Supplement: Supplemental_Table_S8.xlsx [file Supplemental_Table_S8.xlsx]

## Sheet: Table S8
Table S8. List of novel lncRNAs
Gene_id	Transcript_id	Chromosome	Strand	Coordination	Exon_count	Supported_by_CAGE-seq	Supported_by_3P-seq
BIG-lncRNA-1	BIG-lncRNA-1.1	chr1	+	363112-364354	2	No	No
BIG-lncRNA-2	BIG-lncRNA-2.1	chr1	-	1866178-1867085	2	No	No
BIG-lncRNA-3	BIG-lncRNA-3.1	chr1	+	2509548-2510446	2	No	No
BIG-lncRNA-4	BIG-lncRNA-4.1	chr1	+	2614821-2622894	2	No	No
BIG-lncRNA-5	BIG-lncRNA-5.1	chr1	+	6997076-6998014	2	Yes	No
BIG-lncRNA-6	BIG-lncRNA-6.1	chr1	-	7965378-7966016	2	No	No
BIG-lncRNA-7	BIG-lncRNA-7.1	chr1	+	8200042-8215201	2	No	No
BIG-lncRNA-8	BIG-lncRNA-8.1	chr1	-	8489331-8499129	3	Yes	No
BIG-lncRNA-9	BIG-lncRNA-9.1	chr1	-	8674953-8682543	3	Yes	No
BIG-lncRNA-10	BIG-lncRNA-10.1	chr1	-	8749800-8755645	1	Yes	Yes
BIG-lncRNA-11	BIG-lncRNA-11.1	chr1	-	9195751-9222992	2	Yes	No
BIG-lncRNA-12	BIG-lncRNA-12.1	chr1	-	10733445-10753551	2	Yes	No
BIG-lncRNA-12	BIG-lncRNA-12.2	chr1	-	10736384-10753551	2	Yes	No
BIG-lncRNA-12	BIG-lncRNA-12.3	chr1	-	10742437-10753551	2	Yes	No
BIG-lncRNA-12	BIG-lncRNA-12.4	chr1	-	10743564-10753551	2	Yes	No
BIG-lncRNA-12	BIG-lncRNA-12.5	chr1	-	10744660-10753551	2	Yes	No
BIG-lncRNA-12	BIG-lncRNA-12.6	chr1	-	10745274-10753551	2	Yes	No
BIG-lncRNA-12	BIG-lncRNA-12.7	chr1	-	10746160-10753551	2	Yes	No
BIG-lncRNA-12	BIG-lncRNA-12.8	chr1	-	10748749-10753551	2	Yes	No
BIG-lncRNA-12	BIG-lncRNA-12.9	chr1	-	10750139-10753551	2	Yes	No
BIG-lncRNA-13	BIG-lncRNA-13.1	chr1	-	12106923-12107391	2	No	No
BIG-lncRNA-14	BIG-lncRNA-14.1	chr1	-	15936493-15937638	2	No	No
BIG-lncRNA-15	BIG-lncRNA-15.1	chr1	-	16173225-16174007	2	Yes	Yes
BIG-lncRNA-15	BIG-lncRNA-15.2	chr1	-	16173262-16174007	2	Yes	Yes
BIG-lncRNA-16	BIG-lncRNA-16.1	chr1	+	17231448-17231831	1	Yes	Yes
BIG-lncRNA-17	BIG-lncRNA-17.1	chr1	-	17783135-17811216	2	No	No
BIG-lncRNA-18	BIG-lncRNA-18.1	chr1	+	29655579-29660618	2	No	No
BIG-lncRNA-19	BIG-lncRNA-19.1	chr1	-	30162619-30192060	4	No	No
BIG-lncRNA-20	BIG-lncRNA-20.1	chr1	-	33867775-33886868	2	Yes	Yes
BIG-lncRNA-20	BIG-lncRNA-20.2	chr1	-	33867775-33886868	2	Yes	Yes
BIG-lncRNA-20	BIG-lncRNA-20.3	chr1	-	33867775-33886868	2	Yes	Yes
BIG-lncRNA-21	BIG-lncRNA-21.1	chr1	-	36187869-36190595	2	No	No
BIG-lncRNA-22	BIG-lncRNA-22.1	chr1	+	36235802-36272400	3	No	No
BIG-lncRNA-23	BIG-lncRNA-23.1	chr1	-	36577814-36580442	2	No	No
BIG-lncRNA-24	BIG-lncRNA-24.1	chr1	-	37233750-37235836	2	No	No
BIG-lncRNA-25	BIG-lncRNA-25.1	chr1	+	38061753-38062546	2	Yes	No
BIG-lncRNA-26	BIG-lncRNA-26.1	chr1	-	41991541-41993975	2	No	No
BIG-lncRNA-27	BIG-lncRNA-27.1	chr1	-	42060513-42089064	7	Yes	No
BIG-lncRNA-27	BIG-lncRNA-27.2	chr1	-	42060513-42089064	4	Yes	No
BIG-lncRNA-27	BIG-lncRNA-27.3	chr1	-	42062144-42089064	7	Yes	No
BIG-lncRNA-27	BIG-lncRNA-27.4	chr1	-	42062144-42089064	4	Yes	No
BIG-lncRNA-27	BIG-lncRNA-27.5	chr1	-	42062144-42089064	7	Yes	No
BIG-lncRNA-27	BIG-lncRNA-27.6	chr1	-	42069755-42089064	7	Yes	No
BIG-lncRNA-27	BIG-lncRNA-27.7	chr1	-	42071287-42089064	4	Yes	No
BIG-lncRNA-27	BIG-lncRNA-27.8	chr1	-	42072364-42089064	7	Yes	No
BIG-lncRNA-27	BIG-lncRNA-27.9	chr1	-	42072364-42089064	7	Yes	No
BIG-lncRNA-27	BIG-lncRNA-27.10	chr1	-	42075283-42089064	7	Yes	No
BIG-lncRNA-27	BIG-lncRNA-27.11	chr1	-	42077802-42089064	4	Yes	No
BIG-lncRNA-27	BIG-lncRNA-27.12	chr1	-	42079207-42089064	4	Yes	No
BIG-lncRNA-27	BIG-lncRNA-27.13	chr1	-	42080923-42089064	4	Yes	No
BIG-lncRNA-28	BIG-lncRNA-28.1	chr1	-	42089324-42119623	4	Yes	No
BIG-lncRNA-28	BIG-lncRNA-28.2	chr1	-	42089589-42119623	5	Yes	No
BIG-lncRNA-28	BIG-lncRNA-28.3	chr1	-	42089589-42119623	8	Yes	No
BIG-lncRNA-29	BIG-lncRNA-29.1	chr1	+	44381103-44382696	1	Yes	Yes
BIG-lncRNA-30	BIG-lncRNA-30.1	chr1	-	45205461-45213340	4	No	No
BIG-lncRNA-31	BIG-lncRNA-31.1	chr1	-	45715422-45716876	2	No	No
BIG-lncRNA-32	BIG-lncRNA-32.1	chr1	+	52045560-52047978	2	No	No
BIG-lncRNA-33	BIG-lncRNA-33.1	chr1	-	56400742-56402318	2	No	No
BIG-lncRNA-34	BIG-lncRNA-34.1	chr1	-	56678866-56680729	2	Yes	No
BIG-lncRNA-35	BIG-lncRNA-35.1	chr1	-	58625043-58628055	2	No	No
BIG-lncRNA-36	BIG-lncRNA-36.1	chr1	-	58869091-58904174	6	Yes	No
BIG-lncRNA-37	BIG-lncRNA-37.1	chr1	+	59397611-59406274	3	No	No
BIG-lncRNA-38	BIG-lncRNA-38.1	chr1	-	61087393-61091776	2	Yes	Yes
BIG-lncRNA-38	BIG-lncRNA-38.2	chr1	-	61087393-61102893	6	No	Yes
BIG-lncRNA-38	BIG-lncRNA-38.3	chr1	-	61087394-61091776	1	Yes	Yes
BIG-lncRNA-38	BIG-lncRNA-38.4	chr1	-	61087394-61088204	1	Yes	Yes
BIG-lncRNA-39	BIG-lncRNA-39.1	chr1	+	61555387-61587199	13	Yes	Yes
BIG-lncRNA-39	BIG-lncRNA-39.2	chr1	+	61555387-61587199	13	Yes	Yes
BIG-lncRNA-39	BIG-lncRNA-39.3	chr1	+	61555387-61587199	15	Yes	Yes
BIG-lncRNA-39	BIG-lncRNA-39.4	chr1	+	61567195-61587199	12	No	Yes
BIG-lncRNA-39	BIG-lncRNA-39.5	chr1	+	61568369-61587199	15	No	Yes
BIG-lncRNA-39	BIG-lncRNA-39.6	chr1	+	61568433-61587199	12	No	Yes
BIG-lncRNA-39	BIG-lncRNA-39.7	chr1	+	61573549-61587199	15	No	Yes
BIG-lncRNA-40	BIG-lncRNA-40.1	chr1	+	61606661-61616860	4	Yes	No
BIG-lncRNA-41	BIG-lncRNA-41.1	chr1	+	61651329-61669128	6	Yes	No
BIG-lncRNA-41	BIG-lncRNA-41.2	chr1	+	61651329-61660843	4	Yes	No
BIG-lncRNA-42	BIG-lncRNA-42.1	chr1	+	61669175-61671570	2	Yes	No
BIG-lncRNA-43	BIG-lncRNA-43.1	chr1	+	61691245-61719003	5	Yes	No
BIG-lncRNA-44	BIG-lncRNA-44.1	chr1	-	63248269-63249742	1	Yes	Yes
BIG-lncRNA-45	BIG-lncRNA-45.1	chr1	+	65936842-65945173	3	Yes	No
BIG-lncRNA-45	BIG-lncRNA-45.2	chr1	+	65936842-65949751	5	Yes	No
BIG-lncRNA-46	BIG-lncRNA-46.1	chr1	+	70006340-70007517	2	No	No
BIG-lncRNA-47	BIG-lncRNA-47.1	chr1	-	73169066-73178296	3	Yes	Yes
BIG-lncRNA-48	BIG-lncRNA-48.1	chr1	-	75146365-75151376	2	No	No
BIG-lncRNA-49	BIG-lncRNA-49.1	chr1	+	77337698-77354175	4	Yes	No
BIG-lncRNA-49	BIG-lncRNA-49.2	chr1	+	77337724-77354175	4	Yes	No
BIG-lncRNA-50	BIG-lncRNA-50.1	chr1	+	78643133-78644290	2	No	No
BIG-lncRNA-51	BIG-lncRNA-51.1	chr1	+	81729038-81834649	2	No	No
BIG-lncRNA-52	BIG-lncRNA-52.1	chr1	-	83949755-83953836	2	No	No
BIG-lncRNA-53	BIG-lncRNA-53.1	chr1	-	89138457-89149566	4	Yes	Yes
BIG-lncRNA-53	BIG-lncRNA-53.2	chr1	-	89138458-89149566	1	Yes	Yes
BIG-lncRNA-53	BIG-lncRNA-53.3	chr1	-	89149063-89149566	1	Yes	Yes
BIG-lncRNA-54	BIG-lncRNA-54.1	chr1	-	91852783-91853111	1	Yes	Yes
BIG-lncRNA-54	BIG-lncRNA-54.2	chr1	-	91852784-91853007	1	Yes	Yes
BIG-lncRNA-54	BIG-lncRNA-54.3	chr1	-	91852784-91853111	1	Yes	Yes
BIG-lncRNA-54	BIG-lncRNA-54.4	chr1	-	91852806-91853007	1	Yes	Yes
BIG-lncRNA-54	BIG-lncRNA-54.5	chr1	-	91852806-91853111	1	Yes	Yes
BIG-lncRNA-54	BIG-lncRNA-54.6	chr1	-	91852844-91853111	1	Yes	Yes
BIG-lncRNA-55	BIG-lncRNA-55.1	chr1	-	93170451-93175642	2	Yes	No
BIG-lncRNA-56	BIG-lncRNA-56.1	chr1	-	95172955-95186922	4	Yes	Yes
BIG-lncRNA-57	BIG-lncRNA-57.1	chr1	-	95233571-95258212	10	Yes	No
BIG-lncRNA-58	BIG-lncRNA-58.1	chr1	-	95258435-95264109	2	Yes	No
BIG-lncRNA-59	BIG-lncRNA-59.1	chr1	+	106619454-106869158	2	No	No
BIG-lncRNA-60	BIG-lncRNA-60.1	chr1	-	110609296-110610239	2	No	No
BIG-lncRNA-61	BIG-lncRNA-61.1	chr1	-	110850720-110852851	2	No	No
BIG-lncRNA-62	BIG-lncRNA-62.1	chr1	+	116690706-116694664	2	No	No
BIG-lncRNA-63	BIG-lncRNA-63.1	chr1	+	117549846-117551599	2	No	No
BIG-lncRNA-64	BIG-lncRNA-64.1	chr1	+	118199001-118203806	1	Yes	Yes
BIG-lncRNA-64	BIG-lncRNA-64.2	chr1	+	118201628-118203806	1	Yes	Yes
BIG-lncRNA-65	BIG-lncRNA-65.1	chr1	+	121369211-121472377	2	No	No
BIG-lncRNA-66	BIG-lncRNA-66.1	chr1	+	121377035-121387330	3	No	No
BIG-lncRNA-67	BIG-lncRNA-67.1	chr1	+	142575553-142579879	2	No	No
BIG-lncRNA-68	BIG-lncRNA-68.1	chr1	+	142638747-142641209	2	No	No
BIG-lncRNA-69	BIG-lncRNA-69.1	chr1	+	142657463-142658773	2	No	No
BIG-lncRNA-70	BIG-lncRNA-70.1	chr1	-	142661198-142662265	2	No	No
BIG-lncRNA-71	BIG-lncRNA-71.1	chr1	+	142661542-142662290	2	No	No
BIG-lncRNA-72	BIG-lncRNA-72.1	chr1	-	142667760-142669330	2	No	No
BIG-lncRNA-73	BIG-lncRNA-73.1	chr1	-	142675597-142676487	2	No	No
BIG-lncRNA-74	BIG-lncRNA-74.1	chr1	+	142679659-142683782	2	No	No
BIG-lncRNA-75	BIG-lncRNA-75.1	chr1	-	142682159-142686255	2	No	No
BIG-lncRNA-76	BIG-lncRNA-76.1	chr1	-	142824891-142828916	2	No	No
BIG-lncRNA-77	BIG-lncRNA-77.1	chr1	-	142829125-142831207	2	No	No
BIG-lncRNA-78	BIG-lncRNA-78.1	chr1	+	142884880-142886262	4	No	No
BIG-lncRNA-78	BIG-lncRNA-78.2	chr1	+	142884880-142886262	5	No	No
BIG-lncRNA-78	BIG-lncRNA-78.3	chr1	+	142885191-142886262	3	No	No
BIG-lncRNA-79	BIG-lncRNA-79.1	chr1	+	142932459-142934365	2	No	No
BIG-lncRNA-80	BIG-lncRNA-80.1	chr1	+	143648271-143658063	2	No	No
BIG-lncRNA-81	BIG-lncRNA-81.1	chr1	-	143882055-143885172	2	No	No
BIG-lncRNA-82	BIG-lncRNA-82.1	chr1	-	144321241-144502117	2	No	No
BIG-lncRNA-83	BIG-lncRNA-83.1	chr1	-	144330119-144511712	2	No	No
BIG-lncRNA-84	BIG-lncRNA-84.1	chr1	+	145961093-145962160	2	No	No
BIG-lncRNA-85	BIG-lncRNA-85.1	chr1	+	145963240-145965730	2	No	No
BIG-lncRNA-86	BIG-lncRNA-86.1	chr1	-	145997688-145999226	2	No	No
BIG-lncRNA-87	BIG-lncRNA-87.1	chr1	+	147504974-147507464	2	No	No
BIG-lncRNA-88	BIG-lncRNA-88.1	chr1	-	147539316-147541047	2	No	No
BIG-lncRNA-89	BIG-lncRNA-89.1	chr1	-	147637528-147640200	2	No	No
BIG-lncRNA-90	BIG-lncRNA-90.1	chr1	-	148315894-148320954	2	No	No
BIG-lncRNA-91	BIG-lncRNA-91.1	chr1	-	148516676-148522306	3	No	No
BIG-lncRNA-92	BIG-lncRNA-92.1	chr1	+	149194570-149216244	2	Yes	No
BIG-lncRNA-93	BIG-lncRNA-93.1	chr1	+	149572643-149573904	2	No	No
BIG-lncRNA-94	BIG-lncRNA-94.1	chr1	+	149832804-149835884	3	No	No
BIG-lncRNA-95	BIG-lncRNA-95.1	chr1	+	151806695-151808522	2	No	No
BIG-lncRNA-96	BIG-lncRNA-96.1	chr1	+	154531559-154531940	2	Yes	Yes
BIG-lncRNA-96	BIG-lncRNA-96.2	chr1	+	154531559-154531918	2	Yes	Yes
BIG-lncRNA-97	BIG-lncRNA-97.1	chr1	+	154686455-154687137	2	No	No
BIG-lncRNA-98	BIG-lncRNA-98.1	chr1	+	155267370-155275336	2	No	No
BIG-lncRNA-99	BIG-lncRNA-99.1	chr1	+	156870199-156871729	2	No	No
BIG-lncRNA-100	BIG-lncRNA-100.1	chr1	+	159363043-159455788	2	No	No
BIG-lncRNA-101	BIG-lncRNA-101.1	chr1	+	162258523-162259206	2	No	No
BIG-lncRNA-102	BIG-lncRNA-102.1	chr1	+	164669735-164684291	8	Yes	No
BIG-lncRNA-102	BIG-lncRNA-102.2	chr1	+	164669800-164684291	8	Yes	No
BIG-lncRNA-103	BIG-lncRNA-103.1	chr1	+	164690184-164693707	3	Yes	No
BIG-lncRNA-104	BIG-lncRNA-104.1	chr1	+	164693947-164713397	10	Yes	No
BIG-lncRNA-104	BIG-lncRNA-104.2	chr1	+	164693947-164717355	8	Yes	No
BIG-lncRNA-105	BIG-lncRNA-105.1	chr1	+	168409733-168464222	16	Yes	Yes
BIG-lncRNA-105	BIG-lncRNA-105.2	chr1	+	168409733-168464029	9	Yes	Yes
BIG-lncRNA-105	BIG-lncRNA-105.3	chr1	+	168409733-168464029	16	Yes	Yes
BIG-lncRNA-105	BIG-lncRNA-105.4	chr1	+	168409733-168474244	16	Yes	Yes
BIG-lncRNA-105	BIG-lncRNA-105.5	chr1	+	168409733-168464222	20	Yes	Yes
BIG-lncRNA-105	BIG-lncRNA-105.6	chr1	+	168409733-168464029	20	Yes	Yes
BIG-lncRNA-105	BIG-lncRNA-105.7	chr1	+	168409733-168474244	9	Yes	Yes
BIG-lncRNA-105	BIG-lncRNA-105.8	chr1	+	168409733-168464222	9	Yes	Yes
BIG-lncRNA-105	BIG-lncRNA-105.9	chr1	+	168473761-168474244	1	Yes	Yes
BIG-lncRNA-106	BIG-lncRNA-106.1	chr1	+	170725681-170736124	3	No	No
BIG-lncRNA-107	BIG-lncRNA-107.1	chr1	-	172876898-172879038	2	No	No
BIG-lncRNA-108	BIG-lncRNA-108.1	chr1	-	173367837-173372091	2	No	No
BIG-lncRNA-109	BIG-lncRNA-109.1	chr1	-	173392979-173419872	9	Yes	Yes
BIG-lncRNA-110	BIG-lncRNA-110.1	chr1	-	181967429-181998814	2	No	No
BIG-lncRNA-111	BIG-lncRNA-111.1	chr1	+	184062768-184064807	2	No	No
BIG-lncRNA-112	BIG-lncRNA-112.1	chr1	+	185298614-185299698	1	Yes	Yes
BIG-lncRNA-113	BIG-lncRNA-113.1	chr1	+	188157735-188159187	2	No	No
BIG-lncRNA-114	BIG-lncRNA-114.1	chr1	+	200638751-200640955	1	Yes	Yes
BIG-lncRNA-115	BIG-lncRNA-115.1	chr1	+	201316225-201428569	2	No	No
BIG-lncRNA-116	BIG-lncRNA-116.1	chr1	+	205799249-205799966	2	No	No
BIG-lncRNA-117	BIG-lncRNA-117.1	chr1	-	207058756-207064152	2	Yes	No
BIG-lncRNA-118	BIG-lncRNA-118.1	chr1	+	207691752-207692045	2	No	No
BIG-lncRNA-119	BIG-lncRNA-119.1	chr1	-	208015060-208022234	3	Yes	No
BIG-lncRNA-119	BIG-lncRNA-119.2	chr1	-	208015060-208022234	3	Yes	No
BIG-lncRNA-119	BIG-lncRNA-119.3	chr1	-	208015060-208022234	3	Yes	No
BIG-lncRNA-120	BIG-lncRNA-120.1	chr1	-	215583478-215589042	2	No	No
BIG-lncRNA-121	BIG-lncRNA-121.1	chr1	+	219516567-219518409	2	No	No
BIG-lncRNA-122	BIG-lncRNA-122.1	chr1	+	221033937-221043704	2	No	No
BIG-lncRNA-123	BIG-lncRNA-123.1	chr1	+	221565110-221568811	2	No	No
BIG-lncRNA-124	BIG-lncRNA-124.1	chr1	-	222080535-222113010	4	Yes	No
BIG-lncRNA-125	BIG-lncRNA-125.1	chr1	-	222146427-222152299	2	No	No
BIG-lncRNA-126	BIG-lncRNA-126.1	chr1	-	222686466-222686895	2	No	No
BIG-lncRNA-127	BIG-lncRNA-127.1	chr1	+	225233028-225237061	2	No	No
BIG-lncRNA-128	BIG-lncRNA-128.1	chr1	-	226915272-226919802	4	Yes	Yes
BIG-lncRNA-129	BIG-lncRNA-129.1	chr1	+	228164036-228165114	2	No	No
BIG-lncRNA-130	BIG-lncRNA-130.1	chr1	+	233895655-233995363	2	No	No
BIG-lncRNA-131	BIG-lncRNA-131.1	chr1	+	238271192-238272570	2	No	No
BIG-lncRNA-132	BIG-lncRNA-132.1	chr1	+	238357246-238360449	2	No	No
BIG-lncRNA-133	BIG-lncRNA-133.1	chr1	-	238439420-238543186	2	No	No
BIG-lncRNA-134	BIG-lncRNA-134.1	chr1	-	240837523-240838564	2	No	No
BIG-lncRNA-135	BIG-lncRNA-135.1	chr1	+	241597357-241603171	2	No	No
BIG-lncRNA-136	BIG-lncRNA-136.1	chr1	+	242977199-243138756	3	No	No
BIG-lncRNA-137	BIG-lncRNA-137.1	chr1	-	244174425-244204693	2	No	No
BIG-lncRNA-138	BIG-lncRNA-138.1	chr1	+	244649573-244652174	2	No	No
BIG-lncRNA-139	BIG-lncRNA-139.1	chr1	-	246219119-246231586	6	Yes	No
BIG-lncRNA-139	BIG-lncRNA-139.2	chr1	-	246219119-246231586	6	Yes	No
BIG-lncRNA-140	BIG-lncRNA-140.1	chr1	-	246262156-246269783	3	Yes	No
BIG-lncRNA-140	BIG-lncRNA-140.2	chr1	-	246262156-246269811	3	Yes	No
BIG-lncRNA-141	BIG-lncRNA-141.1	chr1	-	246376057-246378414	2	Yes	No
BIG-lncRNA-142	BIG-lncRNA-142.1	chr1	+	248691191-248700740	2	No	No
BIG-lncRNA-143	BIG-lncRNA-143.1	chr1	-	249130680-249132831	2	Yes	Yes
BIG-lncRNA-144	BIG-lncRNA-144.1	chr2	-	407804-605177	2	No	No
BIG-lncRNA-145	BIG-lncRNA-145.1	chr2	+	970517-971139	2	No	No
BIG-lncRNA-146	BIG-lncRNA-146.1	chr2	+	1004759-1005644	2	No	No
BIG-lncRNA-147	BIG-lncRNA-147.1	chr2	+	1014654-1017498	2	No	No
BIG-lncRNA-148	BIG-lncRNA-148.1	chr2	+	1284864-1285868	2	No	No
BIG-lncRNA-149	BIG-lncRNA-149.1	chr2	-	1496355-1497481	2	No	No
BIG-lncRNA-150	BIG-lncRNA-150.1	chr2	+	8190526-8194607	3	No	No
BIG-lncRNA-151	BIG-lncRNA-151.1	chr2	-	8278691-8281211	2	No	No
BIG-lncRNA-152	BIG-lncRNA-152.1	chr2	-	8537136-8540314	2	No	No
BIG-lncRNA-153	BIG-lncRNA-153.1	chr2	-	9698903-9711918	2	No	No
BIG-lncRNA-154	BIG-lncRNA-154.1	chr2	+	10273851-10295422	6	Yes	Yes
BIG-lncRNA-154	BIG-lncRNA-154.2	chr2	+	10273851-10297908	6	Yes	Yes
BIG-lncRNA-155	BIG-lncRNA-155.1	chr2	+	12300753-12302237	3	No	No
BIG-lncRNA-156	BIG-lncRNA-156.1	chr2	+	12417892-12429522	2	Yes	No
BIG-lncRNA-157	BIG-lncRNA-157.1	chr2	+	12451767-12452771	2	No	No
BIG-lncRNA-158	BIG-lncRNA-158.1	chr2	-	17340504-17381163	20	Yes	No
BIG-lncRNA-158	BIG-lncRNA-158.2	chr2	-	17368293-17381163	3	Yes	No
BIG-lncRNA-158	BIG-lncRNA-158.3	chr2	-	17377502-17381163	2	Yes	No
BIG-lncRNA-159	BIG-lncRNA-159.1	chr2	-	17382163-17406130	3	Yes	No
BIG-lncRNA-159	BIG-lncRNA-159.2	chr2	-	17382163-17406130	3	Yes	No
BIG-lncRNA-160	BIG-lncRNA-160.1	chr2	-	17412507-17506996	28	Yes	No
BIG-lncRNA-160	BIG-lncRNA-160.2	chr2	-	17481774-17506996	6	Yes	No
BIG-lncRNA-160	BIG-lncRNA-160.3	chr2	-	17483923-17506996	6	Yes	No
BIG-lncRNA-160	BIG-lncRNA-160.4	chr2	-	17486211-17506996	6	Yes	No
BIG-lncRNA-160	BIG-lncRNA-160.5	chr2	-	17487857-17506996	6	Yes	No
BIG-lncRNA-160	BIG-lncRNA-160.6	chr2	-	17488401-17506996	6	Yes	No
BIG-lncRNA-160	BIG-lncRNA-160.7	chr2	-	17489271-17506996	6	Yes	No
BIG-lncRNA-160	BIG-lncRNA-160.8	chr2	-	17490515-17506996	6	Yes	No
BIG-lncRNA-160	BIG-lncRNA-160.9	chr2	-	17492219-17506996	6	Yes	No
BIG-lncRNA-160	BIG-lncRNA-160.10	chr2	-	17494506-17506996	6	Yes	No
BIG-lncRNA-160	BIG-lncRNA-160.11	chr2	-	17496095-17506996	6	Yes	No
BIG-lncRNA-161	BIG-lncRNA-161.1	chr2	+	18816476-18898282	2	No	No
BIG-lncRNA-162	BIG-lncRNA-162.1	chr2	+	18887942-18903436	3	Yes	No
BIG-lncRNA-162	BIG-lncRNA-162.2	chr2	+	18887942-18902582	7	Yes	No
BIG-lncRNA-163	BIG-lncRNA-163.1	chr2	+	19141039-19144018	2	No	No
BIG-lncRNA-164	BIG-lncRNA-164.1	chr2	-	27799617-27802013	2	No	Yes
BIG-lncRNA-165	BIG-lncRNA-165.1	chr2	+	29439135-29440235	2	No	No
BIG-lncRNA-166	BIG-lncRNA-166.1	chr2	-	31505049-31510335	3	No	No
BIG-lncRNA-167	BIG-lncRNA-167.1	chr2	+	33855802-34000623	2	No	No
BIG-lncRNA-168	BIG-lncRNA-168.1	chr2	+	35523314-35595075	2	No	No
BIG-lncRNA-169	BIG-lncRNA-169.1	chr2	+	37863074-37875421	3	Yes	No
BIG-lncRNA-169	BIG-lncRNA-169.2	chr2	+	37863122-37875421	3	Yes	No
BIG-lncRNA-169	BIG-lncRNA-169.3	chr2	+	37863208-37875421	3	Yes	No
BIG-lncRNA-169	BIG-lncRNA-169.4	chr2	+	37863559-37875421	3	Yes	No
BIG-lncRNA-170	BIG-lncRNA-170.1	chr2	-	38002866-38008254	2	No	No
BIG-lncRNA-171	BIG-lncRNA-171.1	chr2	-	38081894-38083309	3	No	No
BIG-lncRNA-172	BIG-lncRNA-172.1	chr2	+	38113248-38134958	2	No	No
BIG-lncRNA-173	BIG-lncRNA-173.1	chr2	+	38402055-38406658	2	Yes	No
BIG-lncRNA-174	BIG-lncRNA-174.1	chr2	-	38673036-38674613	2	No	No
BIG-lncRNA-175	BIG-lncRNA-175.1	chr2	-	40523255-40548789	11	Yes	No
BIG-lncRNA-175	BIG-lncRNA-175.2	chr2	-	40534096-40548789	3	Yes	No
BIG-lncRNA-176	BIG-lncRNA-176.1	chr2	-	40616037-40628706	3	Yes	No
BIG-lncRNA-176	BIG-lncRNA-176.2	chr2	-	40616037-40628784	3	Yes	No
BIG-lncRNA-176	BIG-lncRNA-176.3	chr2	-	40616037-40623887	4	Yes	No
BIG-lncRNA-176	BIG-lncRNA-176.4	chr2	-	40616037-40623887	4	Yes	No
BIG-lncRNA-176	BIG-lncRNA-176.5	chr2	-	40616037-40623887	4	Yes	No
BIG-lncRNA-176	BIG-lncRNA-176.6	chr2	-	40616037-40623887	3	Yes	No
BIG-lncRNA-176	BIG-lncRNA-176.7	chr2	-	40616037-40628706	4	Yes	No
BIG-lncRNA-176	BIG-lncRNA-176.8	chr2	-	40623958-40628784	2	Yes	No
BIG-lncRNA-176	BIG-lncRNA-176.9	chr2	-	40623958-40628706	2	Yes	No
BIG-lncRNA-176	BIG-lncRNA-176.10	chr2	-	40625772-40628706	2	Yes	No
BIG-lncRNA-177	BIG-lncRNA-177.1	chr2	-	42229243-42240820	3	Yes	No
BIG-lncRNA-178	BIG-lncRNA-178.1	chr2	-	42319643-42320558	2	No	No
BIG-lncRNA-179	BIG-lncRNA-179.1	chr2	-	47104862-47106468	2	No	No
BIG-lncRNA-180	BIG-lncRNA-180.1	chr2	+	47323263-47334441	2	No	No
BIG-lncRNA-181	BIG-lncRNA-181.1	chr2	+	48274501-48319104	2	Yes	No
BIG-lncRNA-182	BIG-lncRNA-182.1	chr2	-	48941439-48943800	2	No	No
BIG-lncRNA-183	BIG-lncRNA-183.1	chr2	+	55278636-55279536	1	Yes	Yes
BIG-lncRNA-184	BIG-lncRNA-184.1	chr2	+	57421576-57457607	2	No	No
BIG-lncRNA-185	BIG-lncRNA-185.1	chr2	-	58444389-58446274	2	Yes	Yes
BIG-lncRNA-186	BIG-lncRNA-186.1	chr2	+	58541481-58546519	2	No	No
BIG-lncRNA-187	BIG-lncRNA-187.1	chr2	-	58842267-58847428	2	No	No
BIG-lncRNA-188	BIG-lncRNA-188.1	chr2	+	60696103-60697601	2	No	No
BIG-lncRNA-189	BIG-lncRNA-189.1	chr2	+	60698501-60701668	3	No	No
BIG-lncRNA-190	BIG-lncRNA-190.1	chr2	+	62552432-62554354	2	No	No
BIG-lncRNA-191	BIG-lncRNA-191.1	chr2	+	62600697-62665240	2	No	No
BIG-lncRNA-192	BIG-lncRNA-192.1	chr2	+	64381611-64386674	2	No	No
BIG-lncRNA-193	BIG-lncRNA-193.1	chr2	+	64514822-64520484	2	No	No
BIG-lncRNA-194	BIG-lncRNA-194.1	chr2	-	64854834-64856516	2	No	No
BIG-lncRNA-195	BIG-lncRNA-195.1	chr2	+	64881204-64882347	1	Yes	Yes
BIG-lncRNA-196	BIG-lncRNA-196.1	chr2	-	66615113-66616183	2	No	No
BIG-lncRNA-197	BIG-lncRNA-197.1	chr2	-	68902946-68988087	2	No	No
BIG-lncRNA-198	BIG-lncRNA-198.1	chr2	-	69238678-69240100	2	No	No
BIG-lncRNA-199	BIG-lncRNA-199.1	chr2	-	70240347-70241927	1	Yes	Yes
BIG-lncRNA-200	BIG-lncRNA-200.1	chr2	+	71133678-71135773	1	Yes	Yes
BIG-lncRNA-200	BIG-lncRNA-200.2	chr2	+	71134480-71135773	1	Yes	Yes
BIG-lncRNA-201	BIG-lncRNA-201.1	chr2	+	75251835-75333327	3	No	No
BIG-lncRNA-202	BIG-lncRNA-202.1	chr2	-	76800822-76806830	2	No	No
BIG-lncRNA-203	BIG-lncRNA-203.1	chr2	-	78455973-78460567	2	No	No
BIG-lncRNA-204	BIG-lncRNA-204.1	chr2	-	78648088-78649960	2	No	No
BIG-lncRNA-205	BIG-lncRNA-205.1	chr2	-	78697664-78700061	2	No	No
BIG-lncRNA-206	BIG-lncRNA-206.1	chr2	-	78737239-78762138	9	Yes	Yes
BIG-lncRNA-206	BIG-lncRNA-206.2	chr2	-	78737239-78762138	6	Yes	Yes
BIG-lncRNA-206	BIG-lncRNA-206.3	chr2	-	78737239-78762138	12	Yes	Yes
BIG-lncRNA-207	BIG-lncRNA-207.1	chr2	+	80209474-80210271	2	No	No
BIG-lncRNA-208	BIG-lncRNA-208.1	chr2	+	80721435-80725129	2	No	No
BIG-lncRNA-209	BIG-lncRNA-209.1	chr2	-	87666431-87745527	2	No	No
BIG-lncRNA-210	BIG-lncRNA-210.1	chr2	-	87739042-87749896	2	No	No
BIG-lncRNA-211	BIG-lncRNA-211.1	chr2	+	87756125-87769340	7	Yes	No
BIG-lncRNA-212	BIG-lncRNA-212.1	chr2	-	89898970-89900649	2	No	No
BIG-lncRNA-213	BIG-lncRNA-213.1	chr2	-	92008501-92219185	2	No	No
BIG-lncRNA-214	BIG-lncRNA-214.1	chr2	-	92272773-92275316	2	No	No
BIG-lncRNA-215	BIG-lncRNA-215.1	chr2	-	92274552-92291576	2	No	No
BIG-lncRNA-216	BIG-lncRNA-216.1	chr2	-	92274869-92299559	4	No	No
BIG-lncRNA-217	BIG-lncRNA-217.1	chr2	-	92277059-92280821	2	No	No
BIG-lncRNA-218	BIG-lncRNA-218.1	chr2	-	92279888-92323555	2	No	No
BIG-lncRNA-219	BIG-lncRNA-219.1	chr2	-	92285969-92292353	2	No	No
BIG-lncRNA-220	BIG-lncRNA-220.1	chr2	-	92297674-92314411	2	No	No
BIG-lncRNA-221	BIG-lncRNA-221.1	chr2	+	95553720-95572629	2	No	No
BIG-lncRNA-222	BIG-lncRNA-222.1	chr2	+	96308539-96314670	2	No	No
BIG-lncRNA-223	BIG-lncRNA-223.1	chr2	-	96548471-96591815	2	No	No
BIG-lncRNA-224	BIG-lncRNA-224.1	chr2	+	97071096-97153070	2	No	No
BIG-lncRNA-225	BIG-lncRNA-225.1	chr2	-	98183571-98184507	2	No	No
BIG-lncRNA-226	BIG-lncRNA-226.1	chr2	+	103437177-103437926	2	No	No
BIG-lncRNA-227	BIG-lncRNA-227.1	chr2	+	106996724-106998099	2	No	No
BIG-lncRNA-228	BIG-lncRNA-228.1	chr2	-	108504817-108506918	2	No	No
BIG-lncRNA-229	BIG-lncRNA-229.1	chr2	+	109551223-109600818	2	No	No
BIG-lncRNA-230	BIG-lncRNA-230.1	chr2	-	110516305-110517906	2	No	No
BIG-lncRNA-231	BIG-lncRNA-231.1	chr2	+	110717855-110719403	2	No	No
BIG-lncRNA-232	BIG-lncRNA-232.1	chr2	-	112514740-112516927	2	No	No
BIG-lncRNA-233	BIG-lncRNA-233.1	chr2	-	113104302-113104738	2	No	No
BIG-lncRNA-234	BIG-lncRNA-234.1	chr2	-	113433450-113439350	2	No	No
BIG-lncRNA-235	BIG-lncRNA-235.1	chr2	+	114100113-114101310	2	No	No
BIG-lncRNA-236	BIG-lncRNA-236.1	chr2	-	127027057-127028558	2	No	No
BIG-lncRNA-237	BIG-lncRNA-237.1	chr2	+	127907592-127935747	2	No	No
BIG-lncRNA-238	BIG-lncRNA-238.1	chr2	-	128143341-128144805	1	Yes	Yes
BIG-lncRNA-238	BIG-lncRNA-238.2	chr2	-	128143341-128144598	1	Yes	Yes
BIG-lncRNA-239	BIG-lncRNA-239.1	chr2	-	130799338-130801456	2	No	No
BIG-lncRNA-240	BIG-lncRNA-240.1	chr2	-	131046615-131047452	2	No	No
BIG-lncRNA-241	BIG-lncRNA-241.1	chr2	-	131148026-131149423	2	No	No
BIG-lncRNA-242	BIG-lncRNA-242.1	chr2	+	131239009-131240501	2	No	No
BIG-lncRNA-243	BIG-lncRNA-243.1	chr2	+	131255853-131258146	2	No	No
BIG-lncRNA-244	BIG-lncRNA-244.1	chr2	-	131380930-131396830	2	No	No
BIG-lncRNA-245	BIG-lncRNA-245.1	chr2	+	131421181-131424642	2	No	No
BIG-lncRNA-246	BIG-lncRNA-246.1	chr2	+	132516118-132518780	2	No	No
BIG-lncRNA-247	BIG-lncRNA-247.1	chr2	-	132827060-132834398	2	No	No
BIG-lncRNA-248	BIG-lncRNA-248.1	chr2	+	132827387-132834533	2	No	No
BIG-lncRNA-249	BIG-lncRNA-249.1	chr2	-	132828551-132829725	2	No	No
BIG-lncRNA-250	BIG-lncRNA-250.1	chr2	-	132828862-132834817	2	No	No
BIG-lncRNA-251	BIG-lncRNA-251.1	chr2	-	132829023-132833297	2	No	No
BIG-lncRNA-252	BIG-lncRNA-252.1	chr2	-	132976439-132982819	2	No	No
BIG-lncRNA-253	BIG-lncRNA-253.1	chr2	-	132980445-132983031	2	No	No
BIG-lncRNA-254	BIG-lncRNA-254.1	chr2	-	134434642-134441834	3	Yes	No
BIG-lncRNA-255	BIG-lncRNA-255.1	chr2	-	142216668-142217524	2	No	No
BIG-lncRNA-256	BIG-lncRNA-256.1	chr2	-	142431323-142456061	3	Yes	No
BIG-lncRNA-257	BIG-lncRNA-257.1	chr2	-	142496513-142566097	2	No	No
BIG-lncRNA-258	BIG-lncRNA-258.1	chr2	+	144020129-144024945	2	Yes	No
BIG-lncRNA-258	BIG-lncRNA-258.2	chr2	+	144020129-144024945	2	Yes	No
BIG-lncRNA-258	BIG-lncRNA-258.3	chr2	+	144021514-144024945	2	Yes	No
BIG-lncRNA-258	BIG-lncRNA-258.4	chr2	+	144021514-144024945	2	Yes	No
BIG-lncRNA-259	BIG-lncRNA-259.1	chr2	+	144041185-144069849	14	Yes	No
BIG-lncRNA-259	BIG-lncRNA-259.2	chr2	+	144041185-144070922	12	Yes	No
BIG-lncRNA-260	BIG-lncRNA-260.1	chr2	+	144139564-144152449	2	Yes	No
BIG-lncRNA-261	BIG-lncRNA-261.1	chr2	-	147141083-147143637	2	No	No
BIG-lncRNA-262	BIG-lncRNA-262.1	chr2	-	147239871-147243451	3	No	No
BIG-lncRNA-263	BIG-lncRNA-263.1	chr2	-	147253327-147259218	2	No	No
BIG-lncRNA-264	BIG-lncRNA-264.1	chr2	-	148382867-148388231	3	Yes	No
BIG-lncRNA-264	BIG-lncRNA-264.2	chr2	-	148382867-148388188	3	Yes	No
BIG-lncRNA-264	BIG-lncRNA-264.3	chr2	-	148382867-148388274	3	Yes	No
BIG-lncRNA-265	BIG-lncRNA-265.1	chr2	+	149282871-149294460	2	No	No
BIG-lncRNA-266	BIG-lncRNA-266.1	chr2	+	150756677-150759661	2	No	No
BIG-lncRNA-267	BIG-lncRNA-267.1	chr2	-	153989550-154079293	2	No	No
BIG-lncRNA-268	BIG-lncRNA-268.1	chr2	+	154279899-154280791	2	No	No
BIG-lncRNA-269	BIG-lncRNA-269.1	chr2	+	155478622-155481061	2	No	No
BIG-lncRNA-270	BIG-lncRNA-270.1	chr2	+	155496256-155499700	2	No	No
BIG-lncRNA-271	BIG-lncRNA-271.1	chr2	-	157035721-157039291	2	No	No
BIG-lncRNA-272	BIG-lncRNA-272.1	chr2	-	157076085-157077767	2	No	No
BIG-lncRNA-273	BIG-lncRNA-273.1	chr2	+	157256224-157280377	3	No	No
BIG-lncRNA-274	BIG-lncRNA-274.1	chr2	+	164942905-164955308	2	No	No
BIG-lncRNA-275	BIG-lncRNA-275.1	chr2	-	173013314-173061526	2	Yes	No
BIG-lncRNA-276	BIG-lncRNA-276.1	chr2	-	173938341-173939497	1	Yes	Yes
BIG-lncRNA-276	BIG-lncRNA-276.2	chr2	-	173938341-173941142	1	Yes	Yes
BIG-lncRNA-277	BIG-lncRNA-277.1	chr2	+	176722402-176724339	2	No	No
BIG-lncRNA-278	BIG-lncRNA-278.1	chr2	+	177510145-177513050	2	No	No
BIG-lncRNA-279	BIG-lncRNA-279.1	chr2	+	181769264-181771247	2	No	No
BIG-lncRNA-280	BIG-lncRNA-280.1	chr2	+	181873651-181882781	7	Yes	No
BIG-lncRNA-281	BIG-lncRNA-281.1	chr2	+	184056427-184072258	4	Yes	No
BIG-lncRNA-281	BIG-lncRNA-281.2	chr2	+	184056427-184061377	2	Yes	No
BIG-lncRNA-282	BIG-lncRNA-282.1	chr2	+	186879636-187057182	2	No	No
BIG-lncRNA-283	BIG-lncRNA-283.1	chr2	-	187104591-187105193	2	No	No
BIG-lncRNA-284	BIG-lncRNA-284.1	chr2	-	187305225-187317285	7	Yes	No
BIG-lncRNA-284	BIG-lncRNA-284.2	chr2	-	187305225-187317285	7	Yes	No
BIG-lncRNA-284	BIG-lncRNA-284.3	chr2	-	187305225-187317285	4	Yes	No
BIG-lncRNA-285	BIG-lncRNA-285.1	chr2	-	191402644-191503412	2	No	No
BIG-lncRNA-286	BIG-lncRNA-286.1	chr2	+	192712172-192716116	2	Yes	No
BIG-lncRNA-287	BIG-lncRNA-287.1	chr2	-	193590577-193683669	3	No	No
BIG-lncRNA-288	BIG-lncRNA-288.1	chr2	+	196603137-196605629	2	No	No
BIG-lncRNA-289	BIG-lncRNA-289.1	chr2	+	198804464-198806876	2	Yes	No
BIG-lncRNA-290	BIG-lncRNA-290.1	chr2	+	200050167-200117406	2	No	No
BIG-lncRNA-291	BIG-lncRNA-291.1	chr2	-	201129232-201143554	5	No	Yes
BIG-lncRNA-292	BIG-lncRNA-292.1	chr2	+	205577897-205579157	2	No	No
BIG-lncRNA-293	BIG-lncRNA-293.1	chr2	-	208022003-208028998	7	Yes	No
BIG-lncRNA-293	BIG-lncRNA-293.2	chr2	-	208022003-208029955	7	Yes	No
BIG-lncRNA-293	BIG-lncRNA-293.3	chr2	-	208022003-208028998	6	Yes	No
BIG-lncRNA-293	BIG-lncRNA-293.4	chr2	-	208022003-208029955	6	Yes	No
BIG-lncRNA-293	BIG-lncRNA-293.5	chr2	-	208022003-208029955	5	Yes	No
BIG-lncRNA-293	BIG-lncRNA-293.6	chr2	-	208022648-208029955	3	Yes	No
BIG-lncRNA-293	BIG-lncRNA-293.7	chr2	-	208022648-208028998	3	Yes	No
BIG-lncRNA-293	BIG-lncRNA-293.8	chr2	-	208023376-208029955	3	Yes	No
BIG-lncRNA-293	BIG-lncRNA-293.9	chr2	-	208023376-208028998	3	Yes	No
BIG-lncRNA-294	BIG-lncRNA-294.1	chr2	-	213031388-213079063	2	No	No
BIG-lncRNA-295	BIG-lncRNA-295.1	chr2	-	213162468-213315543	2	Yes	No
BIG-lncRNA-296	BIG-lncRNA-296.1	chr2	-	213361913-213363470	2	No	No
BIG-lncRNA-297	BIG-lncRNA-297.1	chr2	-	213759776-213760866	2	No	No
BIG-lncRNA-298	BIG-lncRNA-298.1	chr2	-	214096498-214098615	2	No	No
BIG-lncRNA-299	BIG-lncRNA-299.1	chr2	+	216226287-216226549	1	Yes	Yes
BIG-lncRNA-300	BIG-lncRNA-300.1	chr2	-	222771869-222774188	2	No	Yes
BIG-lncRNA-301	BIG-lncRNA-301.1	chr2	+	223659717-223661722	2	No	No
BIG-lncRNA-302	BIG-lncRNA-302.1	chr2	-	225285322-225287341	2	No	No
BIG-lncRNA-303	BIG-lncRNA-303.1	chr2	-	225890392-225906166	3	Yes	No
BIG-lncRNA-303	BIG-lncRNA-303.2	chr2	-	225900391-225906166	2	Yes	No
BIG-lncRNA-303	BIG-lncRNA-303.3	chr2	-	225903130-225906166	2	Yes	No
BIG-lncRNA-304	BIG-lncRNA-304.1	chr2	-	226823943-226904498	11	Yes	No
BIG-lncRNA-305	BIG-lncRNA-305.1	chr2	-	230045515-230045872	2	No	Yes
BIG-lncRNA-305	BIG-lncRNA-305.2	chr2	-	230045563-230045872	2	No	Yes
BIG-lncRNA-305	BIG-lncRNA-305.3	chr2	-	230045586-230045872	2	No	Yes
BIG-lncRNA-306	BIG-lncRNA-306.1	chr2	-	237933242-237935211	2	No	No
BIG-lncRNA-307	BIG-lncRNA-307.1	chr2	+	238029818-238030883	2	No	No
BIG-lncRNA-308	BIG-lncRNA-308.1	chr2	+	239840765-239842903	2	No	No
BIG-lncRNA-309	BIG-lncRNA-309.1	chr2	-	240260216-240302732	9	Yes	Yes
BIG-lncRNA-310	BIG-lncRNA-310.1	chr2	+	240640722-240641616	2	No	No
BIG-lncRNA-311	BIG-lncRNA-311.1	chr2	-	240744842-240850827	2	Yes	No
BIG-lncRNA-312	BIG-lncRNA-312.1	chr2	+	241248137-241248569	2	No	No
BIG-lncRNA-313	BIG-lncRNA-313.1	chr2	+	243040899-243054616	2	Yes	No
BIG-lncRNA-314	BIG-lncRNA-314.1	chr3	+	972600-1069553	3	No	No
BIG-lncRNA-315	BIG-lncRNA-315.1	chr3	-	999378-1000961	2	No	No
BIG-lncRNA-316	BIG-lncRNA-316.1	chr3	-	4105720-4107772	2	No	No
BIG-lncRNA-317	BIG-lncRNA-317.1	chr3	-	5280899-5281363	2	No	No
BIG-lncRNA-318	BIG-lncRNA-318.1	chr3	+	6553113-6570426	3	Yes	No
BIG-lncRNA-319	BIG-lncRNA-319.1	chr3	+	7201405-7202707	2	No	No
BIG-lncRNA-320	BIG-lncRNA-320.1	chr3	-	8242429-8360028	2	No	No
BIG-lncRNA-321	BIG-lncRNA-321.1	chr3	-	13053130-13057843	3	Yes	No
BIG-lncRNA-321	BIG-lncRNA-321.2	chr3	-	13053130-13056804	2	Yes	No
BIG-lncRNA-321	BIG-lncRNA-321.3	chr3	-	13053130-13057155	2	Yes	No
BIG-lncRNA-321	BIG-lncRNA-321.4	chr3	-	13053130-13056804	3	Yes	No
BIG-lncRNA-322	BIG-lncRNA-322.1	chr3	-	13174386-13176131	2	No	No
BIG-lncRNA-323	BIG-lncRNA-323.1	chr3	-	16167891-16169479	2	No	No
BIG-lncRNA-324	BIG-lncRNA-324.1	chr3	+	18178617-18217476	5	Yes	No
BIG-lncRNA-325	BIG-lncRNA-325.1	chr3	+	18244867-18248853	2	Yes	Yes
BIG-lncRNA-325	BIG-lncRNA-325.2	chr3	+	18244868-18248853	1	Yes	Yes
BIG-lncRNA-326	BIG-lncRNA-326.1	chr3	+	23381206-23388267	2	No	Yes
BIG-lncRNA-326	BIG-lncRNA-326.2	chr3	+	23381806-23388267	3	No	Yes
BIG-lncRNA-327	BIG-lncRNA-327.1	chr3	-	28047213-28049857	1	Yes	Yes
BIG-lncRNA-327	BIG-lncRNA-327.2	chr3	-	28047214-28049857	1	Yes	Yes
BIG-lncRNA-328	BIG-lncRNA-328.1	chr3	-	28156397-28157247	2	No	No
BIG-lncRNA-329	BIG-lncRNA-329.1	chr3	-	30382620-30383893	2	No	No
BIG-lncRNA-330	BIG-lncRNA-330.1	chr3	-	33125274-33126765	1	Yes	Yes
BIG-lncRNA-331	BIG-lncRNA-331.1	chr3	+	34329036-34331160	2	No	No
BIG-lncRNA-332	BIG-lncRNA-332.1	chr3	-	38117103-38117426	2	No	No
BIG-lncRNA-333	BIG-lncRNA-333.1	chr3	-	38117920-38125221	2	No	No
BIG-lncRNA-334	BIG-lncRNA-334.1	chr3	+	38331069-38338762	2	No	No
BIG-lncRNA-335	BIG-lncRNA-335.1	chr3	-	40276544-40341637	9	Yes	No
BIG-lncRNA-336	BIG-lncRNA-336.1	chr3	-	40423564-40425905	2	No	No
BIG-lncRNA-337	BIG-lncRNA-337.1	chr3	+	42922571-42925544	2	No	No
BIG-lncRNA-338	BIG-lncRNA-338.1	chr3	+	43079815-43118354	3	No	No
BIG-lncRNA-339	BIG-lncRNA-339.1	chr3	-	53838587-53841316	2	No	No
BIG-lncRNA-340	BIG-lncRNA-340.1	chr3	+	53926090-53926447	1	Yes	Yes
BIG-lncRNA-341	BIG-lncRNA-341.1	chr3	+	54205186-54237486	4	Yes	No
BIG-lncRNA-342	BIG-lncRNA-342.1	chr3	-	58716858-58718913	2	No	No
BIG-lncRNA-343	BIG-lncRNA-343.1	chr3	-	60290530-60294013	2	No	No
BIG-lncRNA-344	BIG-lncRNA-344.1	chr3	-	60356180-60376128	5	Yes	No
BIG-lncRNA-345	BIG-lncRNA-345.1	chr3	-	60404218-60413701	2	No	No
BIG-lncRNA-346	BIG-lncRNA-346.1	chr3	-	65734300-65736349	2	No	No
BIG-lncRNA-347	BIG-lncRNA-347.1	chr3	-	65774776-65775708	2	No	No
BIG-lncRNA-348	BIG-lncRNA-348.1	chr3	-	65787704-65841444	13	Yes	No
BIG-lncRNA-349	BIG-lncRNA-349.1	chr3	-	65995867-66009989	5	Yes	No
BIG-lncRNA-349	BIG-lncRNA-349.2	chr3	-	66002080-66009989	5	Yes	No
BIG-lncRNA-350	BIG-lncRNA-350.1	chr3	-	69404616-69469440	4	Yes	No
BIG-lncRNA-350	BIG-lncRNA-350.2	chr3	-	69418210-69469440	4	Yes	No
BIG-lncRNA-351	BIG-lncRNA-351.1	chr3	-	71628949-71629264	1	Yes	Yes
BIG-lncRNA-352	BIG-lncRNA-352.1	chr3	+	71974652-72077873	2	No	No
BIG-lncRNA-353	BIG-lncRNA-353.1	chr3	-	72066205-72069370	2	No	No
BIG-lncRNA-354	BIG-lncRNA-354.1	chr3	-	72462514-72491801	6	Yes	No
BIG-lncRNA-354	BIG-lncRNA-354.2	chr3	-	72463829-72491801	11	Yes	No
BIG-lncRNA-354	BIG-lncRNA-354.3	chr3	-	72463829-72489509	11	Yes	No
BIG-lncRNA-354	BIG-lncRNA-354.4	chr3	-	72465709-72491801	11	Yes	No
BIG-lncRNA-354	BIG-lncRNA-354.5	chr3	-	72465709-72489509	11	Yes	No
BIG-lncRNA-354	BIG-lncRNA-354.6	chr3	-	72467806-72491801	4	Yes	No
BIG-lncRNA-354	BIG-lncRNA-354.7	chr3	-	72467806-72489509	4	Yes	No
BIG-lncRNA-354	BIG-lncRNA-354.8	chr3	-	72477865-72489509	6	Yes	No
BIG-lncRNA-354	BIG-lncRNA-354.9	chr3	-	72477865-72491801	7	Yes	No
BIG-lncRNA-354	BIG-lncRNA-354.10	chr3	-	72478063-72491801	4	Yes	No
BIG-lncRNA-354	BIG-lncRNA-354.11	chr3	-	72478063-72489509	4	Yes	No
BIG-lncRNA-354	BIG-lncRNA-354.12	chr3	-	72481241-72489509	6	Yes	No
BIG-lncRNA-354	BIG-lncRNA-354.13	chr3	-	72481241-72495592	8	Yes	No
BIG-lncRNA-354	BIG-lncRNA-354.14	chr3	-	72481241-72489509	4	Yes	No
BIG-lncRNA-354	BIG-lncRNA-354.15	chr3	-	72481241-72491801	4	Yes	No
BIG-lncRNA-354	BIG-lncRNA-354.16	chr3	-	72481241-72491801	6	Yes	No
BIG-lncRNA-354	BIG-lncRNA-354.17	chr3	-	72481720-72495592	8	Yes	No
BIG-lncRNA-354	BIG-lncRNA-354.18	chr3	-	72481720-72489509	6	Yes	No
BIG-lncRNA-354	BIG-lncRNA-354.19	chr3	-	72481720-72491801	6	Yes	No
BIG-lncRNA-354	BIG-lncRNA-354.20	chr3	-	72482607-72491801	6	Yes	No
BIG-lncRNA-354	BIG-lncRNA-354.21	chr3	-	72482607-72495592	8	Yes	No
BIG-lncRNA-354	BIG-lncRNA-354.22	chr3	-	72482607-72489509	6	Yes	No
BIG-lncRNA-355	BIG-lncRNA-355.1	chr3	-	73572554-73589237	16	Yes	Yes
BIG-lncRNA-356	BIG-lncRNA-356.1	chr3	+	75033702-75034231	2	No	No
BIG-lncRNA-357	BIG-lncRNA-357.1	chr3	+	76016763-76018260	2	No	No
BIG-lncRNA-358	BIG-lncRNA-358.1	chr3	-	84547657-84785740	2	No	No
BIG-lncRNA-359	BIG-lncRNA-359.1	chr3	+	85009634-85019140	2	No	No
BIG-lncRNA-360	BIG-lncRNA-360.1	chr3	-	85550184-85574337	2	No	No
BIG-lncRNA-361	BIG-lncRNA-361.1	chr3	-	85552467-85553594	1	Yes	Yes
BIG-lncRNA-362	BIG-lncRNA-362.1	chr3	+	87914105-87963927	2	No	No
BIG-lncRNA-363	BIG-lncRNA-363.1	chr3	+	88557860-88558233	2	No	No
BIG-lncRNA-364	BIG-lncRNA-364.1	chr3	-	95006041-95006813	2	No	No
BIG-lncRNA-365	BIG-lncRNA-365.1	chr3	+	96710386-96721035	5	No	Yes
BIG-lncRNA-365	BIG-lncRNA-365.2	chr3	+	96710386-96720885	5	No	Yes
BIG-lncRNA-366	BIG-lncRNA-366.1	chr3	+	100129021-100131807	2	No	No
BIG-lncRNA-367	BIG-lncRNA-367.1	chr3	-	105549932-105564221	11	Yes	No
BIG-lncRNA-368	BIG-lncRNA-368.1	chr3	-	106438594-106441349	2	No	No
BIG-lncRNA-369	BIG-lncRNA-369.1	chr3	-	107643730-107647319	2	No	No
BIG-lncRNA-370	BIG-lncRNA-370.1	chr3	-	110527352-110559843	4	Yes	No
BIG-lncRNA-371	BIG-lncRNA-371.1	chr3	+	112118658-112120625	2	No	No
BIG-lncRNA-372	BIG-lncRNA-372.1	chr3	+	112306971-112313278	3	No	Yes
BIG-lncRNA-373	BIG-lncRNA-373.1	chr3	+	112497976-112501160	2	Yes	No
BIG-lncRNA-374	BIG-lncRNA-374.1	chr3	+	112743474-112764677	2	No	No
BIG-lncRNA-375	BIG-lncRNA-375.1	chr3	-	114157770-114169046	4	Yes	No
BIG-lncRNA-375	BIG-lncRNA-375.2	chr3	-	114157770-114168529	4	Yes	No
BIG-lncRNA-375	BIG-lncRNA-375.3	chr3	-	114157770-114168989	4	Yes	No
BIG-lncRNA-375	BIG-lncRNA-375.4	chr3	-	114157770-114169026	4	Yes	No
BIG-lncRNA-375	BIG-lncRNA-375.5	chr3	-	114157770-114170051	4	Yes	No
BIG-lncRNA-375	BIG-lncRNA-375.6	chr3	-	114157770-114168971	4	Yes	No
BIG-lncRNA-375	BIG-lncRNA-375.7	chr3	-	114159395-114168529	4	Yes	No
BIG-lncRNA-375	BIG-lncRNA-375.8	chr3	-	114160657-114168529	4	Yes	No
BIG-lncRNA-375	BIG-lncRNA-375.9	chr3	-	114161335-114168529	4	Yes	No
BIG-lncRNA-376	BIG-lncRNA-376.1	chr3	-	114176450-114187856	4	Yes	No
BIG-lncRNA-376	BIG-lncRNA-376.2	chr3	-	114176450-114187856	5	Yes	No
BIG-lncRNA-377	BIG-lncRNA-377.1	chr3	-	114344095-114370396	19	Yes	No
BIG-lncRNA-377	BIG-lncRNA-377.2	chr3	-	114350817-114370396	12	Yes	No
BIG-lncRNA-378	BIG-lncRNA-378.1	chr3	-	114721274-114722388	2	No	No
BIG-lncRNA-379	BIG-lncRNA-379.1	chr3	-	114791495-114804020	4	Yes	No
BIG-lncRNA-379	BIG-lncRNA-379.2	chr3	-	114791495-114804166	4	Yes	No
BIG-lncRNA-379	BIG-lncRNA-379.3	chr3	-	114792694-114804166	7	Yes	No
BIG-lncRNA-379	BIG-lncRNA-379.4	chr3	-	114792694-114804020	7	Yes	No
BIG-lncRNA-379	BIG-lncRNA-379.5	chr3	-	114792694-114804166	7	Yes	No
BIG-lncRNA-379	BIG-lncRNA-379.6	chr3	-	114792694-114804020	7	Yes	No
BIG-lncRNA-380	BIG-lncRNA-380.1	chr3	+	115266673-115279704	6	Yes	No
BIG-lncRNA-381	BIG-lncRNA-381.1	chr3	+	115292802-115321561	13	Yes	No
BIG-lncRNA-382	BIG-lncRNA-382.1	chr3	+	115324107-115337195	4	Yes	No
BIG-lncRNA-383	BIG-lncRNA-383.1	chr3	+	115719436-115741729	8	Yes	No
BIG-lncRNA-384	BIG-lncRNA-384.1	chr3	-	115871034-115977059	2	No	No
BIG-lncRNA-385	BIG-lncRNA-385.1	chr3	-	117561841-117584080	2	No	No
BIG-lncRNA-386	BIG-lncRNA-386.1	chr3	-	120022709-120026710	2	No	Yes
BIG-lncRNA-386	BIG-lncRNA-386.2	chr3	-	120022709-120023911	1	Yes	Yes
BIG-lncRNA-386	BIG-lncRNA-386.3	chr3	-	120022968-120026710	2	No	Yes
BIG-lncRNA-386	BIG-lncRNA-386.4	chr3	-	120022968-120023911	1	Yes	Yes
BIG-lncRNA-387	BIG-lncRNA-387.1	chr3	-	121122838-121131478	2	No	No
BIG-lncRNA-388	BIG-lncRNA-388.1	chr3	-	124471756-124475019	2	No	No
BIG-lncRNA-389	BIG-lncRNA-389.1	chr3	+	125094270-125095521	2	Yes	No
BIG-lncRNA-390	BIG-lncRNA-390.1	chr3	+	128298274-128299548	2	No	No
BIG-lncRNA-391	BIG-lncRNA-391.1	chr3	-	128324472-128326593	2	No	No
BIG-lncRNA-392	BIG-lncRNA-392.1	chr3	-	130611959-130612765	1	Yes	Yes
BIG-lncRNA-393	BIG-lncRNA-393.1	chr3	-	134381806-134382708	2	No	No
BIG-lncRNA-394	BIG-lncRNA-394.1	chr3	-	135078386-135087004	2	No	No
BIG-lncRNA-395	BIG-lncRNA-395.1	chr3	+	136796069-136858502	2	No	No
BIG-lncRNA-396	BIG-lncRNA-396.1	chr3	-	139034533-139059874	2	No	No
BIG-lncRNA-397	BIG-lncRNA-397.1	chr3	-	142835745-142838606	2	No	No
BIG-lncRNA-398	BIG-lncRNA-398.1	chr3	-	145894273-145896859	2	No	No
BIG-lncRNA-399	BIG-lncRNA-399.1	chr3	-	150112428-150125879	6	Yes	No
BIG-lncRNA-399	BIG-lncRNA-399.2	chr3	-	150114430-150125879	3	Yes	No
BIG-lncRNA-399	BIG-lncRNA-399.3	chr3	-	150119983-150125879	2	Yes	No
BIG-lncRNA-400	BIG-lncRNA-400.1	chr3	+	150965775-150966575	2	Yes	No
BIG-lncRNA-401	BIG-lncRNA-401.1	chr3	+	152198375-152205188	3	No	No
BIG-lncRNA-401	BIG-lncRNA-401.2	chr3	+	152204338-152205188	2	Yes	No
BIG-lncRNA-402	BIG-lncRNA-402.1	chr3	-	152989412-153007272	2	Yes	No
BIG-lncRNA-403	BIG-lncRNA-403.1	chr3	+	153520673-153524422	2	No	No
BIG-lncRNA-404	BIG-lncRNA-404.1	chr3	-	155168608-155171487	2	No	No
BIG-lncRNA-405	BIG-lncRNA-405.1	chr3	+	155905321-155907455	3	No	No
BIG-lncRNA-406	BIG-lncRNA-406.1	chr3	-	156498857-156517529	5	Yes	No
BIG-lncRNA-406	BIG-lncRNA-406.2	chr3	-	156509787-156517529	3	Yes	No
BIG-lncRNA-407	BIG-lncRNA-407.1	chr3	+	159002783-159017893	2	No	No
BIG-lncRNA-408	BIG-lncRNA-408.1	chr3	-	168941544-168955397	7	Yes	No
BIG-lncRNA-408	BIG-lncRNA-408.2	chr3	-	168941544-168955397	9	Yes	No
BIG-lncRNA-408	BIG-lncRNA-408.3	chr3	-	168942067-168955397	9	Yes	No
BIG-lncRNA-409	BIG-lncRNA-409.1	chr3	-	168960010-168960636	2	No	No
BIG-lncRNA-410	BIG-lncRNA-410.1	chr3	-	169040814-169059218	7	Yes	No
BIG-lncRNA-410	BIG-lncRNA-410.2	chr3	-	169040814-169059218	12	Yes	No
BIG-lncRNA-410	BIG-lncRNA-410.3	chr3	-	169040814-169059218	8	Yes	No
BIG-lncRNA-411	BIG-lncRNA-411.1	chr3	-	169060088-169078075	7	Yes	No
BIG-lncRNA-411	BIG-lncRNA-411.2	chr3	-	169060088-169078075	8	Yes	No
BIG-lncRNA-411	BIG-lncRNA-411.3	chr3	-	169060088-169078075	9	Yes	No
BIG-lncRNA-412	BIG-lncRNA-412.1	chr3	-	169238551-169241784	2	No	No
BIG-lncRNA-413	BIG-lncRNA-413.1	chr3	-	169291488-169299177	2	No	No
BIG-lncRNA-414	BIG-lncRNA-414.1	chr3	-	169797259-169801897	3	Yes	No
BIG-lncRNA-415	BIG-lncRNA-415.1	chr3	+	171858563-171862831	5	Yes	No
BIG-lncRNA-415	BIG-lncRNA-415.2	chr3	+	171858563-171863110	5	Yes	No
BIG-lncRNA-415	BIG-lncRNA-415.3	chr3	+	171858586-171863110	5	Yes	No
BIG-lncRNA-415	BIG-lncRNA-415.4	chr3	+	171858586-171862831	5	Yes	No
BIG-lncRNA-416	BIG-lncRNA-416.1	chr3	+	171870387-171874065	3	Yes	Yes
BIG-lncRNA-416	BIG-lncRNA-416.2	chr3	+	171870387-171874065	2	Yes	Yes
BIG-lncRNA-417	BIG-lncRNA-417.1	chr3	+	171874503-171880440	3	Yes	No
BIG-lncRNA-417	BIG-lncRNA-417.2	chr3	+	171874503-171879420	4	Yes	No
BIG-lncRNA-418	BIG-lncRNA-418.1	chr3	+	173128855-173132512	2	No	No
BIG-lncRNA-419	BIG-lncRNA-419.1	chr3	+	173663095-173666203	2	No	No
BIG-lncRNA-420	BIG-lncRNA-420.1	chr3	+	174330281-174332567	2	No	No
BIG-lncRNA-421	BIG-lncRNA-421.1	chr3	+	174498705-174499277	2	No	No
BIG-lncRNA-422	BIG-lncRNA-422.1	chr3	-	176664929-176679828	2	No	No
BIG-lncRNA-423	BIG-lncRNA-423.1	chr3	-	178556691-178559860	2	No	Yes
BIG-lncRNA-424	BIG-lncRNA-424.1	chr3	-	178621113-178621884	2	No	No
BIG-lncRNA-425	BIG-lncRNA-425.1	chr3	+	179208409-179251185	2	No	No
BIG-lncRNA-426	BIG-lncRNA-426.1	chr3	+	180013749-180023242	2	No	No
BIG-lncRNA-427	BIG-lncRNA-427.1	chr3	-	187462341-187463164	1	Yes	Yes
BIG-lncRNA-427	BIG-lncRNA-427.2	chr3	-	187462341-187462694	1	Yes	Yes
BIG-lncRNA-427	BIG-lncRNA-427.3	chr3	-	187462945-187463164	1	Yes	Yes
BIG-lncRNA-427	BIG-lncRNA-427.4	chr3	-	187462965-187463164	1	Yes	Yes
BIG-lncRNA-428	BIG-lncRNA-428.1	chr3	+	189529310-189548685	6	Yes	No
BIG-lncRNA-429	BIG-lncRNA-429.1	chr3	-	189617539-189632719	2	Yes	No
BIG-lncRNA-430	BIG-lncRNA-430.1	chr3	-	192363658-192373828	5	Yes	No
BIG-lncRNA-431	BIG-lncRNA-431.1	chr3	+	193629128-193640069	2	Yes	No
BIG-lncRNA-432	BIG-lncRNA-432.1	chr3	-	194047268-194048833	2	No	No
BIG-lncRNA-433	BIG-lncRNA-433.1	chr3	-	195726850-195728402	3	No	No
BIG-lncRNA-434	BIG-lncRNA-434.1	chr3	-	195765134-195771061	1	Yes	Yes
BIG-lncRNA-434	BIG-lncRNA-434.2	chr3	-	195770600-195771061	1	Yes	Yes
BIG-lncRNA-435	BIG-lncRNA-435.1	chr3	-	196225438-196228912	1	Yes	Yes
BIG-lncRNA-436	BIG-lncRNA-436.1	chr4	-	294291-295714	2	No	No
BIG-lncRNA-437	BIG-lncRNA-437.1	chr4	-	4794970-4795507	2	No	No
BIG-lncRNA-438	BIG-lncRNA-438.1	chr4	-	5699992-5701358	2	No	No
BIG-lncRNA-439	BIG-lncRNA-439.1	chr4	-	6987648-6988743	1	Yes	Yes
BIG-lncRNA-440	BIG-lncRNA-440.1	chr4	+	7516752-7519389	2	No	No
BIG-lncRNA-441	BIG-lncRNA-441.1	chr4	-	9104469-9127380	2	No	No
BIG-lncRNA-442	BIG-lncRNA-442.1	chr4	+	10914670-10949829	6	Yes	No
BIG-lncRNA-442	BIG-lncRNA-442.2	chr4	+	10914670-10948547	16	Yes	No
BIG-lncRNA-443	BIG-lncRNA-443.1	chr4	-	11418607-11424644	3	Yes	No
BIG-lncRNA-443	BIG-lncRNA-443.2	chr4	-	11420572-11424644	2	Yes	No
BIG-lncRNA-443	BIG-lncRNA-443.3	chr4	-	11422439-11424644	2	Yes	No
BIG-lncRNA-444	BIG-lncRNA-444.1	chr4	-	14136667-14145540	2	No	No
BIG-lncRNA-445	BIG-lncRNA-445.1	chr4	-	17516151-17517941	2	No	No
BIG-lncRNA-446	BIG-lncRNA-446.1	chr4	+	19301008-19304120	2	No	No
BIG-lncRNA-447	BIG-lncRNA-447.1	chr4	-	21466051-21467436	2	No	No
BIG-lncRNA-448	BIG-lncRNA-448.1	chr4	-	22689773-22692100	2	No	No
BIG-lncRNA-449	BIG-lncRNA-449.1	chr4	-	24322438-24322844	1	Yes	Yes
BIG-lncRNA-450	BIG-lncRNA-450.1	chr4	+	24330895-24338572	1	Yes	Yes
BIG-lncRNA-450	BIG-lncRNA-450.2	chr4	+	24330895-24342092	1	Yes	Yes
BIG-lncRNA-450	BIG-lncRNA-450.3	chr4	+	24330895-24333228	1	Yes	Yes
BIG-lncRNA-451	BIG-lncRNA-451.1	chr4	+	25164681-25177182	6	No	Yes
BIG-lncRNA-452	BIG-lncRNA-452.1	chr4	-	26289361-26300688	2	Yes	No
BIG-lncRNA-453	BIG-lncRNA-453.1	chr4	-	26452302-26542857	2	No	No
BIG-lncRNA-454	BIG-lncRNA-454.1	chr4	-	27168426-27170109	2	No	No
BIG-lncRNA-455	BIG-lncRNA-455.1	chr4	-	31975706-31979787	2	No	No
BIG-lncRNA-456	BIG-lncRNA-456.1	chr4	+	32065772-32074701	2	No	No
BIG-lncRNA-457	BIG-lncRNA-457.1	chr4	+	33402399-33551544	2	No	No
BIG-lncRNA-458	BIG-lncRNA-458.1	chr4	+	35046430-35062308	2	No	No
BIG-lncRNA-459	BIG-lncRNA-459.1	chr4	-	38734503-38735997	2	No	No
BIG-lncRNA-460	BIG-lncRNA-460.1	chr4	-	44375958-44418183	2	No	No
BIG-lncRNA-461	BIG-lncRNA-461.1	chr4	+	49147608-49157572	2	No	No
BIG-lncRNA-462	BIG-lncRNA-462.1	chr4	+	49199705-49201675	2	No	No
BIG-lncRNA-463	BIG-lncRNA-463.1	chr4	+	49284747-49297743	2	No	No
BIG-lncRNA-464	BIG-lncRNA-464.1	chr4	+	49336860-49529601	2	No	No
BIG-lncRNA-465	BIG-lncRNA-465.1	chr4	-	55453471-55454668	2	Yes	No
BIG-lncRNA-465	BIG-lncRNA-465.2	chr4	-	55453471-55454695	2	Yes	No
BIG-lncRNA-466	BIG-lncRNA-466.1	chr4	+	56269680-56275551	2	Yes	Yes
BIG-lncRNA-466	BIG-lncRNA-466.2	chr4	+	56269680-56275551	2	Yes	Yes
BIG-lncRNA-466	BIG-lncRNA-466.3	chr4	+	56269928-56275551	2	Yes	Yes
BIG-lncRNA-466	BIG-lncRNA-466.4	chr4	+	56269928-56275551	2	Yes	Yes
BIG-lncRNA-466	BIG-lncRNA-466.5	chr4	+	56269928-56275551	2	Yes	Yes
BIG-lncRNA-467	BIG-lncRNA-467.1	chr4	+	56295162-56312787	2	Yes	Yes
BIG-lncRNA-467	BIG-lncRNA-467.2	chr4	+	56295162-56312807	2	Yes	Yes
BIG-lncRNA-468	BIG-lncRNA-468.1	chr4	+	62081288-62163878	41	Yes	Yes
BIG-lncRNA-469	BIG-lncRNA-469.1	chr4	+	64494450-64584586	2	No	No
BIG-lncRNA-470	BIG-lncRNA-470.1	chr4	-	67204356-67298865	3	Yes	No
BIG-lncRNA-471	BIG-lncRNA-471.1	chr4	+	69394337-69559946	2	No	No
BIG-lncRNA-472	BIG-lncRNA-472.1	chr4	-	70144134-70253728	2	No	No
BIG-lncRNA-473	BIG-lncRNA-473.1	chr4	-	72654355-72864429	2	No	No
BIG-lncRNA-474	BIG-lncRNA-474.1	chr4	-	74089627-74116305	15	Yes	No
BIG-lncRNA-474	BIG-lncRNA-474.2	chr4	-	74090325-74116305	12	Yes	No
BIG-lncRNA-474	BIG-lncRNA-474.3	chr4	-	74099077-74116305	11	Yes	No
BIG-lncRNA-475	BIG-lncRNA-475.1	chr4	-	78390776-78469785	2	No	No
BIG-lncRNA-476	BIG-lncRNA-476.1	chr4	+	78741531-78741916	1	Yes	Yes
BIG-lncRNA-476	BIG-lncRNA-476.2	chr4	+	78741555-78741916	1	Yes	Yes
BIG-lncRNA-476	BIG-lncRNA-476.3	chr4	+	78741597-78741916	1	Yes	Yes
BIG-lncRNA-477	BIG-lncRNA-477.1	chr4	+	79904158-79907555	2	No	Yes
BIG-lncRNA-478	BIG-lncRNA-478.1	chr4	-	80273446-80274772	2	No	No
BIG-lncRNA-479	BIG-lncRNA-479.1	chr4	+	81614876-81776064	2	No	No
BIG-lncRNA-480	BIG-lncRNA-480.1	chr4	-	82427699-82430128	2	Yes	No
BIG-lncRNA-480	BIG-lncRNA-480.2	chr4	-	82427699-82430414	2	Yes	No
BIG-lncRNA-480	BIG-lncRNA-480.3	chr4	-	82427699-82430085	2	Yes	No
BIG-lncRNA-480	BIG-lncRNA-480.4	chr4	-	82427699-82430051	2	Yes	No
BIG-lncRNA-481	BIG-lncRNA-481.1	chr4	-	82618548-82634426	3	Yes	No
BIG-lncRNA-482	BIG-lncRNA-482.1	chr4	-	84132922-84152804	2	Yes	No
BIG-lncRNA-483	BIG-lncRNA-483.1	chr4	+	84389291-84391865	2	No	No
BIG-lncRNA-484	BIG-lncRNA-484.1	chr4	-	87497065-87498320	2	No	No
BIG-lncRNA-485	BIG-lncRNA-485.1	chr4	+	88415561-88420435	1	Yes	Yes
BIG-lncRNA-486	BIG-lncRNA-486.1	chr4	+	90862687-90863667	2	No	No
BIG-lncRNA-487	BIG-lncRNA-487.1	chr4	+	92349459-92350179	2	No	No
BIG-lncRNA-488	BIG-lncRNA-488.1	chr4	-	92575783-92581677	2	No	No
BIG-lncRNA-489	BIG-lncRNA-489.1	chr4	-	95624226-95642718	2	No	No
BIG-lncRNA-490	BIG-lncRNA-490.1	chr4	-	99181072-99182306	1	Yes	Yes
BIG-lncRNA-491	BIG-lncRNA-491.1	chr4	+	101913043-101935003	2	No	No
BIG-lncRNA-492	BIG-lncRNA-492.1	chr4	+	103749481-103750800	1	Yes	Yes
BIG-lncRNA-493	BIG-lncRNA-493.1	chr4	+	104862639-104868495	2	No	No
BIG-lncRNA-494	BIG-lncRNA-494.1	chr4	-	107714706-107924540	2	Yes	No
BIG-lncRNA-495	BIG-lncRNA-495.1	chr4	-	110132517-110135518	2	No	No
BIG-lncRNA-496	BIG-lncRNA-496.1	chr4	-	113061815-113066470	2	No	No
BIG-lncRNA-497	BIG-lncRNA-497.1	chr4	-	114769067-114807684	3	No	No
BIG-lncRNA-498	BIG-lncRNA-498.1	chr4	+	115604844-115611122	3	No	No
BIG-lncRNA-499	BIG-lncRNA-499.1	chr4	+	118555183-118601768	2	No	No
BIG-lncRNA-500	BIG-lncRNA-500.1	chr4	+	120012469-120014177	2	No	No
BIG-lncRNA-501	BIG-lncRNA-501.1	chr4	+	120014247-120019558	2	No	No
BIG-lncRNA-502	BIG-lncRNA-502.1	chr4	+	120027203-120030259	2	No	No
BIG-lncRNA-503	BIG-lncRNA-503.1	chr4	+	120442541-120457321	7	Yes	No
BIG-lncRNA-503	BIG-lncRNA-503.2	chr4	+	120442541-120457321	3	Yes	No
BIG-lncRNA-503	BIG-lncRNA-503.3	chr4	+	120442541-120457321	6	Yes	No
BIG-lncRNA-503	BIG-lncRNA-503.4	chr4	+	120442541-120457321	5	Yes	No
BIG-lncRNA-504	BIG-lncRNA-504.1	chr4	+	120458495-120461607	2	Yes	No
BIG-lncRNA-505	BIG-lncRNA-505.1	chr4	-	128799500-128801921	1	Yes	Yes
BIG-lncRNA-505	BIG-lncRNA-505.2	chr4	-	128799501-128801921	1	Yes	Yes
BIG-lncRNA-506	BIG-lncRNA-506.1	chr4	-	128884269-128884941	1	Yes	Yes
BIG-lncRNA-507	BIG-lncRNA-507.1	chr4	+	129225365-129226708	2	No	No
BIG-lncRNA-508	BIG-lncRNA-508.1	chr4	-	130517915-130558731	5	No	Yes
BIG-lncRNA-509	BIG-lncRNA-509.1	chr4	-	130573470-130574366	2	No	No
BIG-lncRNA-510	BIG-lncRNA-510.1	chr4	-	130625256-130626955	2	No	No
BIG-lncRNA-511	BIG-lncRNA-511.1	chr4	-	132813613-132891536	2	No	No
BIG-lncRNA-512	BIG-lncRNA-512.1	chr4	-	139118673-139128149	4	Yes	Yes
BIG-lncRNA-512	BIG-lncRNA-512.2	chr4	-	139118673-139128149	4	Yes	Yes
BIG-lncRNA-512	BIG-lncRNA-512.3	chr4	-	139118673-139128149	4	Yes	Yes
BIG-lncRNA-512	BIG-lncRNA-512.4	chr4	-	139118713-139128149	4	Yes	Yes
BIG-lncRNA-512	BIG-lncRNA-512.5	chr4	-	139118713-139128149	4	Yes	Yes
BIG-lncRNA-512	BIG-lncRNA-512.6	chr4	-	139118713-139128149	4	Yes	Yes
BIG-lncRNA-513	BIG-lncRNA-513.1	chr4	-	139176657-139177380	2	No	No
BIG-lncRNA-514	BIG-lncRNA-514.1	chr4	-	140162335-140163696	2	No	No
BIG-lncRNA-515	BIG-lncRNA-515.1	chr4	-	140877663-140889115	3	Yes	No
BIG-lncRNA-516	BIG-lncRNA-516.1	chr4	-	143489665-143495656	3	Yes	No
BIG-lncRNA-517	BIG-lncRNA-517.1	chr4	-	146539414-146540473	2	No	Yes
BIG-lncRNA-518	BIG-lncRNA-518.1	chr4	-	153418780-153429805	6	Yes	No
BIG-lncRNA-518	BIG-lncRNA-518.2	chr4	-	153418780-153429805	2	Yes	No
BIG-lncRNA-519	BIG-lncRNA-519.1	chr4	+	154028562-154033457	2	No	No
BIG-lncRNA-520	BIG-lncRNA-520.1	chr4	-	158567121-158570715	2	No	No
BIG-lncRNA-521	BIG-lncRNA-521.1	chr4	+	161311999-161313218	2	No	No
BIG-lncRNA-522	BIG-lncRNA-522.1	chr4	+	161328222-161330042	2	No	No
BIG-lncRNA-523	BIG-lncRNA-523.1	chr4	-	164475914-164479991	2	Yes	No
BIG-lncRNA-524	BIG-lncRNA-524.1	chr4	-	166963178-166966722	2	No	No
BIG-lncRNA-525	BIG-lncRNA-525.1	chr4	+	169759845-169765423	2	Yes	Yes
BIG-lncRNA-526	BIG-lncRNA-526.1	chr4	-	170007896-170009977	2	No	No
BIG-lncRNA-527	BIG-lncRNA-527.1	chr4	+	174318492-174383008	22	Yes	No
BIG-lncRNA-528	BIG-lncRNA-528.1	chr4	+	175242615-175248096	2	No	No
BIG-lncRNA-529	BIG-lncRNA-529.1	chr4	+	175304577-175322732	2	No	No
BIG-lncRNA-530	BIG-lncRNA-530.1	chr4	-	176672933-176868506	2	No	No
BIG-lncRNA-531	BIG-lncRNA-531.1	chr4	-	177729359-177735654	2	No	No
BIG-lncRNA-532	BIG-lncRNA-532.1	chr4	+	180059364-180265698	2	No	No
BIG-lncRNA-533	BIG-lncRNA-533.1	chr4	+	183306436-183328249	7	Yes	Yes
BIG-lncRNA-534	BIG-lncRNA-534.1	chr4	-	185122387-185124065	2	No	No
BIG-lncRNA-535	BIG-lncRNA-535.1	chr4	-	185779170-185781287	2	Yes	No
BIG-lncRNA-535	BIG-lncRNA-535.2	chr4	-	185779170-185781340	2	Yes	No
BIG-lncRNA-535	BIG-lncRNA-535.3	chr4	-	185779170-185781203	2	Yes	No
BIG-lncRNA-536	BIG-lncRNA-536.1	chr4	+	186360994-186361689	2	No	No
BIG-lncRNA-537	BIG-lncRNA-537.1	chr4	-	186665452-186672325	3	Yes	No
BIG-lncRNA-538	BIG-lncRNA-538.1	chr4	-	187172678-187181463	2	Yes	No
BIG-lncRNA-539	BIG-lncRNA-539.1	chr4	-	187798187-187799015	2	No	No
BIG-lncRNA-540	BIG-lncRNA-540.1	chr4	+	187971471-187977885	2	No	Yes
BIG-lncRNA-541	BIG-lncRNA-541.1	chr4	+	189424399-189425286	2	No	No
BIG-lncRNA-542	BIG-lncRNA-542.1	chr4	+	189426112-189430638	2	No	No
BIG-lncRNA-543	BIG-lncRNA-543.1	chr4	-	189427203-189428765	3	No	No
BIG-lncRNA-544	BIG-lncRNA-544.1	chr4	+	189542598-189548368	2	No	No
BIG-lncRNA-545	BIG-lncRNA-545.1	chr4	-	190756827-190758694	4	No	No
BIG-lncRNA-546	BIG-lncRNA-546.1	chr4	-	190797284-190800633	2	No	No
BIG-lncRNA-547	BIG-lncRNA-547.1	chr4	+	190892188-190892952	2	No	No
BIG-lncRNA-548	BIG-lncRNA-548.1	chr5	-	699363-793260	2	No	No
BIG-lncRNA-549	BIG-lncRNA-549.1	chr5	-	921792-923397	2	No	No
BIG-lncRNA-550	BIG-lncRNA-550.1	chr5	-	2531731-2532200	2	No	No
BIG-lncRNA-551	BIG-lncRNA-551.1	chr5	+	3099219-3105170	3	No	No
BIG-lncRNA-552	BIG-lncRNA-552.1	chr5	-	6447152-6448052	2	No	No
BIG-lncRNA-553	BIG-lncRNA-553.1	chr5	+	7477966-7539737	2	No	No
BIG-lncRNA-554	BIG-lncRNA-554.1	chr5	-	9008690-9009666	2	No	No
BIG-lncRNA-555	BIG-lncRNA-555.1	chr5	+	14202861-14207022	4	Yes	No
BIG-lncRNA-555	BIG-lncRNA-555.2	chr5	+	14202912-14207022	4	Yes	No
BIG-lncRNA-556	BIG-lncRNA-556.1	chr5	+	14231970-14261604	14	Yes	No
BIG-lncRNA-557	BIG-lncRNA-557.1	chr5	+	14457202-14459397	2	Yes	No
BIG-lncRNA-557	BIG-lncRNA-557.2	chr5	+	14458167-14459397	2	Yes	No
BIG-lncRNA-558	BIG-lncRNA-558.1	chr5	+	15736569-15740746	2	No	No
BIG-lncRNA-559	BIG-lncRNA-559.1	chr5	+	15835824-15839903	2	No	No
BIG-lncRNA-560	BIG-lncRNA-560.1	chr5	+	18538379-18544127	2	No	No
BIG-lncRNA-561	BIG-lncRNA-561.1	chr5	-	18604048-18606609	2	No	No
BIG-lncRNA-562	BIG-lncRNA-562.1	chr5	+	21520482-21525690	2	No	Yes
BIG-lncRNA-563	BIG-lncRNA-563.1	chr5	+	21542632-21563925	2	No	Yes
BIG-lncRNA-564	BIG-lncRNA-564.1	chr5	+	25094693-25096545	2	No	No
BIG-lncRNA-565	BIG-lncRNA-565.1	chr5	-	32999707-33008164	2	Yes	No
BIG-lncRNA-566	BIG-lncRNA-566.1	chr5	-	33180337-33229309	16	Yes	No
BIG-lncRNA-567	BIG-lncRNA-567.1	chr5	-	34075337-34077267	2	No	No
BIG-lncRNA-568	BIG-lncRNA-568.1	chr5	-	34154382-34155544	2	No	No
BIG-lncRNA-569	BIG-lncRNA-569.1	chr5	+	39526739-39561212	2	No	No
BIG-lncRNA-570	BIG-lncRNA-570.1	chr5	+	43072457-43078387	2	Yes	Yes
BIG-lncRNA-570	BIG-lncRNA-570.2	chr5	+	43072457-43079974	2	Yes	Yes
BIG-lncRNA-570	BIG-lncRNA-570.3	chr5	+	43072457-43079974	3	Yes	Yes
BIG-lncRNA-570	BIG-lncRNA-570.4	chr5	+	43072457-43078387	3	Yes	Yes
BIG-lncRNA-571	BIG-lncRNA-571.1	chr5	+	43987699-44236963	2	No	No
BIG-lncRNA-572	BIG-lncRNA-572.1	chr5	+	44846948-44855779	2	No	Yes
BIG-lncRNA-573	BIG-lncRNA-573.1	chr5	+	46201536-46331435	4	No	No
BIG-lncRNA-574	BIG-lncRNA-574.1	chr5	+	46323001-46356125	3	No	No
BIG-lncRNA-575	BIG-lncRNA-575.1	chr5	-	46340382-46364798	3	No	No
BIG-lncRNA-576	BIG-lncRNA-576.1	chr5	+	46370116-46402009	2	No	No
BIG-lncRNA-577	BIG-lncRNA-577.1	chr5	+	49984885-50007793	7	Yes	No
BIG-lncRNA-577	BIG-lncRNA-577.2	chr5	+	49984885-50012439	3	Yes	No
BIG-lncRNA-578	BIG-lncRNA-578.1	chr5	-	52537157-52543220	2	No	No
BIG-lncRNA-579	BIG-lncRNA-579.1	chr5	-	52856246-52856767	1	Yes	Yes
BIG-lncRNA-580	BIG-lncRNA-580.1	chr5	-	55494004-55718956	2	No	No
BIG-lncRNA-581	BIG-lncRNA-581.1	chr5	+	55718176-55724222	2	No	No
BIG-lncRNA-582	BIG-lncRNA-582.1	chr5	+	57384994-57386199	2	No	No
BIG-lncRNA-583	BIG-lncRNA-583.1	chr5	-	58588421-58593445	2	No	Yes
BIG-lncRNA-583	BIG-lncRNA-583.2	chr5	-	58588421-58593445	2	No	Yes
BIG-lncRNA-583	BIG-lncRNA-583.3	chr5	-	58588422-58595936	1	Yes	Yes
BIG-lncRNA-584	BIG-lncRNA-584.1	chr5	-	59560556-59561412	2	No	No
BIG-lncRNA-585	BIG-lncRNA-585.1	chr5	+	60717796-60731682	7	No	Yes
BIG-lncRNA-586	BIG-lncRNA-586.1	chr5	+	60788858-60805690	5	No	Yes
BIG-lncRNA-587	BIG-lncRNA-587.1	chr5	-	63763285-63986547	2	No	No
BIG-lncRNA-588	BIG-lncRNA-588.1	chr5	+	67734902-67741033	2	No	No
BIG-lncRNA-589	BIG-lncRNA-589.1	chr5	+	69006854-69008613	2	No	No
BIG-lncRNA-590	BIG-lncRNA-590.1	chr5	-	69029977-69037762	2	No	No
BIG-lncRNA-591	BIG-lncRNA-591.1	chr5	+	69046297-69101025	2	No	No
BIG-lncRNA-592	BIG-lncRNA-592.1	chr5	-	69054588-69063468	4	No	No
BIG-lncRNA-593	BIG-lncRNA-593.1	chr5	-	69652750-69653846	2	No	No
BIG-lncRNA-594	BIG-lncRNA-594.1	chr5	+	69882122-69883883	2	No	No
BIG-lncRNA-595	BIG-lncRNA-595.1	chr5	+	69921609-69975967	2	No	No
BIG-lncRNA-596	BIG-lncRNA-596.1	chr5	-	70651320-70653286	2	No	No
BIG-lncRNA-597	BIG-lncRNA-597.1	chr5	+	71775785-71984040	2	No	No
BIG-lncRNA-598	BIG-lncRNA-598.1	chr5	+	74178829-74185885	2	No	No
BIG-lncRNA-599	BIG-lncRNA-599.1	chr5	+	74908313-74912586	2	No	No
BIG-lncRNA-600	BIG-lncRNA-600.1	chr5	+	81701766-81752042	10	Yes	No
BIG-lncRNA-601	BIG-lncRNA-601.1	chr5	-	85839954-85840834	2	No	No
BIG-lncRNA-602	BIG-lncRNA-602.1	chr5	-	86647371-86655413	2	No	Yes
BIG-lncRNA-603	BIG-lncRNA-603.1	chr5	+	87610408-87615977	3	Yes	No
BIG-lncRNA-604	BIG-lncRNA-604.1	chr5	-	88205022-88215143	2	No	No
BIG-lncRNA-605	BIG-lncRNA-605.1	chr5	+	90608155-90608364	1	Yes	Yes
BIG-lncRNA-606	BIG-lncRNA-606.1	chr5	+	95297950-95304863	3	Yes	No
BIG-lncRNA-606	BIG-lncRNA-606.2	chr5	+	95297950-95309646	4	Yes	No
BIG-lncRNA-606	BIG-lncRNA-606.3	chr5	+	95298062-95304863	3	Yes	No
BIG-lncRNA-606	BIG-lncRNA-606.4	chr5	+	95298062-95309646	4	Yes	No
BIG-lncRNA-607	BIG-lncRNA-607.1	chr5	+	95475526-95477948	2	No	No
BIG-lncRNA-608	BIG-lncRNA-608.1	chr5	+	95804748-95805914	2	No	No
BIG-lncRNA-609	BIG-lncRNA-609.1	chr5	-	103375653-103406186	3	No	No
BIG-lncRNA-610	BIG-lncRNA-610.1	chr5	+	103543025-103550319	3	Yes	No
BIG-lncRNA-610	BIG-lncRNA-610.2	chr5	+	103543025-103550319	2	Yes	No
BIG-lncRNA-611	BIG-lncRNA-611.1	chr5	+	103551491-103558081	2	Yes	No
BIG-lncRNA-611	BIG-lncRNA-611.2	chr5	+	103551491-103558081	3	Yes	No
BIG-lncRNA-611	BIG-lncRNA-611.3	chr5	+	103552623-103558081	3	Yes	No
BIG-lncRNA-611	BIG-lncRNA-611.4	chr5	+	103552623-103558081	2	Yes	No
BIG-lncRNA-612	BIG-lncRNA-612.1	chr5	+	103625325-103637351	4	Yes	No
BIG-lncRNA-613	BIG-lncRNA-613.1	chr5	-	104089246-104090604	2	No	No
BIG-lncRNA-614	BIG-lncRNA-614.1	chr5	-	106815726-106837920	10	Yes	No
BIG-lncRNA-614	BIG-lncRNA-614.2	chr5	-	106815726-106837885	10	Yes	No
BIG-lncRNA-614	BIG-lncRNA-614.3	chr5	-	106815726-106837660	10	Yes	No
BIG-lncRNA-614	BIG-lncRNA-614.4	chr5	-	106815726-106837874	10	Yes	No
BIG-lncRNA-615	BIG-lncRNA-615.1	chr5	+	108745596-108747236	1	Yes	Yes
BIG-lncRNA-615	BIG-lncRNA-615.2	chr5	+	108746477-108747236	1	Yes	Yes
BIG-lncRNA-616	BIG-lncRNA-616.1	chr5	-	116203687-116383124	2	No	No
BIG-lncRNA-617	BIG-lncRNA-617.1	chr5	+	117006369-117016953	3	No	No
BIG-lncRNA-618	BIG-lncRNA-618.1	chr5	+	131613477-131616515	2	No	No
BIG-lncRNA-619	BIG-lncRNA-619.1	chr5	+	131843103-131845021	2	No	No
BIG-lncRNA-620	BIG-lncRNA-620.1	chr5	-	135333687-135337469	2	No	No
BIG-lncRNA-621	BIG-lncRNA-621.1	chr5	-	140969624-140988734	3	Yes	No
BIG-lncRNA-621	BIG-lncRNA-621.2	chr5	-	140970254-140988734	3	Yes	No
BIG-lncRNA-621	BIG-lncRNA-621.3	chr5	-	140977055-140988734	3	Yes	No
BIG-lncRNA-621	BIG-lncRNA-621.4	chr5	-	140978653-140988734	3	Yes	No
BIG-lncRNA-621	BIG-lncRNA-621.5	chr5	-	140978653-140988734	3	Yes	No
BIG-lncRNA-621	BIG-lncRNA-621.6	chr5	-	140979723-140988734	3	Yes	No
BIG-lncRNA-621	BIG-lncRNA-621.7	chr5	-	140982378-140988734	3	Yes	No
BIG-lncRNA-621	BIG-lncRNA-621.8	chr5	-	140983002-140988734	3	Yes	No
BIG-lncRNA-621	BIG-lncRNA-621.9	chr5	-	140983002-140988734	3	Yes	No
BIG-lncRNA-621	BIG-lncRNA-621.10	chr5	-	140983932-140988734	3	Yes	No
BIG-lncRNA-621	BIG-lncRNA-621.11	chr5	-	140984948-140988734	3	Yes	No
BIG-lncRNA-622	BIG-lncRNA-622.1	chr5	+	141392726-141393053	1	Yes	Yes
BIG-lncRNA-623	BIG-lncRNA-623.1	chr5	+	141869088-141871957	2	No	No
BIG-lncRNA-624	BIG-lncRNA-624.1	chr5	+	141903654-141927087	2	No	No
BIG-lncRNA-625	BIG-lncRNA-625.1	chr5	-	145474655-145477108	2	No	No
BIG-lncRNA-626	BIG-lncRNA-626.1	chr5	-	147752190-147756941	2	Yes	No
BIG-lncRNA-626	BIG-lncRNA-626.2	chr5	-	147752190-147756904	2	Yes	No
BIG-lncRNA-627	BIG-lncRNA-627.1	chr5	+	157372276-157396086	2	No	No
BIG-lncRNA-628	BIG-lncRNA-628.1	chr5	-	158405793-158433654	3	Yes	No
BIG-lncRNA-628	BIG-lncRNA-628.2	chr5	-	158407249-158433654	6	Yes	No
BIG-lncRNA-628	BIG-lncRNA-628.3	chr5	-	158410362-158433654	6	Yes	No
BIG-lncRNA-628	BIG-lncRNA-628.4	chr5	-	158412836-158433654	6	Yes	No
BIG-lncRNA-628	BIG-lncRNA-628.5	chr5	-	158412836-158433654	3	Yes	No
BIG-lncRNA-628	BIG-lncRNA-628.6	chr5	-	158417287-158433654	3	Yes	No
BIG-lncRNA-628	BIG-lncRNA-628.7	chr5	-	158417287-158433654	6	Yes	No
BIG-lncRNA-628	BIG-lncRNA-628.8	chr5	-	158418490-158433654	6	Yes	No
BIG-lncRNA-628	BIG-lncRNA-628.9	chr5	-	158420172-158433654	3	Yes	No
BIG-lncRNA-628	BIG-lncRNA-628.10	chr5	-	158420172-158433654	6	Yes	No
BIG-lncRNA-628	BIG-lncRNA-628.11	chr5	-	158421555-158433654	3	Yes	No
BIG-lncRNA-629	BIG-lncRNA-629.1	chr5	-	158449817-158469737	4	Yes	No
BIG-lncRNA-629	BIG-lncRNA-629.2	chr5	-	158449817-158469737	11	Yes	No
BIG-lncRNA-629	BIG-lncRNA-629.3	chr5	-	158458829-158469737	4	Yes	No
BIG-lncRNA-630	BIG-lncRNA-630.1	chr5	-	158469800-158479357	5	Yes	No
BIG-lncRNA-630	BIG-lncRNA-630.2	chr5	-	158469800-158479860	5	Yes	No
BIG-lncRNA-630	BIG-lncRNA-630.3	chr5	-	158472865-158479860	2	Yes	No
BIG-lncRNA-630	BIG-lncRNA-630.4	chr5	-	158472865-158479357	2	Yes	No
BIG-lncRNA-631	BIG-lncRNA-631.1	chr5	-	158480407-158488550	5	Yes	No
BIG-lncRNA-631	BIG-lncRNA-631.2	chr5	-	158481447-158488550	4	Yes	No
BIG-lncRNA-632	BIG-lncRNA-632.1	chr5	-	158489064-158494163	2	Yes	No
BIG-lncRNA-633	BIG-lncRNA-633.1	chr5	+	158717946-158723151	3	No	No
BIG-lncRNA-634	BIG-lncRNA-634.1	chr5	+	158893000-158894680	2	No	No
BIG-lncRNA-635	BIG-lncRNA-635.1	chr5	+	159846467-159846754	1	Yes	Yes
BIG-lncRNA-636	BIG-lncRNA-636.1	chr5	-	168531612-168554099	2	No	No
BIG-lncRNA-637	BIG-lncRNA-637.1	chr5	+	169286993-169317017	5	Yes	No
BIG-lncRNA-638	BIG-lncRNA-638.1	chr5	+	171434040-171434361	1	Yes	Yes
BIG-lncRNA-638	BIG-lncRNA-638.2	chr5	+	171434041-171434361	1	Yes	Yes
BIG-lncRNA-638	BIG-lncRNA-638.3	chr5	+	171434041-171434347	1	Yes	Yes
BIG-lncRNA-639	BIG-lncRNA-639.1	chr5	-	173099721-173117755	2	No	No
BIG-lncRNA-640	BIG-lncRNA-640.1	chr5	-	173711463-173722839	2	No	No
BIG-lncRNA-641	BIG-lncRNA-641.1	chr5	-	174461926-174462265	2	No	No
BIG-lncRNA-642	BIG-lncRNA-642.1	chr5	+	175331485-175337481	2	No	No
BIG-lncRNA-643	BIG-lncRNA-643.1	chr5	-	177713763-177853029	2	No	No
BIG-lncRNA-644	BIG-lncRNA-644.1	chr5	-	177745877-177775208	2	No	No
BIG-lncRNA-645	BIG-lncRNA-645.1	chr5	-	177927064-177928337	2	No	No
BIG-lncRNA-646	BIG-lncRNA-646.1	chr5	-	178012208-178012750	2	No	No
BIG-lncRNA-647	BIG-lncRNA-647.1	chr5	+	180790155-180791748	2	No	No
BIG-lncRNA-648	BIG-lncRNA-648.1	chr6	+	193870-196146	2	No	No
BIG-lncRNA-649	BIG-lncRNA-649.1	chr6	+	468995-469632	2	No	No
BIG-lncRNA-650	BIG-lncRNA-650.1	chr6	-	1533843-1535435	2	No	No
BIG-lncRNA-651	BIG-lncRNA-651.1	chr6	+	3094125-3094613	2	No	No
BIG-lncRNA-652	BIG-lncRNA-652.1	chr6	-	3650062-3651316	2	No	No
BIG-lncRNA-653	BIG-lncRNA-653.1	chr6	+	5096415-5099384	2	No	No
BIG-lncRNA-654	BIG-lncRNA-654.1	chr6	+	5898174-5900625	2	No	No
BIG-lncRNA-655	BIG-lncRNA-655.1	chr6	+	6932415-6933368	2	No	No
BIG-lncRNA-656	BIG-lncRNA-656.1	chr6	-	6932624-6932903	2	No	No
BIG-lncRNA-657	BIG-lncRNA-657.1	chr6	-	7968022-7969129	2	No	No
BIG-lncRNA-658	BIG-lncRNA-658.1	chr6	+	10306347-10316292	3	No	No
BIG-lncRNA-659	BIG-lncRNA-659.1	chr6	+	10761948-10776707	5	Yes	Yes
BIG-lncRNA-660	BIG-lncRNA-660.1	chr6	-	11522421-11524137	2	No	No
BIG-lncRNA-661	BIG-lncRNA-661.1	chr6	+	12577729-12587287	2	No	No
BIG-lncRNA-662	BIG-lncRNA-662.1	chr6	+	12829642-12834431	2	No	No
BIG-lncRNA-663	BIG-lncRNA-663.1	chr6	-	14464000-14713287	2	Yes	No
BIG-lncRNA-664	BIG-lncRNA-664.1	chr6	+	14733259-14734862	2	Yes	No
BIG-lncRNA-665	BIG-lncRNA-665.1	chr6	+	15848097-15917246	2	No	No
BIG-lncRNA-666	BIG-lncRNA-666.1	chr6	-	16416583-16420990	4	Yes	No
BIG-lncRNA-667	BIG-lncRNA-667.1	chr6	-	16676740-16681890	2	Yes	No
BIG-lncRNA-668	BIG-lncRNA-668.1	chr6	-	16683328-16688770	3	Yes	No
BIG-lncRNA-668	BIG-lncRNA-668.2	chr6	-	16684426-16688770	3	Yes	No
BIG-lncRNA-669	BIG-lncRNA-669.1	chr6	-	16690049-16700841	7	Yes	No
BIG-lncRNA-669	BIG-lncRNA-669.2	chr6	-	16690049-16699909	7	Yes	No
BIG-lncRNA-669	BIG-lncRNA-669.3	chr6	-	16690049-16700841	6	Yes	No
BIG-lncRNA-669	BIG-lncRNA-669.4	chr6	-	16690049-16700793	7	Yes	No
BIG-lncRNA-669	BIG-lncRNA-669.5	chr6	-	16690049-16700764	6	Yes	No
BIG-lncRNA-669	BIG-lncRNA-669.6	chr6	-	16690049-16699735	7	Yes	No
BIG-lncRNA-669	BIG-lncRNA-669.7	chr6	-	16690049-16699735	6	Yes	No
BIG-lncRNA-669	BIG-lncRNA-669.8	chr6	-	16690049-16700764	7	Yes	No
BIG-lncRNA-669	BIG-lncRNA-669.9	chr6	-	16690049-16699909	6	Yes	No
BIG-lncRNA-669	BIG-lncRNA-669.10	chr6	-	16690049-16699702	7	Yes	No
BIG-lncRNA-669	BIG-lncRNA-669.11	chr6	-	16690049-16700793	6	Yes	No
BIG-lncRNA-669	BIG-lncRNA-669.12	chr6	-	16690049-16699702	6	Yes	No
BIG-lncRNA-670	BIG-lncRNA-670.1	chr6	+	16948042-16949599	2	No	No
BIG-lncRNA-671	BIG-lncRNA-671.1	chr6	+	21720605-21721376	2	No	No
BIG-lncRNA-672	BIG-lncRNA-672.1	chr6	-	30736078-30737526	2	No	No
BIG-lncRNA-673	BIG-lncRNA-673.1	chr6	-	30985123-30989661	3	No	No
BIG-lncRNA-674	BIG-lncRNA-674.1	chr6	-	31587629-31588086	1	Yes	Yes
BIG-lncRNA-674	BIG-lncRNA-674.2	chr6	-	31587629-31588117	1	Yes	Yes
BIG-lncRNA-675	BIG-lncRNA-675.1	chr6	+	33017334-33026552	2	No	No
BIG-lncRNA-676	BIG-lncRNA-676.1	chr6	+	33945427-34188682	2	No	No
BIG-lncRNA-677	BIG-lncRNA-677.1	chr6	-	34178061-34187945	2	No	No
BIG-lncRNA-678	BIG-lncRNA-678.1	chr6	-	34202212-34204534	2	Yes	No
BIG-lncRNA-679	BIG-lncRNA-679.1	chr6	+	37307279-37308036	2	No	No
BIG-lncRNA-680	BIG-lncRNA-680.1	chr6	+	37822763-37827614	4	Yes	No
BIG-lncRNA-681	BIG-lncRNA-681.1	chr6	+	37863260-37877914	11	Yes	No
BIG-lncRNA-681	BIG-lncRNA-681.2	chr6	+	37863260-37896262	21	Yes	No
BIG-lncRNA-682	BIG-lncRNA-682.1	chr6	+	37897835-37915029	13	Yes	No
BIG-lncRNA-683	BIG-lncRNA-683.1	chr6	-	41934398-41935433	2	No	No
BIG-lncRNA-684	BIG-lncRNA-684.1	chr6	-	43989529-43992702	2	No	No
BIG-lncRNA-685	BIG-lncRNA-685.1	chr6	-	45267340-45291954	12	No	Yes
BIG-lncRNA-686	BIG-lncRNA-686.1	chr6	+	45345338-45348834	2	Yes	Yes
BIG-lncRNA-686	BIG-lncRNA-686.2	chr6	+	45345919-45348834	2	Yes	Yes
BIG-lncRNA-686	BIG-lncRNA-686.3	chr6	+	45345920-45348834	1	Yes	Yes
BIG-lncRNA-686	BIG-lncRNA-686.4	chr6	+	45346413-45348834	2	Yes	Yes
BIG-lncRNA-686	BIG-lncRNA-686.5	chr6	+	45346414-45348834	1	Yes	Yes
BIG-lncRNA-687	BIG-lncRNA-687.1	chr6	+	45542946-45555834	2	Yes	No
BIG-lncRNA-688	BIG-lncRNA-688.1	chr6	-	58196397-58210564	2	No	No
BIG-lncRNA-689	BIG-lncRNA-689.1	chr6	-	58199404-58199733	2	No	No
BIG-lncRNA-690	BIG-lncRNA-690.1	chr6	+	63504017-63717965	2	No	No
BIG-lncRNA-691	BIG-lncRNA-691.1	chr6	-	64048259-64198444	3	No	No
BIG-lncRNA-692	BIG-lncRNA-692.1	chr6	+	69395545-69402655	2	No	No
BIG-lncRNA-693	BIG-lncRNA-693.1	chr6	+	73345423-73351344	2	Yes	No
BIG-lncRNA-693	BIG-lncRNA-693.2	chr6	+	73351187-73355821	3	Yes	No
BIG-lncRNA-693	BIG-lncRNA-693.3	chr6	+	73351187-73355045	2	Yes	No
BIG-lncRNA-694	BIG-lncRNA-694.1	chr6	-	77744701-77756086	4	No	Yes
BIG-lncRNA-695	BIG-lncRNA-695.1	chr6	+	79619976-79621243	2	No	Yes
BIG-lncRNA-695	BIG-lncRNA-695.2	chr6	+	79619976-79622648	2	No	Yes
BIG-lncRNA-696	BIG-lncRNA-696.1	chr6	-	85376521-85379930	2	No	Yes
BIG-lncRNA-697	BIG-lncRNA-697.1	chr6	+	89153461-89159867	2	No	No
BIG-lncRNA-698	BIG-lncRNA-698.1	chr6	+	89803658-89807736	1	Yes	Yes
BIG-lncRNA-698	BIG-lncRNA-698.2	chr6	+	89803659-89807736	1	Yes	Yes
BIG-lncRNA-699	BIG-lncRNA-699.1	chr6	+	90430874-90431212	1	Yes	Yes
BIG-lncRNA-700	BIG-lncRNA-700.1	chr6	+	105992799-106073302	2	No	No
BIG-lncRNA-701	BIG-lncRNA-701.1	chr6	+	106441722-106448541	1	Yes	Yes
BIG-lncRNA-701	BIG-lncRNA-701.2	chr6	+	106441723-106448541	1	Yes	Yes
BIG-lncRNA-702	BIG-lncRNA-702.1	chr6	-	106939039-106950096	2	Yes	No
BIG-lncRNA-703	BIG-lncRNA-703.1	chr6	+	109034321-109035551	2	No	No
BIG-lncRNA-704	BIG-lncRNA-704.1	chr6	+	109492319-109494365	2	No	Yes
BIG-lncRNA-705	BIG-lncRNA-705.1	chr6	-	113008705-113010126	1	Yes	Yes
BIG-lncRNA-706	BIG-lncRNA-706.1	chr6	-	116388874-116395626	2	No	No
BIG-lncRNA-707	BIG-lncRNA-707.1	chr6	+	120212207-120213392	2	No	No
BIG-lncRNA-708	BIG-lncRNA-708.1	chr6	+	120342777-120583649	2	No	No
BIG-lncRNA-709	BIG-lncRNA-709.1	chr6	-	124123214-124125121	1	Yes	Yes
BIG-lncRNA-710	BIG-lncRNA-710.1	chr6	+	124737042-124754555	8	Yes	No
BIG-lncRNA-711	BIG-lncRNA-711.1	chr6	+	124759040-124771630	4	Yes	No
BIG-lncRNA-712	BIG-lncRNA-712.1	chr6	+	126392819-126418827	10	Yes	Yes
BIG-lncRNA-713	BIG-lncRNA-713.1	chr6	+	126470012-126474139	2	No	No
BIG-lncRNA-714	BIG-lncRNA-714.1	chr6	+	126608116-126635038	4	Yes	No
BIG-lncRNA-714	BIG-lncRNA-714.2	chr6	+	126608116-126611834	3	Yes	No
BIG-lncRNA-715	BIG-lncRNA-715.1	chr6	-	130073982-130088712	2	Yes	No
BIG-lncRNA-716	BIG-lncRNA-716.1	chr6	+	130878921-130938698	4	Yes	No
BIG-lncRNA-717	BIG-lncRNA-717.1	chr6	+	132028723-132029578	2	No	No
BIG-lncRNA-718	BIG-lncRNA-718.1	chr6	+	132288656-132290468	3	No	No
BIG-lncRNA-719	BIG-lncRNA-719.1	chr6	-	134628053-134637880	4	Yes	No
BIG-lncRNA-720	BIG-lncRNA-720.1	chr6	-	138964084-138977175	7	Yes	No
BIG-lncRNA-721	BIG-lncRNA-721.1	chr6	-	139067244-139068326	2	No	No
BIG-lncRNA-722	BIG-lncRNA-722.1	chr6	-	140879458-140883782	2	No	No
BIG-lncRNA-723	BIG-lncRNA-723.1	chr6	+	141005534-141006833	2	No	No
BIG-lncRNA-724	BIG-lncRNA-724.1	chr6	+	141420962-141422763	2	No	No
BIG-lncRNA-725	BIG-lncRNA-725.1	chr6	-	143153395-143174976	8	Yes	Yes
BIG-lncRNA-725	BIG-lncRNA-725.2	chr6	-	143153395-143174976	9	Yes	Yes
BIG-lncRNA-725	BIG-lncRNA-725.3	chr6	-	143153395-143174976	9	Yes	Yes
BIG-lncRNA-726	BIG-lncRNA-726.1	chr6	-	143191764-143206411	4	Yes	No
BIG-lncRNA-726	BIG-lncRNA-726.2	chr6	-	143192748-143206411	4	Yes	No
BIG-lncRNA-726	BIG-lncRNA-726.3	chr6	-	143192748-143206411	4	Yes	No
BIG-lncRNA-727	BIG-lncRNA-727.1	chr6	-	143244951-143247956	2	Yes	No
BIG-lncRNA-728	BIG-lncRNA-728.1	chr6	-	143252376-143253971	2	No	No
BIG-lncRNA-729	BIG-lncRNA-729.1	chr6	-	143338133-143342022	1	Yes	Yes
BIG-lncRNA-730	BIG-lncRNA-730.1	chr6	+	144329353-144332641	1	Yes	Yes
BIG-lncRNA-731	BIG-lncRNA-731.1	chr6	+	147954846-147965512	4	Yes	No
BIG-lncRNA-731	BIG-lncRNA-731.2	chr6	+	147954846-147965512	4	Yes	No
BIG-lncRNA-732	BIG-lncRNA-732.1	chr6	+	148058837-148088433	5	Yes	No
BIG-lncRNA-733	BIG-lncRNA-733.1	chr6	+	148196309-148222762	2	No	No
BIG-lncRNA-734	BIG-lncRNA-734.1	chr6	+	150929119-150929609	2	No	Yes
BIG-lncRNA-735	BIG-lncRNA-735.1	chr6	+	151819289-151821496	2	No	No
BIG-lncRNA-736	BIG-lncRNA-736.1	chr6	+	151822744-151823983	2	No	No
BIG-lncRNA-737	BIG-lncRNA-737.1	chr6	-	153370909-153374272	2	No	No
BIG-lncRNA-738	BIG-lncRNA-738.1	chr6	+	155158487-155163255	2	No	Yes
BIG-lncRNA-739	BIG-lncRNA-739.1	chr6	+	157342724-157352176	5	Yes	No
BIG-lncRNA-740	BIG-lncRNA-740.1	chr6	+	158162296-158163243	2	No	No
BIG-lncRNA-741	BIG-lncRNA-741.1	chr6	-	164136143-164137903	2	No	No
BIG-lncRNA-742	BIG-lncRNA-742.1	chr6	-	166032137-166033392	2	No	No
BIG-lncRNA-743	BIG-lncRNA-743.1	chr6	-	167197894-167198236	2	No	No
BIG-lncRNA-744	BIG-lncRNA-744.1	chr6	-	167209969-167211240	2	No	No
BIG-lncRNA-745	BIG-lncRNA-745.1	chr6	+	168062394-168067515	2	No	No
BIG-lncRNA-746	BIG-lncRNA-746.1	chr6	-	168663798-168665697	2	No	No
BIG-lncRNA-747	BIG-lncRNA-747.1	chr6	+	168683881-168686525	2	No	No
BIG-lncRNA-748	BIG-lncRNA-748.1	chr6	+	170747588-170750080	2	No	No
BIG-lncRNA-749	BIG-lncRNA-749.1	chr6	-	170820904-170823453	2	No	No
BIG-lncRNA-750	BIG-lncRNA-750.1	chr7	+	3501787-3507141	2	Yes	No
BIG-lncRNA-750	BIG-lncRNA-750.2	chr7	+	3501787-3507141	3	Yes	No
BIG-lncRNA-751	BIG-lncRNA-751.1	chr7	+	4624609-4634820	2	No	No
BIG-lncRNA-752	BIG-lncRNA-752.1	chr7	+	7875132-7889818	2	Yes	No
BIG-lncRNA-753	BIG-lncRNA-753.1	chr7	+	8488443-8592061	2	No	No
BIG-lncRNA-754	BIG-lncRNA-754.1	chr7	-	9393090-9497735	2	No	No
BIG-lncRNA-755	BIG-lncRNA-755.1	chr7	+	12997534-13013818	3	Yes	No
BIG-lncRNA-756	BIG-lncRNA-756.1	chr7	+	22616513-22620288	2	Yes	Yes
BIG-lncRNA-756	BIG-lncRNA-756.2	chr7	+	22617466-22620288	2	Yes	Yes
BIG-lncRNA-756	BIG-lncRNA-756.3	chr7	+	22617500-22620288	2	Yes	Yes
BIG-lncRNA-757	BIG-lncRNA-757.1	chr7	+	25064990-25073270	2	Yes	No
BIG-lncRNA-758	BIG-lncRNA-758.1	chr7	+	26492843-26501747	2	No	No
BIG-lncRNA-759	BIG-lncRNA-759.1	chr7	+	27215076-27217265	1	Yes	Yes
BIG-lncRNA-760	BIG-lncRNA-760.1	chr7	-	28206241-28213498	3	Yes	No
BIG-lncRNA-760	BIG-lncRNA-760.2	chr7	-	28206241-28213498	2	Yes	No
BIG-lncRNA-760	BIG-lncRNA-760.3	chr7	-	28208062-28219509	3	Yes	No
BIG-lncRNA-760	BIG-lncRNA-760.4	chr7	-	28208062-28219509	2	Yes	No
BIG-lncRNA-761	BIG-lncRNA-761.1	chr7	+	30216818-30221470	2	Yes	No
BIG-lncRNA-761	BIG-lncRNA-761.2	chr7	+	30220569-30223522	3	Yes	No
BIG-lncRNA-762	BIG-lncRNA-762.1	chr7	+	30224653-30246438	4	Yes	No
BIG-lncRNA-762	BIG-lncRNA-762.2	chr7	+	30225372-30246438	4	Yes	No
BIG-lncRNA-763	BIG-lncRNA-763.1	chr7	+	33711556-33716779	2	Yes	No
BIG-lncRNA-763	BIG-lncRNA-763.2	chr7	+	33711557-33712566	2	Yes	No
BIG-lncRNA-764	BIG-lncRNA-764.1	chr7	+	33808169-33810494	2	No	No
BIG-lncRNA-765	BIG-lncRNA-765.1	chr7	+	33811498-33813359	2	No	No
BIG-lncRNA-766	BIG-lncRNA-766.1	chr7	+	37598305-37600315	2	No	No
BIG-lncRNA-767	BIG-lncRNA-767.1	chr7	-	39634403-39642118	4	No	No
BIG-lncRNA-767	BIG-lncRNA-767.2	chr7	-	39634403-39642132	3	No	No
BIG-lncRNA-768	BIG-lncRNA-768.1	chr7	+	41287281-41295076	2	No	No
BIG-lncRNA-769	BIG-lncRNA-769.1	chr7	+	41918435-41919460	2	No	No
BIG-lncRNA-770	BIG-lncRNA-770.1	chr7	+	44233876-44237836	2	Yes	No
BIG-lncRNA-771	BIG-lncRNA-771.1	chr7	+	44613624-44616150	1	Yes	Yes
BIG-lncRNA-772	BIG-lncRNA-772.1	chr7	-	51476811-51497939	2	No	No
BIG-lncRNA-773	BIG-lncRNA-773.1	chr7	+	52216360-52370467	3	No	No
BIG-lncRNA-774	BIG-lncRNA-774.1	chr7	-	52513582-52725853	2	No	No
BIG-lncRNA-775	BIG-lncRNA-775.1	chr7	+	55088626-55088878	1	Yes	Yes
BIG-lncRNA-776	BIG-lncRNA-776.1	chr7	+	55149431-55152466	2	Yes	No
BIG-lncRNA-776	BIG-lncRNA-776.2	chr7	+	55149431-55157578	5	Yes	No
BIG-lncRNA-777	BIG-lncRNA-777.1	chr7	+	55434049-55435705	1	Yes	Yes
BIG-lncRNA-778	BIG-lncRNA-778.1	chr7	-	55608502-55619713	2	Yes	Yes
BIG-lncRNA-779	BIG-lncRNA-779.1	chr7	-	55623678-55624105	2	No	No
BIG-lncRNA-780	BIG-lncRNA-780.1	chr7	+	57939644-58040301	4	No	No
BIG-lncRNA-781	BIG-lncRNA-781.1	chr7	+	57941891-57968180	2	No	No
BIG-lncRNA-782	BIG-lncRNA-782.1	chr7	+	57946574-58041805	3	No	No
BIG-lncRNA-783	BIG-lncRNA-783.1	chr7	+	57947108-58018777	3	No	No
BIG-lncRNA-784	BIG-lncRNA-784.1	chr7	+	57951128-57994842	4	No	No
BIG-lncRNA-785	BIG-lncRNA-785.1	chr7	+	57963587-57970618	2	No	No
BIG-lncRNA-786	BIG-lncRNA-786.1	chr7	+	57974735-58019960	2	No	No
BIG-lncRNA-787	BIG-lncRNA-787.1	chr7	+	57989307-58030215	2	No	No
BIG-lncRNA-788	BIG-lncRNA-788.1	chr7	+	57992500-57998097	2	No	No
BIG-lncRNA-789	BIG-lncRNA-789.1	chr7	+	58029368-58046798	2	No	No
BIG-lncRNA-790	BIG-lncRNA-790.1	chr7	-	61079274-61079870	2	No	No
BIG-lncRNA-791	BIG-lncRNA-791.1	chr7	-	61083660-61141088	2	No	No
BIG-lncRNA-792	BIG-lncRNA-792.1	chr7	+	61440577-61623900	2	No	No
BIG-lncRNA-793	BIG-lncRNA-793.1	chr7	+	63189473-63204021	2	No	No
BIG-lncRNA-794	BIG-lncRNA-794.1	chr7	+	65564604-65565067	2	No	No
BIG-lncRNA-795	BIG-lncRNA-795.1	chr7	+	69108392-69109715	2	No	No
BIG-lncRNA-796	BIG-lncRNA-796.1	chr7	+	69225227-69226636	2	No	No
BIG-lncRNA-797	BIG-lncRNA-797.1	chr7	+	69832974-69981923	2	No	No
BIG-lncRNA-798	BIG-lncRNA-798.1	chr7	+	69937369-69954538	4	Yes	No
BIG-lncRNA-799	BIG-lncRNA-799.1	chr7	+	69993106-69998847	2	Yes	No
BIG-lncRNA-800	BIG-lncRNA-800.1	chr7	+	70026340-70062238	2	No	No
BIG-lncRNA-801	BIG-lncRNA-801.1	chr7	+	70411566-70413677	2	No	No
BIG-lncRNA-802	BIG-lncRNA-802.1	chr7	-	72842300-72843010	2	No	No
BIG-lncRNA-803	BIG-lncRNA-803.1	chr7	-	76569885-76573965	2	No	No
BIG-lncRNA-804	BIG-lncRNA-804.1	chr7	-	78286272-78528162	2	No	No
BIG-lncRNA-805	BIG-lncRNA-805.1	chr7	-	78607091-78609216	2	No	No
BIG-lncRNA-806	BIG-lncRNA-806.1	chr7	-	78891475-78892936	2	No	No
BIG-lncRNA-807	BIG-lncRNA-807.1	chr7	-	86601950-86655767	16	Yes	No
BIG-lncRNA-808	BIG-lncRNA-808.1	chr7	+	92113704-92116408	2	No	No
BIG-lncRNA-809	BIG-lncRNA-809.1	chr7	-	93609573-93611624	2	No	No
BIG-lncRNA-810	BIG-lncRNA-810.1	chr7	+	95142366-95143688	2	No	No
BIG-lncRNA-811	BIG-lncRNA-811.1	chr7	+	98130640-98156439	2	No	No
BIG-lncRNA-812	BIG-lncRNA-812.1	chr7	+	99236574-99245548	5	Yes	Yes
BIG-lncRNA-813	BIG-lncRNA-813.1	chr7	+	99984476-99985564	2	No	No
BIG-lncRNA-814	BIG-lncRNA-814.1	chr7	-	100641564-100646043	2	No	No
BIG-lncRNA-815	BIG-lncRNA-815.1	chr7	+	102798229-102799243	2	No	No
BIG-lncRNA-816	BIG-lncRNA-816.1	chr7	+	102809739-102811304	2	No	No
BIG-lncRNA-817	BIG-lncRNA-817.1	chr7	+	104388364-104390006	2	No	No
BIG-lncRNA-818	BIG-lncRNA-818.1	chr7	-	104973743-105021393	27	Yes	Yes
BIG-lncRNA-818	BIG-lncRNA-818.2	chr7	-	104973743-105021393	24	Yes	Yes
BIG-lncRNA-819	BIG-lncRNA-819.1	chr7	-	106168416-106172192	2	No	No
BIG-lncRNA-820	BIG-lncRNA-820.1	chr7	-	109211798-109310703	2	No	No
BIG-lncRNA-821	BIG-lncRNA-821.1	chr7	-	109278499-109280513	2	No	No
BIG-lncRNA-822	BIG-lncRNA-822.1	chr7	-	111034963-111051821	3	Yes	No
BIG-lncRNA-822	BIG-lncRNA-822.2	chr7	-	111034963-111051783	3	Yes	No
BIG-lncRNA-822	BIG-lncRNA-822.3	chr7	-	111034963-111051735	7	Yes	No
BIG-lncRNA-822	BIG-lncRNA-822.4	chr7	-	111034963-111051810	7	Yes	No
BIG-lncRNA-822	BIG-lncRNA-822.5	chr7	-	111034963-111051145	7	Yes	No
BIG-lncRNA-822	BIG-lncRNA-822.6	chr7	-	111034963-111051810	3	Yes	No
BIG-lncRNA-822	BIG-lncRNA-822.7	chr7	-	111034963-111051145	3	Yes	No
BIG-lncRNA-822	BIG-lncRNA-822.8	chr7	-	111034963-111051821	7	Yes	No
BIG-lncRNA-822	BIG-lncRNA-822.9	chr7	-	111034963-111051735	3	Yes	No
BIG-lncRNA-822	BIG-lncRNA-822.10	chr7	-	111034963-111051783	7	Yes	No
BIG-lncRNA-823	BIG-lncRNA-823.1	chr7	-	111704850-111721165	4	Yes	No
BIG-lncRNA-823	BIG-lncRNA-823.2	chr7	-	111707321-111721128	4	Yes	No
BIG-lncRNA-823	BIG-lncRNA-823.3	chr7	-	111707321-111721909	4	Yes	No
BIG-lncRNA-823	BIG-lncRNA-823.4	chr7	-	111707321-111722017	4	Yes	No
BIG-lncRNA-823	BIG-lncRNA-823.5	chr7	-	111707321-111721981	4	Yes	No
BIG-lncRNA-823	BIG-lncRNA-823.6	chr7	-	111707321-111720523	4	Yes	No
BIG-lncRNA-823	BIG-lncRNA-823.7	chr7	-	111707321-111721165	4	Yes	No
BIG-lncRNA-823	BIG-lncRNA-823.8	chr7	-	111709607-111722017	4	Yes	No
BIG-lncRNA-823	BIG-lncRNA-823.9	chr7	-	111709607-111721909	4	Yes	No
BIG-lncRNA-823	BIG-lncRNA-823.10	chr7	-	111709607-111721128	4	Yes	No
BIG-lncRNA-823	BIG-lncRNA-823.11	chr7	-	111709607-111720523	4	Yes	No
BIG-lncRNA-823	BIG-lncRNA-823.12	chr7	-	111709607-111721165	4	Yes	No
BIG-lncRNA-823	BIG-lncRNA-823.13	chr7	-	111709607-111721981	4	Yes	No
BIG-lncRNA-823	BIG-lncRNA-823.14	chr7	-	111714428-111721128	4	Yes	No
BIG-lncRNA-823	BIG-lncRNA-823.15	chr7	-	111714428-111721165	4	Yes	No
BIG-lncRNA-823	BIG-lncRNA-823.16	chr7	-	111714428-111722017	4	Yes	No
BIG-lncRNA-823	BIG-lncRNA-823.17	chr7	-	111714428-111720523	4	Yes	No
BIG-lncRNA-823	BIG-lncRNA-823.18	chr7	-	111714428-111721909	4	Yes	No
BIG-lncRNA-823	BIG-lncRNA-823.19	chr7	-	111714428-111721981	4	Yes	No
BIG-lncRNA-823	BIG-lncRNA-823.20	chr7	-	111715181-111720523	4	Yes	No
BIG-lncRNA-823	BIG-lncRNA-823.21	chr7	-	111715181-111721909	4	Yes	No
BIG-lncRNA-823	BIG-lncRNA-823.22	chr7	-	111715181-111721165	4	Yes	No
BIG-lncRNA-823	BIG-lncRNA-823.23	chr7	-	111715181-111721128	4	Yes	No
BIG-lncRNA-823	BIG-lncRNA-823.24	chr7	-	111715181-111721981	4	Yes	No
BIG-lncRNA-823	BIG-lncRNA-823.25	chr7	-	111715181-111722017	4	Yes	No
BIG-lncRNA-824	BIG-lncRNA-824.1	chr7	-	111722086-111724618	2	Yes	No
BIG-lncRNA-824	BIG-lncRNA-824.2	chr7	-	111722086-111724257	2	Yes	No
BIG-lncRNA-824	BIG-lncRNA-824.3	chr7	-	111722086-111724273	2	Yes	No
BIG-lncRNA-824	BIG-lncRNA-824.4	chr7	-	111722086-111724577	2	Yes	No
BIG-lncRNA-824	BIG-lncRNA-824.5	chr7	-	111722086-111724638	2	Yes	No
BIG-lncRNA-824	BIG-lncRNA-824.6	chr7	-	111722086-111724528	2	Yes	No
BIG-lncRNA-825	BIG-lncRNA-825.1	chr7	-	111725018-111726637	2	Yes	No
BIG-lncRNA-825	BIG-lncRNA-825.2	chr7	-	111725018-111726616	2	Yes	No
BIG-lncRNA-826	BIG-lncRNA-826.1	chr7	-	111726685-111729737	2	Yes	No
BIG-lncRNA-827	BIG-lncRNA-827.1	chr7	-	111731351-111743395	8	Yes	No
BIG-lncRNA-827	BIG-lncRNA-827.2	chr7	-	111739020-111743395	2	Yes	No
BIG-lncRNA-828	BIG-lncRNA-828.1	chr7	-	111793134-111799669	5	Yes	No
BIG-lncRNA-828	BIG-lncRNA-828.2	chr7	-	111793134-111799669	4	Yes	No
BIG-lncRNA-829	BIG-lncRNA-829.1	chr7	-	111822438-111825658	4	Yes	No
BIG-lncRNA-829	BIG-lncRNA-829.2	chr7	-	111822438-111825658	3	Yes	No
BIG-lncRNA-829	BIG-lncRNA-829.3	chr7	-	111824650-111838023	8	Yes	No
BIG-lncRNA-829	BIG-lncRNA-829.4	chr7	-	111824650-111837349	8	Yes	No
BIG-lncRNA-830	BIG-lncRNA-830.1	chr7	-	111838306-111840562	2	Yes	No
BIG-lncRNA-830	BIG-lncRNA-830.2	chr7	-	111838306-111840774	2	Yes	No
BIG-lncRNA-831	BIG-lncRNA-831.1	chr7	-	111840787-111845491	3	Yes	No
BIG-lncRNA-832	BIG-lncRNA-832.1	chr7	+	112580158-112617955	2	No	No
BIG-lncRNA-833	BIG-lncRNA-833.1	chr7	-	119209043-119212352	2	No	No
BIG-lncRNA-834	BIG-lncRNA-834.1	chr7	-	119350637-119353810	1	Yes	Yes
BIG-lncRNA-835	BIG-lncRNA-835.1	chr7	+	119795895-120013856	2	No	No
BIG-lncRNA-836	BIG-lncRNA-836.1	chr7	+	119953813-119968700	3	Yes	No
BIG-lncRNA-837	BIG-lncRNA-837.1	chr7	+	119980154-119986453	2	Yes	No
BIG-lncRNA-837	BIG-lncRNA-837.2	chr7	+	119980154-119987535	2	Yes	No
BIG-lncRNA-838	BIG-lncRNA-838.1	chr7	+	119989005-119992400	3	Yes	No
BIG-lncRNA-838	BIG-lncRNA-838.2	chr7	+	119999941-120012475	5	Yes	No
BIG-lncRNA-839	BIG-lncRNA-839.1	chr7	-	122908800-122911061	2	No	No
BIG-lncRNA-840	BIG-lncRNA-840.1	chr7	-	126296883-126299168	2	No	No
BIG-lncRNA-841	BIG-lncRNA-841.1	chr7	-	130588082-130596146	2	Yes	Yes
BIG-lncRNA-842	BIG-lncRNA-842.1	chr7	-	130729709-130733255	2	Yes	No
BIG-lncRNA-842	BIG-lncRNA-842.2	chr7	-	130729709-130732813	2	Yes	No
BIG-lncRNA-843	BIG-lncRNA-843.1	chr7	-	130733281-130736106	2	Yes	No
BIG-lncRNA-844	BIG-lncRNA-844.1	chr7	-	130755301-130762808	3	Yes	No
BIG-lncRNA-844	BIG-lncRNA-844.2	chr7	-	130755301-130761950	3	Yes	No
BIG-lncRNA-844	BIG-lncRNA-844.3	chr7	-	130757374-130761950	3	Yes	No
BIG-lncRNA-844	BIG-lncRNA-844.4	chr7	-	130757374-130762808	3	Yes	No
BIG-lncRNA-844	BIG-lncRNA-844.5	chr7	-	130759043-130761950	2	Yes	No
BIG-lncRNA-844	BIG-lncRNA-844.6	chr7	-	130759043-130762808	2	Yes	No
BIG-lncRNA-845	BIG-lncRNA-845.1	chr7	-	130777318-130780876	3	Yes	No
BIG-lncRNA-846	BIG-lncRNA-846.1	chr7	+	131271358-131272514	2	Yes	No
BIG-lncRNA-846	BIG-lncRNA-846.2	chr7	+	131271378-131272514	2	Yes	No
BIG-lncRNA-847	BIG-lncRNA-847.1	chr7	-	134329279-134331336	1	Yes	Yes
BIG-lncRNA-847	BIG-lncRNA-847.2	chr7	-	134329280-134331336	1	Yes	Yes
BIG-lncRNA-848	BIG-lncRNA-848.1	chr7	+	136134025-136135026	2	No	No
BIG-lncRNA-849	BIG-lncRNA-849.1	chr7	-	137466711-137467703	2	No	No
BIG-lncRNA-850	BIG-lncRNA-850.1	chr7	+	138017474-138051584	2	No	No
BIG-lncRNA-851	BIG-lncRNA-851.1	chr7	+	145678962-145684518	2	No	Yes
BIG-lncRNA-852	BIG-lncRNA-852.1	chr7	-	146887725-146997661	4	No	No
BIG-lncRNA-853	BIG-lncRNA-853.1	chr7	-	151095145-151095789	2	No	No
BIG-lncRNA-854	BIG-lncRNA-854.1	chr7	-	153029818-153033378	2	No	No
BIG-lncRNA-855	BIG-lncRNA-855.1	chr7	+	153818170-153820140	2	No	No
BIG-lncRNA-856	BIG-lncRNA-856.1	chr7	+	153820516-153821261	2	No	No
BIG-lncRNA-857	BIG-lncRNA-857.1	chr7	-	155584321-155589104	2	No	No
BIG-lncRNA-858	BIG-lncRNA-858.1	chr7	-	156363623-156365794	2	No	No
BIG-lncRNA-859	BIG-lncRNA-859.1	chr7	+	157274057-157275789	2	No	No
BIG-lncRNA-860	BIG-lncRNA-860.1	chr7	+	157274135-157274910	2	No	No
BIG-lncRNA-861	BIG-lncRNA-861.1	chr7	-	158313942-158315403	2	No	No
BIG-lncRNA-862	BIG-lncRNA-862.1	chr8	-	270095-270422	2	No	No
BIG-lncRNA-863	BIG-lncRNA-863.1	chr8	+	324384-325705	3	No	No
BIG-lncRNA-864	BIG-lncRNA-864.1	chr8	-	695536-696243	2	No	No
BIG-lncRNA-865	BIG-lncRNA-865.1	chr8	+	1231512-1232740	4	No	No
BIG-lncRNA-866	BIG-lncRNA-866.1	chr8	+	1236710-1237164	2	No	No
BIG-lncRNA-867	BIG-lncRNA-867.1	chr8	+	1321479-1324278	2	Yes	No
BIG-lncRNA-868	BIG-lncRNA-868.1	chr8	-	2495738-2497975	2	No	No
BIG-lncRNA-869	BIG-lncRNA-869.1	chr8	-	4738513-4769643	14	Yes	No
BIG-lncRNA-870	BIG-lncRNA-870.1	chr8	-	4769655-4812274	21	Yes	No
BIG-lncRNA-871	BIG-lncRNA-871.1	chr8	-	5627659-5744278	2	No	No
BIG-lncRNA-872	BIG-lncRNA-872.1	chr8	-	7068480-7069345	2	No	No
BIG-lncRNA-873	BIG-lncRNA-873.1	chr8	-	8504089-8505190	2	No	No
BIG-lncRNA-874	BIG-lncRNA-874.1	chr8	-	8916244-8923973	1	Yes	Yes
BIG-lncRNA-875	BIG-lncRNA-875.1	chr8	-	9733570-9742097	2	No	No
BIG-lncRNA-876	BIG-lncRNA-876.1	chr8	-	11801994-11804873	2	No	No
BIG-lncRNA-877	BIG-lncRNA-877.1	chr8	+	12021733-12023297	2	No	No
BIG-lncRNA-878	BIG-lncRNA-878.1	chr8	+	19052273-19054204	2	No	No
BIG-lncRNA-879	BIG-lncRNA-879.1	chr8	+	22084785-22087637	2	No	No
BIG-lncRNA-880	BIG-lncRNA-880.1	chr8	+	22561222-22756017	2	Yes	No
BIG-lncRNA-881	BIG-lncRNA-881.1	chr8	+	22640137-22641376	2	No	No
BIG-lncRNA-882	BIG-lncRNA-882.1	chr8	+	29341747-29343064	2	No	No
BIG-lncRNA-883	BIG-lncRNA-883.1	chr8	-	30871977-30874090	1	Yes	Yes
BIG-lncRNA-884	BIG-lncRNA-884.1	chr8	+	31941437-31943212	2	No	No
BIG-lncRNA-885	BIG-lncRNA-885.1	chr8	+	33792687-33797971	2	Yes	No
BIG-lncRNA-886	BIG-lncRNA-886.1	chr8	+	35126276-35129042	2	No	No
BIG-lncRNA-887	BIG-lncRNA-887.1	chr8	+	35159584-35160513	2	No	No
BIG-lncRNA-888	BIG-lncRNA-888.1	chr8	+	38632990-38635547	2	No	No
BIG-lncRNA-889	BIG-lncRNA-889.1	chr8	-	40469349-40470469	2	No	No
BIG-lncRNA-890	BIG-lncRNA-890.1	chr8	-	40772106-40794251	2	No	No
BIG-lncRNA-891	BIG-lncRNA-891.1	chr8	+	43092912-43093590	2	Yes	No
BIG-lncRNA-892	BIG-lncRNA-892.1	chr8	-	43760287-43822118	2	No	No
BIG-lncRNA-893	BIG-lncRNA-893.1	chr8	-	46888318-46891538	3	No	No
BIG-lncRNA-894	BIG-lncRNA-894.1	chr8	+	48077769-48142142	2	No	No
BIG-lncRNA-895	BIG-lncRNA-895.1	chr8	-	49697412-49706280	2	No	No
BIG-lncRNA-896	BIG-lncRNA-896.1	chr8	+	54572919-54627070	4	No	No
BIG-lncRNA-897	BIG-lncRNA-897.1	chr8	+	60715153-60883490	3	No	No
BIG-lncRNA-898	BIG-lncRNA-898.1	chr8	+	61871439-61873421	2	No	No
BIG-lncRNA-899	BIG-lncRNA-899.1	chr8	+	64075911-64076160	1	Yes	Yes
BIG-lncRNA-900	BIG-lncRNA-900.1	chr8	+	69885321-69891073	2	No	No
BIG-lncRNA-901	BIG-lncRNA-901.1	chr8	+	70271036-70285324	3	No	Yes
BIG-lncRNA-902	BIG-lncRNA-902.1	chr8	+	70277104-70378529	2	No	No
BIG-lncRNA-902	BIG-lncRNA-902.2	chr8	+	70279411-70285324	4	No	Yes
BIG-lncRNA-903	BIG-lncRNA-903.1	chr8	-	70602372-70602604	1	Yes	Yes
BIG-lncRNA-903	BIG-lncRNA-903.2	chr8	-	70602373-70602604	1	Yes	Yes
BIG-lncRNA-904	BIG-lncRNA-904.1	chr8	-	72719956-72752943	2	No	No
BIG-lncRNA-905	BIG-lncRNA-905.1	chr8	+	72836609-72866469	6	Yes	Yes
BIG-lncRNA-905	BIG-lncRNA-905.2	chr8	+	72836626-72866469	6	Yes	Yes
BIG-lncRNA-906	BIG-lncRNA-906.1	chr8	+	75356482-75362693	4	No	Yes
BIG-lncRNA-907	BIG-lncRNA-907.1	chr8	-	76124606-76127294	2	No	No
BIG-lncRNA-908	BIG-lncRNA-908.1	chr8	+	86240801-86287537	8	Yes	No
BIG-lncRNA-909	BIG-lncRNA-909.1	chr8	-	89482849-89497940	2	No	No
BIG-lncRNA-910	BIG-lncRNA-910.1	chr8	-	92540366-92540912	2	No	No
BIG-lncRNA-911	BIG-lncRNA-911.1	chr8	+	92717754-92964813	2	No	No
BIG-lncRNA-912	BIG-lncRNA-912.1	chr8	-	93057512-93066352	3	Yes	No
BIG-lncRNA-913	BIG-lncRNA-913.1	chr8	-	95292856-95357004	2	No	No
BIG-lncRNA-914	BIG-lncRNA-914.1	chr8	+	96097873-96103082	2	No	No
BIG-lncRNA-915	BIG-lncRNA-915.1	chr8	+	101749710-101758204	2	No	No
BIG-lncRNA-916	BIG-lncRNA-916.1	chr8	+	102664404-102664843	2	No	No
BIG-lncRNA-917	BIG-lncRNA-917.1	chr8	-	103075702-103093772	4	Yes	No
BIG-lncRNA-918	BIG-lncRNA-918.1	chr8	+	103992237-103997953	2	Yes	No
BIG-lncRNA-919	BIG-lncRNA-919.1	chr8	+	104795075-104795487	2	No	No
BIG-lncRNA-920	BIG-lncRNA-920.1	chr8	+	106336097-106340898	2	No	Yes
BIG-lncRNA-921	BIG-lncRNA-921.1	chr8	+	106468408-106469497	1	Yes	Yes
BIG-lncRNA-922	BIG-lncRNA-922.1	chr8	-	116552550-116561897	7	Yes	No
BIG-lncRNA-922	BIG-lncRNA-922.2	chr8	-	116557208-116561897	4	Yes	No
BIG-lncRNA-923	BIG-lncRNA-923.1	chr8	-	117892149-118047175	2	No	No
BIG-lncRNA-924	BIG-lncRNA-924.1	chr8	+	119964501-119965513	1	Yes	Yes
BIG-lncRNA-924	BIG-lncRNA-924.2	chr8	+	119964502-119965513	1	Yes	Yes
BIG-lncRNA-925	BIG-lncRNA-925.1	chr8	+	123124103-123150977	2	No	No
BIG-lncRNA-926	BIG-lncRNA-926.1	chr8	+	124469805-124470988	2	No	No
BIG-lncRNA-927	BIG-lncRNA-927.1	chr8	+	128099680-128100819	2	No	No
BIG-lncRNA-928	BIG-lncRNA-928.1	chr8	+	128914687-128928795	5	Yes	No
BIG-lncRNA-929	BIG-lncRNA-929.1	chr8	+	129926916-129932580	2	No	No
BIG-lncRNA-930	BIG-lncRNA-930.1	chr8	+	132598941-132834514	2	No	No
BIG-lncRNA-931	BIG-lncRNA-931.1	chr8	-	133476281-133477241	2	No	No
BIG-lncRNA-932	BIG-lncRNA-932.1	chr8	-	136779732-136780182	3	No	No
BIG-lncRNA-933	BIG-lncRNA-933.1	chr8	-	137814232-137878174	2	No	No
BIG-lncRNA-934	BIG-lncRNA-934.1	chr8	-	142291453-142316045	9	Yes	No
BIG-lncRNA-934	BIG-lncRNA-934.2	chr8	-	142292653-142316045	9	Yes	No
BIG-lncRNA-934	BIG-lncRNA-934.3	chr8	-	142294158-142316045	9	Yes	No
BIG-lncRNA-934	BIG-lncRNA-934.4	chr8	-	142295868-142316045	9	Yes	No
BIG-lncRNA-934	BIG-lncRNA-934.5	chr8	-	142298021-142316045	9	Yes	No
BIG-lncRNA-935	BIG-lncRNA-935.1	chr8	-	146124926-146125690	1	Yes	Yes
BIG-lncRNA-935	BIG-lncRNA-935.2	chr8	-	146125237-146125690	1	Yes	Yes
BIG-lncRNA-936	BIG-lncRNA-936.1	chr9	+	532390-545685	2	Yes	No
BIG-lncRNA-937	BIG-lncRNA-937.1	chr9	+	569460-593152	11	Yes	No
BIG-lncRNA-937	BIG-lncRNA-937.2	chr9	+	569460-587125	5	Yes	No
BIG-lncRNA-937	BIG-lncRNA-937.3	chr9	+	569490-587125	5	Yes	No
BIG-lncRNA-937	BIG-lncRNA-937.4	chr9	+	569490-593152	11	Yes	No
BIG-lncRNA-937	BIG-lncRNA-937.5	chr9	+	569501-587125	5	Yes	No
BIG-lncRNA-937	BIG-lncRNA-937.6	chr9	+	569501-593152	11	Yes	No
BIG-lncRNA-938	BIG-lncRNA-938.1	chr9	+	637524-642868	2	Yes	No
BIG-lncRNA-939	BIG-lncRNA-939.1	chr9	-	2472308-2476026	2	No	No
BIG-lncRNA-940	BIG-lncRNA-940.1	chr9	-	2711551-2715510	2	No	No
BIG-lncRNA-941	BIG-lncRNA-941.1	chr9	-	3490511-3522042	10	Yes	No
BIG-lncRNA-941	BIG-lncRNA-941.2	chr9	-	3490511-3522042	20	Yes	No
BIG-lncRNA-941	BIG-lncRNA-941.3	chr9	-	3490511-3522042	14	Yes	No
BIG-lncRNA-941	BIG-lncRNA-941.4	chr9	-	3490851-3522042	12	Yes	No
BIG-lncRNA-941	BIG-lncRNA-941.5	chr9	-	3490851-3522042	13	Yes	No
BIG-lncRNA-941	BIG-lncRNA-941.6	chr9	-	3490851-3522042	13	Yes	No
BIG-lncRNA-942	BIG-lncRNA-942.1	chr9	-	4210993-4228197	10	Yes	No
BIG-lncRNA-943	BIG-lncRNA-943.1	chr9	+	4881612-4883935	2	No	No
BIG-lncRNA-944	BIG-lncRNA-944.1	chr9	-	6756871-6757867	1	Yes	Yes
BIG-lncRNA-944	BIG-lncRNA-944.2	chr9	-	6756871-6757558	1	Yes	Yes
BIG-lncRNA-945	BIG-lncRNA-945.1	chr9	+	12836199-12846605	3	No	Yes
BIG-lncRNA-946	BIG-lncRNA-946.1	chr9	-	14236127-14238150	2	Yes	No
BIG-lncRNA-947	BIG-lncRNA-947.1	chr9	-	14465431-14490063	2	No	No
BIG-lncRNA-948	BIG-lncRNA-948.1	chr9	-	15297915-15299759	1	Yes	Yes
BIG-lncRNA-949	BIG-lncRNA-949.1	chr9	+	21907070-21909234	2	No	No
BIG-lncRNA-950	BIG-lncRNA-950.1	chr9	-	22164884-22348989	2	No	No
BIG-lncRNA-951	BIG-lncRNA-951.1	chr9	+	22310279-22314923	2	No	No
BIG-lncRNA-952	BIG-lncRNA-952.1	chr9	+	22377323-22384480	2	No	Yes
BIG-lncRNA-953	BIG-lncRNA-953.1	chr9	-	22658802-22663588	2	No	No
BIG-lncRNA-954	BIG-lncRNA-954.1	chr9	-	27589086-27590740	2	Yes	No
BIG-lncRNA-954	BIG-lncRNA-954.2	chr9	-	27589086-27591209	2	Yes	No
BIG-lncRNA-955	BIG-lncRNA-955.1	chr9	-	27972181-27981531	5	Yes	No
BIG-lncRNA-956	BIG-lncRNA-956.1	chr9	-	28801873-29038669	57	Yes	Yes
BIG-lncRNA-956	BIG-lncRNA-956.2	chr9	-	28801873-29038669	57	Yes	Yes
BIG-lncRNA-957	BIG-lncRNA-957.1	chr9	+	32186983-32187908	2	No	No
BIG-lncRNA-958	BIG-lncRNA-958.1	chr9	+	32285119-32285886	2	No	No
BIG-lncRNA-959	BIG-lncRNA-959.1	chr9	+	33609687-33614523	2	No	Yes
BIG-lncRNA-959	BIG-lncRNA-959.2	chr9	+	33609687-33615372	3	No	No
BIG-lncRNA-960	BIG-lncRNA-960.1	chr9	+	33634021-33658316	2	No	No
BIG-lncRNA-961	BIG-lncRNA-961.1	chr9	-	35470410-35473384	2	No	No
BIG-lncRNA-962	BIG-lncRNA-962.1	chr9	-	35490954-35491624	2	Yes	No
BIG-lncRNA-963	BIG-lncRNA-963.1	chr9	+	37209348-37218349	7	Yes	No
BIG-lncRNA-964	BIG-lncRNA-964.1	chr9	-	39551677-39552327	2	No	No
BIG-lncRNA-965	BIG-lncRNA-965.1	chr9	+	39567255-39594768	4	No	No
BIG-lncRNA-965	BIG-lncRNA-965.2	chr9	+	39567308-39594768	3	No	No
BIG-lncRNA-966	BIG-lncRNA-966.1	chr9	+	40852683-40865210	2	No	No
BIG-lncRNA-967	BIG-lncRNA-967.1	chr9	-	40868431-40880439	2	No	No
BIG-lncRNA-968	BIG-lncRNA-968.1	chr9	+	40895122-40904168	2	No	No
BIG-lncRNA-969	BIG-lncRNA-969.1	chr9	+	41003238-41011633	2	No	No
BIG-lncRNA-970	BIG-lncRNA-970.1	chr9	+	41062526-41075849	3	No	No
BIG-lncRNA-971	BIG-lncRNA-971.1	chr9	-	41099529-41266941	2	No	No
BIG-lncRNA-972	BIG-lncRNA-972.1	chr9	-	41817651-41826171	2	No	No
BIG-lncRNA-973	BIG-lncRNA-973.1	chr9	+	41874094-41885958	2	No	No
BIG-lncRNA-974	BIG-lncRNA-974.1	chr9	-	42102691-42106819	2	No	No
BIG-lncRNA-975	BIG-lncRNA-975.1	chr9	-	42119191-42120792	2	No	No
BIG-lncRNA-976	BIG-lncRNA-976.1	chr9	+	42359248-42361759	2	No	No
BIG-lncRNA-977	BIG-lncRNA-977.1	chr9	+	43374031-43383211	2	No	No
BIG-lncRNA-978	BIG-lncRNA-978.1	chr9	-	44017380-44018418	2	No	No
BIG-lncRNA-979	BIG-lncRNA-979.1	chr9	-	44157462-44243038	2	No	No
BIG-lncRNA-980	BIG-lncRNA-980.1	chr9	-	44393182-44393663	2	No	No
BIG-lncRNA-981	BIG-lncRNA-981.1	chr9	-	44471544-44481197	2	No	No
BIG-lncRNA-982	BIG-lncRNA-982.1	chr9	-	44506155-44506618	2	No	No
BIG-lncRNA-983	BIG-lncRNA-983.1	chr9	-	44813426-44814395	2	No	No
BIG-lncRNA-984	BIG-lncRNA-984.1	chr9	+	45570339-45572871	2	No	No
BIG-lncRNA-985	BIG-lncRNA-985.1	chr9	+	45755237-45755894	2	No	No
BIG-lncRNA-986	BIG-lncRNA-986.1	chr9	+	46119020-46122317	2	No	No
BIG-lncRNA-987	BIG-lncRNA-987.1	chr9	-	46202362-46302282	2	No	No
BIG-lncRNA-988	BIG-lncRNA-988.1	chr9	+	46585812-46588348	2	No	No
BIG-lncRNA-989	BIG-lncRNA-989.1	chr9	+	46600219-46604347	2	No	No
BIG-lncRNA-990	BIG-lncRNA-990.1	chr9	+	46972584-46981218	2	No	No
BIG-lncRNA-991	BIG-lncRNA-991.1	chr9	-	46982628-46987321	2	No	No
BIG-lncRNA-992	BIG-lncRNA-992.1	chr9	+	65915380-65917005	2	No	No
BIG-lncRNA-993	BIG-lncRNA-993.1	chr9	-	66544202-66545798	2	No	No
BIG-lncRNA-994	BIG-lncRNA-994.1	chr9	-	66790240-66791168	2	No	No
BIG-lncRNA-995	BIG-lncRNA-995.1	chr9	-	66792216-66793420	2	No	No
BIG-lncRNA-996	BIG-lncRNA-996.1	chr9	+	66806978-66833908	2	No	No
BIG-lncRNA-997	BIG-lncRNA-997.1	chr9	-	66810578-66825900	2	No	No
BIG-lncRNA-998	BIG-lncRNA-998.1	chr9	-	66943745-66947051	2	No	No
BIG-lncRNA-999	BIG-lncRNA-999.1	chr9	+	66985259-66997483	2	No	No
BIG-lncRNA-1000	BIG-lncRNA-1000.1	chr9	-	67099577-67268922	2	No	No
BIG-lncRNA-1001	BIG-lncRNA-1001.1	chr9	-	67678352-67679798	2	No	No
BIG-lncRNA-1002	BIG-lncRNA-1002.1	chr9	+	67896947-68157266	4	No	No
BIG-lncRNA-1003	BIG-lncRNA-1003.1	chr9	-	67969700-67972039	2	No	No
BIG-lncRNA-1004	BIG-lncRNA-1004.1	chr9	-	68240228-68241435	2	No	No
BIG-lncRNA-1005	BIG-lncRNA-1005.1	chr9	-	68247438-68251654	2	No	No
BIG-lncRNA-1006	BIG-lncRNA-1006.1	chr9	-	68827434-68830920	2	No	No
BIG-lncRNA-1007	BIG-lncRNA-1007.1	chr9	-	68836322-68838108	3	No	No
BIG-lncRNA-1007	BIG-lncRNA-1007.2	chr9	-	68836322-68838109	2	No	No
BIG-lncRNA-1008	BIG-lncRNA-1008.1	chr9	-	69165352-69168829	2	No	No
BIG-lncRNA-1009	BIG-lncRNA-1009.1	chr9	-	69693562-69694865	2	No	No
BIG-lncRNA-1010	BIG-lncRNA-1010.1	chr9	+	69785895-69786961	2	No	No
BIG-lncRNA-1011	BIG-lncRNA-1011.1	chr9	-	70008043-70010263	2	No	No
BIG-lncRNA-1012	BIG-lncRNA-1012.1	chr9	+	76299362-76342976	2	No	No
BIG-lncRNA-1013	BIG-lncRNA-1013.1	chr9	-	76479494-76481623	2	No	No
BIG-lncRNA-1014	BIG-lncRNA-1014.1	chr9	+	78165545-78176698	2	No	No
BIG-lncRNA-1015	BIG-lncRNA-1015.1	chr9	+	79318494-79326411	3	Yes	No
BIG-lncRNA-1016	BIG-lncRNA-1016.1	chr9	+	81496650-81498344	2	Yes	No
BIG-lncRNA-1017	BIG-lncRNA-1017.1	chr9	+	81498490-81508758	7	Yes	No
BIG-lncRNA-1018	BIG-lncRNA-1018.1	chr9	-	82056202-82161159	2	No	No
BIG-lncRNA-1019	BIG-lncRNA-1019.1	chr9	+	82757123-82757817	2	No	No
BIG-lncRNA-1020	BIG-lncRNA-1020.1	chr9	-	84326740-84401179	2	No	No
BIG-lncRNA-1021	BIG-lncRNA-1021.1	chr9	-	92098071-92100021	2	Yes	No
BIG-lncRNA-1022	BIG-lncRNA-1022.1	chr9	-	93696088-93893849	2	Yes	No
BIG-lncRNA-1023	BIG-lncRNA-1023.1	chr9	-	93934231-93955249	2	Yes	No
BIG-lncRNA-1023	BIG-lncRNA-1023.2	chr9	-	93934231-93956067	2	Yes	No
BIG-lncRNA-1023	BIG-lncRNA-1023.3	chr9	-	93934231-93955997	2	Yes	No
BIG-lncRNA-1023	BIG-lncRNA-1023.4	chr9	-	93955057-93958094	3	No	No
BIG-lncRNA-1023	BIG-lncRNA-1023.5	chr9	-	93955057-93959381	3	No	No
BIG-lncRNA-1024	BIG-lncRNA-1024.1	chr9	+	94457813-94473521	2	No	No
BIG-lncRNA-1025	BIG-lncRNA-1025.1	chr9	+	95932657-95935245	2	No	No
BIG-lncRNA-1026	BIG-lncRNA-1026.1	chr9	-	97251934-97253707	2	Yes	No
BIG-lncRNA-1027	BIG-lncRNA-1027.1	chr9	+	98577634-98579264	2	Yes	No
BIG-lncRNA-1028	BIG-lncRNA-1028.1	chr9	-	101948315-101950065	2	No	No
BIG-lncRNA-1029	BIG-lncRNA-1029.1	chr9	-	105247753-105248812	1	Yes	Yes
BIG-lncRNA-1030	BIG-lncRNA-1030.1	chr9	-	105864401-105967496	3	No	No
BIG-lncRNA-1031	BIG-lncRNA-1031.1	chr9	+	105873787-105968891	2	No	No
BIG-lncRNA-1032	BIG-lncRNA-1032.1	chr9	-	107468214-107478961	2	No	No
BIG-lncRNA-1033	BIG-lncRNA-1033.1	chr9	+	113341579-113343657	1	Yes	Yes
BIG-lncRNA-1034	BIG-lncRNA-1034.1	chr9	+	116177513-116180089	2	No	No
BIG-lncRNA-1035	BIG-lncRNA-1035.1	chr9	-	119169217-119181032	2	No	Yes
BIG-lncRNA-1036	BIG-lncRNA-1036.1	chr9	-	121250177-121252792	2	No	No
BIG-lncRNA-1037	BIG-lncRNA-1037.1	chr9	+	123980126-123983183	2	No	No
BIG-lncRNA-1038	BIG-lncRNA-1038.1	chr9	-	127472478-127473465	1	Yes	Yes
BIG-lncRNA-1039	BIG-lncRNA-1039.1	chr9	-	127520186-127532759	2	Yes	No
BIG-lncRNA-1040	BIG-lncRNA-1040.1	chr9	-	127630507-127631316	1	Yes	Yes
BIG-lncRNA-1041	BIG-lncRNA-1041.1	chr9	+	135415132-135429244	2	No	No
BIG-lncRNA-1042	BIG-lncRNA-1042.1	chr9	-	137145716-137146200	2	No	No
BIG-lncRNA-1043	BIG-lncRNA-1043.1	chr9	-	139728719-139729380	1	Yes	Yes
BIG-lncRNA-1043	BIG-lncRNA-1043.2	chr9	-	139728741-139729380	1	Yes	Yes
BIG-lncRNA-1043	BIG-lncRNA-1043.3	chr9	-	139728759-139729380	1	Yes	Yes
BIG-lncRNA-1044	BIG-lncRNA-1044.1	chr9	+	140843371-140843959	2	No	No
BIG-lncRNA-1045	BIG-lncRNA-1045.1	chr9	+	141099127-141099570	2	No	No
BIG-lncRNA-1046	BIG-lncRNA-1046.1	chr10	-	1460578-1476798	2	No	No
BIG-lncRNA-1047	BIG-lncRNA-1047.1	chr10	-	2935792-3024656	2	No	No
BIG-lncRNA-1048	BIG-lncRNA-1048.1	chr10	+	4966595-4974202	2	No	No
BIG-lncRNA-1049	BIG-lncRNA-1049.1	chr10	-	5293997-5294652	2	No	No
BIG-lncRNA-1050	BIG-lncRNA-1050.1	chr10	+	5333989-5335546	1	Yes	Yes
BIG-lncRNA-1050	BIG-lncRNA-1050.2	chr10	+	5334584-5335546	1	Yes	Yes
BIG-lncRNA-1050	BIG-lncRNA-1050.3	chr10	+	5334635-5335546	1	Yes	Yes
BIG-lncRNA-1051	BIG-lncRNA-1051.1	chr10	+	6205815-6208480	2	Yes	Yes
BIG-lncRNA-1051	BIG-lncRNA-1051.2	chr10	+	6205816-6208480	1	Yes	Yes
BIG-lncRNA-1052	BIG-lncRNA-1052.1	chr10	+	6321906-6338582	2	No	No
BIG-lncRNA-1053	BIG-lncRNA-1053.1	chr10	+	6407985-6418989	2	No	No
BIG-lncRNA-1054	BIG-lncRNA-1054.1	chr10	+	6426264-6432719	3	Yes	No
BIG-lncRNA-1054	BIG-lncRNA-1054.2	chr10	+	6426264-6434151	2	Yes	No
BIG-lncRNA-1055	BIG-lncRNA-1055.1	chr10	-	11769947-11779438	2	No	No
BIG-lncRNA-1056	BIG-lncRNA-1056.1	chr10	-	12059256-12066928	1	Yes	Yes
BIG-lncRNA-1057	BIG-lncRNA-1057.1	chr10	-	14041106-14042428	2	No	No
BIG-lncRNA-1058	BIG-lncRNA-1058.1	chr10	-	16224041-16380171	2	No	No
BIG-lncRNA-1059	BIG-lncRNA-1059.1	chr10	+	20058362-20058716	2	No	No
BIG-lncRNA-1060	BIG-lncRNA-1060.1	chr10	+	20804739-20842471	2	No	No
BIG-lncRNA-1061	BIG-lncRNA-1061.1	chr10	+	21815500-21815797	1	Yes	Yes
BIG-lncRNA-1062	BIG-lncRNA-1062.1	chr10	-	25946188-26058199	2	No	No
BIG-lncRNA-1063	BIG-lncRNA-1063.1	chr10	+	28034453-28037534	1	Yes	Yes
BIG-lncRNA-1063	BIG-lncRNA-1063.2	chr10	+	28034453-28038765	1	Yes	Yes
BIG-lncRNA-1064	BIG-lncRNA-1064.1	chr10	-	28817747-28820521	1	Yes	Yes
BIG-lncRNA-1065	BIG-lncRNA-1065.1	chr10	-	29387230-29388597	2	No	No
BIG-lncRNA-1066	BIG-lncRNA-1066.1	chr10	-	31355211-31360693	2	No	No
BIG-lncRNA-1067	BIG-lncRNA-1067.1	chr10	-	33039144-33050946	2	No	No
BIG-lncRNA-1068	BIG-lncRNA-1068.1	chr10	-	37874126-38042747	2	No	No
BIG-lncRNA-1069	BIG-lncRNA-1069.1	chr10	+	42358394-42362985	2	No	No
BIG-lncRNA-1070	BIG-lncRNA-1070.1	chr10	-	42397928-42430887	4	No	No
BIG-lncRNA-1071	BIG-lncRNA-1071.1	chr10	-	42398506-42401520	2	No	No
BIG-lncRNA-1072	BIG-lncRNA-1072.1	chr10	+	42527243-42532914	3	No	No
BIG-lncRNA-1073	BIG-lncRNA-1073.1	chr10	+	42527976-42532633	2	No	No
BIG-lncRNA-1074	BIG-lncRNA-1074.1	chr10	-	43408982-43422655	3	No	No
BIG-lncRNA-1075	BIG-lncRNA-1075.1	chr10	+	43556873-43558320	2	No	No
BIG-lncRNA-1076	BIG-lncRNA-1076.1	chr10	-	43918063-43918775	2	No	No
BIG-lncRNA-1077	BIG-lncRNA-1077.1	chr10	-	47057816-47061083	2	No	No
BIG-lncRNA-1078	BIG-lncRNA-1078.1	chr10	+	47058213-47059582	2	Yes	No
BIG-lncRNA-1079	BIG-lncRNA-1079.1	chr10	-	47275390-47276755	2	No	No
BIG-lncRNA-1080	BIG-lncRNA-1080.1	chr10	+	48879635-48885020	2	No	No
BIG-lncRNA-1081	BIG-lncRNA-1081.1	chr10	-	52158591-52176596	3	Yes	No
BIG-lncRNA-1081	BIG-lncRNA-1081.2	chr10	-	52163110-52176596	4	Yes	No
BIG-lncRNA-1081	BIG-lncRNA-1081.3	chr10	-	52163110-52176596	2	Yes	No
BIG-lncRNA-1081	BIG-lncRNA-1081.4	chr10	-	52164010-52176596	4	Yes	No
BIG-lncRNA-1081	BIG-lncRNA-1081.5	chr10	-	52165097-52176596	5	Yes	No
BIG-lncRNA-1081	BIG-lncRNA-1081.6	chr10	-	52165568-52176596	3	Yes	No
BIG-lncRNA-1081	BIG-lncRNA-1081.7	chr10	-	52166560-52176596	4	Yes	No
BIG-lncRNA-1081	BIG-lncRNA-1081.8	chr10	-	52170006-52176596	3	Yes	No
BIG-lncRNA-1081	BIG-lncRNA-1081.9	chr10	-	52170006-52176596	2	Yes	No
BIG-lncRNA-1082	BIG-lncRNA-1082.1	chr10	-	52749640-52751565	2	Yes	Yes
BIG-lncRNA-1083	BIG-lncRNA-1083.1	chr10	+	60281567-60304189	2	Yes	Yes
BIG-lncRNA-1083	BIG-lncRNA-1083.2	chr10	+	60281567-60304189	5	Yes	Yes
BIG-lncRNA-1083	BIG-lncRNA-1083.3	chr10	+	60281567-60304189	4	Yes	Yes
BIG-lncRNA-1083	BIG-lncRNA-1083.4	chr10	+	60281567-60304189	2	Yes	Yes
BIG-lncRNA-1083	BIG-lncRNA-1083.5	chr10	+	60281567-60304189	4	Yes	Yes
BIG-lncRNA-1084	BIG-lncRNA-1084.1	chr10	+	62172168-62213331	4	No	No
BIG-lncRNA-1085	BIG-lncRNA-1085.1	chr10	-	62437379-62487996	11	Yes	No
BIG-lncRNA-1086	BIG-lncRNA-1086.1	chr10	+	63702896-63724512	6	Yes	No
BIG-lncRNA-1086	BIG-lncRNA-1086.2	chr10	+	63702896-63721412	3	Yes	No
BIG-lncRNA-1086	BIG-lncRNA-1086.3	chr10	+	63702935-63721412	3	Yes	No
BIG-lncRNA-1086	BIG-lncRNA-1086.4	chr10	+	63702935-63724512	6	Yes	No
BIG-lncRNA-1087	BIG-lncRNA-1087.1	chr10	+	63778629-63784431	4	Yes	No
BIG-lncRNA-1087	BIG-lncRNA-1087.2	chr10	+	63778629-63787833	8	Yes	No
BIG-lncRNA-1088	BIG-lncRNA-1088.1	chr10	+	63829812-63834718	3	Yes	Yes
BIG-lncRNA-1088	BIG-lncRNA-1088.2	chr10	+	63829812-63834702	3	Yes	Yes
BIG-lncRNA-1088	BIG-lncRNA-1088.3	chr10	+	63829812-63834702	4	Yes	Yes
BIG-lncRNA-1088	BIG-lncRNA-1088.4	chr10	+	63829812-63834718	4	Yes	Yes
BIG-lncRNA-1089	BIG-lncRNA-1089.1	chr10	-	70818939-70821168	1	Yes	Yes
BIG-lncRNA-1089	BIG-lncRNA-1089.2	chr10	-	70818939-70821168	2	Yes	Yes
BIG-lncRNA-1090	BIG-lncRNA-1090.1	chr10	+	77231075-77453548	2	Yes	No
BIG-lncRNA-1091	BIG-lncRNA-1091.1	chr10	-	81101630-81107150	3	No	No
BIG-lncRNA-1092	BIG-lncRNA-1092.1	chr10	+	82416284-82418353	2	No	No
BIG-lncRNA-1093	BIG-lncRNA-1093.1	chr10	+	90342680-90344287	1	Yes	Yes
BIG-lncRNA-1093	BIG-lncRNA-1093.2	chr10	+	90342681-90344287	2	Yes	Yes
BIG-lncRNA-1093	BIG-lncRNA-1093.3	chr10	+	90342733-90344287	2	Yes	Yes
BIG-lncRNA-1094	BIG-lncRNA-1094.1	chr10	-	97626927-97630855	3	No	Yes
BIG-lncRNA-1095	BIG-lncRNA-1095.1	chr10	-	97888812-97889705	1	Yes	Yes
BIG-lncRNA-1096	BIG-lncRNA-1096.1	chr10	-	98461559-98468330	1	Yes	Yes
BIG-lncRNA-1097	BIG-lncRNA-1097.1	chr10	-	98561259-98561593	2	No	No
BIG-lncRNA-1098	BIG-lncRNA-1098.1	chr10	-	99172234-99175196	2	No	No
BIG-lncRNA-1099	BIG-lncRNA-1099.1	chr10	+	99771072-99804433	2	No	No
BIG-lncRNA-1100	BIG-lncRNA-1100.1	chr10	-	101615680-101634390	2	No	No
BIG-lncRNA-1101	BIG-lncRNA-1101.1	chr10	+	102434918-102569206	2	No	No
BIG-lncRNA-1102	BIG-lncRNA-1102.1	chr10	-	102943696-102948823	2	No	No
BIG-lncRNA-1103	BIG-lncRNA-1103.1	chr10	+	103080568-103107896	2	No	No
BIG-lncRNA-1104	BIG-lncRNA-1104.1	chr10	-	104611974-104614270	1	Yes	Yes
BIG-lncRNA-1105	BIG-lncRNA-1105.1	chr10	-	105342796-105353069	3	No	Yes
BIG-lncRNA-1106	BIG-lncRNA-1106.1	chr10	+	106225360-106406807	2	No	No
BIG-lncRNA-1107	BIG-lncRNA-1107.1	chr10	-	107252080-107255031	2	No	No
BIG-lncRNA-1108	BIG-lncRNA-1108.1	chr10	-	107561714-107562760	2	No	No
BIG-lncRNA-1109	BIG-lncRNA-1109.1	chr10	-	109300798-109303549	2	No	No
BIG-lncRNA-1110	BIG-lncRNA-1110.1	chr10	-	109399228-109415277	2	No	No
BIG-lncRNA-1111	BIG-lncRNA-1111.1	chr10	-	109409622-109413801	2	Yes	No
BIG-lncRNA-1112	BIG-lncRNA-1112.1	chr10	-	112324191-112325731	2	No	No
BIG-lncRNA-1113	BIG-lncRNA-1113.1	chr10	+	115993229-115996144	2	No	No
BIG-lncRNA-1114	BIG-lncRNA-1114.1	chr10	-	119632710-119673105	2	No	No
BIG-lncRNA-1115	BIG-lncRNA-1115.1	chr10	+	122073636-122079124	3	No	No
BIG-lncRNA-1116	BIG-lncRNA-1116.1	chr10	+	124403522-124404629	2	No	No
BIG-lncRNA-1117	BIG-lncRNA-1117.1	chr10	-	126604017-126605273	1	Yes	Yes
BIG-lncRNA-1117	BIG-lncRNA-1117.2	chr10	-	126604994-126605273	1	Yes	Yes
BIG-lncRNA-1118	BIG-lncRNA-1118.1	chr10	+	134133859-134135552	3	No	No
BIG-lncRNA-1119	BIG-lncRNA-1119.1	chr10	-	135499452-135501118	2	No	No
BIG-lncRNA-1120	BIG-lncRNA-1120.1	chr11	-	88928-92177	2	No	No
BIG-lncRNA-1121	BIG-lncRNA-1121.1	chr11	-	2205746-2251056	2	No	No
BIG-lncRNA-1122	BIG-lncRNA-1122.1	chr11	+	3195162-3195960	3	No	No
BIG-lncRNA-1123	BIG-lncRNA-1123.1	chr11	+	3862862-3863166	1	Yes	Yes
BIG-lncRNA-1124	BIG-lncRNA-1124.1	chr11	+	6742566-6744472	2	No	No
BIG-lncRNA-1125	BIG-lncRNA-1125.1	chr11	-	7914869-7915539	2	No	No
BIG-lncRNA-1126	BIG-lncRNA-1126.1	chr11	-	9300095-9300965	2	No	No
BIG-lncRNA-1127	BIG-lncRNA-1127.1	chr11	-	9593242-9594917	1	Yes	Yes
BIG-lncRNA-1128	BIG-lncRNA-1128.1	chr11	-	14111755-14276455	2	No	No
BIG-lncRNA-1129	BIG-lncRNA-1129.1	chr11	+	14671617-14673588	1	Yes	Yes
BIG-lncRNA-1130	BIG-lncRNA-1130.1	chr11	-	16061400-16117459	18	Yes	No
BIG-lncRNA-1131	BIG-lncRNA-1131.1	chr11	-	16619509-16625834	3	Yes	No
BIG-lncRNA-1132	BIG-lncRNA-1132.1	chr11	+	19636771-19637594	2	No	No
BIG-lncRNA-1133	BIG-lncRNA-1133.1	chr11	-	23205735-23211231	2	No	No
BIG-lncRNA-1134	BIG-lncRNA-1134.1	chr11	-	25349746-25509287	2	No	No
BIG-lncRNA-1135	BIG-lncRNA-1135.1	chr11	-	28797895-29021199	2	No	No
BIG-lncRNA-1136	BIG-lncRNA-1136.1	chr11	-	29620918-29621287	1	Yes	Yes
BIG-lncRNA-1137	BIG-lncRNA-1137.1	chr11	-	30740043-30745966	2	No	No
BIG-lncRNA-1138	BIG-lncRNA-1138.1	chr11	-	41209755-41221948	2	No	No
BIG-lncRNA-1139	BIG-lncRNA-1139.1	chr11	-	41430225-41431369	2	No	No
BIG-lncRNA-1140	BIG-lncRNA-1140.1	chr11	+	44275557-44297242	2	No	No
BIG-lncRNA-1141	BIG-lncRNA-1141.1	chr11	+	48056949-48060045	2	Yes	No
BIG-lncRNA-1141	BIG-lncRNA-1141.2	chr11	+	48057118-48060045	2	Yes	No
BIG-lncRNA-1142	BIG-lncRNA-1142.1	chr11	+	48080689-48091428	4	Yes	Yes
BIG-lncRNA-1142	BIG-lncRNA-1142.2	chr11	+	48080689-48091428	2	Yes	Yes
BIG-lncRNA-1142	BIG-lncRNA-1142.3	chr11	+	48080689-48091428	4	Yes	Yes
BIG-lncRNA-1143	BIG-lncRNA-1143.1	chr11	+	51569922-51579688	2	No	No
BIG-lncRNA-1144	BIG-lncRNA-1144.1	chr11	+	56290187-56459221	2	No	No
BIG-lncRNA-1145	BIG-lncRNA-1145.1	chr11	-	56641338-56854968	2	No	No
BIG-lncRNA-1146	BIG-lncRNA-1146.1	chr11	-	56853647-56965469	2	No	No
BIG-lncRNA-1147	BIG-lncRNA-1147.1	chr11	-	59911586-59915789	2	No	No
BIG-lncRNA-1148	BIG-lncRNA-1148.1	chr11	+	61740429-61745259	2	Yes	No
BIG-lncRNA-1148	BIG-lncRNA-1148.2	chr11	+	61740478-61745259	2	Yes	No
BIG-lncRNA-1148	BIG-lncRNA-1148.3	chr11	+	61740547-61745259	2	Yes	No
BIG-lncRNA-1149	BIG-lncRNA-1149.1	chr11	-	63551705-63557678	2	No	No
BIG-lncRNA-1150	BIG-lncRNA-1150.1	chr11	-	67349519-67350675	2	No	No
BIG-lncRNA-1151	BIG-lncRNA-1151.1	chr11	+	68878309-69030907	2	No	No
BIG-lncRNA-1152	BIG-lncRNA-1152.1	chr11	+	69512208-69514140	2	No	No
BIG-lncRNA-1153	BIG-lncRNA-1153.1	chr11	+	71354369-71355434	2	No	No
BIG-lncRNA-1154	BIG-lncRNA-1154.1	chr11	-	79049756-79081822	6	Yes	No
BIG-lncRNA-1154	BIG-lncRNA-1154.2	chr11	-	79057463-79081822	2	Yes	No
BIG-lncRNA-1154	BIG-lncRNA-1154.3	chr11	-	79065248-79081822	5	Yes	No
BIG-lncRNA-1154	BIG-lncRNA-1154.4	chr11	-	79067202-79081822	2	Yes	No
BIG-lncRNA-1154	BIG-lncRNA-1154.5	chr11	-	79070440-79081822	2	Yes	No
BIG-lncRNA-1154	BIG-lncRNA-1154.6	chr11	-	79075507-79081822	2	Yes	No
BIG-lncRNA-1154	BIG-lncRNA-1154.7	chr11	-	79075507-79081822	2	Yes	No
BIG-lncRNA-1155	BIG-lncRNA-1155.1	chr11	-	79086829-79109780	6	Yes	No
BIG-lncRNA-1155	BIG-lncRNA-1155.2	chr11	-	79088279-79109780	7	Yes	No
BIG-lncRNA-1155	BIG-lncRNA-1155.3	chr11	-	79092316-79109780	6	Yes	No
BIG-lncRNA-1156	BIG-lncRNA-1156.1	chr11	+	79712246-79747559	2	No	No
BIG-lncRNA-1157	BIG-lncRNA-1157.1	chr11	+	80445502-80446861	2	No	No
BIG-lncRNA-1158	BIG-lncRNA-1158.1	chr11	-	82292870-82391028	2	No	No
BIG-lncRNA-1159	BIG-lncRNA-1159.1	chr11	+	85195031-85195232	1	Yes	Yes
BIG-lncRNA-1160	BIG-lncRNA-1160.1	chr11	-	85606209-85610015	2	No	No
BIG-lncRNA-1161	BIG-lncRNA-1161.1	chr11	-	85818014-85819116	2	No	No
BIG-lncRNA-1162	BIG-lncRNA-1162.1	chr11	+	90348804-90351475	2	No	No
BIG-lncRNA-1163	BIG-lncRNA-1163.1	chr11	+	92438382-92439440	2	No	No
BIG-lncRNA-1164	BIG-lncRNA-1164.1	chr11	-	92697903-92851401	3	No	No
BIG-lncRNA-1165	BIG-lncRNA-1165.1	chr11	+	94082941-94087330	2	No	No
BIG-lncRNA-1166	BIG-lncRNA-1166.1	chr11	-	95884116-95890258	4	Yes	No
BIG-lncRNA-1166	BIG-lncRNA-1166.2	chr11	-	95884116-95890321	4	Yes	No
BIG-lncRNA-1166	BIG-lncRNA-1166.3	chr11	-	95884116-95890173	4	Yes	No
BIG-lncRNA-1166	BIG-lncRNA-1166.4	chr11	-	95886750-95890173	2	Yes	No
BIG-lncRNA-1166	BIG-lncRNA-1166.5	chr11	-	95886750-95890258	2	Yes	No
BIG-lncRNA-1166	BIG-lncRNA-1166.6	chr11	-	95886750-95890321	2	Yes	No
BIG-lncRNA-1166	BIG-lncRNA-1166.7	chr11	-	95889040-95901947	3	Yes	No
BIG-lncRNA-1166	BIG-lncRNA-1166.8	chr11	-	95892913-95901947	6	Yes	No
BIG-lncRNA-1167	BIG-lncRNA-1167.1	chr11	+	103641845-103644183	2	No	No
BIG-lncRNA-1168	BIG-lncRNA-1168.1	chr11	-	105189117-105193468	2	No	No
BIG-lncRNA-1169	BIG-lncRNA-1169.1	chr11	+	109811712-109813966	2	Yes	No
BIG-lncRNA-1170	BIG-lncRNA-1170.1	chr11	+	112124746-112125895	2	No	No
BIG-lncRNA-1171	BIG-lncRNA-1171.1	chr11	-	112668086-112683354	2	No	No
BIG-lncRNA-1172	BIG-lncRNA-1172.1	chr11	-	115257194-115261387	3	Yes	No
BIG-lncRNA-1172	BIG-lncRNA-1172.2	chr11	-	115257194-115262501	3	Yes	No
BIG-lncRNA-1172	BIG-lncRNA-1172.3	chr11	-	115257194-115262480	3	Yes	No
BIG-lncRNA-1173	BIG-lncRNA-1173.1	chr11	+	119665197-119672675	2	No	No
BIG-lncRNA-1174	BIG-lncRNA-1174.1	chr11	+	119698434-119701531	2	No	No
BIG-lncRNA-1175	BIG-lncRNA-1175.1	chr11	-	122212131-122213840	2	No	No
BIG-lncRNA-1176	BIG-lncRNA-1176.1	chr11	+	123246226-123248199	2	No	No
BIG-lncRNA-1177	BIG-lncRNA-1177.1	chr11	+	124159467-124168240	3	No	Yes
BIG-lncRNA-1178	BIG-lncRNA-1178.1	chr11	-	125654133-125736090	2	No	No
BIG-lncRNA-1179	BIG-lncRNA-1179.1	chr11	-	129063917-129094662	15	Yes	No
BIG-lncRNA-1179	BIG-lncRNA-1179.2	chr11	-	129068246-129094662	15	Yes	No
BIG-lncRNA-1180	BIG-lncRNA-1180.1	chr11	-	129103201-129138558	5	Yes	Yes
BIG-lncRNA-1180	BIG-lncRNA-1180.2	chr11	-	129103671-129138558	5	Yes	Yes
BIG-lncRNA-1181	BIG-lncRNA-1181.1	chr11	-	130240568-130253344	3	No	No
BIG-lncRNA-1182	BIG-lncRNA-1182.1	chr11	-	131290802-131292527	2	No	No
BIG-lncRNA-1183	BIG-lncRNA-1183.1	chr11	+	131735307-131736137	2	No	No
BIG-lncRNA-1184	BIG-lncRNA-1184.1	chr11	-	134144743-134146095	1	Yes	Yes
BIG-lncRNA-1185	BIG-lncRNA-1185.1	chr11	+	134309921-134310787	2	No	No
BIG-lncRNA-1186	BIG-lncRNA-1186.1	chr11	+	134321351-134322010	3	No	No
BIG-lncRNA-1187	BIG-lncRNA-1187.1	chr12	-	1799666-1800039	1	Yes	Yes
BIG-lncRNA-1188	BIG-lncRNA-1188.1	chr12	-	2041727-2042557	2	No	No
BIG-lncRNA-1189	BIG-lncRNA-1189.1	chr12	+	2445810-2449251	3	Yes	No
BIG-lncRNA-1189	BIG-lncRNA-1189.2	chr12	+	2445842-2449251	3	Yes	No
BIG-lncRNA-1190	BIG-lncRNA-1190.1	chr12	+	2451312-2453654	2	Yes	No
BIG-lncRNA-1191	BIG-lncRNA-1191.1	chr12	+	2468722-2485581	6	Yes	No
BIG-lncRNA-1191	BIG-lncRNA-1191.2	chr12	+	2468722-2500604	7	Yes	No
BIG-lncRNA-1192	BIG-lncRNA-1192.1	chr12	-	2593589-2830329	2	No	No
BIG-lncRNA-1193	BIG-lncRNA-1193.1	chr12	+	2829228-2830039	2	No	No
BIG-lncRNA-1194	BIG-lncRNA-1194.1	chr12	+	3664786-3665721	2	No	No
BIG-lncRNA-1195	BIG-lncRNA-1195.1	chr12	-	5921217-5923337	2	No	No
BIG-lncRNA-1196	BIG-lncRNA-1196.1	chr12	-	6031980-6032491	2	Yes	No
BIG-lncRNA-1196	BIG-lncRNA-1196.2	chr12	-	6031980-6032472	2	Yes	No
BIG-lncRNA-1197	BIG-lncRNA-1197.1	chr12	+	6037635-6039574	2	No	No
BIG-lncRNA-1198	BIG-lncRNA-1198.1	chr12	-	6040456-6041998	2	Yes	No
BIG-lncRNA-1199	BIG-lncRNA-1199.1	chr12	+	7312217-7313158	2	No	No
BIG-lncRNA-1200	BIG-lncRNA-1200.1	chr12	-	8178927-8179202	1	Yes	Yes
BIG-lncRNA-1201	BIG-lncRNA-1201.1	chr12	-	8182384-8186071	1	Yes	Yes
BIG-lncRNA-1202	BIG-lncRNA-1202.1	chr12	+	8757081-8779524	2	No	No
BIG-lncRNA-1203	BIG-lncRNA-1203.1	chr12	+	8955412-8956136	2	No	No
BIG-lncRNA-1204	BIG-lncRNA-1204.1	chr12	+	9756522-9758364	2	No	No
BIG-lncRNA-1205	BIG-lncRNA-1205.1	chr12	-	11133329-11222332	2	No	No
BIG-lncRNA-1206	BIG-lncRNA-1206.1	chr12	-	11203660-11275306	2	No	No
BIG-lncRNA-1207	BIG-lncRNA-1207.1	chr12	-	11218444-11277036	2	No	No
BIG-lncRNA-1208	BIG-lncRNA-1208.1	chr12	-	11254438-11292523	2	No	No
BIG-lncRNA-1209	BIG-lncRNA-1209.1	chr12	-	11661943-11669447	2	No	No
BIG-lncRNA-1210	BIG-lncRNA-1210.1	chr12	+	11931461-11941416	8	Yes	No
BIG-lncRNA-1210	BIG-lncRNA-1210.2	chr12	+	11931461-11938344	4	Yes	No
BIG-lncRNA-1211	BIG-lncRNA-1211.1	chr12	+	12213792-12217124	2	No	No
BIG-lncRNA-1212	BIG-lncRNA-1212.1	chr12	+	12894214-12905039	6	No	Yes
BIG-lncRNA-1213	BIG-lncRNA-1213.1	chr12	-	14888051-14898278	4	Yes	No
BIG-lncRNA-1213	BIG-lncRNA-1213.2	chr12	-	14888051-14898278	3	Yes	No
BIG-lncRNA-1213	BIG-lncRNA-1213.3	chr12	-	14888051-14898278	4	Yes	No
BIG-lncRNA-1214	BIG-lncRNA-1214.1	chr12	+	16536886-16540057	2	No	Yes
BIG-lncRNA-1215	BIG-lncRNA-1215.1	chr12	+	16576313-16576994	2	No	No
BIG-lncRNA-1216	BIG-lncRNA-1216.1	chr12	+	16827931-16852111	4	Yes	No
BIG-lncRNA-1217	BIG-lncRNA-1217.1	chr12	+	19285727-19313718	3	Yes	Yes
BIG-lncRNA-1217	BIG-lncRNA-1217.2	chr12	+	19285878-19313718	3	Yes	Yes
BIG-lncRNA-1217	BIG-lncRNA-1217.3	chr12	+	19307717-19313718	5	No	Yes
BIG-lncRNA-1218	BIG-lncRNA-1218.1	chr12	+	19320369-19321945	2	Yes	No
BIG-lncRNA-1218	BIG-lncRNA-1218.2	chr12	+	19320369-19335011	5	Yes	No
BIG-lncRNA-1218	BIG-lncRNA-1218.3	chr12	+	19320369-19346641	17	Yes	No
BIG-lncRNA-1219	BIG-lncRNA-1219.1	chr12	-	23517927-23521686	2	No	No
BIG-lncRNA-1220	BIG-lncRNA-1220.1	chr12	-	23658881-23663960	2	No	No
BIG-lncRNA-1221	BIG-lncRNA-1221.1	chr12	+	28705884-28708620	2	No	No
BIG-lncRNA-1222	BIG-lncRNA-1222.1	chr12	+	29089906-29091714	2	No	No
BIG-lncRNA-1223	BIG-lncRNA-1223.1	chr12	-	31750804-31752765	2	No	No
BIG-lncRNA-1224	BIG-lncRNA-1224.1	chr12	-	33855045-33857180	2	No	No
BIG-lncRNA-1225	BIG-lncRNA-1225.1	chr12	-	38019957-38145757	2	No	No
BIG-lncRNA-1226	BIG-lncRNA-1226.1	chr12	-	38042924-38050802	2	No	No
BIG-lncRNA-1227	BIG-lncRNA-1227.1	chr12	-	38108619-38112304	2	No	No
BIG-lncRNA-1228	BIG-lncRNA-1228.1	chr12	-	38444775-38445116	2	No	No
BIG-lncRNA-1229	BIG-lncRNA-1229.1	chr12	+	46384742-46387739	1	Yes	Yes
BIG-lncRNA-1230	BIG-lncRNA-1230.1	chr12	+	46997096-46999695	2	No	No
BIG-lncRNA-1231	BIG-lncRNA-1231.1	chr12	+	47053882-47057361	2	Yes	No
BIG-lncRNA-1232	BIG-lncRNA-1232.1	chr12	+	49583064-49583942	1	Yes	Yes
BIG-lncRNA-1233	BIG-lncRNA-1233.1	chr12	-	50093389-50099801	1	Yes	Yes
BIG-lncRNA-1234	BIG-lncRNA-1234.1	chr12	+	52609423-52611115	2	No	No
BIG-lncRNA-1235	BIG-lncRNA-1235.1	chr12	-	53645305-53645834	2	No	Yes
BIG-lncRNA-1236	BIG-lncRNA-1236.1	chr12	+	55581614-55805308	2	No	No
BIG-lncRNA-1237	BIG-lncRNA-1237.1	chr12	+	66023110-66024902	2	No	No
BIG-lncRNA-1238	BIG-lncRNA-1238.1	chr12	+	66067274-66070294	2	No	No
BIG-lncRNA-1239	BIG-lncRNA-1239.1	chr12	-	66397135-66397614	2	No	No
BIG-lncRNA-1240	BIG-lncRNA-1240.1	chr12	-	67363103-67443581	2	No	No
BIG-lncRNA-1241	BIG-lncRNA-1241.1	chr12	-	67410190-67413677	2	No	No
BIG-lncRNA-1242	BIG-lncRNA-1242.1	chr12	-	67424120-67426301	2	No	No
BIG-lncRNA-1243	BIG-lncRNA-1243.1	chr12	-	73592556-73682880	2	No	No
BIG-lncRNA-1244	BIG-lncRNA-1244.1	chr12	-	74134953-74204677	2	No	No
BIG-lncRNA-1245	BIG-lncRNA-1245.1	chr12	-	76067868-76069308	2	No	No
BIG-lncRNA-1246	BIG-lncRNA-1246.1	chr12	-	80512439-80513682	2	No	No
BIG-lncRNA-1247	BIG-lncRNA-1247.1	chr12	-	85422383-85423312	2	No	No
BIG-lncRNA-1248	BIG-lncRNA-1248.1	chr12	-	85668509-85671251	2	No	No
BIG-lncRNA-1249	BIG-lncRNA-1249.1	chr12	-	91726272-91728919	2	No	No
BIG-lncRNA-1250	BIG-lncRNA-1250.1	chr12	-	91811914-91813388	2	No	No
BIG-lncRNA-1251	BIG-lncRNA-1251.1	chr12	+	92216554-92217929	2	No	No
BIG-lncRNA-1252	BIG-lncRNA-1252.1	chr12	-	92357568-92360359	2	No	No
BIG-lncRNA-1253	BIG-lncRNA-1253.1	chr12	-	92367719-92368168	2	No	No
BIG-lncRNA-1254	BIG-lncRNA-1254.1	chr12	-	92701928-92725460	2	No	No
BIG-lncRNA-1255	BIG-lncRNA-1255.1	chr12	-	92939971-92954811	2	No	No
BIG-lncRNA-1256	BIG-lncRNA-1256.1	chr12	-	93527031-93529436	2	No	No
BIG-lncRNA-1257	BIG-lncRNA-1257.1	chr12	+	96429554-96478244	2	No	No
BIG-lncRNA-1258	BIG-lncRNA-1258.1	chr12	+	98048319-98102357	2	No	No
BIG-lncRNA-1259	BIG-lncRNA-1259.1	chr12	-	100190463-100199040	1	Yes	Yes
BIG-lncRNA-1260	BIG-lncRNA-1260.1	chr12	+	104827185-104829479	2	No	No
BIG-lncRNA-1261	BIG-lncRNA-1261.1	chr12	-	108963900-108966256	2	No	No
BIG-lncRNA-1262	BIG-lncRNA-1262.1	chr12	+	110486516-110488071	2	Yes	No
BIG-lncRNA-1263	BIG-lncRNA-1263.1	chr12	-	116149138-116149487	2	No	No
BIG-lncRNA-1264	BIG-lncRNA-1264.1	chr12	+	124512132-124603733	2	No	No
BIG-lncRNA-1265	BIG-lncRNA-1265.1	chr12	-	124669289-124673049	2	No	No
BIG-lncRNA-1266	BIG-lncRNA-1266.1	chr12	-	125196717-125198310	2	Yes	No
BIG-lncRNA-1266	BIG-lncRNA-1266.2	chr12	-	125196717-125198334	2	Yes	No
BIG-lncRNA-1266	BIG-lncRNA-1266.3	chr12	-	125196717-125197643	2	Yes	No
BIG-lncRNA-1267	BIG-lncRNA-1267.1	chr12	-	127502310-127503455	2	No	No
BIG-lncRNA-1268	BIG-lncRNA-1268.1	chr12	-	127516612-127522756	2	No	No
BIG-lncRNA-1269	BIG-lncRNA-1269.1	chr12	-	130732230-130732594	2	No	No
BIG-lncRNA-1270	BIG-lncRNA-1270.1	chr12	-	130876169-130878240	3	No	No
BIG-lncRNA-1271	BIG-lncRNA-1271.1	chr12	-	131248757-131250162	2	No	No
BIG-lncRNA-1272	BIG-lncRNA-1272.1	chr12	+	131639324-131641589	2	No	No
BIG-lncRNA-1273	BIG-lncRNA-1273.1	chr12	-	131726782-131729592	2	No	No
BIG-lncRNA-1274	BIG-lncRNA-1274.1	chr12	+	131817305-131830191	2	No	No
BIG-lncRNA-1275	BIG-lncRNA-1275.1	chr13	-	19336983-19359796	2	No	No
BIG-lncRNA-1276	BIG-lncRNA-1276.1	chr13	-	19359058-19610183	2	No	No
BIG-lncRNA-1277	BIG-lncRNA-1277.1	chr13	-	19641877-19698431	2	No	No
BIG-lncRNA-1278	BIG-lncRNA-1278.1	chr13	+	22658298-22659421	2	No	No
BIG-lncRNA-1279	BIG-lncRNA-1279.1	chr13	+	22683111-22684215	2	No	No
BIG-lncRNA-1280	BIG-lncRNA-1280.1	chr13	-	23275545-23325372	2	No	No
BIG-lncRNA-1281	BIG-lncRNA-1281.1	chr13	-	32328108-32329336	2	Yes	No
BIG-lncRNA-1282	BIG-lncRNA-1282.1	chr13	+	33924325-33932084	2	Yes	No
BIG-lncRNA-1282	BIG-lncRNA-1282.2	chr13	+	33924339-33932084	2	Yes	No
BIG-lncRNA-1283	BIG-lncRNA-1283.1	chr13	-	34218222-34220937	2	No	No
BIG-lncRNA-1284	BIG-lncRNA-1284.1	chr13	-	43341516-43342830	2	No	No
BIG-lncRNA-1285	BIG-lncRNA-1285.1	chr13	+	49356863-49391351	4	No	No
BIG-lncRNA-1286	BIG-lncRNA-1286.1	chr13	+	51279935-51352864	2	No	No
BIG-lncRNA-1287	BIG-lncRNA-1287.1	chr13	-	52473976-52475544	2	No	No
BIG-lncRNA-1288	BIG-lncRNA-1288.1	chr13	+	55194353-55196091	2	No	No
BIG-lncRNA-1289	BIG-lncRNA-1289.1	chr13	+	55863394-55866268	3	No	No
BIG-lncRNA-1290	BIG-lncRNA-1290.1	chr13	+	55913135-55915761	2	No	No
BIG-lncRNA-1291	BIG-lncRNA-1291.1	chr13	-	56545767-56756655	2	No	No
BIG-lncRNA-1292	BIG-lncRNA-1292.1	chr13	+	56614385-56620301	2	No	No
BIG-lncRNA-1293	BIG-lncRNA-1293.1	chr13	+	61664907-61785403	2	No	No
BIG-lncRNA-1294	BIG-lncRNA-1294.1	chr13	-	63624476-63626434	2	No	No
BIG-lncRNA-1295	BIG-lncRNA-1295.1	chr13	-	66783310-66784908	2	No	No
BIG-lncRNA-1296	BIG-lncRNA-1296.1	chr13	-	67096268-67097054	2	No	No
BIG-lncRNA-1297	BIG-lncRNA-1297.1	chr13	-	67685810-67686909	2	No	No
BIG-lncRNA-1298	BIG-lncRNA-1298.1	chr13	+	69833452-70049725	2	No	No
BIG-lncRNA-1299	BIG-lncRNA-1299.1	chr13	-	74855737-74857899	2	No	No
BIG-lncRNA-1300	BIG-lncRNA-1300.1	chr13	+	81645266-81682733	2	No	No
BIG-lncRNA-1301	BIG-lncRNA-1301.1	chr13	+	88955640-88960415	2	No	No
BIG-lncRNA-1302	BIG-lncRNA-1302.1	chr13	-	91500838-91506510	2	No	No
BIG-lncRNA-1303	BIG-lncRNA-1303.1	chr13	+	92858388-93110531	2	No	No
BIG-lncRNA-1304	BIG-lncRNA-1304.1	chr13	+	93008156-93019803	2	Yes	No
BIG-lncRNA-1305	BIG-lncRNA-1305.1	chr13	+	93050696-93061330	2	No	No
BIG-lncRNA-1306	BIG-lncRNA-1306.1	chr13	+	93940381-93944131	2	No	No
BIG-lncRNA-1307	BIG-lncRNA-1307.1	chr13	+	94419031-94424022	2	No	No
BIG-lncRNA-1308	BIG-lncRNA-1308.1	chr13	+	96864682-96876864	2	No	No
BIG-lncRNA-1309	BIG-lncRNA-1309.1	chr13	+	97036239-97196212	2	No	No
BIG-lncRNA-1310	BIG-lncRNA-1310.1	chr13	-	100129033-100129772	2	No	No
BIG-lncRNA-1311	BIG-lncRNA-1311.1	chr13	+	100129117-100129407	2	No	No
BIG-lncRNA-1312	BIG-lncRNA-1312.1	chr13	-	102969992-102976578	2	Yes	No
BIG-lncRNA-1313	BIG-lncRNA-1313.1	chr13	+	104144118-104144869	2	No	No
BIG-lncRNA-1314	BIG-lncRNA-1314.1	chr13	-	107571303-107571976	2	No	No
BIG-lncRNA-1315	BIG-lncRNA-1315.1	chr13	-	108323541-108325323	2	No	No
BIG-lncRNA-1316	BIG-lncRNA-1316.1	chr13	+	109239699-109346548	2	No	No
BIG-lncRNA-1317	BIG-lncRNA-1317.1	chr13	-	109971491-110186143	3	No	No
BIG-lncRNA-1318	BIG-lncRNA-1318.1	chr13	+	110652778-110654283	2	Yes	No
BIG-lncRNA-1318	BIG-lncRNA-1318.2	chr13	+	110652815-110654283	2	Yes	No
BIG-lncRNA-1319	BIG-lncRNA-1319.1	chr13	-	110713985-110790293	2	Yes	No
BIG-lncRNA-1320	BIG-lncRNA-1320.1	chr13	+	113765403-113767667	3	No	No
BIG-lncRNA-1321	BIG-lncRNA-1321.1	chr13	-	113949698-113951225	1	Yes	Yes
BIG-lncRNA-1322	BIG-lncRNA-1322.1	chr14	+	19000377-19040970	4	No	No
BIG-lncRNA-1323	BIG-lncRNA-1323.1	chr14	+	19000848-19035654	3	No	No
BIG-lncRNA-1324	BIG-lncRNA-1324.1	chr14	+	19001117-19049021	2	No	No
BIG-lncRNA-1325	BIG-lncRNA-1325.1	chr14	+	19004470-19249871	4	No	No
BIG-lncRNA-1326	BIG-lncRNA-1326.1	chr14	+	19597452-19599823	2	No	No
BIG-lncRNA-1327	BIG-lncRNA-1327.1	chr14	+	19625812-19629704	2	No	No
BIG-lncRNA-1328	BIG-lncRNA-1328.1	chr14	+	21093523-21093741	1	Yes	Yes
BIG-lncRNA-1329	BIG-lncRNA-1329.1	chr14	-	22959121-22961133	2	Yes	No
BIG-lncRNA-1330	BIG-lncRNA-1330.1	chr14	+	24667539-24668280	1	Yes	Yes
BIG-lncRNA-1331	BIG-lncRNA-1331.1	chr14	-	28027325-28028439	2	No	No
BIG-lncRNA-1332	BIG-lncRNA-1332.1	chr14	+	28317818-28371584	4	No	No
BIG-lncRNA-1333	BIG-lncRNA-1333.1	chr14	-	29532049-29593765	2	Yes	No
BIG-lncRNA-1334	BIG-lncRNA-1334.1	chr14	+	35944229-35952072	2	No	No
BIG-lncRNA-1335	BIG-lncRNA-1335.1	chr14	+	40277186-40464140	2	No	No
BIG-lncRNA-1336	BIG-lncRNA-1336.1	chr14	+	41968639-41971288	2	No	No
BIG-lncRNA-1337	BIG-lncRNA-1337.1	chr14	+	51904875-51994457	2	No	No
BIG-lncRNA-1338	BIG-lncRNA-1338.1	chr14	+	53466059-53466558	2	No	No
BIG-lncRNA-1339	BIG-lncRNA-1339.1	chr14	+	61155448-61175449	2	No	No
BIG-lncRNA-1340	BIG-lncRNA-1340.1	chr14	-	65691320-65693658	2	No	No
BIG-lncRNA-1341	BIG-lncRNA-1341.1	chr14	+	72454448-72459376	2	No	No
BIG-lncRNA-1342	BIG-lncRNA-1342.1	chr14	+	72459474-72675286	2	No	No
BIG-lncRNA-1343	BIG-lncRNA-1343.1	chr14	-	72611627-72631360	2	Yes	No
BIG-lncRNA-1343	BIG-lncRNA-1343.2	chr14	-	72611627-72631343	2	Yes	No
BIG-lncRNA-1344	BIG-lncRNA-1344.1	chr14	+	75642743-75644067	1	Yes	Yes
BIG-lncRNA-1344	BIG-lncRNA-1344.2	chr14	+	75642926-75644067	1	Yes	Yes
BIG-lncRNA-1344	BIG-lncRNA-1344.3	chr14	+	75642953-75644067	1	Yes	Yes
BIG-lncRNA-1344	BIG-lncRNA-1344.4	chr14	+	75643750-75644067	1	Yes	Yes
BIG-lncRNA-1345	BIG-lncRNA-1345.1	chr14	-	80889818-80892089	1	Yes	Yes
BIG-lncRNA-1346	BIG-lncRNA-1346.1	chr14	-	80928616-80931210	2	No	No
BIG-lncRNA-1347	BIG-lncRNA-1347.1	chr14	-	92854310-92859965	2	No	No
BIG-lncRNA-1348	BIG-lncRNA-1348.1	chr14	-	95116991-95117680	2	No	No
BIG-lncRNA-1349	BIG-lncRNA-1349.1	chr14	-	95792472-95794375	2	No	No
BIG-lncRNA-1350	BIG-lncRNA-1350.1	chr14	+	97047373-97049139	2	No	No
BIG-lncRNA-1351	BIG-lncRNA-1351.1	chr14	+	97444022-97445968	2	No	Yes
BIG-lncRNA-1352	BIG-lncRNA-1352.1	chr14	-	99164972-99165328	2	No	No
BIG-lncRNA-1353	BIG-lncRNA-1353.1	chr14	-	102600701-102601176	1	Yes	Yes
BIG-lncRNA-1354	BIG-lncRNA-1354.1	chr14	-	104352693-104353639	2	No	No
BIG-lncRNA-1355	BIG-lncRNA-1355.1	chr14	+	104362831-104363177	2	No	No
BIG-lncRNA-1356	BIG-lncRNA-1356.1	chr14	+	104698111-104858985	2	Yes	No
BIG-lncRNA-1357	BIG-lncRNA-1357.1	chr14	-	106029935-106150258	2	No	No
BIG-lncRNA-1358	BIG-lncRNA-1358.1	chr15	+	20007403-20024812	2	No	No
BIG-lncRNA-1359	BIG-lncRNA-1359.1	chr15	+	20007703-20028000	2	No	No
BIG-lncRNA-1360	BIG-lncRNA-1360.1	chr15	+	20010190-20041651	3	No	No
BIG-lncRNA-1361	BIG-lncRNA-1361.1	chr15	+	20011436-20042493	2	No	No
BIG-lncRNA-1362	BIG-lncRNA-1362.1	chr15	+	20025657-20036846	2	No	No
BIG-lncRNA-1363	BIG-lncRNA-1363.1	chr15	+	20100426-20145363	2	No	No
BIG-lncRNA-1364	BIG-lncRNA-1364.1	chr15	+	20133806-20134295	2	No	No
BIG-lncRNA-1365	BIG-lncRNA-1365.1	chr15	+	20792207-20966723	2	No	No
BIG-lncRNA-1366	BIG-lncRNA-1366.1	chr15	+	21039067-21039487	2	No	No
BIG-lncRNA-1367	BIG-lncRNA-1367.1	chr15	+	23247459-23247997	2	No	No
BIG-lncRNA-1368	BIG-lncRNA-1368.1	chr15	+	23627169-23632414	3	No	No
BIG-lncRNA-1369	BIG-lncRNA-1369.1	chr15	+	23689968-23693660	2	No	No
BIG-lncRNA-1370	BIG-lncRNA-1370.1	chr15	+	24587708-24802619	2	No	No
BIG-lncRNA-1371	BIG-lncRNA-1371.1	chr15	+	28654379-28657199	2	No	No
BIG-lncRNA-1372	BIG-lncRNA-1372.1	chr15	+	28659044-28665326	2	No	No
BIG-lncRNA-1373	BIG-lncRNA-1373.1	chr15	-	34128456-34130840	2	No	No
BIG-lncRNA-1374	BIG-lncRNA-1374.1	chr15	+	36480666-36692905	2	No	No
BIG-lncRNA-1375	BIG-lncRNA-1375.1	chr15	+	37423622-37425374	2	No	No
BIG-lncRNA-1376	BIG-lncRNA-1376.1	chr15	-	38911995-38916812	3	Yes	No
BIG-lncRNA-1377	BIG-lncRNA-1377.1	chr15	+	39655449-39657935	2	No	No
BIG-lncRNA-1378	BIG-lncRNA-1378.1	chr15	-	42324930-42327706	2	No	No
BIG-lncRNA-1379	BIG-lncRNA-1379.1	chr15	-	46842989-46843908	2	No	No
BIG-lncRNA-1380	BIG-lncRNA-1380.1	chr15	-	47103764-47106366	2	No	No
BIG-lncRNA-1381	BIG-lncRNA-1381.1	chr15	-	47139279-47146214	2	No	No
BIG-lncRNA-1382	BIG-lncRNA-1382.1	chr15	-	48967149-48968545	2	No	No
BIG-lncRNA-1383	BIG-lncRNA-1383.1	chr15	-	48982893-48985826	1	Yes	Yes
BIG-lncRNA-1384	BIG-lncRNA-1384.1	chr15	-	50433916-50436907	2	No	No
BIG-lncRNA-1385	BIG-lncRNA-1385.1	chr15	+	51342912-51345690	2	No	No
BIG-lncRNA-1386	BIG-lncRNA-1386.1	chr15	-	61077455-61338984	2	No	No
BIG-lncRNA-1387	BIG-lncRNA-1387.1	chr15	-	61204483-61207402	2	No	No
BIG-lncRNA-1388	BIG-lncRNA-1388.1	chr15	-	61438559-61441789	2	No	No
BIG-lncRNA-1389	BIG-lncRNA-1389.1	chr15	-	63795049-63796587	1	Yes	Yes
BIG-lncRNA-1389	BIG-lncRNA-1389.2	chr15	-	63795049-63796077	1	Yes	Yes
BIG-lncRNA-1389	BIG-lncRNA-1389.3	chr15	-	63795049-63796017	1	Yes	Yes
BIG-lncRNA-1390	BIG-lncRNA-1390.1	chr15	-	65086801-65098679	2	No	No
BIG-lncRNA-1391	BIG-lncRNA-1391.1	chr15	+	65186270-65191580	2	Yes	No
BIG-lncRNA-1391	BIG-lncRNA-1391.2	chr15	+	65186457-65191580	2	Yes	No
BIG-lncRNA-1392	BIG-lncRNA-1392.1	chr15	-	65481653-65519746	2	No	No
BIG-lncRNA-1393	BIG-lncRNA-1393.1	chr15	-	66129273-66130117	2	No	No
BIG-lncRNA-1394	BIG-lncRNA-1394.1	chr15	-	68157867-68162176	2	No	No
BIG-lncRNA-1395	BIG-lncRNA-1395.1	chr15	-	68733265-68851670	2	No	No
BIG-lncRNA-1396	BIG-lncRNA-1396.1	chr15	+	70558973-70560277	2	No	No
BIG-lncRNA-1397	BIG-lncRNA-1397.1	chr15	+	72523861-72524538	1	Yes	Yes
BIG-lncRNA-1398	BIG-lncRNA-1398.1	chr15	+	72548818-72557698	9	No	No
BIG-lncRNA-1399	BIG-lncRNA-1399.1	chr15	+	79047108-79049131	2	No	No
BIG-lncRNA-1400	BIG-lncRNA-1400.1	chr15	-	79317221-79384824	3	No	No
BIG-lncRNA-1401	BIG-lncRNA-1401.1	chr15	+	86439778-86440837	3	No	No
BIG-lncRNA-1402	BIG-lncRNA-1402.1	chr15	+	88349209-88387544	3	No	No
BIG-lncRNA-1403	BIG-lncRNA-1403.1	chr15	-	89090540-89105475	2	No	No
BIG-lncRNA-1404	BIG-lncRNA-1404.1	chr15	+	95365372-95418239	2	No	No
BIG-lncRNA-1405	BIG-lncRNA-1405.1	chr15	+	95451364-95454472	2	No	No
BIG-lncRNA-1406	BIG-lncRNA-1406.1	chr15	+	95497774-95498601	2	No	No
BIG-lncRNA-1407	BIG-lncRNA-1407.1	chr15	-	96452886-96453203	2	No	No
BIG-lncRNA-1408	BIG-lncRNA-1408.1	chr15	+	100891034-100892588	2	Yes	No
BIG-lncRNA-1408	BIG-lncRNA-1408.2	chr15	+	100891054-100892588	2	Yes	No
BIG-lncRNA-1409	BIG-lncRNA-1409.1	chr16	+	868408-869081	2	No	No
BIG-lncRNA-1410	BIG-lncRNA-1410.1	chr16	+	1756808-1757896	1	Yes	Yes
BIG-lncRNA-1411	BIG-lncRNA-1411.1	chr16	+	5707499-5707884	2	No	No
BIG-lncRNA-1412	BIG-lncRNA-1412.1	chr16	+	6094010-6298037	2	No	No
BIG-lncRNA-1413	BIG-lncRNA-1413.1	chr16	+	6256117-6420461	2	No	No
BIG-lncRNA-1414	BIG-lncRNA-1414.1	chr16	+	6742588-6743880	3	Yes	No
BIG-lncRNA-1414	BIG-lncRNA-1414.2	chr16	+	6742749-6743880	3	Yes	No
BIG-lncRNA-1414	BIG-lncRNA-1414.3	chr16	+	6742801-6743880	3	Yes	No
BIG-lncRNA-1414	BIG-lncRNA-1414.4	chr16	+	6742973-6743880	3	Yes	No
BIG-lncRNA-1414	BIG-lncRNA-1414.5	chr16	+	6743340-6743880	2	Yes	No
BIG-lncRNA-1415	BIG-lncRNA-1415.1	chr16	-	9140485-9142652	2	No	No
BIG-lncRNA-1416	BIG-lncRNA-1416.1	chr16	+	9773314-9774595	2	No	No
BIG-lncRNA-1417	BIG-lncRNA-1417.1	chr16	-	10133686-10134467	2	No	No
BIG-lncRNA-1418	BIG-lncRNA-1418.1	chr16	+	13099379-13102264	2	No	No
BIG-lncRNA-1419	BIG-lncRNA-1419.1	chr16	+	13128022-13159354	2	No	No
BIG-lncRNA-1420	BIG-lncRNA-1420.1	chr16	+	13133364-13207199	2	Yes	No
BIG-lncRNA-1421	BIG-lncRNA-1421.1	chr16	-	15195332-15195766	2	No	No
BIG-lncRNA-1422	BIG-lncRNA-1422.1	chr16	-	16526678-16527909	3	No	No
BIG-lncRNA-1423	BIG-lncRNA-1423.1	chr16	+	16956322-16957889	2	No	No
BIG-lncRNA-1424	BIG-lncRNA-1424.1	chr16	-	17609044-17761546	2	No	No
BIG-lncRNA-1425	BIG-lncRNA-1425.1	chr16	+	18254426-18409340	2	No	No
BIG-lncRNA-1426	BIG-lncRNA-1426.1	chr16	+	18371705-18373156	2	No	No
BIG-lncRNA-1427	BIG-lncRNA-1427.1	chr16	-	21508589-21508963	2	No	No
BIG-lncRNA-1428	BIG-lncRNA-1428.1	chr16	+	25296237-25300521	2	No	No
BIG-lncRNA-1429	BIG-lncRNA-1429.1	chr16	+	28644777-28646699	2	No	No
BIG-lncRNA-1430	BIG-lncRNA-1430.1	chr16	+	29194344-29263609	2	No	No
BIG-lncRNA-1431	BIG-lncRNA-1431.1	chr16	-	31125950-31128827	1	Yes	Yes
BIG-lncRNA-1432	BIG-lncRNA-1432.1	chr16	+	33046728-33047558	2	No	No
BIG-lncRNA-1433	BIG-lncRNA-1433.1	chr16	-	33089217-33095968	2	No	No
BIG-lncRNA-1434	BIG-lncRNA-1434.1	chr16	-	57886508-57888140	2	No	No
BIG-lncRNA-1435	BIG-lncRNA-1435.1	chr16	-	58548784-58549352	1	Yes	Yes
BIG-lncRNA-1435	BIG-lncRNA-1435.2	chr16	-	58548803-58549352	1	Yes	Yes
BIG-lncRNA-1436	BIG-lncRNA-1436.1	chr16	+	61918241-61922505	2	No	No
BIG-lncRNA-1437	BIG-lncRNA-1437.1	chr16	+	65807650-65809184	2	No	No
BIG-lncRNA-1438	BIG-lncRNA-1438.1	chr16	+	71966710-71971498	1	Yes	Yes
BIG-lncRNA-1438	BIG-lncRNA-1438.2	chr16	+	71966710-71970757	1	Yes	Yes
BIG-lncRNA-1438	BIG-lncRNA-1438.3	chr16	+	71966710-71971509	1	Yes	Yes
BIG-lncRNA-1439	BIG-lncRNA-1439.1	chr16	+	80058969-80060701	2	No	No
BIG-lncRNA-1440	BIG-lncRNA-1440.1	chr16	-	81101047-81102379	2	No	No
BIG-lncRNA-1441	BIG-lncRNA-1441.1	chr16	+	81427826-81434056	2	No	No
BIG-lncRNA-1442	BIG-lncRNA-1442.1	chr16	+	85432330-85433153	2	No	No
BIG-lncRNA-1443	BIG-lncRNA-1443.1	chr16	+	85433754-85434705	2	No	No
BIG-lncRNA-1444	BIG-lncRNA-1444.1	chr16	+	85438157-85444613	2	No	No
BIG-lncRNA-1445	BIG-lncRNA-1445.1	chr16	+	86989819-86994984	2	No	No
BIG-lncRNA-1446	BIG-lncRNA-1446.1	chr16	-	87157964-87158576	2	No	No
BIG-lncRNA-1447	BIG-lncRNA-1447.1	chr16	+	87176930-87256182	2	No	No
BIG-lncRNA-1448	BIG-lncRNA-1448.1	chr16	-	87236058-87241246	3	No	No
BIG-lncRNA-1448	BIG-lncRNA-1448.2	chr16	-	87236058-87241246	3	No	No
BIG-lncRNA-1449	BIG-lncRNA-1449.1	chr16	+	88311652-88314134	2	No	No
BIG-lncRNA-1450	BIG-lncRNA-1450.1	chr16	-	88446806-88447949	2	No	No
BIG-lncRNA-1451	BIG-lncRNA-1451.1	chr17	+	265729-266944	2	No	No
BIG-lncRNA-1452	BIG-lncRNA-1452.1	chr17	-	2215052-2220499	1	Yes	Yes
BIG-lncRNA-1452	BIG-lncRNA-1452.2	chr17	-	2219603-2220499	1	Yes	Yes
BIG-lncRNA-1453	BIG-lncRNA-1453.1	chr17	-	4998450-5000952	2	No	Yes
BIG-lncRNA-1454	BIG-lncRNA-1454.1	chr17	+	10332939-10401764	2	No	No
BIG-lncRNA-1455	BIG-lncRNA-1455.1	chr17	-	10568806-10570616	2	No	No
BIG-lncRNA-1456	BIG-lncRNA-1456.1	chr17	-	14202121-14204125	1	Yes	Yes
BIG-lncRNA-1457	BIG-lncRNA-1457.1	chr17	+	14403401-14407173	2	No	No
BIG-lncRNA-1458	BIG-lncRNA-1458.1	chr17	+	16921820-16926727	3	No	No
BIG-lncRNA-1459	BIG-lncRNA-1459.1	chr17	+	17655719-17657988	2	Yes	Yes
BIG-lncRNA-1460	BIG-lncRNA-1460.1	chr17	-	18727787-18732418	2	No	No
BIG-lncRNA-1461	BIG-lncRNA-1461.1	chr17	-	21983819-22022951	2	No	No
BIG-lncRNA-1462	BIG-lncRNA-1462.1	chr17	-	22247414-22255112	2	No	No
BIG-lncRNA-1463	BIG-lncRNA-1463.1	chr17	+	26828286-26829761	2	No	No
BIG-lncRNA-1464	BIG-lncRNA-1464.1	chr17	-	26857259-26862241	2	No	No
BIG-lncRNA-1465	BIG-lncRNA-1465.1	chr17	-	27222305-27223844	1	Yes	Yes
BIG-lncRNA-1465	BIG-lncRNA-1465.2	chr17	-	27222305-27224070	1	Yes	Yes
BIG-lncRNA-1466	BIG-lncRNA-1466.1	chr17	+	27621402-27623055	2	Yes	No
BIG-lncRNA-1467	BIG-lncRNA-1467.1	chr17	-	28973481-28994658	2	No	No
BIG-lncRNA-1468	BIG-lncRNA-1468.1	chr17	-	34726951-34730218	2	No	No
BIG-lncRNA-1469	BIG-lncRNA-1469.1	chr17	-	36318510-36321972	2	No	No
BIG-lncRNA-1470	BIG-lncRNA-1470.1	chr17	+	38468864-38470031	2	Yes	No
BIG-lncRNA-1471	BIG-lncRNA-1471.1	chr17	+	41466035-41466574	1	Yes	Yes
BIG-lncRNA-1471	BIG-lncRNA-1471.2	chr17	+	41466035-41466689	1	Yes	Yes
BIG-lncRNA-1472	BIG-lncRNA-1472.1	chr17	-	43224094-43225539	1	Yes	Yes
BIG-lncRNA-1473	BIG-lncRNA-1473.1	chr17	-	44102128-44104432	2	No	No
BIG-lncRNA-1474	BIG-lncRNA-1474.1	chr17	-	45726164-45726660	1	Yes	Yes
BIG-lncRNA-1475	BIG-lncRNA-1475.1	chr17	-	59747453-59749057	2	No	No
BIG-lncRNA-1476	BIG-lncRNA-1476.1	chr17	-	61625979-61627705	2	No	Yes
BIG-lncRNA-1477	BIG-lncRNA-1477.1	chr17	+	62473934-62481872	4	No	No
BIG-lncRNA-1478	BIG-lncRNA-1478.1	chr17	-	62725342-62727778	2	No	No
BIG-lncRNA-1479	BIG-lncRNA-1479.1	chr17	-	65819968-65821128	2	No	No
BIG-lncRNA-1480	BIG-lncRNA-1480.1	chr17	+	66374723-66376820	1	Yes	Yes
BIG-lncRNA-1480	BIG-lncRNA-1480.2	chr17	+	66375593-66376820	1	Yes	Yes
BIG-lncRNA-1481	BIG-lncRNA-1481.1	chr17	-	71603818-71605875	2	No	No
BIG-lncRNA-1482	BIG-lncRNA-1482.1	chr17	-	71609787-71610548	2	No	No
BIG-lncRNA-1483	BIG-lncRNA-1483.1	chr17	+	76473893-76474771	2	Yes	No
BIG-lncRNA-1484	BIG-lncRNA-1484.1	chr17	-	77663837-77665467	2	No	No
BIG-lncRNA-1485	BIG-lncRNA-1485.1	chr18	-	824385-825097	2	No	No
BIG-lncRNA-1486	BIG-lncRNA-1486.1	chr18	-	1403544-1404749	2	No	No
BIG-lncRNA-1487	BIG-lncRNA-1487.1	chr18	-	1513843-1522426	3	No	No
BIG-lncRNA-1487	BIG-lncRNA-1487.2	chr18	-	1513843-1522426	2	No	No
BIG-lncRNA-1488	BIG-lncRNA-1488.1	chr18	+	1692145-1695048	2	No	No
BIG-lncRNA-1489	BIG-lncRNA-1489.1	chr18	+	2854571-2856183	2	No	No
BIG-lncRNA-1490	BIG-lncRNA-1490.1	chr18	-	3225366-3227033	2	No	No
BIG-lncRNA-1491	BIG-lncRNA-1491.1	chr18	+	3996825-3997689	2	No	No
BIG-lncRNA-1492	BIG-lncRNA-1492.1	chr18	+	4534829-4538953	2	No	No
BIG-lncRNA-1493	BIG-lncRNA-1493.1	chr18	-	5017585-5031214	2	No	No
BIG-lncRNA-1494	BIG-lncRNA-1494.1	chr18	+	6724715-6725105	2	No	No
BIG-lncRNA-1495	BIG-lncRNA-1495.1	chr18	-	9436411-9441241	2	No	No
BIG-lncRNA-1496	BIG-lncRNA-1496.1	chr18	+	14259370-14325377	3	No	No
BIG-lncRNA-1497	BIG-lncRNA-1497.1	chr18	+	14263826-14289961	3	No	No
BIG-lncRNA-1498	BIG-lncRNA-1498.1	chr18	+	14264418-14300365	3	No	No
BIG-lncRNA-1499	BIG-lncRNA-1499.1	chr18	+	14265893-14333969	2	No	No
BIG-lncRNA-1500	BIG-lncRNA-1500.1	chr18	+	14269471-14302484	2	No	No
BIG-lncRNA-1501	BIG-lncRNA-1501.1	chr18	+	14282113-14318218	2	No	No
BIG-lncRNA-1502	BIG-lncRNA-1502.1	chr18	-	15235691-15242718	3	No	No
BIG-lncRNA-1503	BIG-lncRNA-1503.1	chr18	-	15237103-15242261	2	No	No
BIG-lncRNA-1504	BIG-lncRNA-1504.1	chr18	-	15389069-15409072	3	No	No
BIG-lncRNA-1505	BIG-lncRNA-1505.1	chr18	-	15400410-15404588	2	No	No
BIG-lncRNA-1506	BIG-lncRNA-1506.1	chr18	-	15406525-15406965	2	No	No
BIG-lncRNA-1507	BIG-lncRNA-1507.1	chr18	-	24706121-24708606	2	No	No
BIG-lncRNA-1508	BIG-lncRNA-1508.1	chr18	-	28864160-28867605	2	No	No
BIG-lncRNA-1509	BIG-lncRNA-1509.1	chr18	+	29399310-29410085	2	Yes	No
BIG-lncRNA-1510	BIG-lncRNA-1510.1	chr18	-	31772335-31774731	2	No	No
BIG-lncRNA-1511	BIG-lncRNA-1511.1	chr18	+	37571680-37573387	2	No	No
BIG-lncRNA-1512	BIG-lncRNA-1512.1	chr18	-	39142750-39143934	2	No	No
BIG-lncRNA-1513	BIG-lncRNA-1513.1	chr18	+	43971601-43972356	2	No	No
BIG-lncRNA-1514	BIG-lncRNA-1514.1	chr18	+	71380266-71383101	2	No	No
BIG-lncRNA-1514	BIG-lncRNA-1514.2	chr18	+	71380266-71383101	3	No	No
BIG-lncRNA-1515	BIG-lncRNA-1515.1	chr18	+	75238382-75239654	3	No	No
BIG-lncRNA-1516	BIG-lncRNA-1516.1	chr18	-	76366165-76366533	2	No	No
BIG-lncRNA-1517	BIG-lncRNA-1517.1	chr18	+	76774252-76776753	2	No	No
BIG-lncRNA-1518	BIG-lncRNA-1518.1	chr18	-	76826507-76829190	2	No	No
BIG-lncRNA-1519	BIG-lncRNA-1519.1	chr19	-	251918-253260	2	No	No
BIG-lncRNA-1520	BIG-lncRNA-1520.1	chr19	+	1699119-1782344	2	No	No
BIG-lncRNA-1521	BIG-lncRNA-1521.1	chr19	+	2355705-2357320	2	No	No
[truncated: 224 more rows]
