# Supplementary material for: High-confidence coding and noncoding transcriptome maps
Source: HighWire-hosted journal article supplement (doi:10.1101/gr.214288.116), 2017-04-10
Supplement: Supplemental_Table_S9.xlsx [file Supplemental_Table_S9.xlsx]

## Sheet: Table S9
Table S9. Data pointers
File Type	File Name	Format	Data Source	Organism	Sample Type	Sample Origin	Replicate	Read Type	URLs	Description
Source code	CAFE.1.0.1	.tar.gz	・	・	・	・	・	・	http://big.hanyang.ac.kr/downloads/datasets/Programs/CAFE.1.0.1.tar.gz	CAFE source code
Manual	CAFE_manual	.docx	・	・	・	・	・	・	http://big.hanyang.ac.kr/downloads/datasets/Programs/CAFE_manual.docx	CAFE manual
RPDs	ENCODE_GM12878_2x75_200_Rep1	.bam, .bai	ENCODE	Homo sapiens	Cell line	B-lymphocytes	1	Paired-end	http://big.hanyang.ac.kr/downloads/datasets/RPDs/ENCODE/GM12878/ENCODE_GM12878_2x75_200_Rep1.bam	A bam file of RPDs generated from ENCODE unstranded RNA-seq reads (GEO accession number: GSM958728)
RPDs	ENCODE_GM12878_2x75_200_Rep2	.bam, .bai	ENCODE	Homo sapiens	Cell line	B-lymphocytes	2	Paired-end	http://big.hanyang.ac.kr/downloads/datasets/RPDs/ENCODE/GM12878/ENCODE_GM12878_2x75_200_Rep2.bam	A bam file of RPDs generated from ENCODE unstranded RNA-seq reads (GEO accession number: GSM958728)
RPDs	ENCODE_GM12878_2x75_400_Rep2	.bam, .bai	ENCODE	Homo sapiens	Cell line	B-lymphocytes	2	Paired-end	http://big.hanyang.ac.kr/downloads/datasets/RPDs/ENCODE/GM12878/ENCODE_GM12878_2x75_400_Rep2.bam	A bam file of RPDs generated from ENCODE unstranded RNA-seq reads (GEO accession number: GSM958728)
RPDs	ENCODE_GM12891_2x75_200_Rep1	.bam, .bai	ENCODE	Homo sapiens	Cell line	B-lymphocytes	1	Paired-end	http://big.hanyang.ac.kr/downloads/datasets/RPDs/ENCODE/GM12891/ENCODE_GM12891_2x75_200_Rep1.bam	A bam file of RPDs generated from ENCODE unstranded RNA-seq reads (GEO accession number: GSM958747)
RPDs	ENCODE_GM12891_2x75_200_Rep2	.bam, .bai	ENCODE	Homo sapiens	Cell line	B-lymphocytes	2	Paired-end	http://big.hanyang.ac.kr/downloads/datasets/RPDs/ENCODE/GM12891/ENCODE_GM12891_2x75_200_Rep2.bam	A bam file of RPDs generated from ENCODE unstranded RNA-seq reads (GEO accession number: GSM958747)
RPDs	ENCODE_GM12892_2x75_200_Rep1	.bam, .bai	ENCODE	Homo sapiens	Cell line	B-lymphocytes	1	Paired-end	http://big.hanyang.ac.kr/downloads/datasets/RPDs/ENCODE/GM12892/ENCODE_GM12892_2x75_200_Rep1.bam	A bam file of RPDs generated from ENCODE unstranded RNA-seq reads (GEO accession number: GSM958748)
RPDs	ENCODE_GM12892_2x75_200_Rep2	.bam, .bai	ENCODE	Homo sapiens	Cell line	B-lymphocytes	2	Paired-end	http://big.hanyang.ac.kr/downloads/datasets/RPDs/ENCODE/GM12892/ENCODE_GM12892_2x75_200_Rep2.bam	A bam file of RPDs generated from ENCODE unstranded RNA-seq reads (GEO accession number: GSM958748)
RPDs	ENCODE_GM12892_2x75_200_Rep3	.bam, .bai	ENCODE	Homo sapiens	Cell line	B-lymphocytes	3	Paired-end	http://big.hanyang.ac.kr/downloads/datasets/RPDs/ENCODE/GM12892/ENCODE_GM12892_2x75_200_Rep3.bam	A bam file of RPDs generated from ENCODE unstranded RNA-seq reads (GEO accession number: GSM958748)
RPDs	ENCODE_H1-hESC_2x75_200_Rep1	.bam, .bai	ENCODE	Homo sapiens	Cell line	Embryonic stem cells	1	Paired-end	http://big.hanyang.ac.kr/downloads/datasets/RPDs/ENCODE/H1-hESC/ENCODE_H1-hESC_2x75_200_Rep1.bam	A bam file of RPDs generated from ENCODE unstranded RNA-seq reads (GEO accession number:GSM958733)
RPDs	ENCODE_H1-hESC_2x75_200_Rep2	.bam, .bai	ENCODE	Homo sapiens	Cell line	Embryonic stem cells	2	Paired-end	http://big.hanyang.ac.kr/downloads/datasets/RPDs/ENCODE/H1-hESC/ENCODE_H1-hESC_2x75_200_Rep2.bam	A bam file of RPDs generated from ENCODE unstranded RNA-seq reads (GEO accession number:GSM958733)
RPDs	ENCODE_H1-hESC_2x75_200_Rep3	.bam, .bai	ENCODE	Homo sapiens	Cell line	Embryonic stem cells	3	Paired-end	http://big.hanyang.ac.kr/downloads/datasets/RPDs/ENCODE/H1-hESC/ENCODE_H1-hESC_2x75_200_Rep3.bam	A bam file of RPDs generated from ENCODE unstranded RNA-seq reads (GEO accession number:GSM958733)
RPDs	ENCODE_H1-hESC_2x75_200_Rep4	.bam, .bai	ENCODE	Homo sapiens	Cell line	Embryonic stem cells	4	Paired-end	http://big.hanyang.ac.kr/downloads/datasets/RPDs/ENCODE/H1-hESC/ENCODE_H1-hESC_2x75_200_Rep4.bam	A bam file of RPDs generated from ENCODE unstranded RNA-seq reads (GEO accession number:GSM958733)
RPDs	ENCODE_H1-hESC_2x75_400_Rep1	.bam, .bai	ENCODE	Homo sapiens	Cell line	Embryonic stem cells	1	Paired-end	http://big.hanyang.ac.kr/downloads/datasets/RPDs/ENCODE/H1-hESC/ENCODE_H1-hESC_2x75_400_Rep1.bam	A bam file of RPDs generated from ENCODE unstranded RNA-seq reads (GEO accession number:GSM958733)
RPDs	ENCODE_HeLa-S3_2x75_200_Rep1	.bam, .bai	ENCODE	Homo sapiens	Cell line	Skeletal muscle myoblasts	1	Paired-end	http://big.hanyang.ac.kr/downloads/datasets/RPDs/ENCODE/HSMM/ENCODE_HSMM_2x75_200_Rep1.bam	A bam file of RPDs generated from ENCODE unstranded RNA-seq reads (GEO accession number: GSM958744)
RPDs	ENCODE_HeLa-S3_2x75_200_Rep2	.bam, .bai	ENCODE	Homo sapiens	Cell line	Skeletal muscle myoblasts	2	Paired-end	http://big.hanyang.ac.kr/downloads/datasets/RPDs/ENCODE/HSMM/ENCODE_HSMM_2x75_200_Rep2.bam	A bam file of RPDs generated from ENCODE unstranded RNA-seq reads (GEO accession number: GSM958744)
RPDs	ENCODE_HepG2_2x75_200_Rep1	.bam, .bai	ENCODE	Homo sapiens	Cell line	Umbilical vein endothelial cells	1	Paired-end	http://big.hanyang.ac.kr/downloads/datasets/RPDs/ENCODE/HUVEC/ENCODE_HUVEC_2x75_200_Rep1.bam	A bam file of RPDs generated from ENCODE unstranded RNA-seq reads (GEO accession number: GSM958734)
RPDs	ENCODE_HepG2_2x75_200_Rep2	.bam, .bai	ENCODE	Homo sapiens	Cell line	Umbilical vein endothelial cells	2	Paired-end	http://big.hanyang.ac.kr/downloads/datasets/RPDs/ENCODE/HUVEC/ENCODE_HUVEC_2x75_200_Rep2.bam	A bam file of RPDs generated from ENCODE unstranded RNA-seq reads (GEO accession number: GSM958734)
RPDs	ENCODE_HSMM_2x75_200_Rep1	.bam, .bai	ENCODE	Homo sapiens	Cell line	Cervical cancer cells	1	Paired-end	http://big.hanyang.ac.kr/downloads/datasets/RPDs/ENCODE/HeLa-S3/ENCODE_HeLa-S3_2x75_200_Rep1.bam	A bam file of RPDs generated from ENCODE unstranded RNA-seq reads (GEO accession number: GSM958735)
RPDs	ENCODE_HSMM_2x75_200_Rep2	.bam, .bai	ENCODE	Homo sapiens	Cell line	Cervical cancer cells	2	Paired-end	http://big.hanyang.ac.kr/downloads/datasets/RPDs/ENCODE/HeLa-S3/ENCODE_HeLa-S3_2x75_200_Rep2.bam	A bam file of RPDs generated from ENCODE unstranded RNA-seq reads (GEO accession number: GSM958735)
RPDs	ENCODE_HUVEC_2x75_200_Rep1	.bam, .bai	ENCODE	Homo sapiens	Cell line	Liver cancer cells	1	Paired-end	http://big.hanyang.ac.kr/downloads/datasets/RPDs/ENCODE/HepG2/ENCODE_HepG2_2x75_200_Rep1.bam	A bam file of RPDs generated from ENCODE unstranded RNA-seq reads (GEO accession number: GSM958732)
RPDs	ENCODE_HUVEC_2x75_200_Rep2	.bam, .bai	ENCODE	Homo sapiens	Cell line	Liver cancer cells	2	Paired-end	http://big.hanyang.ac.kr/downloads/datasets/RPDs/ENCODE/HepG2/ENCODE_HepG2_2x75_200_Rep2.bam	A bam file of RPDs generated from ENCODE unstranded RNA-seq reads (GEO accession number: GSM958732)
RPDs	ENCODE_K562_2x75_200_Rep1	.bam, .bai	ENCODE	Homo sapiens	Cell line	Myelogenous leukemia cells	1	Paired-end	http://big.hanyang.ac.kr/downloads/datasets/RPDs/ENCODE/K562/ENCODE_K562_2x75_200_Rep1.bam	A bam file of RPDs generated from ENCODE unstranded RNA-seq reads (GEO accession number: GSM958729)
RPDs	ENCODE_K562_2x75_200_Rep2	.bam, .bai	ENCODE	Homo sapiens	Cell line	Myelogenous leukemia cells	2	Paired-end	http://big.hanyang.ac.kr/downloads/datasets/RPDs/ENCODE/K562/ENCODE_K562_2x75_200_Rep2.bam	A bam file of RPDs generated from ENCODE unstranded RNA-seq reads (GEO accession number: GSM958729)
RPDs	ENCODE_MCF-7_2x75_200_Rep1	.bam, .bai	ENCODE	Homo sapiens	Cell line	Breast cancer cells	1	Paired-end	http://big.hanyang.ac.kr/downloads/datasets/RPDs/ENCODE/MCF-7/ENCODE_MCF-7_2x75_200_Rep1.bam	A bam file of RPDs generated from ENCODE unstranded RNA-seq reads (GEO accession number: GSM958745)
RPDs	ENCODE_MCF-7_2x75_200_Rep2	.bam, .bai	ENCODE	Homo sapiens	Cell line	Breast cancer cells	2	Paired-end	http://big.hanyang.ac.kr/downloads/datasets/RPDs/ENCODE/MCF-7/ENCODE_MCF-7_2x75_200_Rep2.bam	A bam file of RPDs generated from ENCODE unstranded RNA-seq reads (GEO accession number: GSM958745)
RPDs	ENCODE_MCF-7_2x75_200_Rep3	.bam, .bai	ENCODE	Homo sapiens	Cell line	Breast cancer cells	3	Paired-end	http://big.hanyang.ac.kr/downloads/datasets/RPDs/ENCODE/MCF-7/ENCODE_MCF-7_2x75_200_Rep3.bam	A bam file of RPDs generated from ENCODE unstranded RNA-seq reads (GEO accession number: GSM958745)
RPDs	ENCODE_NHEK_2x75_200_Rep1	.bam, .bai	ENCODE	Homo sapiens	Cell line	Epidermal keratinocytes	1	Paired-end	http://big.hanyang.ac.kr/downloads/datasets/RPDs/ENCODE/NHEK/ENCODE_NHEK_2x75_200_Rep1.bam	A bam file of RPDs generated from ENCODE unstranded RNA-seq reads (GEO accession number: GSM958736)
RPDs	ENCODE_NHEK_2x75_200_Rep2	.bam, .bai	ENCODE	Homo sapiens	Cell line	Epidermal keratinocytes	2	Paired-end	http://big.hanyang.ac.kr/downloads/datasets/RPDs/ENCODE/NHEK/ENCODE_NHEK_2x75_200_Rep2.bam	A bam file of RPDs generated from ENCODE unstranded RNA-seq reads (GEO accession number: GSM958736)
RPDs	ENCODE_NHLF_2x75_200_Rep1	.bam, .bai	ENCODE	Homo sapiens	Cell line	Lung fibroblasts	1	Paired-end	http://big.hanyang.ac.kr/downloads/datasets/RPDs/ENCODE/NHLF/ENCODE_NHLF_2x75_200_Rep1.bam	A bam file of RPDs generated from ENCODE unstranded RNA-seq reads (GEO accession number: GSM958746)
RPDs	ENCODE_NHLF_2x75_200_Rep2	.bam, .bai	ENCODE	Homo sapiens	Cell line	Lung fibroblasts	2	Paired-end	http://big.hanyang.ac.kr/downloads/datasets/RPDs/ENCODE/NHLF/ENCODE_NHLF_2x75_200_Rep2.bam	A bam file of RPDs generated from ENCODE unstranded RNA-seq reads (GEO accession number: GSM958746)
RPDs	Human_BodyMap_Adipose_single_end	.bam, .bai	Human BodyMap 2.0	Homo sapiens	Tissue	Adipose	1	Single-end	http://big.hanyang.ac.kr/downloads/datasets/RPDs/Human_BodyMap/Adipose/Human_BodyMap_Adipose_single_end.bam	A bam file of RPDs generated from Human BodyMap 2.0 unstranded RNA-seq reads (GEO accession number: GSM759490)
RPDs	Human_BodyMap_Adipose_paired_end	.bam, .bai	Human BodyMap 2.0	Homo sapiens	Tissue	Adipose	1	Paired-end	http://big.hanyang.ac.kr/downloads/datasets/RPDs/Human_BodyMap/Adipose/Human_BodyMap_Adipose_paired_end.bam	A bam file of RPDs generated from Human BodyMap 2.0 unstranded RNA-seq reads (GEO accession number: GSM759491)
RPDs	Human_BodyMap_Adrenal_single_end	.bam, .bai	Human BodyMap 2.0	Homo sapiens	Tissue	Adrenal	1	Single-end	http://big.hanyang.ac.kr/downloads/datasets/RPDs/Human_BodyMap/Adrenal/Human_BodyMap_Adrenal_single_end.bam	A bam file of RPDs generated from Human BodyMap 2.0 unstranded RNA-seq reads (GEO accession number: GSM759492)
RPDs	Human_BodyMap_Adrenal_paired_end	.bam, .bai	Human BodyMap 2.0	Homo sapiens	Tissue	Adrenal	1	Paired-end	http://big.hanyang.ac.kr/downloads/datasets/RPDs/Human_BodyMap/Adrenal/Human_BodyMap_Adrenal_paired_end.bam	A bam file of RPDs generated from Human BodyMap 2.0 unstranded RNA-seq reads (GEO accession number: GSM759493)
RPDs	Human_BodyMap_Brain_single_end	.bam, .bai	Human BodyMap 2.0	Homo sapiens	Tissue	Brain	1	Single-end	http://big.hanyang.ac.kr/downloads/datasets/RPDs/Human_BodyMap/Brain/Human_BodyMap_Brain_single_end.bam	A bam file of RPDs generated from Human BodyMap 2.0 unstranded RNA-seq reads (GEO accession number: GSM759494)
RPDs	Human_BodyMap_Brain_paired_end	.bam, .bai	Human BodyMap 2.0	Homo sapiens	Tissue	Brain	1	Paired-end	http://big.hanyang.ac.kr/downloads/datasets/RPDs/Human_BodyMap/Brain/Human_BodyMap_Brain_paired_end.bam	A bam file of RPDs generated from Human BodyMap 2.0 unstranded RNA-seq reads (GEO accession number: GSM759495)
RPDs	Human_BodyMap_Breast_single_end	.bam, .bai	Human BodyMap 2.0	Homo sapiens	Tissue	Breast	1	Single-end	http://big.hanyang.ac.kr/downloads/datasets/RPDs/Human_BodyMap/Breast/Human_BodyMap_Breast_single_end.bam	A bam file of RPDs generated from Human BodyMap 2.0 unstranded RNA-seq reads (GEO accession number: GSM759496)
RPDs	Human_BodyMap_Breast_paired_end	.bam, .bai	Human BodyMap 2.0	Homo sapiens	Tissue	Breast	1	Paired-end	http://big.hanyang.ac.kr/downloads/datasets/RPDs/Human_BodyMap/Breast/Human_BodyMap_Breast_paired_end.bam	A bam file of RPDs generated from Human BodyMap 2.0 unstranded RNA-seq reads (GEO accession number: GSM759497)
RPDs	Human_BodyMap_Colon_single_end	.bam, .bai	Human BodyMap 2.0	Homo sapiens	Tissue	Colon	1	Single-end	http://big.hanyang.ac.kr/downloads/datasets/RPDs/Human_BodyMap/Colon/Human_BodyMap_Colon_single_end.bam	A bam file of RPDs generated from Human BodyMap 2.0 unstranded RNA-seq reads (GEO accession number: GSM759498)
RPDs	Human_BodyMap_Colon_paired_end	.bam, .bai	Human BodyMap 2.0	Homo sapiens	Tissue	Colon	1	Paired-end	http://big.hanyang.ac.kr/downloads/datasets/RPDs/Human_BodyMap/Colon/Human_BodyMap_Colon_paired_end.bam	A bam file of RPDs generated from Human BodyMap 2.0 unstranded RNA-seq reads (GEO accession number: GSM759499)
RPDs	Human_BodyMap_Heart_single_end	.bam, .bai	Human BodyMap 2.0	Homo sapiens	Tissue	Heart	1	Single-end	http://big.hanyang.ac.kr/downloads/datasets/RPDs/Human_BodyMap/Heart/Human_BodyMap_Heart_single_end.bam	A bam file of RPDs generated from Human BodyMap 2.0 unstranded RNA-seq reads (GEO accession number: GSM759500)
RPDs	Human_BodyMap_Heart_paired_end	.bam, .bai	Human BodyMap 2.0	Homo sapiens	Tissue	Heart	1	Paired-end	http://big.hanyang.ac.kr/downloads/datasets/RPDs/Human_BodyMap/Heart/Human_BodyMap_Heart_paired_end.bam	A bam file of RPDs generated from Human BodyMap 2.0 unstranded RNA-seq reads (GEO accession number: GSM759501)
RPDs	Human_BodyMap_Kidney_single_end	.bam, .bai	Human BodyMap 2.0	Homo sapiens	Tissue	Kidney	1	Single-end	http://big.hanyang.ac.kr/downloads/datasets/RPDs/Human_BodyMap/Kidney/Human_BodyMap_Kidney_single_end.bam	A bam file of RPDs generated from Human BodyMap 2.0 unstranded RNA-seq reads (GEO accession number: GSM759502)
RPDs	Human_BodyMap_Kidney_paired_end	.bam, .bai	Human BodyMap 2.0	Homo sapiens	Tissue	Kidney	1	Paired-end	http://big.hanyang.ac.kr/downloads/datasets/RPDs/Human_BodyMap/Kidney/Human_BodyMap_Kidney_paired_end.bam	A bam file of RPDs generated from Human BodyMap 2.0 unstranded RNA-seq reads (GEO accession number: GSM759503)
RPDs	Human_BodyMap_Liver_single_end	.bam, .bai	Human BodyMap 2.0	Homo sapiens	Tissue	Liver	1	Single-end	http://big.hanyang.ac.kr/downloads/datasets/RPDs/Human_BodyMap/Liver/Human_BodyMap_Liver_single_end.bam	A bam file of RPDs generated from Human BodyMap 2.0 unstranded RNA-seq reads (GEO accession number: GSM759504)
RPDs	Human_BodyMap_Liver_paired_end	.bam, .bai	Human BodyMap 2.0	Homo sapiens	Tissue	Liver	1	Paired-end	http://big.hanyang.ac.kr/downloads/datasets/RPDs/Human_BodyMap/Liver/Human_BodyMap_Liver_paired_end.bam	A bam file of RPDs generated from Human BodyMap 2.0 unstranded RNA-seq reads (GEO accession number: GSM759505)
RPDs	Human_BodyMap_Lung_single_end	.bam, .bai	Human BodyMap 2.0	Homo sapiens	Tissue	Lung	1	Single-end	http://big.hanyang.ac.kr/downloads/datasets/RPDs/Human_BodyMap/Lung/Human_BodyMap_Lung_single_end.bam	A bam file of RPDs generated from Human BodyMap 2.0 unstranded RNA-seq reads (GEO accession number: GSM759506)
RPDs	Human_BodyMap_Lung_paired_end	.bam, .bai	Human BodyMap 2.0	Homo sapiens	Tissue	Lung	1	Paired-end	http://big.hanyang.ac.kr/downloads/datasets/RPDs/Human_BodyMap/Lung/Human_BodyMap_Lung_paired_end.bam	A bam file of RPDs generated from Human BodyMap 2.0 unstranded RNA-seq reads (GEO accession number: GSM759507)
RPDs	Human_BodyMap_LymphNode_single_end	.bam, .bai	Human BodyMap 2.0	Homo sapiens	Tissue	LymphNode	1	Single-end	http://big.hanyang.ac.kr/downloads/datasets/RPDs/Human_BodyMap/LymphNode/Human_BodyMap_LymphNode_single_end.bam	A bam file of RPDs generated from Human BodyMap 2.0 unstranded RNA-seq reads (GEO accession number: GSM759508)
RPDs	Human_BodyMap_LymphNode_paired_end	.bam, .bai	Human BodyMap 2.0	Homo sapiens	Tissue	LymphNode	1	Paired-end	http://big.hanyang.ac.kr/downloads/datasets/RPDs/Human_BodyMap/LymphNode/Human_BodyMap_LymphNode_paired_end.bam	A bam file of RPDs generated from Human BodyMap 2.0 unstranded RNA-seq reads (GEO accession number: GSM759509)
RPDs	Human_BodyMap_Ovary_single_end	.bam, .bai	Human BodyMap 2.0	Homo sapiens	Tissue	Ovary	1	Single-end	http://big.hanyang.ac.kr/downloads/datasets/RPDs/Human_BodyMap/Ovary/Human_BodyMap_Ovary_single_end.bam	A bam file of RPDs generated from Human BodyMap 2.0 unstranded RNA-seq reads (GEO accession number: GSM759510)
RPDs	Human_BodyMap_Ovary_paired_end	.bam, .bai	Human BodyMap 2.0	Homo sapiens	Tissue	Ovary	1	Paired-end	http://big.hanyang.ac.kr/downloads/datasets/RPDs/Human_BodyMap/Ovary/Human_BodyMap_Ovary_paired_end.bam	A bam file of RPDs generated from Human BodyMap 2.0 unstranded RNA-seq reads (GEO accession number: GSM759511)
RPDs	Human_BodyMap_Prostate_single_end	.bam, .bai	Human BodyMap 2.0	Homo sapiens	Tissue	Prostate	1	Single-end	http://big.hanyang.ac.kr/downloads/datasets/RPDs/Human_BodyMap/Prostate/Human_BodyMap_Prostate_single_end.bam	A bam file of RPDs generated from Human BodyMap 2.0 unstranded RNA-seq reads (GEO accession number: GSM759512)
RPDs	Human_BodyMap_Prostate_paired_end	.bam, .bai	Human BodyMap 2.0	Homo sapiens	Tissue	Prostate	1	Paired-end	http://big.hanyang.ac.kr/downloads/datasets/RPDs/Human_BodyMap/Prostate/Human_BodyMap_Prostate_paired_end.bam	A bam file of RPDs generated from Human BodyMap 2.0 unstranded RNA-seq reads (GEO accession number: GSM759513)
RPDs	Human_BodyMap_SkeletalMuscle_single_end	.bam, .bai	Human BodyMap 2.0	Homo sapiens	Tissue	SkeletalMuscle	1	Single-end	http://big.hanyang.ac.kr/downloads/datasets/RPDs/Human_BodyMap/SkeletalMuscle/Human_BodyMap_SkeletalMuscle_single_end.bam	A bam file of RPDs generated from Human BodyMap 2.0 unstranded RNA-seq reads (GEO accession number: GSM759514)
RPDs	Human_BodyMap_SkeletalMuscle_paired_end	.bam, .bai	Human BodyMap 2.0	Homo sapiens	Tissue	SkeletalMuscle	1	Paired-end	http://big.hanyang.ac.kr/downloads/datasets/RPDs/Human_BodyMap/SkeletalMuscle/Human_BodyMap_SkeletalMuscle_paired_end.bam	A bam file of RPDs generated from Human BodyMap 2.0 unstranded RNA-seq reads (GEO accession number: GSM759515)
RPDs	Human_BodyMap_Testis_single_end	.bam, .bai	Human BodyMap 2.0	Homo sapiens	Tissue	Testis	1	Single-end	http://big.hanyang.ac.kr/downloads/datasets/RPDs/Human_BodyMap/Testis/Human_BodyMap_Testis_single_end.bam	A bam file of RPDs generated from Human BodyMap 2.0 unstranded RNA-seq reads (GEO accession number: GSM759516)
RPDs	Human_BodyMap_Testis_paired_end	.bam, .bai	Human BodyMap 2.0	Homo sapiens	Tissue	Testis	1	Paired-end	http://big.hanyang.ac.kr/downloads/datasets/RPDs/Human_BodyMap/Testis/Human_BodyMap_Testis_paired_end.bam	A bam file of RPDs generated from Human BodyMap 2.0 unstranded RNA-seq reads (GEO accession number: GSM759517)
RPDs	Human_BodyMap_Thyroid_single_end	.bam, .bai	Human BodyMap 2.0	Homo sapiens	Tissue	Thyroid	1	Single-end	http://big.hanyang.ac.kr/downloads/datasets/RPDs/Human_BodyMap/Thyroid/Human_BodyMap_Thyroid_single_end.bam	A bam file of RPDs generated from Human BodyMap 2.0 unstranded RNA-seq reads (GEO accession number: GSM759518)
RPDs	Human_BodyMap_Thyroid_paired_end	.bam, .bai	Human BodyMap 2.0	Homo sapiens	Tissue	Thyroid	1	Paired-end	http://big.hanyang.ac.kr/downloads/datasets/RPDs/Human_BodyMap/Thyroid/Human_BodyMap_Thyroid_paired_end.bam	A bam file of RPDs generated from Human BodyMap 2.0 unstranded RNA-seq reads (GEO accession number: GSM759519)
RPDs	Human_BodyMap_WhiteBloodCell_single_end	.bam, .bai	Human BodyMap 2.0	Homo sapiens	Tissue	WhiteBloodCell	1	Single-end	http://big.hanyang.ac.kr/downloads/datasets/RPDs/Human_BodyMap/WhiteBloodCell/Human_BodyMap_WhiteBloodCell_single_end.bam	A bam file of RPDs generated from Human BodyMap 2.0 unstranded RNA-seq reads (GEO accession number: GSM759520)
RPDs	Human_BodyMap_WhiteBloodCell_paired_end	.bam, .bai	Human BodyMap 2.0	Homo sapiens	Tissue	WhiteBloodCell	1	Paired-end	http://big.hanyang.ac.kr/downloads/datasets/RPDs/Human_BodyMap/WhiteBloodCell/Human_BodyMap_WhiteBloodCell_paired_end.bam	A bam file of RPDs generated from Human BodyMap 2.0 unstranded RNA-seq reads (GEO accession number: GSM759521)
RPDs	HeLa-S3_paired_end	.bam, .bai	GEO	Homo sapiens	Cell line	Cervical cancer cells	1	Paired-end	http://big.hanyang.ac.kr/downloads/datasets/RPDs/GEO/HeLa-S3_paired_end.bam	A bam file of RPDs generated from HeLa-S3 unstranded RNA-seq reads (GEO accession number: GSM591659 and GSM591682)
RPDs	mES_paired_end	.bam, .bai	GEO	Mus musculus	Cell line	Embryonic stem cells	1	Paired-end	http://big.hanyang.ac.kr/downloads/datasets/RPDs/GEO/mES_paired_end.bam	A bam file of RPDs generated from mES unstranded RNA-seq reads (GEO accession number: GSM2254467)
Simplified RPDs	GTEx_Brain_cerebellum.read.info	.tar	GTEx	Homo sapiens	Tissue	Brain Cerebellum	・	Paired-end	http://big.hanyang.ac.kr/downloads/datasets/RPDs/GTEx/GTEx_Brain_cerebellum.read.info.tar	Read information (read name, flag and mapping position) of RPDs generated from GTEx brain cerebellum RNA-seq reads (GTEx portal: http://www.gtexportal.org/home/)
Simplified RPDs	GTEx_Brain_cortex.read.info	.tar	GTEx	Homo sapiens	Tissue	Brain Cortex	・	Paired-end	http://big.hanyang.ac.kr/downloads/datasets/RPDs/GTEx/GTEx_Brain_cortex.read.info.tar	Read information (read name, flag and mapping position) of RPDs generated from GTEx brain cortex RNA-seq reads (GTEx portal: http://www.gtexportal.org/home/)
Simplified RPDs	GTEx_Brain_frontal_cortex.read.info	.tar	GTEx	Homo sapiens	Tissue	Brain Frontal Cortex	・	Paired-end	http://big.hanyang.ac.kr/downloads/datasets/RPDs/GTEx/GTEx_Brain_frontal_cortex.read.info.tar	Read information (read name, flag and mapping position) of RPDs generated from GTEx brain frontal cortex RNA-seq reads (GTEx portal: http://www.gtexportal.org/home/)
Simplified RPDs	GTEx_Brain_hippocampus.read.info	.tar	GTEx	Homo sapiens	Tissue	Brain Hippocampus	・	Paired-end	http://big.hanyang.ac.kr/downloads/datasets/RPDs/GTEx/GTEx_Brain_hippocampus.read.info.tar	Read information (read name, flag and mapping position) of RPDs generated from GTEx brain hippocampus RNA-seq reads (GTEx portal: http://www.gtexportal.org/home/)
Simplified RPDs	GTEx_Brain_hypothalamus.read.info	.tar	GTEx	Homo sapiens	Tissue	Brain Hypothalamus	・	Paired-end	http://big.hanyang.ac.kr/downloads/datasets/RPDs/GTEx/GTEx_Brain_hypothalamus.read.info.tar	Read information (read name, flag and mapping position) of RPDs generated from GTEx brain hypothalamus RNA-seq reads (GTEx portal: http://www.gtexportal.org/home/)
Simplified RPDs	GTEx_Esophagus_Mucosa.read.info	.tar	GTEx	Homo sapiens	Tissue	Esophagus - Mucosa	・	Paired-end	http://big.hanyang.ac.kr/downloads/datasets/RPDs/GTEx/GTEx_Esophagus_Mucosa.read.info.tar	Read information (read name, flag and mapping position) of RPDs generated from GTEx esophagus-mucosa RNA-seq reads (GTEx portal: http://www.gtexportal.org/home/)
Simplified RPDs	GTEx_Kidney.read.info	.tar	GTEx	Homo sapiens	Tissue	Kidney	・	Paired-end	http://big.hanyang.ac.kr/downloads/datasets/RPDs/GTEx/GTEx_Kidney.read.info.tar	Read information (read name, flag and mapping position) of RPDs generated from GTEx kidney RNA-seq reads (GTEx portal: http://www.gtexportal.org/home/)
Simplified RPDs	GTEx_Liver.read.info	.tar	GTEx	Homo sapiens	Tissue	Liver	・	Paired-end	http://big.hanyang.ac.kr/downloads/datasets/RPDs/GTEx/GTEx_Liver.read.info.tar	Read information (read name, flag and mapping position) of RPDs generated from GTEx liver RNA-seq reads (GTEx portal: http://www.gtexportal.org/home/)
Simplified RPDs	GTEx_Lung.read.info	.tar	GTEx	Homo sapiens	Tissue	Lung	・	Paired-end	http://big.hanyang.ac.kr/downloads/datasets/RPDs/GTEx/GTEx_Lung.read.info.tar	Read information (read name, flag and mapping position) of RPDs generated from GTEx lung RNA-seq reads (GTEx portal: http://www.gtexportal.org/home/)
Simplified RPDs	GTEx_Ovary.read.info	.tar	GTEx	Homo sapiens	Tissue	Ovary	・	Paired-end	http://big.hanyang.ac.kr/downloads/datasets/RPDs/GTEx/GTEx_Ovary.read.info.tar	Read information (read name, flag and mapping position) of RPDs generated from GTEx ovary RNA-seq reads (GTEx portal: http://www.gtexportal.org/home/)
Simplified RPDs	GTEx_Pancreas.read.info	.tar	GTEx	Homo sapiens	Tissue	Pancreas	・	Paired-end	http://big.hanyang.ac.kr/downloads/datasets/RPDs/GTEx/GTEx_Pancreas.read.info.tar	Read information (read name, flag and mapping position) of RPDs generated from GTEx pancreas RNA-seq reads (GTEx portal: http://www.gtexportal.org/home/)
Simplified RPDs	GTEx_Prostate.read.info	.tar	GTEx	Homo sapiens	Tissue	Prostate	・	Paired-end	http://big.hanyang.ac.kr/downloads/datasets/RPDs/GTEx/GTEx_Prostate.read.info.tar	Read information (read name, flag and mapping position) of RPDs generated from GTEx prostate RNA-seq reads (GTEx portal: http://www.gtexportal.org/home/)
Simplified RPDs	GTEx_Testis.read.info	.tar	GTEx	Homo sapiens	Tissue	Testis	・	Paired-end	http://big.hanyang.ac.kr/downloads/datasets/RPDs/GTEx/GTEx_Whole_blood.read.info.tar	Read information (read name, flag and mapping position) of RPDs generated from GTEx testis RNA-seq reads (GTEx portal: http://www.gtexportal.org/home/)
Simplified RPDs	GTEx_Whole_blood.read.info	.tar	GTEx	Homo sapiens	Tissue	Whole blood	・	Paired-end	http://big.hanyang.ac.kr/downloads/datasets/RPDs/GTEx/GTEx_Esophagus_Mucosa.read.info.tar	Read information (read name, flag and mapping position) of RPDs generated from GTEx whole blood RNA-seq reads (GTEx portal: http://www.gtexportal.org/home/)
Simplified RPDs	TCGA_Esophagus_Adenocarcinoma_NOS.read.info	.tar	TCGA	Homo sapiens	Tissue	Esophagus Adenocarcinoma	・	Paired-end	http://big.hanyang.ac.kr/downloads/datasets/RPDs/TCGA/TCGA_Esophagus_Adenocarcinoma_NOS.read.info.tar	Read information (read name, flag and mapping position) of RPDs generated from TCGA esophagus adenocarcinoma RNA-seq reads (TCGA portal: https://portal.gdc.cancer.gov/)
Simplified RPDs	TCGA_Esophagus_Squamous_Cell_Carcinoma.read.info	.tar	TCGA	Homo sapiens	Tissue	Esophagus Squamous Cell Carcinoma	・	Paired-end	http://big.hanyang.ac.kr/downloads/datasets/RPDs/TCGA/TCGA_Esophagus_Squamous_Cell_Carcinoma.read.info.tar	Read information (read name, flag and mapping position) of RPDs generated from TCGA esophagus squamous cell carcinoma RNA-seq reads (TCGA portal: https://portal.gdc.cancer.gov/)
Simplified RPDs	TCGA_Head_and_Neck_Squamous_Cell_Carcinoma.read.info	.tar	TCGA	Homo sapiens	Tissue	Head and Neck Squamous Cell Carcinoma	・	Paired-end	http://big.hanyang.ac.kr/downloads/datasets/RPDs/TCGA/TCGA_Head_and_Neck_Squamous_Cell_Carcinoma.read.info.tar	Read information (read name, flag and mapping position) of RPDs generated from TCGA head and neck squamous cell carcinoma RNA-seq reads (TCGA portal: https://portal.gdc.cancer.gov/)
Simplified RPDs	TCGA_Liver_Hepatocellular_Carcinoma..read.info	.tar	TCGA	Homo sapiens	Tissue	Liver Hepatocellular Carcinoma	・	Paired-end	http://big.hanyang.ac.kr/downloads/datasets/RPDs/TCGA/TCGA_Liver_Hepatocellular_Carcinoma..read.info.tar	Read information (read name, flag and mapping position) of RPDs generated from TCGA liver hepatocellular carcinoma RNA-seq reads (TCGA portal: https://portal.gdc.cancer.gov/)
Simplified RPDs	TCGA_Lung_Adenocarcinoma..read.info	.tar	TCGA	Homo sapiens	Tissue	Lung Adenocarcinoma	・	Paired-end	http://big.hanyang.ac.kr/downloads/datasets/RPDs/TCGA/TCGA_Lung_Adenocarcinoma..read.info.tar	Read information (read name, flag and mapping position) of RPDs generated from TCGA lung adenomcarcinoma RNA-seq reads (TCGA portal: https://portal.gdc.cancer.gov/)
Simplified RPDs	TCGA_Lung_Squamous_Cell_Carcinoma.read.info	.tar	TCGA	Homo sapiens	Tissue	Lung Squamous Cell Carcinoma	・	Paired-end	http://big.hanyang.ac.kr/downloads/datasets/RPDs/TCGA/TCGA_Lung_Squamous_Cell_Carcinoma.read.info.tar	Read information (read name, flag and mapping position) of RPDs generated from TCGA lung squamous cell carcinoma RNA-seq reads (TCGA portal: https://portal.gdc.cancer.gov/)
Annotation	BIGTranscriptome	.gtf	ENCODE + BodyMap + GEO	Homo sapiens	Cell line and Tissue Mix	Cell line and Tissue Mix	・	・	https://www.ncbi.nlm.nih.gov/geo/download/?acc=GSE97211&format=file&file=GSE97211%5FBIGTranscriptome%2Egtf%2Egz	A transcriptome assembly of RPDs generated from ENCODE, Human BodyMap 2.0 and GEO RNA-seq reads
Annotation	BIGTranscriptome_lncRNA_catalog	.gtf	ENCODE + BodyMap + GEO	Homo sapiens	Cell line and Tissue Mix	Cell line and Tissue Mix	・	・	https://www.ncbi.nlm.nih.gov/geo/download/?acc=GSE97211&format=file&file=GSE97211%5FBIGTranscriptome%5FlncRNA%5Fcatalog%2Egtf%2Egz	Total lncRNA set from a transcriptome assembly of RPDs generated from ENCODE, Human BodyMap 2.0 and GEO RNA-seq reads
Annotation	HeLa-S3_transcripts	.gtf	GEO	Homo sapiens	Cell line	Cervical cancer cells	・	・	https://www.ncbi.nlm.nih.gov/geo/download/?acc=GSE97211&format=file&file=GSE97211%5FHeLa%2DS3%5Ftranscripts%2Egtf%2Egz	A transcriptome assembly of RPDs generated from HeLa-S3 unstranded RNA-seq reads (GEO accession number: GSM591659 and GSM591682)
Annotation	mES_transcripts	.gtf	GEO	Mus musculus	Cell line	Embryonic stem cells	・	・	https://www.ncbi.nlm.nih.gov/geo/download/?acc=GSE97211&format=file&file=GSE97211%5FmES%5Ftranscripts%2Egtf%2Egz	A transcriptome assembly of RPDs generated from mES unstranded RNA-seq reads (GEO accession number: GSM2254467)
Annotation	BIGTranscriptome-TS_Cerebellum	.gtf	GTEx	Homo sapiens	Tissue	Brain Cerebellum	・	・	https://www.ncbi.nlm.nih.gov/geo/download/?acc=GSE97211&format=file&file=GSE97211%5FBIGTranscriptome%2DTS%5FCerebellum%2Egtf%2Egz	A transcriptome assembly of RPDs generated from GTEx brain cerebellum RNA-seq reads (GTEx portal: http://www.gtexportal.org/home/)
Annotation	BIGTranscriptome-TS_Cortex	.gtf	GTEx	Homo sapiens	Tissue	Brain Cortex	・	・	https://www.ncbi.nlm.nih.gov/geo/download/?acc=GSE97211&format=file&file=GSE97211%5FBIGTranscriptome%2DTS%5FCortex%2Egtf%2Egz	A transcriptome assembly of RPDs generated from GTEx brain cortex RNA-seq reads (GTEx portal: http://www.gtexportal.org/home/)
Annotation	BIGTranscriptome-TS_FrontalCortex	.gtf	GTEx	Homo sapiens	Tissue	Brain Frontal Cortex	・	・	https://www.ncbi.nlm.nih.gov/geo/download/?acc=GSE97211&format=file&file=GSE97211%5FBIGTranscriptome%2DTS%5FFrontalCortex%2Egtf%2Egz	A transcriptome assembly of RPDs generated from GTEx brain frontal cortex RNA-seq reads (GTEx portal: http://www.gtexportal.org/home/)
Annotation	BIGTranscriptome-TS_Hippocampus	.gtf	GTEx	Homo sapiens	Tissue	Brain Hippocampus	・	・	https://www.ncbi.nlm.nih.gov/geo/download/?acc=GSE97211&format=file&file=GSE97211%5FBIGTranscriptome%2DTS%5FHippocampus%2Egtf%2Egz	A transcriptome assembly of RPDs generated from GTEx brain hippocampus RNA-seq reads (GTEx portal: http://www.gtexportal.org/home/)
Annotation	BIGTranscriptome-TS_Hypothalamus	.gtf	GTEx	Homo sapiens	Tissue	Brain Hypothalamus	・	・	https://www.ncbi.nlm.nih.gov/geo/download/?acc=GSE97211&format=file&file=GSE97211%5FBIGTranscriptome%2DTS%5FHypothalamus%2Egtf%2Egz	A transcriptome assembly of RPDs generated from GTEx brain hypothalamus RNA-seq reads (GTEx portal: http://www.gtexportal.org/home/)
Annotation	BIGTranscriptome-TS_Esophagus	.gtf	GTEx	Homo sapiens	Tissue	Esophagus - Mucosa	・	・	https://www.ncbi.nlm.nih.gov/geo/download/?acc=GSE97211&format=file&file=GSE97211%5FBIGTranscriptome%2DTS%5FEsophagus%2Egtf%2Egz	A transcriptome assembly of RPDs generated from GTEx esophagus-mucosa RNA-seq reads (GTEx portal: http://www.gtexportal.org/home/)
Annotation	BIGTranscriptome-TS_Kidney	.gtf	GTEx	Homo sapiens	Tissue	Kidney	・	・	https://www.ncbi.nlm.nih.gov/geo/download/?acc=GSE97211&format=file&file=GSE97211%5FBIGTranscriptome%2DTS%5FKidney%2Egtf%2Egz	A transcriptome assembly of RPDs generated from GTEx kidney RNA-seq reads (GTEx portal: http://www.gtexportal.org/home/)
Annotation	BIGTranscriptome-TS_Liver	.gtf	GTEx	Homo sapiens	Tissue	Liver	・	・	https://www.ncbi.nlm.nih.gov/geo/download/?acc=GSE97211&format=file&file=GSE97211%5FBIGTranscriptome%2DTS%5FLiver%2Egtf%2Egz	A transcriptome assembly of RPDs generated from GTEx liver RNA-seq reads (GTEx portal: http://www.gtexportal.org/home/)
Annotation	BIGTranscriptome-TS_Lung	.gtf	GTEx	Homo sapiens	Tissue	Lung	・	・	https://www.ncbi.nlm.nih.gov/geo/download/?acc=GSE97211&format=file&file=GSE97211%5FBIGTranscriptome%2DTS%5FLung%2Egtf%2Egz	A transcriptome assembly of RPDs generated from GTEx lung RNA-seq reads (GTEx portal: http://www.gtexportal.org/home/)
Annotation	BIGTranscriptome-TS_Ovary	.gtf	GTEx	Homo sapiens	Tissue	Ovary	・	・	https://www.ncbi.nlm.nih.gov/geo/download/?acc=GSE97211&format=file&file=GSE97211%5FBIGTranscriptome%2DTS%5FOvary%2Egtf%2Egz	A transcriptome assembly of RPDs generated from GTEx ovary RNA-seq reads (GTEx portal: http://www.gtexportal.org/home/)
Annotation	BIGTranscriptome-TS_Pancreas	.gtf	GTEx	Homo sapiens	Tissue	Pancreas	・	・	https://www.ncbi.nlm.nih.gov/geo/download/?acc=GSE97211&format=file&file=GSE97211%5FBIGTranscriptome%2DTS%5FPancreas%2Egtf%2Egz	A transcriptome assembly of RPDs generated from GTEx pancreas RNA-seq reads (GTEx portal: http://www.gtexportal.org/home/)
Annotation	BIGTranscriptome-TS_Prostate	.gtf	GTEx	Homo sapiens	Tissue	Prostate	・	・	https://www.ncbi.nlm.nih.gov/geo/download/?acc=GSE97211&format=file&file=GSE97211%5FBIGTranscriptome%2DTS%5FProstate%2Egtf%2Egz	A transcriptome assembly of RPDs generated from GTEx prostate RNA-seq reads (GTEx portal: http://www.gtexportal.org/home/)
Annotation	BIGTranscriptome-TS_Testis	.gtf	GTEx	Homo sapiens	Tissue	Testis	・	・	https://www.ncbi.nlm.nih.gov/geo/download/?acc=GSE97211&format=file&file=GSE97211%5FBIGTranscriptome%2DTS%5FTestis%2Egtf%2Egz	A transcriptome assembly of RPDs generated from GTEx testis RNA-seq reads (GTEx portal: http://www.gtexportal.org/home/)
Annotation	BIGTranscriptome-TS_WholeBlood	.gtf	GTEx	Homo sapiens	Tissue	Whole blood	・	・	https://www.ncbi.nlm.nih.gov/geo/download/?acc=GSE97211&format=file&file=GSE97211%5FBIGTranscriptome%2DTS%5FWholeBlood%2Egtf%2Egz	A transcriptome assembly of RPDs generated from GTEx whole blood RNA-seq reads (GTEx portal: http://www.gtexportal.org/home/)
Annotation	BIGTranscriptome-TS_ESCA	.gtf	TCGA	Homo sapiens	Tissue	Esophageal Carcinoma	・	・	https://www.ncbi.nlm.nih.gov/geo/download/?acc=GSE97211&format=file&file=GSE97211%5FBIGTranscriptome%2DTS%5FESCA%2Egtf%2Egz	A transcriptome assembly of RPDs generated from TCGA esophagus carcinoma RNA-seq reads (TCGA portal: https://portal.gdc.cancer.gov/)
Annotation	BIGTranscriptome-TS_HNSC	.gtf	TCGA	Homo sapiens	Tissue	Head and Neck Squamous Cell Carcinoma	・	・	https://www.ncbi.nlm.nih.gov/geo/download/?acc=GSE97211&format=file&file=GSE97211%5FBIGTranscriptome%2DTS%5FHNSC%2Egtf%2Egz	A transcriptome assembly of RPDs generated from TCGA head and neck squamous cell carcinoma RNA-seq reads (TCGA portal: https://portal.gdc.cancer.gov/)
Annotation	BIGTranscriptome-TS_LIHC	.gtf	TCGA	Homo sapiens	Tissue	Liver Hepatocellular Carcinoma	・	・	https://www.ncbi.nlm.nih.gov/geo/download/?acc=GSE97211&format=file&file=GSE97211%5FBIGTranscriptome%2DTS%5FLIHC%2Egtf%2Egz	A transcriptome assembly of RPDs generated from TCGA liver hepatocellular carcinoma RNA-seq reads (TCGA portal: https://portal.gdc.cancer.gov/)
Annotation	BIGTranscriptome-TS_LUAD	.gtf	TCGA	Homo sapiens	Tissue	Lung Adenocarcinoma	・	・	https://www.ncbi.nlm.nih.gov/geo/download/?acc=GSE97211&format=file&file=GSE97211%5FBIGTranscriptome%2DTS%5FLUAD%2Egtf%2Egz	A transcriptome assembly of RPDs generated from TCGA lung adenomcarcinoma RNA-seq reads (TCGA portal: https://portal.gdc.cancer.gov/)
Annotation	BIGTranscriptome-TS_LUSC	.gtf	TCGA	Homo sapiens	Tissue	Lung Squamous Cell Carcinoma	・	・	https://www.ncbi.nlm.nih.gov/geo/download/?acc=GSE97211&format=file&file=GSE97211%5FBIGTranscriptome%2DTS%5FLUSC%2Egtf%2Egz	A transcriptome assembly of RPDs generated from TCGA lung squamous cell carcinoma RNA-seq reads (TCGA portal: https://portal.gdc.cancer.gov/)
Read count	ENCODE_GM12878_2x75_200_Rep1.assigned.count.txt	.txt.gz	ENCODE	Homo sapiens	Cell line	B-lymphocytes	1	Paired-end	https://www.ncbi.nlm.nih.gov/geo/download/?acc=GSE97211&format=file&file=GSE97211%5FENCODE%5FGM12878%5F2x75%5F200%5FRep1%2Eassigned%2Ecount%2Etxt%2Egz	Assigned read count of RPDs generated from ENCODE unstranded RNA-seq reads (GEO accession number: GSM958728)
Read count	ENCODE_GM12878_2x75_200_Rep2.assigned.count.txt	.txt.gz	ENCODE	Homo sapiens	Cell line	B-lymphocytes	2	Paired-end	https://www.ncbi.nlm.nih.gov/geo/download/?acc=GSE97211&format=file&file=GSE97211%5FENCODE%5FGM12878%5F2x75%5F200%5FRep2%2Eassigned%2Ecount%2Etxt%2Egz	Assigned read count of RPDs generated from ENCODE unstranded RNA-seq reads (GEO accession number: GSM958728)
Read count	ENCODE_GM12878_2x75_400_Rep2.assigned.count.txt	.txt.gz	ENCODE	Homo sapiens	Cell line	B-lymphocytes	2	Paired-end	https://www.ncbi.nlm.nih.gov/geo/download/?acc=GSE97211&format=file&file=GSE97211%5FENCODE%5FGM12878%5F2x75%5F400%5FRep2%2Eassigned%2Ecount%2Etxt%2Egz	Assigned read count of RPDs generated from ENCODE unstranded RNA-seq reads (GEO accession number: GSM958728)
Read count	ENCODE_GM12891_2x75_200_Rep1.assigned.count.txt	.txt.gz	ENCODE	Homo sapiens	Cell line	B-lymphocytes	1	Paired-end	https://www.ncbi.nlm.nih.gov/geo/download/?acc=GSE97211&format=file&file=GSE97211%5FENCODE%5FGM12891%5F2x75%5F200%5FRep1%2Eassigned%2Ecount%2Etxt%2Egz	Assigned read count of RPDs generated from ENCODE unstranded RNA-seq reads (GEO accession number: GSM958747)
Read count	ENCODE_GM12891_2x75_200_Rep2.assigned.count.txt	.txt.gz	ENCODE	Homo sapiens	Cell line	B-lymphocytes	2	Paired-end	https://www.ncbi.nlm.nih.gov/geo/download/?acc=GSE97211&format=file&file=GSE97211%5FENCODE%5FGM12891%5F2x75%5F200%5FRep2%2Eassigned%2Ecount%2Etxt%2Egz	Assigned read count of RPDs generated from ENCODE unstranded RNA-seq reads (GEO accession number: GSM958747)
Read count	ENCODE_GM12892_2x75_200_Rep1.assigned.count.txt	.txt.gz	ENCODE	Homo sapiens	Cell line	B-lymphocytes	1	Paired-end	https://www.ncbi.nlm.nih.gov/geo/download/?acc=GSE97211&format=file&file=GSE97211%5FENCODE%5FGM12892%5F2x75%5F200%5FRep1%2Eassigned%2Ecount%2Etxt%2Egz	Assigned read count of RPDs generated from ENCODE unstranded RNA-seq reads (GEO accession number: GSM958748)
Read count	ENCODE_GM12892_2x75_200_Rep2.assigned.count.txt	.txt.gz	ENCODE	Homo sapiens	Cell line	B-lymphocytes	2	Paired-end	https://www.ncbi.nlm.nih.gov/geo/download/?acc=GSE97211&format=file&file=GSE97211%5FENCODE%5FGM12892%5F2x75%5F200%5FRep2%2Eassigned%2Ecount%2Etxt%2Egz	Assigned read count of RPDs generated from ENCODE unstranded RNA-seq reads (GEO accession number: GSM958748)
Read count	ENCODE_GM12892_2x75_200_Rep3.assigned.count.txt	.txt.gz	ENCODE	Homo sapiens	Cell line	B-lymphocytes	3	Paired-end	https://www.ncbi.nlm.nih.gov/geo/download/?acc=GSE97211&format=file&file=GSE97211%5FENCODE%5FGM12892%5F2x75%5F200%5FRep3%2Eassigned%2Ecount%2Etxt%2Egz	Assigned read count of RPDs generated from ENCODE unstranded RNA-seq reads (GEO accession number: GSM958748)
Read count	ENCODE_H1-hESC_2x75_200_Rep1.assigned.count.txt	.txt.gz	ENCODE	Homo sapiens	Cell line	Embryonic stem cells	1	Paired-end	https://www.ncbi.nlm.nih.gov/geo/download/?acc=GSE97211&format=file&file=GSE97211%5FENCODE%5FH1%2DhESC%5F2x75%5F200%5FRep1%2Eassigned%2Ecount%2Etxt%2Egz	Assigned read count of RPDs generated from ENCODE unstranded RNA-seq reads (GEO accession number:GSM958733)
Read count	ENCODE_H1-hESC_2x75_200_Rep2.assigned.count.txt	.txt.gz	ENCODE	Homo sapiens	Cell line	Embryonic stem cells	2	Paired-end	https://www.ncbi.nlm.nih.gov/geo/download/?acc=GSE97211&format=file&file=GSE97211%5FENCODE%5FH1%2DhESC%5F2x75%5F200%5FRep2%2Eassigned%2Ecount%2Etxt%2Egz	Assigned read count of RPDs generated from ENCODE unstranded RNA-seq reads (GEO accession number:GSM958733)
Read count	ENCODE_H1-hESC_2x75_200_Rep3.assigned.count.txt	.txt.gz	ENCODE	Homo sapiens	Cell line	Embryonic stem cells	3	Paired-end	https://www.ncbi.nlm.nih.gov/geo/download/?acc=GSE97211&format=file&file=GSE97211%5FENCODE%5FH1%2DhESC%5F2x75%5F200%5FRep3%2Eassigned%2Ecount%2Etxt%2Egz	Assigned read count of RPDs generated from ENCODE unstranded RNA-seq reads (GEO accession number:GSM958733)
Read count	ENCODE_H1-hESC_2x75_200_Rep4.assigned.count.txt	.txt.gz	ENCODE	Homo sapiens	Cell line	Embryonic stem cells	4	Paired-end	https://www.ncbi.nlm.nih.gov/geo/download/?acc=GSE97211&format=file&file=GSE97211%5FENCODE%5FH1%2DhESC%5F2x75%5F200%5FRep4%2Eassigned%2Ecount%2Etxt%2Egz	Assigned read count of RPDs generated from ENCODE unstranded RNA-seq reads (GEO accession number:GSM958733)
Read count	ENCODE_H1-hESC_2x75_400_Rep1.assigned.count.txt	.txt.gz	ENCODE	Homo sapiens	Cell line	Embryonic stem cells	1	Paired-end	https://www.ncbi.nlm.nih.gov/geo/download/?acc=GSE97211&format=file&file=GSE97211%5FENCODE%5FH1%2DhESC%5F2x75%5F400%5FRep1%2Eassigned%2Ecount%2Etxt%2Egz	Assigned read count of RPDs generated from ENCODE unstranded RNA-seq reads (GEO accession number:GSM958733)
Read count	ENCODE_HeLa-S3_2x75_200_Rep1.assigned.count.txt	.txt.gz	ENCODE	Homo sapiens	Cell line	Skeletal muscle myoblasts	1	Paired-end	https://www.ncbi.nlm.nih.gov/geo/download/?acc=GSE97211&format=file&file=GSE97211%5FENCODE%5FHSMM%5F2x75%5F200%5FRep1%2Eassigned%2Ecount%2Etxt%2Egz	Assigned read count of RPDs generated from ENCODE unstranded RNA-seq reads (GEO accession number: GSM958744)
Read count	ENCODE_HeLa-S3_2x75_200_Rep2.assigned.count.txt	.txt.gz	ENCODE	Homo sapiens	Cell line	Skeletal muscle myoblasts	2	Paired-end	https://www.ncbi.nlm.nih.gov/geo/download/?acc=GSE97211&format=file&file=GSE97211%5FENCODE%5FHSMM%5F2x75%5F200%5FRep2%2Eassigned%2Ecount%2Etxt%2Egz	Assigned read count of RPDs generated from ENCODE unstranded RNA-seq reads (GEO accession number: GSM958744)
Read count	ENCODE_HepG2_2x75_200_Rep1.assigned.count.txt	.txt.gz	ENCODE	Homo sapiens	Cell line	Umbilical vein endothelial cells	1	Paired-end	https://www.ncbi.nlm.nih.gov/geo/download/?acc=GSE97211&format=file&file=GSE97211%5FENCODE%5FHUVEC%5F2x75%5F200%5FRep1%2Eassigned%2Ecount%2Etxt%2Egz	Assigned read count of RPDs generated from ENCODE unstranded RNA-seq reads (GEO accession number: GSM958734)
Read count	ENCODE_HepG2_2x75_200_Rep2.assigned.count.txt	.txt.gz	ENCODE	Homo sapiens	Cell line	Umbilical vein endothelial cells	2	Paired-end	https://www.ncbi.nlm.nih.gov/geo/download/?acc=GSE97211&format=file&file=GSE97211%5FENCODE%5FHUVEC%5F2x75%5F200%5FRep2%2Eassigned%2Ecount%2Etxt%2Egz	Assigned read count of RPDs generated from ENCODE unstranded RNA-seq reads (GEO accession number: GSM958734)
Read count	ENCODE_HSMM_2x75_200_Rep1.assigned.count.txt	.txt.gz	ENCODE	Homo sapiens	Cell line	Cervical cancer cells	1	Paired-end	https://www.ncbi.nlm.nih.gov/geo/download/?acc=GSE97211&format=file&file=GSE97211%5FENCODE%5FHeLa%2DS3%5F2x75%5F200%5FRep1%2Eassigned%2Ecount%2Etxt%2Egz	Assigned read count of RPDs generated from ENCODE unstranded RNA-seq reads (GEO accession number: GSM958735)
Read count	ENCODE_HSMM_2x75_200_Rep2.assigned.count.txt	.txt.gz	ENCODE	Homo sapiens	Cell line	Cervical cancer cells	2	Paired-end	https://www.ncbi.nlm.nih.gov/geo/download/?acc=GSE97211&format=file&file=GSE97211%5FENCODE%5FHeLa%2DS3%5F2x75%5F200%5FRep2%2Eassigned%2Ecount%2Etxt%2Egz	Assigned read count of RPDs generated from ENCODE unstranded RNA-seq reads (GEO accession number: GSM958735)
Read count	ENCODE_HUVEC_2x75_200_Rep1.assigned.count.txt	.txt.gz	ENCODE	Homo sapiens	Cell line	Liver cancer cells	1	Paired-end	https://www.ncbi.nlm.nih.gov/geo/download/?acc=GSE97211&format=file&file=GSE97211%5FENCODE%5FHepG2%5F2x75%5F200%5FRep1%2Eassigned%2Ecount%2Etxt%2Egz	Assigned read count of RPDs generated from ENCODE unstranded RNA-seq reads (GEO accession number: GSM958732)
Read count	ENCODE_HUVEC_2x75_200_Rep2.assigned.count.txt	.txt.gz	ENCODE	Homo sapiens	Cell line	Liver cancer cells	2	Paired-end	https://www.ncbi.nlm.nih.gov/geo/download/?acc=GSE97211&format=file&file=GSE97211%5FENCODE%5FHepG2%5F2x75%5F200%5FRep2%2Eassigned%2Ecount%2Etxt%2Egz	Assigned read count of RPDs generated from ENCODE unstranded RNA-seq reads (GEO accession number: GSM958732)
Read count	ENCODE_K562_2x75_200_Rep1.assigned.count.txt	.txt.gz	ENCODE	Homo sapiens	Cell line	Myelogenous leukemia cells	1	Paired-end	https://www.ncbi.nlm.nih.gov/geo/download/?acc=GSE97211&format=file&file=GSE97211%5FENCODE%5FK562%5F2x75%5F200%5FRep1%2Eassigned%2Ecount%2Etxt%2Egz	Assigned read count of RPDs generated from ENCODE unstranded RNA-seq reads (GEO accession number: GSM958729)
Read count	ENCODE_K562_2x75_200_Rep2.assigned.count.txt	.txt.gz	ENCODE	Homo sapiens	Cell line	Myelogenous leukemia cells	2	Paired-end	https://www.ncbi.nlm.nih.gov/geo/download/?acc=GSE97211&format=file&file=GSE97211%5FENCODE%5FK562%5F2x75%5F200%5FRep2%2Eassigned%2Ecount%2Etxt%2Egz	Assigned read count of RPDs generated from ENCODE unstranded RNA-seq reads (GEO accession number: GSM958729)
Read count	ENCODE_MCF-7_2x75_200_Rep1.assigned.count.txt	.txt.gz	ENCODE	Homo sapiens	Cell line	Breast cancer cells	1	Paired-end	https://www.ncbi.nlm.nih.gov/geo/download/?acc=GSE97211&format=file&file=GSE97211%5FENCODE%5FMCF%2D7%5F2x75%5F200%5FRep1%2Eassigned%2Ecount%2Etxt%2Egz	Assigned read count of RPDs generated from ENCODE unstranded RNA-seq reads (GEO accession number: GSM958745)
Read count	ENCODE_MCF-7_2x75_200_Rep2.assigned.count.txt	.txt.gz	ENCODE	Homo sapiens	Cell line	Breast cancer cells	2	Paired-end	https://www.ncbi.nlm.nih.gov/geo/download/?acc=GSE97211&format=file&file=GSE97211%5FENCODE%5FMCF%2D7%5F2x75%5F200%5FRep2%2Eassigned%2Ecount%2Etxt%2Egz	Assigned read count of RPDs generated from ENCODE unstranded RNA-seq reads (GEO accession number: GSM958745)
Read count	ENCODE_MCF-7_2x75_200_Rep3.assigned.count.txt	.txt.gz	ENCODE	Homo sapiens	Cell line	Breast cancer cells	3	Paired-end	https://www.ncbi.nlm.nih.gov/geo/download/?acc=GSE97211&format=file&file=GSE97211%5FENCODE%5FMCF%2D7%5F2x75%5F200%5FRep3%2Eassigned%2Ecount%2Etxt%2Egz	Assigned read count of RPDs generated from ENCODE unstranded RNA-seq reads (GEO accession number: GSM958745)
Read count	ENCODE_NHEK_2x75_200_Rep1.assigned.count.txt	.txt.gz	ENCODE	Homo sapiens	Cell line	Epidermal keratinocytes	1	Paired-end	https://www.ncbi.nlm.nih.gov/geo/download/?acc=GSE97211&format=file&file=GSE97211%5FENCODE%5FNHEK%5F2x75%5F200%5FRep1%2Eassigned%2Ecount%2Etxt%2Egz	Assigned read count of RPDs generated from ENCODE unstranded RNA-seq reads (GEO accession number: GSM958736)
Read count	ENCODE_NHEK_2x75_200_Rep2.assigned.count.txt	.txt.gz	ENCODE	Homo sapiens	Cell line	Epidermal keratinocytes	2	Paired-end	https://www.ncbi.nlm.nih.gov/geo/download/?acc=GSE97211&format=file&file=GSE97211%5FENCODE%5FNHEK%5F2x75%5F200%5FRep2%2Eassigned%2Ecount%2Etxt%2Egz	Assigned read count of RPDs generated from ENCODE unstranded RNA-seq reads (GEO accession number: GSM958736)
Read count	ENCODE_NHLF_2x75_200_Rep1.assigned.count.txt	.txt.gz	ENCODE	Homo sapiens	Cell line	Lung fibroblasts	1	Paired-end	https://www.ncbi.nlm.nih.gov/geo/download/?acc=GSE97211&format=file&file=GSE97211%5FENCODE%5FNHLF%5F2x75%5F200%5FRep1%2Eassigned%2Ecount%2Etxt%2Egz	Assigned read count of RPDs generated from ENCODE unstranded RNA-seq reads (GEO accession number: GSM958746)
Read count	ENCODE_NHLF_2x75_200_Rep2.assigned.count.txt	.txt.gz	ENCODE	Homo sapiens	Cell line	Lung fibroblasts	2	Paired-end	https://www.ncbi.nlm.nih.gov/geo/download/?acc=GSE97211&format=file&file=GSE97211%5FENCODE%5FNHLF%5F2x75%5F200%5FRep2%2Eassigned%2Ecount%2Etxt%2Egz	Assigned read count of RPDs generated from ENCODE unstranded RNA-seq reads (GEO accession number: GSM958746)
Read count	Human_BodyMap_Adipose_single_end.assigned.count.txt	.txt.gz	Human BodyMap 2.0	Homo sapiens	Tissue	Adipose	1	Single-end	https://www.ncbi.nlm.nih.gov/geo/download/?acc=GSE97211&format=file&file=GSE97211%5FHuman%5FBodyMap%5FAdipose%5Fsingle%5Fend%2Eassigned%2Ecount%2Etxt%2Egz	Assigned read count of RPDs generated from Human BodyMap 2.0 unstranded RNA-seq reads (GEO accession number: GSM759490)
Read count	Human_BodyMap_Adipose_paired_end.assigned.count.txt	.txt.gz	Human BodyMap 2.0	Homo sapiens	Tissue	Adipose	1	Paired-end	https://www.ncbi.nlm.nih.gov/geo/download/?acc=GSE97211&format=file&file=GSE97211%5FHuman%5FBodyMap%5FAdipose%5Fpaired%5Fend%2Eassigned%2Ecount%2Etxt%2Egz	Assigned read count of RPDs generated from Human BodyMap 2.0 unstranded RNA-seq reads (GEO accession number: GSM759491)
Read count	Human_BodyMap_Adrenal_single_end.assigned.count.txt	.txt.gz	Human BodyMap 2.0	Homo sapiens	Tissue	Adrenal	1	Single-end	https://www.ncbi.nlm.nih.gov/geo/download/?acc=GSE97211&format=file&file=GSE97211%5FHuman%5FBodyMap%5FAdrenal%5Fsingle%5Fend%2Eassigned%2Ecount%2Etxt%2Egz	Assigned read count of RPDs generated from Human BodyMap 2.0 unstranded RNA-seq reads (GEO accession number: GSM759492)
Read count	Human_BodyMap_Adrenal_paired_end.assigned.count.txt	.txt.gz	Human BodyMap 2.0	Homo sapiens	Tissue	Adrenal	1	Paired-end	https://www.ncbi.nlm.nih.gov/geo/download/?acc=GSE97211&format=file&file=GSE97211%5FHuman%5FBodyMap%5FAdrenal%5Fpaired%5Fend%2Eassigned%2Ecount%2Etxt%2Egz	Assigned read count of RPDs generated from Human BodyMap 2.0 unstranded RNA-seq reads (GEO accession number: GSM759493)
Read count	Human_BodyMap_Brain_single_end.assigned.count.txt	.txt.gz	Human BodyMap 2.0	Homo sapiens	Tissue	Brain	1	Single-end	https://www.ncbi.nlm.nih.gov/geo/download/?acc=GSE97211&format=file&file=GSE97211%5FHuman%5FBodyMap%5FBrain%5Fsingle%5Fend%2Eassigned%2Ecount%2Etxt%2Egz	Assigned read count of RPDs generated from Human BodyMap 2.0 unstranded RNA-seq reads (GEO accession number: GSM759494)
Read count	Human_BodyMap_Brain_paired_end.assigned.count.txt	.txt.gz	Human BodyMap 2.0	Homo sapiens	Tissue	Brain	1	Paired-end	https://www.ncbi.nlm.nih.gov/geo/download/?acc=GSE97211&format=file&file=GSE97211%5FHuman%5FBodyMap%5FBrain%5Fpaired%5Fend%2Eassigned%2Ecount%2Etxt%2Egz	Assigned read count of RPDs generated from Human BodyMap 2.0 unstranded RNA-seq reads (GEO accession number: GSM759495)
Read count	Human_BodyMap_Breast_single_end.assigned.count.txt	.txt.gz	Human BodyMap 2.0	Homo sapiens	Tissue	Breast	1	Single-end	https://www.ncbi.nlm.nih.gov/geo/download/?acc=GSE97211&format=file&file=GSE97211%5FHuman%5FBodyMap%5FBreast%5Fsingle%5Fend%2Eassigned%2Ecount%2Etxt%2Egz	Assigned read count of RPDs generated from Human BodyMap 2.0 unstranded RNA-seq reads (GEO accession number: GSM759496)
Read count	Human_BodyMap_Breast_paired_end.assigned.count.txt	.txt.gz	Human BodyMap 2.0	Homo sapiens	Tissue	Breast	1	Paired-end	https://www.ncbi.nlm.nih.gov/geo/download/?acc=GSE97211&format=file&file=GSE97211%5FHuman%5FBodyMap%5FBreast%5Fpaired%5Fend%2Eassigned%2Ecount%2Etxt%2Egz	Assigned read count of RPDs generated from Human BodyMap 2.0 unstranded RNA-seq reads (GEO accession number: GSM759497)
Read count	Human_BodyMap_Colon_single_end.assigned.count.txt	.txt.gz	Human BodyMap 2.0	Homo sapiens	Tissue	Colon	1	Single-end	https://www.ncbi.nlm.nih.gov/geo/download/?acc=GSE97211&format=file&file=GSE97211%5FHuman%5FBodyMap%5FColon%5Fsingle%5Fend%2Eassigned%2Ecount%2Etxt%2Egz	Assigned read count of RPDs generated from Human BodyMap 2.0 unstranded RNA-seq reads (GEO accession number: GSM759498)
Read count	Human_BodyMap_Colon_paired_end.assigned.count.txt	.txt.gz	Human BodyMap 2.0	Homo sapiens	Tissue	Colon	1	Paired-end	https://www.ncbi.nlm.nih.gov/geo/download/?acc=GSE97211&format=file&file=GSE97211%5FHuman%5FBodyMap%5FColon%5Fpaired%5Fend%2Eassigned%2Ecount%2Etxt%2Egz	Assigned read count of RPDs generated from Human BodyMap 2.0 unstranded RNA-seq reads (GEO accession number: GSM759499)
Read count	Human_BodyMap_Heart_single_end.assigned.count.txt	.txt.gz	Human BodyMap 2.0	Homo sapiens	Tissue	Heart	1	Single-end	https://www.ncbi.nlm.nih.gov/geo/download/?acc=GSE97211&format=file&file=GSE97211%5FHuman%5FBodyMap%5FHeart%5Fsingle%5Fend%2Eassigned%2Ecount%2Etxt%2Egz	Assigned read count of RPDs generated from Human BodyMap 2.0 unstranded RNA-seq reads (GEO accession number: GSM759500)
Read count	Human_BodyMap_Heart_paired_end.assigned.count.txt	.txt.gz	Human BodyMap 2.0	Homo sapiens	Tissue	Heart	1	Paired-end	https://www.ncbi.nlm.nih.gov/geo/download/?acc=GSE97211&format=file&file=GSE97211%5FHuman%5FBodyMap%5FHeart%5Fpaired%5Fend%2Eassigned%2Ecount%2Etxt%2Egz	Assigned read count of RPDs generated from Human BodyMap 2.0 unstranded RNA-seq reads (GEO accession number: GSM759501)
Read count	Human_BodyMap_Kidney_single_end.assigned.count.txt	.txt.gz	Human BodyMap 2.0	Homo sapiens	Tissue	Kidney	1	Single-end	https://www.ncbi.nlm.nih.gov/geo/download/?acc=GSE97211&format=file&file=GSE97211%5FHuman%5FBodyMap%5FKidney%5Fsingle%5Fend%2Eassigned%2Ecount%2Etxt%2Egz	Assigned read count of RPDs generated from Human BodyMap 2.0 unstranded RNA-seq reads (GEO accession number: GSM759502)
Read count	Human_BodyMap_Kidney_paired_end.assigned.count.txt	.txt.gz	Human BodyMap 2.0	Homo sapiens	Tissue	Kidney	1	Paired-end	https://www.ncbi.nlm.nih.gov/geo/download/?acc=GSE97211&format=file&file=GSE97211%5FHuman%5FBodyMap%5FKidney%5Fpaired%5Fend%2Eassigned%2Ecount%2Etxt%2Egz	Assigned read count of RPDs generated from Human BodyMap 2.0 unstranded RNA-seq reads (GEO accession number: GSM759503)
Read count	Human_BodyMap_Liver_single_end.assigned.count.txt	.txt.gz	Human BodyMap 2.0	Homo sapiens	Tissue	Liver	1	Single-end	https://www.ncbi.nlm.nih.gov/geo/download/?acc=GSE97211&format=file&file=GSE97211%5FHuman%5FBodyMap%5FLiver%5Fsingle%5Fend%2Eassigned%2Ecount%2Etxt%2Egz	Assigned read count of RPDs generated from Human BodyMap 2.0 unstranded RNA-seq reads (GEO accession number: GSM759504)
Read count	Human_BodyMap_Liver_paired_end.assigned.count.txt	.txt.gz	Human BodyMap 2.0	Homo sapiens	Tissue	Liver	1	Paired-end	https://www.ncbi.nlm.nih.gov/geo/download/?acc=GSE97211&format=file&file=GSE97211%5FHuman%5FBodyMap%5FLiver%5Fpaired%5Fend%2Eassigned%2Ecount%2Etxt%2Egz	Assigned read count of RPDs generated from Human BodyMap 2.0 unstranded RNA-seq reads (GEO accession number: GSM759505)
Read count	Human_BodyMap_Lung_single_end.assigned.count.txt	.txt.gz	Human BodyMap 2.0	Homo sapiens	Tissue	Lung	1	Single-end	https://www.ncbi.nlm.nih.gov/geo/download/?acc=GSE97211&format=file&file=GSE97211%5FHuman%5FBodyMap%5FLung%5Fsingle%5Fend%2Eassigned%2Ecount%2Etxt%2Egz	Assigned read count of RPDs generated from Human BodyMap 2.0 unstranded RNA-seq reads (GEO accession number: GSM759506)
Read count	Human_BodyMap_Lung_paired_end.assigned.count.txt	.txt.gz	Human BodyMap 2.0	Homo sapiens	Tissue	Lung	1	Paired-end	https://www.ncbi.nlm.nih.gov/geo/download/?acc=GSE97211&format=file&file=GSE97211%5FHuman%5FBodyMap%5FLung%5Fpaired%5Fend%2Eassigned%2Ecount%2Etxt%2Egz	Assigned read count of RPDs generated from Human BodyMap 2.0 unstranded RNA-seq reads (GEO accession number: GSM759507)
Read count	Human_BodyMap_LymphNode_single_end.assigned.count.txt	.txt.gz	Human BodyMap 2.0	Homo sapiens	Tissue	LymphNode	1	Single-end	https://www.ncbi.nlm.nih.gov/geo/download/?acc=GSE97211&format=file&file=GSE97211%5FHuman%5FBodyMap%5FLymphNode%5Fsingle%5Fend%2Eassigned%2Ecount%2Etxt%2Egz	Assigned read count of RPDs generated from Human BodyMap 2.0 unstranded RNA-seq reads (GEO accession number: GSM759508)
Read count	Human_BodyMap_LymphNode_paired_end.assigned.count.txt	.txt.gz	Human BodyMap 2.0	Homo sapiens	Tissue	LymphNode	1	Paired-end	https://www.ncbi.nlm.nih.gov/geo/download/?acc=GSE97211&format=file&file=GSE97211%5FHuman%5FBodyMap%5FLymphNode%5Fpaired%5Fend%2Eassigned%2Ecount%2Etxt%2Egz	Assigned read count of RPDs generated from Human BodyMap 2.0 unstranded RNA-seq reads (GEO accession number: GSM759509)
Read count	Human_BodyMap_Ovary_single_end.assigned.count.txt	.txt.gz	Human BodyMap 2.0	Homo sapiens	Tissue	Ovary	1	Single-end	https://www.ncbi.nlm.nih.gov/geo/download/?acc=GSE97211&format=file&file=GSE97211%5FHuman%5FBodyMap%5FOvary%5Fsingle%5Fend%2Eassigned%2Ecount%2Etxt%2Egz	Assigned read count of RPDs generated from Human BodyMap 2.0 unstranded RNA-seq reads (GEO accession number: GSM759510)
Read count	Human_BodyMap_Ovary_paired_end.assigned.count.txt	.txt.gz	Human BodyMap 2.0	Homo sapiens	Tissue	Ovary	1	Paired-end	https://www.ncbi.nlm.nih.gov/geo/download/?acc=GSE97211&format=file&file=GSE97211%5FHuman%5FBodyMap%5FOvary%5Fpaired%5Fend%2Eassigned%2Ecount%2Etxt%2Egz	Assigned read count of RPDs generated from Human BodyMap 2.0 unstranded RNA-seq reads (GEO accession number: GSM759511)
Read count	Human_BodyMap_Prostate_single_end.assigned.count.txt	.txt.gz	Human BodyMap 2.0	Homo sapiens	Tissue	Prostate	1	Single-end	https://www.ncbi.nlm.nih.gov/geo/download/?acc=GSE97211&format=file&file=GSE97211%5FHuman%5FBodyMap%5FProstate%5Fsingle%5Fend%2Eassigned%2Ecount%2Etxt%2Egz	Assigned read count of RPDs generated from Human BodyMap 2.0 unstranded RNA-seq reads (GEO accession number: GSM759512)
Read count	Human_BodyMap_Prostate_paired_end.assigned.count.txt	.txt.gz	Human BodyMap 2.0	Homo sapiens	Tissue	Prostate	1	Paired-end	https://www.ncbi.nlm.nih.gov/geo/download/?acc=GSE97211&format=file&file=GSE97211%5FHuman%5FBodyMap%5FProstate%5Fpaired%5Fend%2Eassigned%2Ecount%2Etxt%2Egz	Assigned read count of RPDs generated from Human BodyMap 2.0 unstranded RNA-seq reads (GEO accession number: GSM759513)
Read count	Human_BodyMap_SkeletalMuscle_single_end.assigned.count.txt	.txt.gz	Human BodyMap 2.0	Homo sapiens	Tissue	SkeletalMuscle	1	Single-end	https://www.ncbi.nlm.nih.gov/geo/download/?acc=GSE97211&format=file&file=GSE97211%5FHuman%5FBodyMap%5FSkeletalMuscle%5Fsingle%5Fend%2Eassigned%2Ecount%2Etxt%2Egz	Assigned read count of RPDs generated from Human BodyMap 2.0 unstranded RNA-seq reads (GEO accession number: GSM759514)
Read count	Human_BodyMap_SkeletalMuscle_paired_end.assigned.count.txt	.txt.gz	Human BodyMap 2.0	Homo sapiens	Tissue	SkeletalMuscle	1	Paired-end	https://www.ncbi.nlm.nih.gov/geo/download/?acc=GSE97211&format=file&file=GSE97211%5FHuman%5FBodyMap%5FSkeletalMuscle%5Fpaired%5Fend%2Eassigned%2Ecount%2Etxt%2Egz	Assigned read count of RPDs generated from Human BodyMap 2.0 unstranded RNA-seq reads (GEO accession number: GSM759515)
Read count	Human_BodyMap_Testis_single_end.assigned.count.txt	.txt.gz	Human BodyMap 2.0	Homo sapiens	Tissue	Testis	1	Single-end	https://www.ncbi.nlm.nih.gov/geo/download/?acc=GSE97211&format=file&file=GSE97211%5FHuman%5FBodyMap%5FTestis%5Fsingle%5Fend%2Eassigned%2Ecount%2Etxt%2Egz	Assigned read count of RPDs generated from Human BodyMap 2.0 unstranded RNA-seq reads (GEO accession number: GSM759516)
Read count	Human_BodyMap_Testis_paired_end.assigned.count.txt	.txt.gz	Human BodyMap 2.0	Homo sapiens	Tissue	Testis	1	Paired-end	https://www.ncbi.nlm.nih.gov/geo/download/?acc=GSE97211&format=file&file=GSE97211%5FHuman%5FBodyMap%5FTestis%5Fpaired%5Fend%2Eassigned%2Ecount%2Etxt%2Egz	Assigned read count of RPDs generated from Human BodyMap 2.0 unstranded RNA-seq reads (GEO accession number: GSM759517)
Read count	Human_BodyMap_Thyroid_single_end.assigned.count.txt	.txt.gz	Human BodyMap 2.0	Homo sapiens	Tissue	Thyroid	1	Single-end	https://www.ncbi.nlm.nih.gov/geo/download/?acc=GSE97211&format=file&file=GSE97211%5FHuman%5FBodyMap%5FThyroid%5Fsingle%5Fend%2Eassigned%2Ecount%2Etxt%2Egz	Assigned read count of RPDs generated from Human BodyMap 2.0 unstranded RNA-seq reads (GEO accession number: GSM759518)
Read count	Human_BodyMap_Thyroid_paired_end.assigned.count.txt	.txt.gz	Human BodyMap 2.0	Homo sapiens	Tissue	Thyroid	1	Paired-end	https://www.ncbi.nlm.nih.gov/geo/download/?acc=GSE97211&format=file&file=GSE97211%5FHuman%5FBodyMap%5FThyroid%5Fpaired%5Fend%2Eassigned%2Ecount%2Etxt%2Egz	Assigned read count of RPDs generated from Human BodyMap 2.0 unstranded RNA-seq reads (GEO accession number: GSM759519)
Read count	Human_BodyMap_WhiteBloodCell_single_end.assigned.count.txt	.txt.gz	Human BodyMap 2.0	Homo sapiens	Tissue	WhiteBloodCell	1	Single-end	https://www.ncbi.nlm.nih.gov/geo/download/?acc=GSE97211&format=file&file=GSE97211%5FHuman%5FBodyMap%5FWhiteBloodCell%5Fsingle%5Fend%2Eassigned%2Ecount%2Etxt%2Egz	Assigned read count of RPDs generated from Human BodyMap 2.0 unstranded RNA-seq reads (GEO accession number: GSM759520)
Read count	Human_BodyMap_WhiteBloodCell_paired_end.assigned.count.txt	.txt.gz	Human BodyMap 2.0	Homo sapiens	Tissue	WhiteBloodCell	1	Paired-end	https://www.ncbi.nlm.nih.gov/geo/download/?acc=GSE97211&format=file&file=GSE97211%5FHuman%5FBodyMap%5FWhiteBloodCell%5Fpaired%5Fend%2Eassigned%2Ecount%2Etxt%2Egz	Assigned read count of RPDs generated from Human BodyMap 2.0 unstranded RNA-seq reads (GEO accession number: GSM759521)
Read count	HeLa-S3_paired_end.assigned.count.txt	.txt.gz	GEO	Homo sapiens	Cell line	Cervical cancer cells	1	Paired-end	https://www.ncbi.nlm.nih.gov/geo/download/?acc=GSE97211&format=file&file=GSE97211%5FHeLa%2DS3%5Fpaired%5Fend%2Eassigned%2Ecount%2Etxt%2Egz	Assigned read count of RPDs generated from HeLa-S3 unstranded RNA-seq reads (GEO accession number: GSM591659 and GSM591682)
Read count	mES_paired_end.assigned.count.txt	.txt.gz	GEO	Mus musculus	Cell line	Embryonic stem cells	1	Paired-end	https://www.ncbi.nlm.nih.gov/geo/download/?acc=GSE97211&format=file&file=GSE97211%5FmES%5Fpaired%5Fend%2Eassigned%2Ecount%2Etxt%2Egz	Assigned read count of RPDs generated from mES unstranded RNA-seq reads (GEO accession number: GSM2254467)
Read count	GTEx_Brain_cerebellum.assigned.count.tar	.tar.gz	GTEx	Homo sapiens	Tissue	Brain Cerebellum	・	Paired-end	https://www.ncbi.nlm.nih.gov/geo/download/?acc=GSE97211&format=file&file=GSE97211%5FGTEx%5FBrain%5Fcerebellum%2Eassigned%2Ecount%2Etar%2Egz	Assigned read count of RPDs generated from GTEx brain cerebellum RNA-seq reads (GTEx portal: http://www.gtexportal.org/home/)
Read count	GTEx_Brain_cortex.assigned.count.tar	.tar.gz	GTEx	Homo sapiens	Tissue	Brain Cortex	・	Paired-end	https://www.ncbi.nlm.nih.gov/geo/download/?acc=GSE97211&format=file&file=GSE97211%5FGTEx%5FBrain%5Fcortex%2Eassigned%2Ecount%2Etar%2Egz	Assigned read count of RPDs generated from GTEx brain cortex RNA-seq reads (GTEx portal: http://www.gtexportal.org/home/)
Read count	GTEx_Brain_frontal_cortex.assigned.count.tar	.tar.gz	GTEx	Homo sapiens	Tissue	Brain Frontal Cortex	・	Paired-end	https://www.ncbi.nlm.nih.gov/geo/download/?acc=GSE97211&format=file&file=GSE97211%5FGTEx%5FBrain%5Ffrontal%5Fcortex%2Eassigned%2Ecount%2Etar%2Egz	Assigned read count of RPDs generated from GTEx brain frontal cortex RNA-seq reads (GTEx portal: http://www.gtexportal.org/home/)
Read count	GTEx_Brain_hippocampus.assigned.count.tar	.tar.gz	GTEx	Homo sapiens	Tissue	Brain Hippocampus	・	Paired-end	https://www.ncbi.nlm.nih.gov/geo/download/?acc=GSE97211&format=file&file=GSE97211%5FGTEx%5FBrain%5Fhippocampus%2Eassigned%2Ecount%2Etar%2Egz	Assigned read count of RPDs generated from GTEx brain hippocampus RNA-seq reads (GTEx portal: http://www.gtexportal.org/home/)
Read count	GTEx_Brain_hypothalamus.assigned.count.tar	.tar.gz	GTEx	Homo sapiens	Tissue	Brain Hypothalamus	・	Paired-end	https://www.ncbi.nlm.nih.gov/geo/download/?acc=GSE97211&format=file&file=GSE97211%5FGTEx%5FBrain%5Fhypothalamus%2Eassigned%2Ecount%2Etar%2Egz	Assigned read count of RPDs generated from GTEx brain hypothalamus RNA-seq reads (GTEx portal: http://www.gtexportal.org/home/)
Read count	GTEx_Esophagus_Mucosa.assigned.count.tar	.tar.gz	GTEx	Homo sapiens	Tissue	Esophagus - Mucosa	・	Paired-end	https://www.ncbi.nlm.nih.gov/geo/download/?acc=GSE97211&format=file&file=GSE97211%5FGTEx%5FEsophagus%5FMucosa%2Eassigned%2Ecount%2Etar%2Egz	Assigned read count of RPDs generated from GTEx esophagus-mucosa RNA-seq reads (GTEx portal: http://www.gtexportal.org/home/)
Read count	GTEx_Kidney.assigned.count.tar	.tar.gz	GTEx	Homo sapiens	Tissue	Kidney	・	Paired-end	https://www.ncbi.nlm.nih.gov/geo/download/?acc=GSE97211&format=file&file=GSE97211%5FGTEx%5FKidney%2Eassigned%2Ecount%2Etar%2Egz	Assigned read count of RPDs generated from GTEx kidney RNA-seq reads (GTEx portal: http://www.gtexportal.org/home/)
Read count	GTEx_Liver.assigned.count.tar	.tar.gz	GTEx	Homo sapiens	Tissue	Liver	・	Paired-end	https://www.ncbi.nlm.nih.gov/geo/download/?acc=GSE97211&format=file&file=GSE97211%5FGTEx%5FLiver%2Eassigned%2Ecount%2Etar%2Egz	Assigned read count of RPDs generated from GTEx liver RNA-seq reads (GTEx portal: http://www.gtexportal.org/home/)
Read count	GTEx_Lung.assigned.count.tar	.tar.gz	GTEx	Homo sapiens	Tissue	Lung	・	Paired-end	https://www.ncbi.nlm.nih.gov/geo/download/?acc=GSE97211&format=file&file=GSE97211%5FGTEx%5FLung%2Eassigned%2Ecount%2Etar%2Egz	Assigned read count of RPDs generated from GTEx lung RNA-seq reads (GTEx portal: http://www.gtexportal.org/home/)
Read count	GTEx_Ovary.assigned.count.tar	.tar.gz	GTEx	Homo sapiens	Tissue	Ovary	・	Paired-end	https://www.ncbi.nlm.nih.gov/geo/download/?acc=GSE97211&format=file&file=GSE97211%5FGTEx%5FOvary%2Eassigned%2Ecount%2Etar%2Egz	Assigned read count of RPDs generated from GTEx ovary RNA-seq reads (GTEx portal: http://www.gtexportal.org/home/)
Read count	GTEx_Pancreas.assigned.count.tar	.tar.gz	GTEx	Homo sapiens	Tissue	Pancreas	・	Paired-end	https://www.ncbi.nlm.nih.gov/geo/download/?acc=GSE97211&format=file&file=GSE97211%5FGTEx%5FPancreas%2Eassigned%2Ecount%2Etar%2Egz	Assigned read count of RPDs generated from GTEx pancreas RNA-seq reads (GTEx portal: http://www.gtexportal.org/home/)
Read count	GTEx_Prostate.assigned.count.tar	.tar.gz	GTEx	Homo sapiens	Tissue	Prostate	・	Paired-end	https://www.ncbi.nlm.nih.gov/geo/download/?acc=GSE97211&format=file&file=GSE97211%5FGTEx%5FProstate%2Eassigned%2Ecount%2Etar%2Egz	Assigned read count of RPDs generated from GTEx prostate RNA-seq reads (GTEx portal: http://www.gtexportal.org/home/)
Read count	GTEx_Testis.assigned.count.tar	.tar.gz	GTEx	Homo sapiens	Tissue	Testis	・	Paired-end	https://www.ncbi.nlm.nih.gov/geo/download/?acc=GSE97211&format=file&file=GSE97211%5FGTEx%5FTestis%2Eassigned%2Ecount%2Etar%2Egz	Assigned read count of RPDs generated from GTEx testis RNA-seq reads (GTEx portal: http://www.gtexportal.org/home/)
Read count	GTEx_Whole_blood.assigned.count.tar	.tar.gz	GTEx	Homo sapiens	Tissue	Whole blood	・	Paired-end	https://www.ncbi.nlm.nih.gov/geo/download/?acc=GSE97211&format=file&file=GSE97211%5FGTEx%5FWhole%5Fblood%2Eassigned%2Ecount%2Etar%2Egz	Assigned read count of RPDs generated from GTEx whole blood RNA-seq reads (GTEx portal: http://www.gtexportal.org/home/)
Read count	TCGA_Esophagus_Adenocarcinoma_NOS.assigned.count.tar	.tar.gz	TCGA	Homo sapiens	Tissue	Esophagus Adenocarcinoma	・	Paired-end	https://www.ncbi.nlm.nih.gov/geo/download/?acc=GSE97211&format=file&file=GSE97211%5FTCGA%5FEsophagus%5FAdenocarcinoma%5FNOS%2Eassigned%2Ecount%2Etar%2Egz	Assigned read count of RPDs generated from TCGA esophagus carcinoma RNA-seq reads (TCGA portal: https://portal.gdc.cancer.gov/)
Read count	TCGA_Esophagus_Squamous_Cell_Carcinoma.assigned.count.tar	.tar.gz	TCGA	Homo sapiens	Tissue	Esophagus Squamous Cell Carcinoma	・	Paired-end	https://www.ncbi.nlm.nih.gov/geo/download/?acc=GSE97211&format=file&file=GSE97211%5FTCGA%5FEsophagus%5FSquamous%5FCell%5FCarcinoma%2Eassigned%2Ecount%2Etar%2Egz	Assigned read count of RPDs generated from TCGA esophagus carcinoma RNA-seq reads (TCGA portal: https://portal.gdc.cancer.gov/)
Read count	TCGA_Head_and_Neck_Squamous_Cell_Carcinoma.assigned.count.tar	.tar.gz	TCGA	Homo sapiens	Tissue	Head and Neck Squamous Cell Carcinoma	・	Paired-end	https://www.ncbi.nlm.nih.gov/geo/download/?acc=GSE97211&format=file&file=GSE97211%5FTCGA%5FHead%5Fand%5FNeck%5FSquamous%5FCell%5FCarcinoma%2Eassigned%2Ecount%2Etar%2Egz	Assigned read count of RPDs generated from TCGA head and neck squamous cell carcinoma RNA-seq reads (TCGA portal: https://portal.gdc.cancer.gov/)
Read count	TCGA_Liver_Hepatocellular_Carcinoma.assigned.count.tar	.tar.gz	TCGA	Homo sapiens	Tissue	Liver Hepatocellular Carcinoma	・	Paired-end	https://www.ncbi.nlm.nih.gov/geo/download/?acc=GSE97211&format=file&file=GSE97211%5FTCGA%5FLiver%5FHepatocellular%5FCarcinoma%2Eassigned%2Ecount%2Etar%2Egz	Assigned read count of RPDs generated from TCGA liver hepatocellular carcinoma RNA-seq reads (TCGA portal: https://portal.gdc.cancer.gov/)
Read count	TCGA_Lung_Adenocarcinoma.assigned.count.tar	.tar.gz	TCGA	Homo sapiens	Tissue	Lung Adenocarcinoma	・	Paired-end	https://www.ncbi.nlm.nih.gov/geo/download/?acc=GSE97211&format=file&file=GSE97211%5FTCGA%5FLung%5FAdenocarcinoma%2Eassigned%2Ecount%2Etar%2Egz	Assigned read count of RPDs generated from TCGA lung adenomcarcinoma RNA-seq reads (TCGA portal: https://portal.gdc.cancer.gov/)
Read count	TCGA_Lung_Squamous_Cell_Carcinoma.assigned.count.tar	.tar.gz	TCGA	Homo sapiens	Tissue	Lung Squamous Cell Carcinoma	・	Paired-end	https://www.ncbi.nlm.nih.gov/geo/download/?acc=GSE97211&format=file&file=GSE97211%5FTCGA%5FLung%5FSquamous%5FCell%5FCarcinoma%2Eassigned%2Ecount%2Etar%2Egz	Assigned read count of RPDs generated from TCGA lung squamous cell carcinoma RNA-seq reads (TCGA portal: https://portal.gdc.cancer.gov/)
